# Supplementary material for: Gene Regulatory Network Guided Investigations and Engineering of Storage Root Development in Root Crops
Source: Front Plant Sci. 2020 Jun 17;11:762. doi: 10.3389/fpls.2020.00762 (PMC7313660; doi:10.3389/fpls.2020.00762)
Supplement: TABLE S1 — List of 1,222 cambium-enriched genes identified in Arabidopsis root data. [file Table_1.xlsx]

## Sheet: Table Legends
		Gene regulatory network guided investigations and engineering of storage root development in root crops
		Nam V. Hoang1, Chulmin Park1, Muhammad Kamran1 and Ji-Young Lee1,2*
		1School of Biological Sciences, Seoul National University, Seoul, Korea
		2Plant Genomics and Breeding Institute, Seoul National University, Seoul, Korea
		*Correspondence: Ji-Young Lee,
		School of Biological Sciences, Seoul National University, 1 Gwanak-ro, Gwanak-gu, Seoul, Republic of Korea, 08826.
		E-mail: jl924@snu.ac.kr
		Table S1. List of 1,222 cambium enriched genes identified in Arabidopsis root data
		Table S2. Lists of DEGs, 403 common DEGs and 65 common TFs identified among the three major root crops, the cassava, carrot and radish
		Table S3. Gene ontology (GO) term functional analysis of 403 common DEGs analyzed by the STRING database
		Table S4. Gene network interactions of 403 common DEGs analyzed by STRING database

## Sheet: Table_S1
	Supplementary Table 1. List of 1,222 cambium enriched genes identified in Arabidopsis root data (Zhang et al, 2019)
	AT gene ID
	AT1G01120
	AT1G01170
	AT1G01200
	AT1G01320
	AT1G01470
	AT1G01480
	AT1G01640
	AT1G01970
	AT1G02020
	AT1G02300
	AT1G02400
	AT1G02450
	AT1G02475
	AT1G02730
	AT1G02860
	AT1G03600
	AT1G03620
	AT1G03630
	AT1G03820
	AT1G04240
	AT1G04420
	AT1G04550
	AT1G05190
	AT1G05400
	AT1G05460
	AT1G05575
	AT1G05600
	AT1G05710
	AT1G06420
	AT1G06450
	AT1G06520
	AT1G06640
	AT1G07000
	AT1G07090
	AT1G07150
	AT1G07430
	AT1G07880
	AT1G07900
	AT1G08210
	AT1G08380
	AT1G08940
	AT1G08980
	AT1G09310
	AT1G09340
	AT1G09415
	AT1G09570
	AT1G09910
	AT1G09950
	AT1G10650
	AT1G11120
	AT1G11210
	AT1G11280
	AT1G11330
	AT1G11420
	AT1G11580
	AT1G11840
	AT1G11950
	AT1G12250
	AT1G12330
	AT1G12430
	AT1G12610
	AT1G12780
	AT1G12900
	AT1G13610
	AT1G13700
	AT1G13710
	AT1G14090
	AT1G14120
	AT1G14240
	AT1G14270
	AT1G14345
	AT1G14790
	AT1G14890
	AT1G15000
	AT1G15010
	AT1G15300
	AT1G15340
	AT1G15820
	AT1G15980
	AT1G16060
	AT1G16070
	AT1G16080
	AT1G16460
	AT1G16530
	AT1G17040
	AT1G17100
	AT1G17140
	AT1G17220
	AT1G17380
	AT1G17420
	AT1G17480
	AT1G17650
	AT1G17750
	AT1G17830
	AT1G17840
	AT1G17930
	AT1G18060
	AT1G18400
	AT1G18590
	AT1G18670
	AT1G18710
	AT1G18730
	AT1G18870
	AT1G19050
	AT1G19210
	AT1G19330
	AT1G19380
	AT1G19600
	AT1G19610
	AT1G19850
	AT1G19980
	AT1G20020
	AT1G20340
	AT1G20490
	AT1G20620
	AT1G20700
	AT1G20823
	AT1G21100
	AT1G21410
	AT1G21440
	AT1G21500
	AT1G21670
	AT1G21680
	AT1G21810
	AT1G22180
	AT1G22510
	AT1G22650
	AT1G22690
	AT1G22810
	AT1G22885
	AT1G22985
	AT1G22990
	AT1G23220
	AT1G23360
	AT1G23380
	AT1G23390
	AT1G23710
	AT1G24020
	AT1G24330
	AT1G24625
	AT1G25470
	AT1G26150
	AT1G27680
	AT1G27730
	AT1G28050
	AT1G28330
	AT1G28370
	AT1G29340
	AT1G29660
	AT1G29670
	AT1G29950
	AT1G29980
	AT1G30040
	AT1G30490
	AT1G30530
	AT1G30610
	AT1G31290
	AT1G31320
	AT1G31335
	AT1G31550
	AT1G31580
	AT1G31800
	AT1G32060
	AT1G32080
	AT1G32470
	AT1G32630
	AT1G32920
	AT1G33060
	AT1G33170
	AT1G33280
	AT1G33420
	AT1G33811
	AT1G34260
	AT1G34640
	AT1G35140
	AT1G35190
	AT1G35250
	AT1G35420
	AT1G37130
	AT1G42470
	AT1G42970
	AT1G44575
	AT1G46480
	AT1G48300
	AT1G48450
	AT1G48600
	AT1G48690
	AT1G49450
	AT1G49650
	AT1G49720
	AT1G49750
	AT1G49840
	AT1G49850
	AT1G50420
	AT1G50450
	AT1G50590
	AT1G51110
	AT1G51500
	AT1G51670
	AT1G51700
	AT1G51805
	AT1G51920
	AT1G52100
	AT1G52150
	AT1G52220
	AT1G52230
	AT1G52400
	AT1G52410
	AT1G52830
	AT1G53170
	AT1G53430
	AT1G53440
	AT1G54780
	AT1G55260
	AT1G55510
	AT1G55610
	AT1G55670
	AT1G56150
	AT1G56500
	AT1G56580
	AT1G56660
	AT1G57770
	AT1G58270
	AT1G58420
	AT1G59910
	AT1G60000
	AT1G60160
	AT1G60190
	AT1G60270
	AT1G60420
	AT1G60470
	AT1G60870
	AT1G61260
	AT1G61340
	AT1G61360
	AT1G61370
	AT1G61520
	AT1G61720
	AT1G62280
	AT1G62290
	AT1G62360
	AT1G62540
	AT1G62560
	AT1G62770
	AT1G63030
	AT1G63040
	AT1G63100
	AT1G63720
	AT1G64100
	AT1G64180
	AT1G64380
	AT1G64405
	AT1G64510
	AT1G64590
	AT1G64720
	AT1G64740
	AT1G64890
	AT1G65390
	AT1G65860
	AT1G66100
	AT1G66350
	AT1G66830
	AT1G67110
	AT1G67340
	AT1G67700
	AT1G67740
	AT1G67810
	AT1G67830
	AT1G67910
	AT1G67920
	AT1G67970
	AT1G68010
	AT1G68220
	AT1G68360
	AT1G68470
	AT1G68530
	AT1G68590
	AT1G68640
	AT1G68760
	AT1G69160
	AT1G69230
	AT1G69270
	AT1G69440
	AT1G69870
	AT1G70200
	AT1G70510
	AT1G70520
	AT1G70830
	AT1G70890
	AT1G70920
	AT1G71030
	AT1G71450
	AT1G72180
	AT1G72250
	AT1G72360
	AT1G72450
	AT1G72520
	AT1G72610
	AT1G72650
	AT1G72940
	AT1G73090
	AT1G73130
	AT1G73500
	AT1G73540
	AT1G73590
	AT1G73600
	AT1G73760
	AT1G73880
	AT1G74090
	AT1G74100
	AT1G74450
	AT1G74520
	AT1G74670
	AT1G74770
	AT1G74890
	AT1G75280
	AT1G75350
	AT1G75690
	AT1G75900
	AT1G76070
	AT1G76160
	AT1G76650
	AT1G76730
	AT1G76790
	AT1G77060
	AT1G77280
	AT1G77400
	AT1G77850
	AT1G78290
	AT1G78370
	AT1G78490
	AT1G78780
	AT1G78960
	AT1G79310
	AT1G79460
	AT1G79470
	AT1G80060
	AT1G80640
	AT1G80870
	AT2G01180
	AT2G01580
	AT2G01610
	AT2G01820
	AT2G02120
	AT2G02230
	AT2G02850
	AT2G03090
	AT2G03420
	AT2G03530
	AT2G03980
	AT2G04400
	AT2G05380
	AT2G05520
	AT2G05530
	AT2G05540
	AT2G05940
	AT2G06030
	AT2G13840
	AT2G15050
	AT2G15090
	AT2G15820
	AT2G16400
	AT2G16630
	AT2G16700
	AT2G16890
	AT2G17040
	AT2G17120
	AT2G17150
	AT2G17220
	AT2G17230
	AT2G17660
	AT2G17840
	AT2G18210
	AT2G18360
	AT2G18440
	AT2G18470
	AT2G18480
	AT2G18500
	AT2G18700
	AT2G18950
	AT2G19650
	AT2G19780
	AT2G19970
	AT2G20340
	AT2G20550
	AT2G20850
	AT2G20950
	AT2G21280
	AT2G21330
	AT2G22080
	AT2G22430
	AT2G22500
	AT2G22540
	AT2G22650
	AT2G22860
	AT2G22880
	AT2G22890
	AT2G22920
	AT2G22990
	AT2G23030
	AT2G24130
	AT2G24270
	AT2G25270
	AT2G25420
	AT2G26190
	AT2G26250
	AT2G26380
	AT2G26500
	AT2G26910
	AT2G27060
	AT2G27230
	AT2G27680
	AT2G27690
	AT2G28120
	AT2G28305
	AT2G28310
	AT2G28510
	AT2G28570
	AT2G28800
	AT2G28930
	AT2G28950
	AT2G29340
	AT2G29460
	AT2G29630
	AT2G29650
	AT2G29660
	AT2G29670
	AT2G29890
	AT2G30040
	AT2G30470
	AT2G30570
	AT2G30840
	AT2G30860
	AT2G31040
	AT2G31160
	AT2G31350
	AT2G31730
	AT2G31790
	AT2G31820
	AT2G31980
	AT2G32100
	AT2G32480
	AT2G33100
	AT2G33310
	AT2G33620
	AT2G33770
	AT2G33820
	AT2G33850
	AT2G33860
	AT2G34140
	AT2G34200
	AT2G34460
	AT2G34490
	AT2G34510
	AT2G34710
	AT2G34790
	AT2G35155
	AT2G35260
	AT2G35370
	AT2G35930
	AT2G35940
	AT2G36120
	AT2G36570
	AT2G36870
	AT2G36990
	AT2G37210
	AT2G37660
	AT2G37710
	AT2G37760
	AT2G37900
	AT2G38470
	AT2G38540
	AT2G38860
	AT2G38970
	AT2G39140
	AT2G39220
	AT2G39310
	AT2G39660
	AT2G39730
	AT2G39930
	AT2G40370
	AT2G41010
	AT2G41100
	AT2G41230
	AT2G41460
	AT2G41540
	AT2G41640
	AT2G41680
	AT2G41710
	AT2G41720
	AT2G41890
	AT2G42040
	AT2G42220
	AT2G42360
	AT2G42610
	AT2G42760
	AT2G42840
	AT2G43000
	AT2G43030
	AT2G43100
	AT2G43520
	AT2G43530
	AT2G43535
	AT2G43550
	AT2G43560
	AT2G43800
	AT2G44690
	AT2G44830
	AT2G44920
	AT2G45100
	AT2G45210
	AT2G45340
	AT2G45820
	AT2G46250
	AT2G46310
	AT2G46400
	AT2G46510
	AT2G46680
	AT2G46820
	AT2G47010
	AT2G47190
	AT2G47260
	AT2G47520
	AT2G47560
	AT2G47620
	AT2G47630
	AT2G47770
	AT2G47780
	AT2G47910
	AT2G47950
	AT2G48010
	AT3G01210
	AT3G01430
	AT3G01480
	AT3G01770
	AT3G01830
	AT3G02050
	AT3G02800
	AT3G02840
	AT3G02885
	AT3G03040
	AT3G03190
	AT3G03310
	AT3G04220
	AT3G04290
	AT3G04550
	AT3G04630
	AT3G04650
	AT3G04860
	AT3G04940
	AT3G05120
	AT3G05510
	AT3G05640
	AT3G05880
	AT3G06750
	AT3G06950
	AT3G06980
	AT3G07540
	AT3G07700
	AT3G07740
	AT3G08030
	AT3G08940
	AT3G09070
	AT3G09390
	AT3G09520
	AT3G10000
	AT3G10080
	AT3G10930
	AT3G11020
	AT3G11840
	AT3G12080
	AT3G12200
	AT3G12490
	AT3G12520
	AT3G12700
	AT3G12890
	AT3G13175
	AT3G13380
	AT3G13650
	AT3G13784
	AT3G13880
	AT3G14060
	AT3G14160
	AT3G15110
	AT3G15210
	AT3G15360
	AT3G15720
	AT3G15840
	AT3G15850
	AT3G16140
	AT3G16170
	AT3G16280
	AT3G16370
	AT3G16450
	AT3G16520
	AT3G16530
	AT3G16660
	AT3G16670
	AT3G16720
	AT3G16770
	AT3G17020
	AT3G17250
	AT3G17680
	AT3G17930
	AT3G18080
	AT3G18100
	AT3G18680
	AT3G18920
	AT3G19470
	AT3G19710
	AT3G19960
	AT3G20015
	AT3G20500
	AT3G21055
	AT3G21090
	AT3G21690
	AT3G22190
	AT3G22810
	AT3G22900
	AT3G23250
	AT3G23295
	AT3G23340
	AT3G23570
	AT3G23580
	AT3G23640
	AT3G24430
	AT3G24660
	AT3G25130
	AT3G25290
	AT3G25640
	AT3G25730
	AT3G25870
	AT3G25920
	AT3G26060
	AT3G26460
	AT3G26650
	AT3G26740
	AT3G26980
	AT3G27200
	AT3G27400
	AT3G27540
	AT3G27690
	AT3G28340
	AT3G28850
	AT3G29670
	AT3G30340
	AT3G42725
	AT3G44260
	AT3G44720
	AT3G44890
	AT3G45140
	AT3G45160
	AT3G45960
	AT3G45970
	AT3G46070
	AT3G46110
	AT3G46540
	AT3G46650
	AT3G46920
	AT3G47070
	AT3G47600
	AT3G47650
	AT3G47960
	AT3G48520
	AT3G48610
	AT3G48690
	AT3G49140
	AT3G49670
	AT3G49690
	AT3G50380
	AT3G50410
	AT3G50650
	AT3G50685
	AT3G50700
	AT3G50820
	AT3G50830
	AT3G50930
	AT3G50970
	AT3G51030
	AT3G51450
	AT3G51670
	AT3G51780
	AT3G51810
	AT3G51820
	AT3G51890
	AT3G51950
	AT3G52400
	AT3G53190
	AT3G53280
	AT3G53380
	AT3G53620
	AT3G53950
	AT3G53960
	AT3G54050
	AT3G54260
	AT3G54630
	AT3G54640
	AT3G54820
	AT3G54890
	AT3G54950
	AT3G55040
	AT3G55470
	AT3G55800
	AT3G55840
	AT3G56140
	AT3G56400
	AT3G56810
	AT3G56940
	AT3G56980
	AT3G57010
	AT3G57030
	AT3G57390
	AT3G57430
	AT3G57450
	AT3G57470
	AT3G57530
	AT3G57780
	AT3G58530
	AT3G58690
	AT3G58790
	AT3G58990
	AT3G59060
	AT3G59080
	AT3G59340
	AT3G59350
	AT3G59400
	AT3G60190
	AT3G61310
	AT3G61380
	AT3G61630
	AT3G61670
	AT3G61820
	AT3G61830
	AT3G61870
	AT3G61890
	AT3G61990
	AT3G62130
	AT3G62150
	AT3G62260
	AT3G62410
	AT3G62740
	AT3G62910
	AT3G63140
	AT3G63440
	AT4G00040
	AT4G00200
	AT4G00300
	AT4G01090
	AT4G01150
	AT4G01390
	AT4G02020
	AT4G02290
	AT4G02360
	AT4G02410
	AT4G02430
	AT4G02550
	AT4G02630
	AT4G02770
	AT4G02850
	AT4G03070
	AT4G03210
	AT4G03230
	AT4G03280
	AT4G04640
	AT4G04890
	AT4G05030
	AT4G05100
	AT4G05180
	AT4G07400
	AT4G08110
	AT4G08150
	AT4G08780
	AT4G08850
	AT4G08950
	AT4G09010
	AT4G09510
	AT4G09550
	AT4G09640
	AT4G09760
	AT4G10030
	AT4G10340
	AT4G10390
	AT4G11130
	AT4G11280
	AT4G11480
	AT4G11880
	AT4G12030
	AT4G12350
	AT4G12470
	AT4G12480
	AT4G12490
	AT4G12800
	AT4G12880
	AT4G12890
	AT4G13195
	AT4G13280
	AT4G13670
	AT4G13770
	AT4G13830
	AT4G14060
	AT4G14270
	AT4G14365
	AT4G14390
	AT4G14440
	AT4G14680
	AT4G14770
	AT4G15090
	AT4G15100
	AT4G15110
	AT4G15120
	AT4G15130
	AT4G15440
	AT4G15920
	AT4G16230
	AT4G16240
	AT4G16770
	AT4G16820
	AT4G17090
	AT4G17500
	AT4G17600
	AT4G17760
	AT4G18170
	AT4G18480
	AT4G18880
	AT4G18910
	AT4G19510
	AT4G19810
	AT4G20170
	AT4G20230
	AT4G20430
	AT4G20830
	AT4G20930
	AT4G21280
	AT4G21620
	AT4G21680
	AT4G21750
	AT4G21760
	AT4G21870
	AT4G21960
	AT4G22270
	AT4G22560
	AT4G22610
	AT4G22730
	AT4G22753
	AT4G22780
	AT4G22890
	AT4G23030
	AT4G23680
	AT4G23810
	AT4G24110
	AT4G24130
	AT4G24510
	AT4G24780
	AT4G24970
	AT4G25470
	AT4G25490
	AT4G25620
	AT4G25640
	AT4G25880
	AT4G25910
	AT4G25960
	AT4G26200
	AT4G26370
	AT4G27280
	AT4G27440
	AT4G27654
	AT4G27800
	AT4G28150
	AT4G28230
	AT4G28250
	AT4G28430
	AT4G28460
	AT4G28490
	AT4G28750
	AT4G28950
	AT4G29020
	AT4G29060
	AT4G29080
	AT4G29190
	AT4G29240
	AT4G29270
	AT4G29420
	AT4G29660
	AT4G29720
	AT4G29750
	AT4G30430
	AT4G31000
	AT4G31500
	AT4G31780
	AT4G31800
	AT4G32250
	AT4G32340
	AT4G32730
	AT4G32800
	AT4G32880
	AT4G33010
	AT4G33070
	AT4G33220
	AT4G33300
	AT4G33510
	AT4G33560
	AT4G33980
	AT4G34090
	AT4G34160
	AT4G34230
	AT4G34240
	AT4G34250
	AT4G34390
	AT4G34400
	AT4G34410
	AT4G34710
	AT4G34990
	AT4G35020
	AT4G35480
	AT4G35550
	AT4G35580
	AT4G35600
	AT4G35730
	AT4G35980
	AT4G36040
	AT4G36150
	AT4G36260
	AT4G36430
	AT4G36610
	AT4G36650
	AT4G36670
	AT4G36830
	AT4G37150
	AT4G37290
	AT4G37300
	AT4G37380
	AT4G37410
	AT4G37550
	AT4G37750
	AT4G37780
	AT4G37800
	AT4G37870
	AT4G37930
	AT4G37970
	AT4G38160
	AT4G38210
	AT4G38770
	AT4G38970
	AT4G39180
	AT4G39320
	AT4G39330
	AT4G39510
	AT4G39550
	AT4G39570
	AT4G39640
	AT4G39720
	AT4G39900
	AT4G39970
	AT4G39980
	AT5G01210
	AT5G01240
	AT5G01380
	AT5G01500
	AT5G01530
	AT5G01730
	AT5G01780
	AT5G01790
	AT5G01920
	AT5G02160
	AT5G02810
	AT5G03270
	AT5G03380
	AT5G03680
	AT5G03720
	AT5G04340
	AT5G04760
	AT5G04810
	AT5G04950
	AT5G05180
	AT5G05200
	AT5G05250
	AT5G05300
	AT5G05320
	AT5G05350
	AT5G05870
	AT5G05940
	AT5G06080
	AT5G06720
	AT5G06730
	AT5G06870
	AT5G07580
	AT5G07920
	AT5G08260
	AT5G08650
	AT5G09660
	AT5G10180
	AT5G10380
	AT5G10690
	AT5G10750
	AT5G11020
	AT5G11070
	AT5G11160
	AT5G11300
	AT5G11410
	AT5G11420
	AT5G11510
	AT5G11650
	AT5G12140
	AT5G12270
	AT5G12330
	AT5G13000
	AT5G13200
	AT5G13400
	AT5G13720
	AT5G13810
	AT5G13880
	AT5G14410
	AT5G14450
	AT5G14700
	AT5G14760
	AT5G14910
	AT5G14920
	AT5G14940
	AT5G14960
	AT5G16000
	AT5G16010
	AT5G16030
	AT5G16820
	AT5G16960
	AT5G16970
	AT5G16990
	AT5G17000
	AT5G17170
	AT5G17350
	AT5G17670
	AT5G17700
	AT5G17850
	AT5G17980
	AT5G17990
	AT5G18170
	AT5G18310
	AT5G18660
	AT5G18750
	AT5G18770
	AT5G19600
	AT5G20220
	AT5G20230
	AT5G20630
	AT5G20900
	AT5G21105
	AT5G22270
	AT5G22290
	AT5G22500
	AT5G22510
	AT5G22530
	AT5G22630
	AT5G22740
	AT5G22860
	AT5G23010
	AT5G23020
	AT5G23060
	AT5G23120
	AT5G23570
	AT5G23580
	AT5G23820
	AT5G23890
	AT5G24010
	AT5G24420
	AT5G24470
	AT5G24670
	AT5G25475
	AT5G25610
	AT5G26340
	AT5G26670
	AT5G27270
	AT5G27350
	AT5G27560
	AT5G28490
	AT5G28520
	AT5G35735
	AT5G35790
	AT5G37980
	AT5G37990
	AT5G38020
	AT5G38030
	AT5G38980
	AT5G39720
	AT5G40150
	AT5G40250
	AT5G40460
	AT5G40910
	AT5G40920
	AT5G41460
	AT5G41620
	AT5G41700
	AT5G42310
	AT5G43170
	AT5G43760
	AT5G43780
	AT5G43980
	AT5G44000
	AT5G44050
	AT5G44400
	AT5G44720
	AT5G45250
	AT5G45670
	AT5G45680
	AT5G45930
	AT5G46050
	AT5G46110
	AT5G46330
	AT5G46350
	AT5G46470
	AT5G46700
	AT5G46710
	AT5G47220
	AT5G47410
	AT5G47550
	AT5G47640
	AT5G47710
	AT5G47850
	AT5G47910
	AT5G48220
	AT5G48485
	AT5G48490
	AT5G48590
	AT5G48800
	AT5G49520
	AT5G49530
	AT5G49630
	AT5G49990
	AT5G50130
	AT5G50250
	AT5G50360
	AT5G50930
	AT5G51130
	AT5G51190
	AT5G51350
	AT5G51390
	AT5G51750
	AT5G52010
	AT5G52310
	AT5G52320
	AT5G52390
	AT5G52970
	AT5G53130
	AT5G53320
	AT5G53570
	AT5G53830
	AT5G53880
	AT5G53990
	AT5G54090
	AT5G54270
	AT5G54290
	AT5G54400
	AT5G54500
	AT5G54770
	AT5G54930
	AT5G54960
	AT5G55180
	AT5G55250
	AT5G55530
	AT5G55560
	AT5G56160
	AT5G56590
	AT5G56760
	AT5G56780
	AT5G57100
	AT5G57130
	AT5G57560
	AT5G57940
	AT5G58120
	AT5G58150
	AT5G58200
	AT5G58330
	AT5G58500
	AT5G58520
	AT5G58600
	AT5G58630
	AT5G58680
	AT5G59310
	AT5G59700
	AT5G59720
	AT5G59730
	AT5G59830
	AT5G60030
	AT5G60540
	AT5G60690
	AT5G60890
	AT5G61210
	AT5G61290
	AT5G61420
	AT5G61480
	AT5G61590
	AT5G61600
	AT5G61660
	AT5G61810
	AT5G62350
	AT5G62470
	AT5G62570
	AT5G62940
	AT5G62980
	AT5G63140
	AT5G63320
	AT5G63330
	AT5G63450
	AT5G63580
	AT5G63980
	AT5G64040
	AT5G64450
	AT5G64870
	AT5G65170
	AT5G65260
	AT5G65310
	AT5G65600
	AT5G65700
	AT5G65790
	AT5G66350
	AT5G66570
	AT5G66640
	AT5G66650
	AT5G66670
	AT5G66700
	AT5G66770
	AT5G67480
	ATCG00340
	ATCG00470

## Sheet: Table_S2
	Supplementary Table 2. Lists of DEGs, 403 common DEGs and 65 common TFs identified among the three major root crops, the cassava, carrot and radish
	Cassava_DEGs_FC1.5	Carrot_DEGs_FC1.5	Radish_DEGs_FC1.5		403 common DEGs			65 common transcription factors	Gene description (adapted from Zhang et al 2019)
	AT1G01170	AT1G01470	AT4G36150		AT1G57770			AT4G37750	AP2-like ethylene-responsive transcription factor ANT [Source:UniProtKB/Swiss-Prot;Acc:Q38914]
	AT1G01970	AT1G02400	AT1G01200		AT5G18170			AT5G03680	Trihelix transcription factor PTL [Source:UniProtKB/Swiss-Prot;Acc:Q9LZS0]
	AT1G02860	AT1G02475	AT1G01320		AT5G51190			AT2G22540	MADS-box protein SHORT VEGETATIVE PHASE SVP [Source:UniProtKB/Swiss-Prot;Acc:Q9FVC1]
	AT1G03630	AT1G11120	AT1G01480		AT3G47650			AT1G31320	LOB domain-containing protein 4 - LBD4 [Source:UniProtKB/Swiss-Prot;Acc:Q9SHE9]
	AT1G04240	AT1G12330	AT1G01640		AT5G63980			AT2G47520	Ethylene-responsive transcription factor ERF071 [Source:UniProtKB/Swiss-Prot;Acc:O22259]
	AT1G05460	AT1G15820	AT1G01970		AT3G50700			AT4G29080	Auxin-responsive protein IAA27 [Source:UniProtKB/Swiss-Prot;Acc:Q9ZSY8]
	AT1G07090	AT1G17650	AT1G02400		AT1G02730			AT3G16770	Ethylene-responsive transcription factor RAP2-3 [Source:UniProtKB/Swiss-Prot;Acc:P42736]
	AT1G09340	AT1G21680	AT1G02450		AT5G13810			AT4G35550	WUSCHEL RELATED HOMEOBOX 13 - WOX13
	AT1G09415	AT1G23220	AT1G02475		AT1G61340			AT1G23380	KNOTTED1-LIKE HOMEOBOX GENE 6 - KNAT6*
	AT1G09570	AT1G29340	AT1G02730		AT5G67480			AT5G66770	GRAS family transcription factor SCARECROW-LIKE 4 - SCL4
	AT1G10650	AT1G46480	AT1G02860		AT4G39980			AT1G50420	GRAS family transcription factor SCARECROW-LIKE 3 - SCL3
	AT1G11120	AT1G48450	AT1G03600		AT3G58790			AT1G63100	GRAS family transcription factor SCARECROW-LIKE 28 - SCL28
	AT1G11840	AT1G53440	AT1G03630		AT1G73590			AT4G32730	ARABIDOPSIS THALIANA MYB DOMAIN PROTEIN 3R1 - MYB3R1
	AT1G12250	AT1G54780	AT1G04240		AT4G34160			AT2G47620	SWI/SNF complex subunit SWI3A [Source:UniProtKB/Swiss-Prot;Acc:Q8W475]
	AT1G12430	AT1G60000	AT1G04420		AT5G17170			AT5G16820	Heat stress transcription factor A-1b [Source:UniProtKB/Swiss-Prot;Acc:O81821]
	AT1G12780	AT1G60160	AT1G05190		AT1G27730			AT5G06080	LOB domain-containing protein 33 [Source:UniProtKB/Swiss-Prot;Acc:Q9LHS8]
	AT1G13700	AT1G60420	AT1G05460		AT1G68760			AT2G33310	Auxin-responsive protein IAA13 [Source:UniProtKB/Swiss-Prot;Acc:Q38831]
	AT1G14270	AT1G62280	AT1G05600		AT3G55470			AT2G34140	Cyclic dof factor 4 [Source:UniProtKB/Swiss-Prot;Acc:O22967]
	AT1G15340	AT1G64510	AT1G06420		AT4G24110			AT2G29660	Zinc finger (C2H2 type) family protein [Source:TAIR;Acc:AT2G29660]
	AT1G15820	AT1G66350	AT1G06520		AT4G15920			AT5G12330	Protein LATERAL ROOT PRIMORDIUM 1 [Source:UniProtKB/Swiss-Prot;Acc:Q94CK9]
	AT1G17100	AT1G68760	AT2G30570		AT1G49850			AT5G51190	Ethylene-responsive transcription factor ERF105 [Source:UniProtKB/Swiss-Prot;Acc:Q8VY90]
	AT1G17650	AT1G70520	AT1G07000		AT3G50820			AT5G03720	Heat stress transcription factor A-3 [Source:UniProtKB/Swiss-Prot;Acc:Q8GYY1]
	AT1G18060	AT1G73880	AT1G07090		AT1G15820			AT3G49690	Transcription factor RAX3 [Source:UniProtKB/Swiss-Prot;Acc:Q9M2Y9]
	AT1G18590	AT1G75280	AT1G07150		AT2G48010			AT3G23250	MYB domain protein 15 [Source:TAIR;Acc:AT3G23250]
	AT1G18670	AT1G76160	AT1G07430		AT1G80870			AT2G28510	Dof zinc finger protein DOF2.1 [Source:UniProtKB/Swiss-Prot;Acc:Q8LE43]
	AT1G19330	AT1G76650	AT3G50685		AT3G22810			AT2G46680	Homeobox-leucine zipper protein ATHB-7 [Source:UniProtKB/Swiss-Prot;Acc:P46897]
	AT1G19980	AT1G79460	AT1G08940		AT1G55510			AT1G16070	Tubby-like protein 8 [Source:UniProtKB/Swiss-Prot;Acc:Q9S9M8]
	AT1G20020	AT2G05940	AT1G09340		AT2G33770			AT3G50700	Protein indeterminate-domain 2 [Source:UniProtKB/Swiss-Prot;Acc:Q9SCQ6]
	AT1G20823	AT2G15050	AT1G09910		AT1G11840			AT5G02810	Two-component response regulator-like APRR7 [Source:UniProtKB/Swiss-Prot;Acc:Q93WK5]
	AT1G21410	AT2G17220	AT1G09950		AT1G19850			AT2G33620	AT-hook motif nuclear-localized protein 10 [Source:UniProtKB/Swiss-Prot;Acc:O22812]
	AT1G21680	AT2G27690	AT1G09570		AT5G21105			AT1G73760	RING/U-box superfamily protein [Source:TAIR;Acc:AT1G73760]
	AT1G22180	AT2G31160	AT1G10650		AT1G07090			AT1G49850	RING/U-box superfamily protein [Source:TAIR;Acc:AT1G49850]
	AT1G22510	AT2G36870	AT1G11120		AT4G28230			AT1G72650	TRF-like 6 [Source:TAIR;Acc:AT1G72650]
	AT1G23360	AT2G37660	AT1G11210		AT3G20500			AT1G11950	Transcription factor jumonji (jmjC) domain-containing protein [Source:TAIR;Acc:AT1G11950]
	AT1G23380	AT2G38970	AT1G61340		AT4G37930			AT5G67480	BTB/POZ and TAZ domain-containing protein 4 [Source:UniProtKB/Swiss-Prot;Acc:Q9FJX5]
	AT1G23390	AT2G41680	AT1G12900		AT5G24470			AT5G49520	Probable WRKY transcription factor 48 [Source:UniProtKB/Swiss-Prot;Acc:Q9FGZ4]
	AT1G24020	AT2G42760	AT1G12780		AT1G04420			AT3G56400	Probable WRKY transcription factor 70 [Source:UniProtKB/Swiss-Prot;Acc:Q9LY00]
	AT1G24330	AT2G43000	AT1G12610		AT4G03280			AT1G68360	C2H2 and C2HC zinc fingers superfamily protein [Source:TAIR;Acc:AT1G68360]
	AT1G24625	AT2G43030	AT1G12430		AT3G24430			AT2G47260	Probable WRKY transcription factor 23 [Source:UniProtKB/Swiss-Prot;Acc:O22900]
	AT1G28330	AT2G43560	AT1G12330		AT5G12330			AT5G24470	pseudo-response regulator 5 [Source:TAIR;Acc:AT5G24470]
	AT1G30610	AT3G07700	AT1G13710		AT1G46480			AT4G18880	Heat stress transcription factor A-4a [Source:UniProtKB/Swiss-Prot;Acc:O49403]
	AT1G31320	AT3G08030	AT1G13610		AT3G48520			AT5G65790	myb domain protein 68 [Source:TAIR;Acc:AT5G65790]
	AT1G31335	AT3G16770	AT1G15010		AT3G28340			AT2G35940	BEL1-like homeodomain protein 1 -BLH1 [Source:UniProtKB/Swiss-Prot;Acc:Q9SJ56]*
	AT1G31800	AT3G20015	AT1G15000		AT3G50830			AT3G07740	Transcriptional adapter ADA2a [Source:UniProtKB/Swiss-Prot;Acc:Q9SFD5]
	AT1G32630	AT3G22810	AT1G14890		AT5G65260			AT1G66350	DELLA protein RGL1 [Source:UniProtKB/Swiss-Prot;Acc:Q9C8Y3]
	AT1G33420	AT3G25130	AT1G14790		AT2G35940			AT4G36650	Plant-specific TFIIB-related protein [Source:TAIR;Acc:AT4G36650]
	AT1G35420	AT3G25290	AT1G14345		AT4G37750			AT2G41710	AP2-like ethylene-responsive transcription factor At2g41710 [Source:UniProtKB/Swiss-Prot;Acc:Q8GWK2]
	AT1G46480	AT3G25920	AT1G14270		AT3G20015			AT1G33060	NAC domain-containing protein 14 [Source:UniProtKB/Swiss-Prot;Acc:B5X570]
	AT1G48300	AT3G28850	AT1G14120		AT5G62350			AT4G17500	Ethylene-responsive transcription factor 1A [Source:UniProtKB/Swiss-Prot;Acc:O80337]
	AT1G48450	AT3G29670	AT1G15340		AT1G18060			AT1G19210	Ethylene-responsive transcription factor ERF017 [Source:UniProtKB/Swiss-Prot;Acc:Q84QC2]
	AT1G49850	AT3G50410	AT1G16070		AT3G17020			AT3G15210	Ethylene-responsive transcription factor 4 [Source:UniProtKB/Swiss-Prot;Acc:O80340]
	AT1G50420	AT3G51670	AT1G15980		AT5G06720			AT3G16720	RING-H2 finger protein ATL2 [Source:UniProtKB/Swiss-Prot;Acc:Q8L9T5]
	AT1G51110	AT3G53380	AT1G15820		AT2G39930			AT1G27730	Zinc finger protein ZAT10 [Source:UniProtKB/Swiss-Prot;Acc:Q96289]
	AT1G52150	AT3G53960	AT1G17040		AT3G07740			AT2G38470	Probable WRKY transcription factor 33 [Source:UniProtKB/Swiss-Prot;Acc:Q8S8P5]
	AT1G52220	AT3G56400	AT1G78960		AT2G39140			AT1G19850	Auxin response factor 5 - MP [Source:UniProtKB/Swiss-Prot;Acc:P93024]
	AT1G54780	AT3G56940	AT1G17930		AT1G68360			AT1G73590	ARABIDOPSIS THALIANA PIN-FORMED 1 - PIN1
	AT1G55260	AT3G57430	AT1G17830		AT1G73500			AT5G61480	PHLOEM INTERCALATED WITH XYLEM - PXY
	AT1G55510	AT3G59080	AT1G17750		AT2G34710			AT5G51350	MORE LATERAL GROWTH1 - MOL1
	AT1G55670	AT4G03210	AT1G17650		AT4G02290			AT5G65700	BARELY ANY MERISTEM 1 - BAM1
	AT1G56500	AT4G08950	AT1G17480		AT3G15360			AT2G34710	Homeobox-leucine zipper protein ATHB-14 [Source:UniProtKB/Swiss-Prot;Acc:O04291]
	AT1G58420	AT4G10390	AT1G17380		AT2G18500			AT5G60690	Homeobox-leucine zipper protein REVOLUTA [Source:UniProtKB/Swiss-Prot;Acc:Q9SE43]
	AT1G60000	AT4G12490	AT1G17220		AT4G39900			AT1G52150	Homeobox-leucine zipper protein ATHB-15 [Source:UniProtKB/Swiss-Prot;Acc:Q9ZU11]
	AT1G60420	AT4G15920	AT1G17140		AT4G35020			AT2G27230	Transcription factor LHW [Source:UniProtKB/Swiss-Prot;Acc:Q9XIN0]
	AT1G60870	AT4G17090	AT1G17100		AT2G16890			AT1G46480	WUSCHEL RELATED HOMEOBOX 4 - WOX4
	AT1G61520	AT4G17500	AT1G19600		AT1G17650			AT4G08150	Homeobox protein knotted-1-like 1 - KNAT1/BP [Source:UniProtKB/Swiss-Prot;Acc:P46639]
	AT1G62290	AT4G18480	AT1G19210		AT1G30610
	AT1G64100	AT4G25490	AT1G19050		AT1G76160			*: tuber regulators
	AT1G64720	AT4G28230	AT1G18730		AT2G31040
	AT1G67700	AT4G31500	AT1G18710		AT1G13700
	AT1G67740	AT4G31780	AT1G18590		AT1G14270
	AT1G67830	AT4G34160	AT1G18400		AT1G09310
	AT1G67910	AT4G35600	AT1G19850		AT4G32250
	AT1G67920	AT4G36040	AT1G21500		AT3G15110
	AT1G68010	AT4G37750	AT1G21440		AT4G29080
	AT1G68220	AT5G14450	AT1G20823		AT5G49520
	AT1G69230	AT5G14910	AT1G20700		AT4G03230
	AT1G69870	AT5G18660	AT1G20620		AT2G03090
	AT1G72180	AT5G24470	AT1G20490		AT1G35190
	AT1G72610	AT5G24670	AT1G22180		AT1G35420
	AT1G72650	AT5G26340	AT1G21680		AT2G27230
	AT1G73090	AT5G40250	AT1G22650		AT5G23890
	AT1G73760	AT5G41620	AT1G22690		AT3G62130
	AT1G74100	AT5G42310	AT1G22810		AT3G54630
	AT1G75350	AT5G44400	AT1G23710		AT3G14160
	AT1G75690	AT5G46050	AT1G23390		AT1G19330
	AT1G76160	AT5G47220	AT1G23380		AT1G64720
	AT1G76730	AT5G50130	AT1G70830		AT5G05940
	AT1G77280	AT5G52390	AT1G25470		AT4G31500
	AT1G78780	AT5G52970	AT1G26150		AT1G72650
	AT1G80870	AT5G53130	AT1G27730		AT5G14410
	AT2G02850	AT5G58600	AT1G27680		AT5G17990
	AT2G03090	AT5G59830	AT1G28370		AT4G12800
	AT2G03420	AT5G61660	AT1G28330		AT2G17220
	AT2G16700	AT5G63140	AT1G29340		AT1G12780
	AT2G17230	AT5G65700	AT1G30040		AT3G62910
	AT2G17840	AT1G01320	AT5G46470		AT5G60690
	AT2G20850	AT1G01970	AT1G30490		AT5G47550
	AT2G21280	AT1G02020	AT4G29750		AT5G11420
	AT2G22540	AT1G02450	AT1G31800		AT2G41540
	AT2G22650	AT1G02860	AT1G32060		AT1G75690
	AT2G26250	AT1G03820	AT1G32470		AT5G55530
	AT2G26500	AT1G04420	AT2G39310		AT5G54400
	AT2G28305	AT1G05460	AT1G33170		AT3G51780
	AT2G28800	AT1G05600	AT1G34260		AT2G36870
	AT2G28930	AT1G07090	AT5G44400		AT2G29630
	AT2G29650	AT1G07150	AT1G48600		AT3G55800
	AT2G29660	AT1G07880	AT5G18770		AT4G29060
	AT2G29670	AT1G07900	AT1G49720		AT3G08940
	AT2G30570	AT1G08980	AT1G49650		AT5G66770
	AT2G30860	AT1G09570	AT1G50420		AT1G23380
	AT2G31160	AT1G09910	AT1G50590		AT5G62980
	AT2G31820	AT1G09950	AT1G52230		AT1G68010
	AT2G32100	AT1G10650	AT1G52150		AT4G35730
	AT2G33620	AT1G11330	AT1G52400		AT1G09340
	AT2G33770	AT1G11580	AT1G52410		AT4G17500
	AT2G34460	AT1G11840	AT3G57390		AT2G31820
	AT2G34710	AT1G11950	AT3G15210		AT3G16770
	AT2G35940	AT1G12250	AT1G55670		AT4G21620
	AT2G36870	AT1G12430	AT4G39720		AT3G62260
	AT2G37210	AT1G12780	AT4G39550		AT3G46540
	AT2G37660	AT1G13700	AT4G39510		AT5G38020
	AT2G37710	AT1G13710	AT4G39320		AT4G36650
	AT2G38860	AT1G14270	AT4G38210		AT5G65790
	AT2G39140	AT1G14790	AT4G39900		AT5G51350
	AT2G39730	AT1G15000	AT4G39980		AT3G23250
	AT2G39930	AT1G15340	AT4G37300		AT5G50130
	AT2G41540	AT1G16060	AT4G37750		AT5G46330
	AT2G41680	AT1G17100	AT4G37780		AT1G17100
	AT2G41710	AT1G17220	AT4G37870		AT5G48800
	AT2G41890	AT1G17840	AT4G37970		AT3G08030
	AT2G42220	AT1G19210	AT4G35480		AT4G20170
	AT2G42610	AT1G19330	AT4G35550		AT1G11120
	AT2G42760	AT1G19600	AT4G35600		AT5G03720
	AT2G45340	AT1G19610	AT4G35730		AT1G02475
	AT2G45820	AT1G19850	AT4G36040		AT5G22510
	AT2G46680	AT1G19980	AT4G36260		AT4G39720
	AT2G47010	AT1G20020	AT4G36430		AT1G67340
	AT2G47520	AT1G21410	AT4G36610		AT4G37870
	AT2G47620	AT1G22180	AT4G36650		AT1G56500
	AT2G48010	AT1G22690	AT4G36670		AT2G42610
	AT3G01770	AT1G23380	AT4G34990		AT2G47520
	AT3G02800	AT1G23710	AT4G35020		AT4G29720
	AT3G03310	AT1G24020	AT4G33980		AT5G14450
	AT3G05510	AT1G24330	AT4G34160		AT5G54090
	AT3G06950	AT1G26150	AT4G34250		AT5G24670
	AT3G07740	AT1G27680	AT4G34390		AT2G27690
	AT3G08940	AT1G27730	AT4G33510		AT1G77280
	AT3G09390	AT1G28050	AT4G33300		AT4G35550
	AT3G12490	AT1G28330	AT4G33220		AT2G41710
	AT3G13175	AT1G30610	AT4G33010		AT3G59350
	AT3G14160	AT1G31320	AT4G32880		AT3G05510
	AT3G15210	AT1G31800	AT4G32800		AT5G63140
	AT3G15360	AT1G33060	AT4G32730		AT4G33220
	AT3G16520	AT1G33170	AT4G32340		AT5G01210
	AT3G16720	AT1G34260	AT4G31800		AT2G28305
	AT3G16770	AT1G35190	AT4G31780		AT4G20430
	AT3G17020	AT1G37130	AT4G31000		AT4G03210
	AT3G17930	AT1G49720	AT4G30430		AT5G17980
	AT3G22810	AT1G49850	AT4G29720		AT1G15000
	AT3G23250	AT1G50420	AT4G29420		AT3G21690
	AT3G24430	AT1G50450	AT4G29190		AT2G32480
	AT3G25130	AT1G51700	AT4G34400		AT3G57430
	AT3G25640	AT1G52150	AT4G29080		AT1G72180
	AT3G26740	AT1G53430	AT4G29060		AT5G08260
	AT3G26980	AT1G55510	AT4G28950		AT5G54930
	AT3G27200	AT1G55610	AT4G28750		AT1G67920
	AT3G45160	AT1G56150	AT4G28490		AT5G59830
	AT3G45970	AT1G56500	AT4G28430		AT5G24010
	AT3G47070	AT1G58420	AT4G23680		AT5G61210
	AT3G47650	AT1G60870	AT4G25620		AT5G20230
	AT3G50700	AT1G61260	AT4G18480		AT2G05940
	AT3G50820	AT1G61340	AT4G18880		AT5G46050
	AT3G50830	AT1G62360	AT4G18910		AT5G16010
	AT3G51780	AT1G62770	AT4G21680		AT1G08380
	AT3G51950	AT1G63100	AT4G21280		AT3G27540
	AT3G53380	AT1G64720	AT4G20830		AT3G23580
	AT3G53960	AT1G64890	AT4G20430		AT1G62770
	AT3G54820	AT1G67340	AT4G19810		AT3G26060
	AT3G54950	AT1G68010	AT4G19510		AT1G01970
	AT3G55800	AT1G68220	AT4G22780		AT1G01470
	AT3G56940	AT1G68360	AT4G21870		AT5G27270
	AT3G58530	AT1G70200	AT4G22270		AT1G60420
	AT3G58790	AT1G70510	AT4G22730		AT4G08850
	AT3G59350	AT1G71030	AT4G22890		AT3G06950
	AT3G59400	AT1G71450	AT4G23810		AT2G36570
	AT3G62130	AT1G72180	AT4G24110		AT2G16700
	AT3G62910	AT1G72250	AT4G24780		AT4G37300
	AT4G00300	AT1G72360	AT4G24970		AT4G33510
	AT4G01150	AT1G72520	AT1G73090		AT4G32730
	AT4G02550	AT1G72650	AT1G73130		AT5G02810
	AT4G02630	AT1G73500	AT1G73540		AT1G78780
	AT4G03210	AT1G73540	AT1G73590		AT1G72250
	AT4G03280	AT1G73590	AT4G25880		AT5G47910
	AT4G05180	AT1G74520	AT4G25910		AT1G21410
	AT4G08150	AT1G75900	AT4G26370		AT1G18590
	AT4G08850	AT1G76070	AT3G54050		AT2G29650
	AT4G08950	AT1G77280	AT4G27280		AT5G52970
	AT4G09010	AT1G77400	AT4G27440		AT4G24130
	AT4G09550	AT1G78290	AT4G28230		AT5G16030
	AT4G12350	AT1G78370	AT4G28250		AT1G24330
	AT4G12800	AT1G78780	AT4G16770		AT5G64040
	AT4G13830	AT1G79470	AT3G19470		AT1G74520
	AT4G15920	AT1G80870	AT4G15130		AT2G42220
	AT4G17090	AT2G02230	AT4G15120		AT1G14890
	AT4G19810	AT2G02850	AT4G14770		AT3G54950
	AT4G20170	AT2G03420	AT5G16960		AT5G65170
	AT4G21620	AT2G03530	AT5G17170		AT4G25960
	AT4G23810	AT2G16400	AT3G50930		AT2G41680
	AT4G24110	AT2G16700	AT3G51820		AT3G05640
	AT4G24970	AT2G17040	AT5G16030		AT5G16820
	AT4G25960	AT2G17120	AT5G16010		AT4G19810
	AT4G27280	AT2G17840	AT5G14960		AT3G59080
	AT4G28230	AT2G18210	AT5G14940		AT1G21680
	AT4G28950	AT2G18360	AT5G14910		AT1G11950
	AT4G29060	AT2G18470	AT5G14700		AT5G46110
	AT4G29080	AT2G18500	AT5G12270		AT1G75350
	AT4G29240	AT2G18700	AT5G13720		AT5G53130
	AT4G31780	AT2G18950	AT5G13400		AT1G12430
	AT4G31800	AT2G20850	AT5G13200		AT3G50930
	AT4G32250	AT2G21280	AT5G11420		AT1G19600
	AT4G32730	AT2G22500	AT5G11160		AT1G66350
	AT4G32880	AT2G22540	AT5G11070		AT3G58530
	AT4G33070	AT2G22650	AT5G10690		AT1G52230
	AT4G33220	AT2G24130	AT5G10180		AT5G61480
	AT4G33510	AT2G27230	AT5G09660		AT4G16770
	AT4G35020	AT2G27680	AT5G07920		AT1G22180
	AT4G36650	AT2G28120	AT5G07580		AT2G22540
	AT4G36830	AT2G28310	AT5G03270		AT3G03310
	AT4G37300	AT2G28510	AT5G02810		AT3G60190
	AT4G37870	AT2G28930	AT1G72520		AT5G05180
	AT4G37930	AT2G29340	AT1G72450		AT5G06080
	AT4G38160	AT2G29670	AT1G72250		AT2G17230
	AT4G38970	AT2G30470	AT1G70510		AT4G29750
	AT4G39900	AT2G31820	AT3G29670		AT4G27280
	AT5G01380	AT2G31980	AT5G52390		AT2G38470
	AT5G01500	AT2G32100	AT5G53130		AT1G23220
	AT5G01920	AT2G33310	AT5G20900		AT3G17930
	AT5G02160	AT2G33620	AT5G21105		AT1G73760
	AT5G02810	AT2G33770	AT5G17350		AT4G13670
	AT5G03380	AT2G33860	AT3G50380		AT1G50420
	AT5G03680	AT2G34140	AT3G50820		AT1G28330
	AT5G03720	AT2G34200	AT5G04760		AT1G48450
	AT5G10180	AT2G34710	AT5G01530		AT1G51110
	AT5G10750	AT2G34790	AT5G01500		AT1G11580
	AT5G11070	AT2G35930	AT5G01380		AT2G44830
	AT5G11420	AT2G35940	AT5G01210		AT3G56940
	AT5G12330	AT2G38470	AT5G52970		AT1G54780
	AT5G13000	AT2G39140	AT5G03380		AT2G34140
	AT5G13810	AT2G39220	AT5G03680		AT2G29660
	AT5G14410	AT2G39660	AT5G53570		AT2G42760
	AT5G14450	AT2G39730	AT5G54400		AT3G18080
	AT5G16820	AT2G39930	AT5G54290		AT1G12900
	AT5G16970	AT2G41460	AT5G54270		AT2G24130
	AT5G16990	AT2G41540	AT5G54090		AT1G02400
	AT5G17170	AT2G41640	AT5G53990		AT1G29340
	AT5G18170	AT2G41710	AT5G53830		AT2G47620
	AT5G20220	AT2G41720	AT5G55560		AT3G57030
	AT5G23120	AT2G42040	AT5G55180		AT3G25130
	AT5G23570	AT2G42610	AT5G57940		AT4G38970
	AT5G24470	AT2G44920	AT5G58200		AT2G38970
	AT5G27270	AT2G45100	AT5G58330		AT1G76070
	AT5G35735	AT2G46680	AT5G58500		AT3G03190
	AT5G40250	AT2G47260	AT5G59720		AT1G60000
	AT5G41620	AT2G47520	AT5G59830		AT4G36830
	AT5G41700	AT2G47620	AT5G60030		AT2G22650
	AT5G43980	AT2G48010	AT5G60690		AT2G32100
	AT5G47550	AT3G01480	AT5G22740		AT1G27680
	AT5G48490	AT3G03310	AT5G22630		AT4G09510
	AT5G50130	AT3G04550	AT5G22290		AT1G16070
	AT5G52970	AT3G04650	AT3G49690		AT2G41890
	AT5G53880	AT3G05510	AT3G48610		AT1G64405
	AT5G54090	AT3G05640	AT3G48690		AT5G10180
	AT5G54270	AT3G05880	AT4G02290		AT5G47850
	AT5G54400	AT3G06950	AT3G44890		AT1G52150
	AT5G54770	AT3G06980	AT4G02550		AT3G18680
	AT5G54930	AT3G07740	AT4G10030		AT5G11160
	AT5G55530	AT3G12080	AT4G10340		AT4G18910
	AT5G56590	AT3G12490	AT5G17850		AT5G40250
	AT5G56760	AT3G12520	AT5G17670		AT2G21280
	AT5G57560	AT3G12890	AT3G62910		AT1G12250
	AT5G58200	AT3G14160	AT5G19600		AT4G39640
	AT5G58330	AT3G15110	AT5G51130		AT3G53960
	AT5G59830	AT3G15210	AT5G50360		AT2G47260
	AT5G60690	AT3G15720	AT5G49630		AT3G56400
	AT5G61480	AT3G16720	AT1G66350		AT5G41620
	AT5G62350	AT3G17020	AT1G67110		AT2G18360
	AT5G62980	AT3G18080	AT1G67340		AT5G63450
	AT5G63320	AT3G18100	AT1G67810		AT2G37660
	AT5G64040	AT3G18680	AT1G67970		AT1G33060
	AT5G65170	AT3G19960	AT1G68360		AT5G14920
	AT5G65260	AT3G20500	AT1G68760		AT4G28250
	AT5G65790	AT3G21690	AT3G13175		AT2G26500
	AT5G66770	AT3G23250	AT1G69270		AT5G17350
	AT5G67480	AT3G23570	AT1G69230		AT3G15210
	AT1G01120	AT3G23580	AT1G69160		AT5G16000
	AT1G01200	AT3G23640	AT1G71030		AT5G56760
	AT1G01320	AT3G24660	AT1G71450		AT1G31320
	AT1G01470	AT3G27200	AT1G77280		AT3G27200
	AT1G02020	AT3G27400	AT1G74100		AT2G33620
	AT1G02400	AT3G28340	AT1G74520		AT5G16990
	AT1G02475	AT3G44260	AT1G75280		AT3G45970
	AT1G02730	AT3G45140	AT1G76160		AT1G75280
	AT1G03620	AT3G45970	AT1G75690		AT4G01150
	AT1G04420	AT3G46540	AT1G77400		AT1G30040
	AT1G05710	AT3G46920	AT1G80870		AT5G10690
	AT1G07900	AT3G47600	AT1G80640		AT5G14700
	AT1G08380	AT3G48520	AT4G00300		AT3G63140
	AT1G09310	AT3G48610	AT4G01390		AT5G59730
	AT1G11580	AT3G49690	AT4G01150		AT1G77400
	AT1G11950	AT3G50380	AT4G01090		AT2G26250
	AT1G12900	AT3G50700	AT1G66100		AT3G53380
	AT1G14790	AT3G50830	AT4G03070		AT5G10750
	AT1G14890	AT3G50930	AT4G03280		AT3G16520
	AT1G15000	AT3G51030	AT4G04890		AT5G19600
	AT1G16060	AT3G51780	AT4G12030		AT4G33300
	AT1G16070	AT3G51820	AT4G09510		AT2G26910
	AT1G17140	AT3G51950	AT4G09010		AT2G45340
	AT1G17830	AT3G53190	AT4G08950		AT2G46680
	AT1G17840	AT3G53620	AT4G08850		AT2G33310
	AT1G19210	AT3G54630	AT4G08150		AT4G29240
	AT1G19600	AT3G55470	AT2G47620		AT5G26670
	AT1G19850	AT3G57390	AT2G47630		AT3G53190
	AT1G22690	AT3G58530	AT2G20950		AT4G09010
	AT1G22990	AT3G58790	AT1G18870		AT3G51030
	AT1G23220	AT3G59340	AT2G47950		AT1G61260
	AT1G23710	AT3G59350	AT2G38470		AT3G23570
	AT1G27680	AT3G60190	AT2G37900		AT2G28930
	AT1G27730	AT3G62130	AT2G37710		AT1G19980
	AT1G29340	AT3G62150	AT2G46400		AT1G33170
	AT1G29950	AT3G62260	AT2G45210		AT5G50360
	AT1G30040	AT3G62910	AT2G43030		AT4G18880
	AT1G32080	AT4G02020	AT2G43800		AT1G72520
	AT1G33060	AT4G02290	AT2G41540		AT1G56580
	AT1G33170	AT4G02630	AT2G41680		AT2G29670
	AT1G35190	AT4G03230	AT2G42040		AT1G31800
	AT1G37130	AT4G05180	AT2G41460		AT5G40460
	AT1G50450	AT4G07400	AT2G39220		AT1G70520
	AT1G50590	AT4G08150	AT2G39730		AT5G56590
	AT1G52230	AT4G08850	AT2G36870		AT4G05180
	AT1G53440	AT4G09010	AT2G36570		AT5G03680
	AT1G55610	AT4G09510	AT2G35930		AT4G33070
	AT1G56580	AT4G10030	AT2G35940		AT5G14760
	AT1G57770	AT4G10340	AT2G34200		AT4G08150
	AT1G60470	AT4G11280	AT2G33620		AT1G20020
	AT1G61260	AT4G12470	AT2G33310		AT1G68220
	AT1G61340	AT4G13830	AT1G51805		AT4G22730
	AT1G61720	AT4G14440	AT2G31350		AT1G22690
	AT1G62770	AT4G14680	AT2G30860		AT3G45140
	AT1G63100	AT4G15110	AT2G30470		AT5G22740
	AT1G64405	AT4G15120	AT5G48800		AT1G15340
	AT1G66350	AT4G15130	AT5G50930		AT2G30570
	AT1G67340	AT4G15440	AT5G52010		AT4G13830
	AT1G68360	AT4G16770	AT5G53320		AT2G34510
	AT1G68470	AT4G16820	AT5G54930		AT1G79460
	AT1G68530	AT4G18880	AT5G55530		AT2G31160
	AT1G68760	AT4G18910	AT5G56160		AT1G23360
	AT1G69160	AT4G19810	AT5G56760		AT5G60540
	AT1G70520	AT4G20170	AT5G58150		AT3G23640
	AT1G70830	AT4G20930	AT5G58520		AT5G46700
	AT1G70890	AT4G21280	AT5G59730		AT1G02860
	AT1G72250	AT4G21750	AT5G64450		AT1G14790
	AT1G72520	AT4G21960	AT5G16000		AT1G55610
	AT1G73500	AT4G23030	AT5G13880		AT1G09570
	AT1G73590	AT4G24110	AT5G13810		AT2G28510
	AT1G73880	AT4G26200	AT5G40910		AT5G03380
	AT1G74520	AT4G27280	AT5G10750		AT2G01820
	AT1G74770	AT4G29060	AT5G44050		AT1G63100
	AT1G75280	AT4G29080	AT5G08260		AT2G40370
	AT1G75900	AT4G29190	AT5G06870		AT4G08950
	AT1G76070	AT4G29720	AT5G05200		AT1G23710
	AT1G77400	AT4G29750	AT5G05180		AT5G57940
	AT1G79460	AT4G32250	AT5G04950		AT5G23120
	AT1G80060	AT4G32730	AT5G01920		AT1G19210
	AT1G80640	AT4G33070	AT4G37800		AT3G51670
	AT2G01820	AT4G33300	AT4G38970		AT3G16170
	AT2G03530	AT4G33510	AT4G36830		AT5G23060
	AT2G05940	AT4G34090	AT5G66570		AT1G05460
	AT2G13840	AT4G34240	AT4G37150		AT3G47070
	AT2G16890	AT4G34390	AT4G34710		AT3G16720
	AT2G17220	AT4G34400	AT4G34230		AT3G12490
	AT2G18210	AT4G34410	AT4G34090		AT1G58420
	AT2G18360	AT4G35020	AT1G62290		AT5G58200
	AT2G18500	AT4G35550	AT4G29240		AT3G49690
	AT2G18950	AT4G35730	AT3G24430		AT4G17090
	AT2G21330	AT4G35980	AT4G28150		AT2G46820
	AT2G22880	AT4G36650	AT4G27800		AT1G73880
	AT2G24130	AT4G37380	AT4G26200		AT5G49630
	AT2G25270	AT4G37870	AT4G25960		AT5G58330
	AT2G26910	AT4G39330	AT4G25640		AT5G65700
	AT2G27060	AT4G39640	AT4G21760		AT3G51950
	AT2G27230	AT4G39720	AT4G21620		AT5G55250
	AT2G27690	AT4G39900	AT4G21750		AT2G41640
	AT2G28510	AT5G01210	AT4G18170		AT5G18310
	AT2G28570	AT5G02810	AT2G22650		AT2G39730
	AT2G29630	AT5G03380	AT4G17600		AT3G07700
	AT2G31040	AT5G03680	AT4G17760		AT2G17840
	AT2G32480	AT5G03720	AT4G16230		AT1G60870
	AT2G33310	AT5G04760	AT4G17090		AT1G69870
	AT2G33850	AT5G04810	AT4G15920		AT1G01320
	AT2G34140	AT5G05350	AT3G51670		AT4G31780
	AT2G34510	AT5G05940	AT3G51780		AT5G13000
	AT2G35260	AT5G06080	AT3G51950		AT1G10650
	AT2G35370	AT5G06720	AT4G38160		AT1G32080
	AT2G36570	AT5G06730	AT3G52400
	AT2G37900	AT5G07920	AT4G15440
	AT2G38470	AT5G08260	AT3G50830
	AT2G38970	AT5G08650	AT3G49670
	AT2G40370	AT5G10690	AT5G61420
	AT2G41640	AT5G10750	AT5G61480
	AT2G44830	AT5G11160	AT5G61660
	AT2G46820	AT5G11650	AT5G61210
	AT2G47260	AT5G12330	AT5G23890
	AT3G03190	AT5G13000	AT5G23580
	AT3G04220	AT5G13810	AT5G23120
	AT3G04290	AT5G14700	AT5G23060
	AT3G04940	AT5G16000	AT5G23010
	AT3G05640	AT5G16010	AT5G60890
	AT3G07700	AT5G16820	AT5G24470
	AT3G08030	AT5G16990	AT5G24420
	AT3G09070	AT5G17170	AT5G27270
	AT3G10080	AT5G17350	AT5G49520
	AT3G14060	AT5G17980	AT5G49530
	AT3G15110	AT5G17990	AT5G28490
	AT3G16140	AT5G18310	AT5G42310
	AT3G16170	AT5G18750	AT5G47910
	AT3G18080	AT5G19600	AT5G48220
	AT3G18680	AT5G22510	AT5G48590
	AT3G20015	AT5G22740	AT3G27690
	AT3G20500	AT5G23570	AT5G40460
	AT3G21090	AT5G23890	AT3G27540
	AT3G21690	AT5G24010	AT3G27400
	AT3G23570	AT5G25610	AT3G26980
	AT3G23580	AT5G27270	AT3G26650
	AT3G23640	AT5G27560	AT3G25920
	AT3G26060	AT5G38020	AT3G25870
	AT3G27540	AT5G40460	AT3G25730
	AT3G28340	AT5G46330	AT3G25640
	AT3G42725	AT5G47710	AT2G03090
	AT3G45140	AT5G47910	AT2G01610
	AT3G46540	AT5G48220	AT2G01820
	AT3G46920	AT5G48485	AT2G01180
	AT3G48520	AT5G48800	AT5G47710
	AT3G48690	AT5G49520	AT5G47550
	AT3G49690	AT5G49530	AT5G46700
	AT3G50410	AT5G49630	AT5G46110
	AT3G50930	AT5G50360	AT5G44720
	AT3G51030	AT5G51130	AT5G44000
	AT3G51670	AT5G51190	AT5G43980
	AT3G53190	AT5G51350	AT4G37380
	AT3G54630	AT5G51750	AT5G43780
	AT3G54640	AT5G52010	AT5G43760
	AT3G55470	AT5G53570	AT5G40150
	AT3G56400	AT5G54090	AT5G38020
	AT3G57030	AT5G54400	AT5G41460
	AT3G57430	AT5G54770	AT5G41620
	AT3G57450	AT5G54930	AT2G21280
	AT3G57530	AT5G55250	AT2G22540
	AT3G59080	AT5G55530	AT2G22500
	AT3G60190	AT5G56590	AT2G22430
	AT3G61670	AT5G56760	AT1G78490
	AT3G62150	AT5G57940	AT2G23030
	AT3G62260	AT5G58200	AT2G24270
	AT3G63140	AT5G58630	AT2G31790
	AT4G02290	AT5G59700	AT4G13670
	AT4G02360	AT5G59730	AT2G31820
	AT4G03230	AT5G60030	AT2G26190
	AT4G09510	AT5G60540	AT2G26250
	AT4G12490	AT5G60690	AT2G27230
	AT4G13670	AT5G61210	AT1G42470
	AT4G14060	AT5G61290	AT2G28120
	AT4G14770	AT5G61480	AT2G28310
	AT4G15090	AT5G62470	AT2G28510
	AT4G16770	AT5G62570	AT2G28800
	AT4G16820	AT5G62980	AT2G28930
	AT4G17500	AT5G63320	AT2G28950
	AT4G17760	AT5G63450	AT2G29660
	AT4G18880	AT5G63980	AT2G29670
	AT4G18910	AT5G65170	AT2G30840
	AT4G20430	AT5G65600	AT2G31040
	AT4G22730	AT5G65790	AT2G31160
	AT4G23030	AT5G66350	AT2G33770
	AT4G24130	AT5G66770	AT2G33820
	AT4G24510	AT5G67480	AT2G33860
	AT4G28250	AT1G01120	AT2G34140
	AT4G28460	AT1G02730	AT2G34460
	AT4G29720	AT1G03600	AT2G34710
	AT4G29750	AT1G03620	AT2G34790
	AT4G31500	AT1G08380	AT2G39660
	AT4G33300	AT1G09310	AT4G02850
	AT4G34160	AT1G09340	AT2G36990
	AT4G34710	AT1G12900	AT3G56140
	AT4G35550	AT1G14345	AT2G41010
	AT4G35730	AT1G14890	AT2G42220
	AT4G37750	AT1G15980	AT2G41890
	AT4G38210	AT1G16070	AT2G43560
	AT4G39330	AT1G17420	AT2G42760
	AT4G39640	AT1G18060	AT2G42610
	AT4G39720	AT1G18590	AT2G42360
	AT4G39980	AT1G18730	AT2G44830
	AT5G01210	AT1G21500	AT2G45340
	AT5G05180	AT1G23360	AT2G47260
	AT5G05300	AT1G29670	AT2G47190
	AT5G05320	AT1G30040	AT1G08210
	AT5G05940	AT1G31335	AT2G46820
	AT5G06080	AT1G32060	AT2G46510
	AT5G06720	AT1G32080	AT2G45820
	AT5G08260	AT1G32470	AT2G47770
	AT5G10690	AT1G33811	AT2G47910
	AT5G11160	AT1G34640	AT4G12800
	AT5G11300	AT1G35420	AT4G13770
	AT5G13200	AT1G42470	AT4G13830
	AT5G14700	AT1G42970	AT4G14440
	AT5G14760	AT1G44575	AT3G51890
	AT5G14920	AT1G51110	AT3G53380
	AT5G16000	AT1G52230	AT3G53620
	AT5G16010	AT1G56580	AT3G57780
	AT5G16030	AT1G57770	AT3G59060
	AT5G17350	AT1G60190	AT3G61310
	AT5G17850	AT1G60470	AT3G61380
	AT5G17980	AT1G64380	AT3G61820
	AT5G17990	AT1G64405	AT3G61890
	AT5G18310	AT1G67920	AT3G62260
	AT5G19600	AT1G68530	AT3G63140
	AT5G20230	AT1G68590	AT3G01480
	AT5G20630	AT1G68640	AT3G03190
	AT5G20900	AT1G69440	AT3G03310
	AT5G21105	AT1G69870	AT3G05120
	AT5G22510	AT1G73760	AT3G04940
	AT5G22740	AT1G74670	AT3G04630
	AT5G22860	AT1G74770	AT3G06980
	AT5G23060	AT1G75350	AT3G07540
	AT5G23890	AT1G75690	AT3G07700
	AT5G24010	AT1G77850	AT3G07740
	AT5G24670	AT2G01610	AT3G08940
	AT5G25610	AT2G01820	AT3G08030
	AT5G26670	AT2G03090	AT5G05300
	AT5G35790	AT2G05540	AT3G11020
	AT5G38020	AT2G16630	AT3G11840
	AT5G40460	AT2G16890	AT3G12080
	AT5G46050	AT2G17230	AT3G12700
	AT5G46110	AT2G20340	AT3G13380
	AT5G46330	AT2G21330	AT3G14160
	AT5G46700	AT2G22430	AT3G15110
	AT5G47850	AT2G24270	AT3G16530
	AT5G47910	AT2G26250	AT3G15360
	AT5G48800	AT2G26500	AT3G15720
	AT5G49520	AT2G26910	AT3G15840
	AT5G49630	AT2G28305	AT3G15850
	AT5G50360	AT2G29630	AT3G16140
	AT5G51190	AT2G29650	AT3G16170
	AT5G51350	AT2G29660	AT3G16370
	AT5G53130	AT2G30570	AT3G16520
	AT5G54500	AT2G31040	AT3G16720
	AT5G55250	AT2G32480	AT3G17020
	AT5G55560	AT2G34510	AT3G17250
	AT5G56780	AT2G35370	AT3G17680
	AT5G57130	AT2G36570	AT3G17930
	AT5G57940	AT2G36990	AT3G18100
	AT5G58520	AT2G37210	AT3G18680
	AT5G59730	AT2G40370	AT5G48485
	AT5G60540	AT2G41890	AT3G19710
	AT5G61210	AT2G42220	AT5G14760
	AT5G61420	AT2G42360	AT3G19960
	AT5G62940	AT2G42840	AT3G20015
	AT5G63140	AT2G44830	AT3G20500
	AT5G63450	AT2G45340	AT3G21690
	AT5G63980	AT2G46820	AT3G22190
	AT5G65700	AT2G47910	AT3G23250
		AT3G03190	AT4G14365
		AT3G04290	AT3G23570
		AT3G04860	AT3G23580
		AT3G08940	AT3G25130
		AT3G11840	AT2G05940
		AT3G12700	AT1G32080
		AT3G15360	AT1G31320
		AT3G15840	AT1G32630
		AT3G15850	AT1G34640
		AT3G16170	AT1G33811
		AT3G16370	AT1G33420
		AT3G16520	AT1G33060
		AT3G16660	AT1G35190
		AT3G16670	AT1G04550
		AT3G17930	AT1G08980
		AT3G21090	AT1G07880
		AT3G24430	AT1G09310
		AT3G26060	AT3G53190
		AT3G27540	AT3G26060
		AT3G30340	AT3G44720
		AT3G42725	AT3G47650
		AT3G47070	AT3G47960
		AT3G47650	AT1G11330
		AT3G50685	AT3G53960
		AT3G50820	AT3G54630
		AT3G53950	AT3G54640
		AT3G54050	AT3G54820
		AT3G54890	AT3G54890
		AT3G54950	AT3G54950
		AT3G55800	AT3G55040
		AT3G56810	AT3G55470
		AT3G57030	AT5G51350
		AT3G61870	AT3G55800
		AT3G62410	AT3G55840
		AT3G63140	AT3G56400
		AT4G01150	AT3G56810
		AT4G03280	AT3G57030
		AT4G04640	AT3G57430
		AT4G04890	AT3G57470
		AT4G05030	AT3G57530
		AT4G09550	AT3G58530
		AT4G11130	AT3G58690
		AT4G11880	AT3G58790
		AT4G12350	AT3G59350
		AT4G12480	AT3G59400
		AT4G12800	AT3G60190
		AT4G13670	AT3G61830
		AT4G20430	AT3G61870
		AT4G21620	AT3G62410
		AT4G21870	AT1G46480
		AT4G22730	AT5G11410
		AT4G22890	AT5G11510
		AT4G24130	AT1G48450
		AT4G24510	AT1G51700
		AT4G24780	AT1G12250
		AT4G25910	AT3G48520
		AT4G25960	AT5G65170
		AT4G26370	AT5G65260
		AT4G27800	AT5G65310
		AT4G28250	AT5G65700
		AT4G29240	AT5G65790
		AT4G32800	AT5G67480
		AT4G33010	AT2G18500
		AT4G33220	AT2G18360
		AT4G36670	AT2G17840
		AT4G36830	AT2G17150
		AT4G37300	AT2G17120
		AT4G37800	AT2G17040
		AT4G37930	AT2G16890
		AT4G38770	AT2G16700
		AT4G38970	AT2G16400
		AT4G39970	AT2G13840
		AT4G39980	AT5G63580
		AT5G05180	AT5G63980
		AT5G05320	AT5G64040
		AT5G10180	AT5G62350
		AT5G11420	AT5G62470
		AT5G13400	AT5G62570
		AT5G13720	AT5G62940
		AT5G14410	AT5G62980
		AT5G14760	AT5G63140
		AT5G14920	AT5G63450
		AT5G14940	AT3G24660
		AT5G16030	AT1G31580
		AT5G17670	AT2G04400
		AT5G18170	AT5G61810
		AT5G20230	AT3G21055
		AT5G20630	AT3G13650
		AT5G21105	AT3G12520
		AT5G22860	AT3G05510
		AT5G23060	AT3G06750
		AT5G23120	AT3G06950
		AT5G26670	AT3G09070
		AT5G40150	AT3G02840
		AT5G44000	AT3G02800
		AT5G45680	AT3G04650
		AT5G46110	AT3G01210
		AT5G46700	AT3G01830
		AT5G47550	AT3G02050
		AT5G47850	AT2G05520
		AT5G50250	AT3G01430
		AT5G54290	AT3G05640
		AT5G55180	AT3G10080
		AT5G58330	AT3G13880
		AT5G59310	AT3G12490
		AT5G62350	AT3G12200
		AT5G64040	AT3G14060
		AT5G65260	AT3G18080
		AT5G66570	AT3G16660
			AT3G22810
			AT3G23340
			AT3G23640
			AT1G61720
			AT1G61520
			AT1G60420
			AT1G60190
			AT1G60160
			AT1G59910
			AT1G18670
			AT1G56580
			AT1G75350
			AT5G48490
			AT3G26740
			AT3G27200
			AT2G03980
			AT5G47640
			AT1G13700
			AT5G45250
			AT5G45930
			AT2G20340
			AT2G18470
			AT2G17220
			AT2G15820
			AT2G39930
			AT1G23220
			AT4G33070
			AT1G20020
			AT1G19980
			AT5G47220
			AT3G51030
			AT3G50700
			AT3G50650
			AT3G49140
			AT3G46540
			AT3G47070
			AT2G25270
			AT2G24130
			AT2G22880
			AT2G19780
			AT5G66770
			AT5G66670
			AT5G66650
			AT5G66350
			AT2G27060
			AT2G27690
			AT2G29890
			AT2G29650
			AT2G29630
			AT2G28305
			AT2G30040
			AT2G31730
			AT2G32100
			AT2G32480
			AT2G33100
			AT2G34510
			AT2G35155
			AT2G35260
			AT2G37760
			AT2G38970
			AT2G39140
			AT2G44920
			AT2G44690
			AT2G43100
			AT2G41720
			AT2G41640
			AT5G56780
			AT2G47010
			AT2G46250
			AT2G46680
			AT2G47780
			AT3G61630
			AT3G53280
			AT3G53950
			AT3G56940
			AT3G57010
			AT1G79310
			AT3G62130
			AT1G69870
			AT1G70200
			AT3G45140
			AT1G78290
			AT1G78370
			AT1G72650
			AT1G76650
			AT1G76730
			AT1G74890
			AT1G74090
			AT1G73880
			AT1G73760
			AT1G58270
			AT1G73600
			AT1G73500
			AT1G72180
			AT5G24670
			AT1G68010
			AT1G67700
			AT1G67830
			AT1G74450
			AT1G76790
			AT1G77060
			AT1G67920
			AT5G17980
			AT5G17990
			AT5G18170
			AT5G04340
			AT5G03720
			AT5G06720
			AT5G06730
			AT5G11020
			AT5G11300
			AT5G11650
			AT5G12140
			AT5G12330
			AT5G13000
			AT5G14410
			AT5G14450
			AT5G14920
			AT5G16820
			AT5G16990
			AT5G18750
			AT5G06080
			AT5G05940
			AT5G05870
			AT5G05350
			AT5G05250
			AT5G04810
			AT5G20220
			AT5G20230
			AT5G22510
			AT5G22500
			AT5G60540
			AT5G01790
			AT5G01240
			AT5G02160
			AT1G03820
			AT1G11840
			AT1G11950
			AT1G17420
			AT1G18060
			AT1G19380
			AT1G20340
			AT1G21100
			AT1G21410
			AT1G22985
			AT1G23360
			AT1G24625
			AT1G24330
			AT1G28050
			AT1G29660
			AT1G29950
			AT4G37410
			AT4G39970
			AT4G38770
			AT4G39180
			AT4G25490
			AT4G29270
			AT1G64100
			AT4G32250
			AT4G22560
			AT4G20930
			AT4G20170
			AT4G17500
			AT1G49450
			AT1G49840
			AT1G49850
			AT1G44575
			AT1G42970
			AT2G26380
			AT1G11420
			AT5G35790
			AT1G48300
			AT1G55610
			AT1G55510
			AT1G79460
			AT1G79470
			AT1G77850
			AT1G68590
			AT1G68640
			AT1G68470
			AT1G68220
			AT5G58630
			AT5G58600
			AT5G57560
			AT5G55250
			AT5G54960
			AT4G02770
			AT4G04640
			AT5G49990
			AT4G09760
			AT4G11130
			AT4G11280
			AT4G05180
			AT4G03210
			AT3G46650
			AT4G02430
			AT4G02360
			AT4G02020
			AT2G16630
			AT2G18480
			AT2G18700
			AT5G01730
			AT3G25290
			AT1G64380
			AT1G64405
			AT1G64180
			AT1G64510
			AT1G64590
			AT1G63720
			AT1G63100
			AT1G62540
			AT1G62560
			AT1G62770
			AT5G26670
			AT3G30340
			AT5G47850
			AT5G27560
			AT3G28850
			AT3G28340
			AT1G64720
			AT5G46350
			AT5G46330
			AT5G46050
			AT5G45680
			AT5G45670
			AT1G57770
			AT1G58420
			AT1G60000
			AT5G66640
			AT1G61260
			AT2G26500
			AT3G63440
			AT5G35735
			AT3G54260
			AT4G31500
			AT5G61290
			AT2G37660
			AT1G01470
			AT5G66700
			AT4G00040
			AT2G40370
			AT3G59080
			AT4G12480
			AT2G25420
			AT2G33850
			AT5G39720
			AT2G43535
			AT3G61670
			AT5G24010
			AT3G59340
			AT1G35420
			AT2G38860
			AT2G43000
			AT4G24130
			AT1G06640
			AT1G16080
			AT1G51110
			AT1G19330
			AT1G67740
			AT4G34240
			AT1G70920
			ATCG00340
			AT4G10390
			AT5G08650
			AT4G37930
			AT4G39640
			AT2G48010
			AT5G59310
			AT2G02230
			AT2G26910
			AT4G14270
			AT4G34410
			AT1G11280
			AT2G29460
			AT2G47520
			AT3G16770
			AT1G53430
			AT1G08380
			AT3G04550
			AT3G22900
			AT2G17230
			AT2G41710
			AT2G46310
			AT3G44260
			AT5G18660
			AT5G40250
			AT5G18310
			AT5G10380
			AT1G64890
			AT1G76070
			AT1G66830
			AT1G69440
			AT1G78780
			AT4G03230
			AT1G62360
			AT1G56500
			AT1G60870
			AT1G70520
			AT5G56590
			AT1G61360
			AT1G11580
			AT5G51190
			AT1G29980
			AT1G30610
			AT5G50130
			AT1G54780
			AT5G57100
			AT3G45970
	*FC_1.5: Fold-Change of 1.5

## Sheet: Table_S3
	Supplementary Table 3. Gene ontology (GO) term functional analysis of 403 common DEGs analyzed by the STRING database
	BIOLOGICAL PROCESS, GO-terms significantly enriched
	#term ID	term description	observed gene count	background gene count	false discovery rate	matching proteins in your network (IDs)	matching proteins in your network (labels)
	GO:0050896	response to stimulus	145	5064	2.41e-13	AT1G01470.1,AT1G02400.1,AT1G02730.1,AT1G02860.1,AT1G05460.1,AT1G07090.1,AT1G09340.1,AT1G09570.1,AT1G11580.1,AT1G11840.6,AT1G14790.1,AT1G19210.1,AT1G19850.1,AT1G20020.1,AT1G21410.1,AT1G22690.1,AT1G27730.1,AT1G28330.5,AT1G29340.1,AT1G30040.1,AT1G32080.1,AT1G46480.1,AT1G50420.1,AT1G52230.1,AT1G56500.1,AT1G60420.1,AT1G61340.2,AT1G66350.1,AT1G68010.2,AT1G68360.1,AT1G68760.1,AT1G70520.1,AT1G72180.1,AT1…	ABCG32,ADR1-L1,APE2,AT1G19210,AT1G22690,AT1G56500,AT1G60420,AT1G68360,AT1G72180,AT1G75280,AT1G80870,AT2G01820,AT2G37660,AT2G41710,AT3G05640,AT3G07700,AT3G21690,AT3G59350,AT4G27280,AT4G33070,AT5G14920,AT5G16990,AT5G47550,AT5G51190,AT5G56590,AT5G58330,ATHB-7,ATL2,At4g39640,At5g46330,BAG4,BCB,BCS1,BLH1,BT4,CRB,CRK2,CSLD5,CSP41A,CT-BMY,CYCD3;1,CYP83B1,CYP94B1,CYP94B3,CYP94C1,CYSB,CaS,ChiC,DHS1,DL1E,D…
	GO:0042221	response to chemical	93	2654	3.41e-12	AT1G01470.1,AT1G02730.1,AT1G02860.1,AT1G09340.1,AT1G09570.1,AT1G11840.6,AT1G14790.1,AT1G19210.1,AT1G19850.1,AT1G20020.1,AT1G21410.1,AT1G22690.1,AT1G27730.1,AT1G28330.5,AT1G32080.1,AT1G50420.1,AT1G52230.1,AT1G60420.1,AT1G61340.2,AT1G66350.1,AT1G68010.2,AT1G68360.1,AT1G70520.1,AT1G72180.1,AT1G72520.1,AT1G73500.1,AT1G73590.1,AT1G74520.1,AT1G75280.1,AT1G79460.1,AT2G17840.1,AT2G26910.1,AT2G29630.2,AT2…	ABCG32,AT1G19210,AT1G22690,AT1G60420,AT1G68360,AT1G72180,AT1G75280,AT2G41710,AT3G05640,AT3G07700,AT3G21690,AT5G14920,AT5G51190,ATHB-7,ATL2,BCS1,BLH1,BT4,CRB,CRK2,CSLD5,CSP41A,CYCD3;1,CYSB,CaS,ChiC,DL1E,DYL1,EBP,ERD7,ERF-1,ERF4,ERF71,EXO,FBA2,FBS1,FNR2,GA2,GDH1,GLX1,GSTF11,HCF136,HOS3-1,HPR,HSFA3,HSFA4A,HVA22A,IAA13,IAA27,LAC5,LEA14,LHCB4.2,LOX2,LOX4,LRP1,LrgB,MKK9,MP,MYB15,MYB84,NIP1;2,NLA,NTRC,P…
	GO:0008152	metabolic process	219	9671	3.63e-12	AT1G01970.1,AT1G02400.1,AT1G02730.1,AT1G02860.1,AT1G07090.1,AT1G08380.1,AT1G09340.1,AT1G09570.1,AT1G11580.1,AT1G11840.6,AT1G12780.1,AT1G12900.1,AT1G13700.1,AT1G14790.1,AT1G15000.1,AT1G15340.1,AT1G17650.1,AT1G18590.1,AT1G19210.1,AT1G19850.1,AT1G20020.1,AT1G21410.1,AT1G23360.1,AT1G24330.1,AT1G27680.1,AT1G27730.1,AT1G29340.1,AT1G30040.1,AT1G30610.1,AT1G31800.1,AT1G32080.1,AT1G33060.2,AT1G33170.1,AT1…	AAE13,ADA2A,ANT,AO,APG3,APL2,APT5,ARASP,AT1G01970,AT1G19210,AT1G24330,AT1G33170,AT1G49850,AT1G56500,AT1G60420,AT1G63100,AT1G67340,AT1G68360,AT1G72180,AT1G75280,AT1G80870,AT2G01820,AT2G16890,AT2G24130,AT2G28510,AT2G33620,AT2G34140,AT2G36570,AT2G41710,AT2G41890,AT3G05640,AT3G07700,AT3G20015,AT3G51950,AT3G53190,AT3G53380,AT3G57030,AT3G59350,AT3G62260,AT4G03230,AT4G08850,AT4G20430,AT5G10690,AT5G14450…
	GO:0009987	cellular process	230	10581	2.9e-11	AT1G01970.1,AT1G02400.1,AT1G02730.1,AT1G02860.1,AT1G05460.1,AT1G07090.1,AT1G08380.1,AT1G09340.1,AT1G09570.1,AT1G11580.1,AT1G11840.6,AT1G12430.2,AT1G12780.1,AT1G12900.1,AT1G13700.1,AT1G14790.1,AT1G15000.1,AT1G15340.1,AT1G18590.1,AT1G19210.1,AT1G19850.1,AT1G20020.1,AT1G21410.1,AT1G22690.1,AT1G23360.1,AT1G24330.1,AT1G27680.1,AT1G27730.1,AT1G29340.1,AT1G30040.1,AT1G30610.1,AT1G31800.1,AT1G32080.1,AT1…	AAE13,ADA2A,ADF5,ANT,AO,APG3,APL2,APT5,ARASP,ARK3,AT1G01970,AT1G19210,AT1G22690,AT1G24330,AT1G49850,AT1G56500,AT1G60420,AT1G63100,AT1G67340,AT1G68360,AT1G72180,AT1G72250,AT1G80870,AT2G01820,AT2G24130,AT2G28510,AT2G31040,AT2G33620,AT2G34140,AT2G36570,AT2G41710,AT2G41890,AT3G05640,AT3G07700,AT3G51670,AT3G51950,AT3G53190,AT3G53380,AT3G54630,AT3G59350,AT3G62260,AT4G03230,AT4G08850,AT5G03380,AT5G10690…
	GO:0044237	cellular metabolic process	193	8432	2.25e-10	AT1G01970.1,AT1G02400.1,AT1G02730.1,AT1G02860.1,AT1G07090.1,AT1G08380.1,AT1G09340.1,AT1G09570.1,AT1G11580.1,AT1G11840.6,AT1G12780.1,AT1G12900.1,AT1G13700.1,AT1G14790.1,AT1G15000.1,AT1G15340.1,AT1G18590.1,AT1G19210.1,AT1G19850.1,AT1G20020.1,AT1G21410.1,AT1G23360.1,AT1G24330.1,AT1G27680.1,AT1G27730.1,AT1G29340.1,AT1G30040.1,AT1G30610.1,AT1G31800.1,AT1G32080.1,AT1G33060.2,AT1G46480.1,AT1G49850.1,AT1…	AAE13,ADA2A,ANT,AO,APG3,APL2,APT5,AT1G01970,AT1G19210,AT1G24330,AT1G49850,AT1G63100,AT1G67340,AT1G68360,AT1G72180,AT1G80870,AT2G01820,AT2G24130,AT2G28510,AT2G33620,AT2G34140,AT2G36570,AT2G41710,AT2G41890,AT3G05640,AT3G07700,AT3G51950,AT3G53190,AT3G53380,AT3G59350,AT3G62260,AT4G03230,AT4G08850,AT5G10690,AT5G24010,AT5G40250,AT5G48800,AT5G51190,AT5G58330,AT5G66770,ATHB-15,ATHB-7,ATL2,At4g39640,At5g1…
	GO:0010033	response to organic substance	63	1786	5.24e-08	AT1G02860.1,AT1G14790.1,AT1G19210.1,AT1G19850.1,AT1G20020.1,AT1G21410.1,AT1G22690.1,AT1G27730.1,AT1G28330.5,AT1G50420.1,AT1G52230.1,AT1G61340.2,AT1G66350.1,AT1G68360.1,AT1G72180.1,AT1G73500.1,AT1G73590.1,AT1G74520.1,AT1G79460.1,AT2G17840.1,AT2G29630.2,AT2G33310.2,AT2G35940.3,AT2G38470.1,AT2G39730.1,AT2G41710.3,AT2G46680.1,AT2G46820.1,AT2G47260.1,AT2G47520.1,AT3G08940.2,AT3G15210.1,AT3G15360.1,AT3…	AT1G19210,AT1G22690,AT1G68360,AT1G72180,AT2G41710,AT5G14920,AT5G51190,ATHB-7,ATL2,BCS1,BLH1,BT4,CSP41A,CYCD3;1,ChiC,DYL1,EBP,ERD7,ERF-1,ERF4,ERF71,EXO,FBA2,FBS1,FNR2,GA2,HCF136,HOS3-1,HSFA3,HSFA4A,HVA22A,IAA13,IAA27,LHCB4.2,LOX2,LRP1,MKK9,MP,MYB15,MYB84,NLA,PIN1,PSAH2,PSI-P,PTL,PTR3,RAC3,RCA,RDR1,RGL1,SAL1,SCL3,SKP2A,SNAP33,STZ,SWEET17,THIC,TRN2,TRX-M4,WRKY23,WRKY33,WRKY48,WRKY70
	GO:1901700	response to oxygen-containing compound	53	1398	1.35e-07	AT1G01470.1,AT1G02730.1,AT1G02860.1,AT1G09340.1,AT1G14790.1,AT1G22690.1,AT1G27730.1,AT1G28330.5,AT1G50420.1,AT1G61340.2,AT1G66350.1,AT1G68010.2,AT1G68360.1,AT1G70520.1,AT1G72180.1,AT1G72520.1,AT1G74520.1,AT1G79460.1,AT2G17840.1,AT2G35940.3,AT2G38470.1,AT2G39730.1,AT2G41680.1,AT2G46680.1,AT2G46820.1,AT3G05640.1,AT3G12490.2,AT3G15210.1,AT3G16720.1,AT3G16770.1,AT3G23250.1,AT3G45140.1,AT3G49690.1,AT3…	AT1G22690,AT1G68360,AT1G72180,AT3G05640,AT5G14920,AT5G51190,ATHB-7,ATL2,BCS1,BLH1,BT4,CRB,CRK2,CSLD5,CYCD3;1,CYSB,ChiC,DYL1,EBP,ERD7,ERF-1,ERF4,EXO,FBA2,FBS1,GA2,HOS3-1,HPR,HSFA3,HSFA4A,HVA22A,LEA14,LOX2,LOX4,MYB15,MYB84,NLA,NTRC,PSI-P,PTL,PTR3,RCA,RDR1,RGL1,SAL1,SCL3,SNAP33,STZ,SWEET17,TL29,WRKY33,WRKY48,WRKY70
	GO:0065007	biological regulation	126	5235	9.38e-07	AT1G02400.1,AT1G02860.1,AT1G05460.1,AT1G07090.1,AT1G09340.1,AT1G09570.1,AT1G11580.1,AT1G12430.2,AT1G14790.1,AT1G15340.1,AT1G19210.1,AT1G19850.1,AT1G21410.1,AT1G22690.1,AT1G23380.2,AT1G27730.1,AT1G30040.1,AT1G33060.2,AT1G46480.1,AT1G50420.1,AT1G52150.2,AT1G56500.1,AT1G60420.1,AT1G62770.1,AT1G63100.1,AT1G66350.1,AT1G68360.1,AT1G72180.1,AT1G73500.1,AT1G73590.1,AT1G79460.1,AT1G80870.1,AT2G01820.1,AT2…	ADA2A,ANT,APG3,ARK3,AT1G19210,AT1G22690,AT1G56500,AT1G60420,AT1G62770,AT1G63100,AT1G68360,AT1G72180,AT1G80870,AT2G01820,AT2G28510,AT2G33620,AT2G34140,AT2G41710,AT3G05640,AT3G07700,AT3G59350,AT5G03380,AT5G14920,AT5G40460,AT5G47550,AT5G51190,AT5G66770,ATHB-15,ATHB-7,At5g46330,BCB,BCS1,BLH1,BT4,CNGC1,CNGC5,CRB,CRD1,CSP41A,CYP83B1,CYP94B1,CYP94B3,CYSB,CaS,EBP,ERF-1,ERF4,ERF71,GA2,GA2OX2,GA2OX6,GSL12,…
	GO:0006950	response to stress	83	2932	1.05e-06	AT1G01470.1,AT1G02730.1,AT1G02860.1,AT1G05460.1,AT1G09340.1,AT1G11580.1,AT1G14790.1,AT1G20020.1,AT1G27730.1,AT1G29340.1,AT1G61340.2,AT1G68010.2,AT1G68760.1,AT1G70520.1,AT1G72180.1,AT1G72520.1,AT1G73500.1,AT1G74520.1,AT1G75280.1,AT2G05940.1,AT2G17220.1,AT2G17840.1,AT2G26250.1,AT2G27690.1,AT2G28930.1,AT2G33770.1,AT2G37660.1,AT2G38470.1,AT2G39730.1,AT2G41680.1,AT2G46680.1,AT2G47520.1,AT3G03190.1,AT3…	ADR1-L1,AT1G72180,AT1G75280,AT2G37660,AT3G05640,AT3G07700,AT4G33070,AT5G14920,AT5G16990,AT5G47550,AT5G56590,ATHB-7,ATL2,At4g39640,At5g46330,BAG4,BCB,BCS1,BT4,CRB,CRK2,CSLD5,CT-BMY,CYP83B1,CYP94B1,CYP94B3,CYP94C1,CYSB,ChiC,DHS1,DL1E,EBP,ERD7,ERF-1,ERF4,ERF71,FBS1,FNR2,GATL10,GDH1,GSTF11,HPR,HSF3,HSFA3,HSFA4A,HVA22A,KCS10,Kin3,LEA14,LOX2,LOX4,MKK9,MYB15,NIK1,NLA,NTRC,NUDX1,PA2,PCK1,PETC,PHO2,PK1B,P…
	GO:0009725	response to hormone	53	1502	1.05e-06	AT1G02860.1,AT1G14790.1,AT1G19210.1,AT1G19850.1,AT1G20020.1,AT1G21410.1,AT1G22690.1,AT1G27730.1,AT1G50420.1,AT1G52230.1,AT1G61340.2,AT1G66350.1,AT1G68360.1,AT1G73500.1,AT1G73590.1,AT1G74520.1,AT1G79460.1,AT2G17840.1,AT2G33310.2,AT2G35940.3,AT2G39730.1,AT2G41710.3,AT2G46680.1,AT2G46820.1,AT2G47260.1,AT2G47520.1,AT3G08940.2,AT3G15210.1,AT3G15360.1,AT3G16770.1,AT3G23250.1,AT3G45140.1,AT3G49690.1,AT3…	AT1G19210,AT1G22690,AT1G68360,AT2G41710,AT5G14920,AT5G51190,ATHB-7,BCS1,BLH1,BT4,CSP41A,CYCD3;1,ChiC,EBP,ERD7,ERF-1,ERF4,ERF71,EXO,FBA2,FBS1,FNR2,GA2,HCF136,HOS3-1,HVA22A,IAA13,IAA27,LHCB4.2,LOX2,LRP1,MKK9,MP,MYB15,MYB84,NLA,PIN1,PSAH2,PSI-P,PTR3,RAC3,RCA,RDR1,RGL1,SAL1,SCL3,SKP2A,SNAP33,STZ,TRN2,TRX-M4,WRKY23,WRKY70
	GO:0009628	response to abiotic stimulus	57	1699	1.33e-06	AT1G01470.1,AT1G02400.1,AT1G02730.1,AT1G07090.1,AT1G09340.1,AT1G09570.1,AT1G27730.1,AT1G30040.1,AT1G56500.1,AT1G61340.2,AT1G68010.2,AT1G72180.1,AT1G73500.1,AT1G73590.1,AT1G74520.1,AT2G17840.1,AT2G22540.1,AT2G26250.1,AT2G29650.1,AT2G31160.1,AT2G35940.3,AT2G38470.1,AT2G39730.1,AT2G42610.1,AT2G46680.1,AT2G47520.1,AT3G05640.1,AT3G08940.2,AT3G12490.2,AT3G16770.1,AT3G23250.1,AT3G50820.1,AT3G50930.1,AT3…	APE2,AT1G56500,AT1G72180,AT3G05640,AT4G27280,AT4G33070,AT5G14920,AT5G47550,ATHB-7,BAG4,BCB,BCS1,BLH1,BT4,CRB,CSLD5,CT-BMY,CYP83B1,CYSB,CaS,ChiC,EBP,ERD7,ERF71,FBS1,GA2OX2,GA2OX6,GDH1,HPR,HSF3,HSFA3,HVA22A,KCS10,LEA14,LHCB4.2,LSH10,LSH3,LSH6,MKK9,MYB15,PETC,PHT4;1,PHYA,PIN1,PRR7,PSBO2,PTAC5,PTR3,RAC3,RBOHD,RCA,SHM1,SNAP33,STZ,SVP,SWEET17,WRKY33
	GO:0015979	photosynthesis	18	215	1.33e-06	AT1G08380.1,AT1G12900.1,AT1G20020.1,AT1G27730.1,AT1G52230.1,AT1G54780.1,AT1G75690.1,AT2G30570.1,AT2G46820.1,AT3G08940.2,AT3G50820.1,AT3G55800.1,AT3G56940.1,AT4G03280.1,AT4G05180.1,AT4G12800.1,AT5G23120.1,AT5G64040.2	CRD1,FNR2,GAPA-2,HCF136,LHCB4.2,LQY1,PETC,PSAH2,PSAL,PSAN,PSAO,PSBO2,PSBQ-2,PSBW,PSI-P,SBPASE,STZ,TLP18.3
	GO:0009058	biosynthetic process	106	4258	2.78e-06	AT1G02400.1,AT1G02730.1,AT1G02860.1,AT1G07090.1,AT1G09340.1,AT1G09570.1,AT1G12780.1,AT1G12900.1,AT1G14790.1,AT1G15340.1,AT1G18590.1,AT1G19210.1,AT1G19850.1,AT1G23360.1,AT1G27680.1,AT1G27730.1,AT1G30040.1,AT1G31800.1,AT1G33060.2,AT1G46480.1,AT1G50420.1,AT1G52150.2,AT1G63100.1,AT1G66350.1,AT1G68360.1,AT1G68760.1,AT1G72520.1,AT1G73500.1,AT1G75350.1,AT1G79460.1,AT2G18500.1,AT2G22540.1,AT2G26250.1,AT2…	AAE13,ADA2A,ANT,AO,APG3,APL2,APT5,AT1G19210,AT1G63100,AT1G68360,AT2G28510,AT2G33620,AT2G34140,AT2G41710,AT3G07700,AT3G57030,AT5G51190,AT5G66770,ATHB-15,ATHB-7,At5g17990,BLH1,CRB,CRD1,CSLA02,CSLD5,CSP41A,CT-BMY,CYP83B1,CYP97A3,DHS1,DHS2,EBP,ERF-1,ERF4,ERF71,FBA2,FOLB2,GA2,GA2OX2,GA2OX6,GAPA-2,GATL10,GAUT15,GSL12,HOS3-1,HSF3,HSFA3,HSFA4A,IAA13,IAA27,IDD2,ISA1,KCS10,LHW,LOG1,LOX2,LOX4,LRP1,LSH10,LSH…
	GO:0009605	response to external stimulus	50	1431	2.78e-06	AT1G01470.1,AT1G02860.1,AT1G05460.1,AT1G09340.1,AT1G09570.1,AT1G11580.1,AT1G14790.1,AT1G20020.1,AT1G29340.1,AT1G60420.1,AT1G61340.2,AT1G68010.2,AT1G72180.1,AT1G72520.1,AT1G73500.1,AT1G73590.1,AT2G05940.1,AT2G29630.2,AT2G29650.1,AT2G33770.1,AT2G35940.3,AT2G37660.1,AT2G38470.1,AT2G39730.1,AT2G47260.1,AT3G07700.3,AT3G15210.1,AT3G16770.1,AT3G45140.1,AT3G48520.1,AT3G50930.1,AT3G54950.1,AT3G55800.1,AT3…	ADR1-L1,AT1G60420,AT1G72180,AT2G37660,AT3G07700,At5g46330,BCB,BCS1,BLH1,CRB,CYP83B1,CYP94B3,DL1E,EBP,ERF4,FBS1,FNR2,HPR,LEA14,LOX2,LOX4,MKK9,NIK1,NLA,PA2,PCK1,PETC,PHO2,PHT4;1,PHYA,PIN1,PLP7,PME44,PMEPCRA,PTR3,PUB17,RAC3,RBOHD,RCA,RDR1,RIPK,SBPASE,SDE3,SNAP33,SWEET17,THIC,WRKY23,WRKY33,WRKY48,WRKY70
	GO:0071704	organic substance metabolic process	180	8632	2.78e-06	AT1G01970.1,AT1G02400.1,AT1G02730.1,AT1G02860.1,AT1G07090.1,AT1G09340.1,AT1G09570.1,AT1G11580.1,AT1G11840.6,AT1G12780.1,AT1G12900.1,AT1G13700.1,AT1G14790.1,AT1G15000.1,AT1G15340.1,AT1G18590.1,AT1G19210.1,AT1G19850.1,AT1G21410.1,AT1G23360.1,AT1G24330.1,AT1G27680.1,AT1G27730.1,AT1G29340.1,AT1G30040.1,AT1G30610.1,AT1G31800.1,AT1G33060.2,AT1G46480.1,AT1G49850.1,AT1G50420.1,AT1G52150.2,AT1G54780.1,AT1…	AAE13,ADA2A,ANT,AO,APG3,APL2,APT5,ARASP,AT1G01970,AT1G19210,AT1G24330,AT1G49850,AT1G63100,AT1G67340,AT1G68360,AT1G72180,AT1G80870,AT2G01820,AT2G24130,AT2G28510,AT2G33620,AT2G34140,AT2G36570,AT2G41710,AT2G41890,AT3G05640,AT3G07700,AT3G20015,AT3G51950,AT3G53190,AT3G53380,AT3G59350,AT3G62260,AT4G03230,AT4G08850,AT4G20430,AT5G10690,AT5G14450,AT5G24010,AT5G40250,AT5G48800,AT5G51190,AT5G56590,AT5G58330…
	GO:0009416	response to light stimulus	29	585	2.81e-06	AT1G01470.1,AT1G02400.1,AT1G07090.1,AT1G09570.1,AT1G27730.1,AT1G30040.1,AT1G56500.1,AT1G68010.2,AT1G73590.1,AT2G17840.1,AT2G26250.1,AT2G29650.1,AT2G31160.1,AT2G35940.3,AT2G39730.1,AT2G42610.1,AT3G08940.2,AT3G50820.1,AT3G50930.1,AT4G03280.1,AT4G13670.1,AT4G15920.1,AT4G31500.1,AT4G37930.1,AT5G02810.1,AT5G18170.1,AT5G20230.1,AT5G23060.1,AT5G46110.4	APE2,AT1G56500,BCB,BCS1,BLH1,CYP83B1,CaS,ERD7,GA2OX2,GA2OX6,GDH1,HPR,KCS10,LEA14,LHCB4.2,LSH10,LSH3,LSH6,PETC,PHT4;1,PHYA,PIN1,PRR7,PSBO2,PTAC5,RCA,SHM1,STZ,SWEET17
	GO:0044249	cellular biosynthetic process	101	4013	3.13e-06	AT1G02400.1,AT1G02730.1,AT1G02860.1,AT1G07090.1,AT1G09340.1,AT1G09570.1,AT1G12780.1,AT1G14790.1,AT1G15340.1,AT1G18590.1,AT1G19210.1,AT1G19850.1,AT1G23360.1,AT1G27680.1,AT1G27730.1,AT1G30040.1,AT1G31800.1,AT1G33060.2,AT1G46480.1,AT1G50420.1,AT1G52150.2,AT1G63100.1,AT1G66350.1,AT1G68360.1,AT1G68760.1,AT1G72520.1,AT1G73500.1,AT1G75350.1,AT1G79460.1,AT2G18500.1,AT2G22540.1,AT2G26250.1,AT2G27230.2,AT2…	AAE13,ADA2A,ANT,AO,APG3,APL2,APT5,AT1G19210,AT1G63100,AT1G68360,AT2G28510,AT2G33620,AT2G34140,AT2G41710,AT3G07700,AT5G51190,AT5G66770,ATHB-15,ATHB-7,At5g17990,BLH1,CRB,CRD1,CSLA02,CSLD5,CSP41A,CT-BMY,CYP83B1,CYP97A3,DHS1,DHS2,EBP,ERF-1,ERF4,ERF71,FBA2,FOLB2,GA2,GA2OX2,GA2OX6,GSL12,HOS3-1,HSF3,HSFA3,HSFA4A,IAA13,IAA27,IDD2,ISA1,KCS10,LHW,LOG1,LOX2,LOX4,LRP1,LSH10,LSH3,LSH6,MBD10,MENG,MGD1,MKK9,MP,…
	GO:1901576	organic substance biosynthetic process	102	4083	3.58e-06	AT1G02400.1,AT1G02730.1,AT1G02860.1,AT1G07090.1,AT1G09340.1,AT1G09570.1,AT1G12780.1,AT1G12900.1,AT1G14790.1,AT1G15340.1,AT1G18590.1,AT1G19210.1,AT1G19850.1,AT1G23360.1,AT1G27680.1,AT1G27730.1,AT1G30040.1,AT1G31800.1,AT1G33060.2,AT1G46480.1,AT1G50420.1,AT1G52150.2,AT1G63100.1,AT1G66350.1,AT1G68360.1,AT1G68760.1,AT1G72520.1,AT1G73500.1,AT1G75350.1,AT1G79460.1,AT2G18500.1,AT2G22540.1,AT2G26250.1,AT2…	AAE13,ADA2A,ANT,AO,APG3,APL2,APT5,AT1G19210,AT1G63100,AT1G68360,AT2G28510,AT2G33620,AT2G34140,AT2G41710,AT3G07700,AT5G51190,AT5G66770,ATHB-15,ATHB-7,At5g17990,BLH1,CRB,CRD1,CSLD5,CSP41A,CT-BMY,CYP83B1,CYP97A3,DHS1,DHS2,EBP,ERF-1,ERF4,ERF71,FBA2,FOLB2,GA2,GA2OX2,GA2OX6,GAPA-2,GATL10,GAUT15,GSL12,HOS3-1,HSF3,HSFA3,HSFA4A,IAA13,IAA27,IDD2,ISA1,KCS10,LHW,LOX2,LOX4,LSH10,LSH3,LSH6,MBD10,MENG,MGD1,MKK9…
	GO:0019438	aromatic compound biosynthetic process	72	2510	3.61e-06	AT1G02860.1,AT1G07090.1,AT1G09570.1,AT1G12780.1,AT1G14790.1,AT1G15340.1,AT1G19210.1,AT1G19850.1,AT1G27730.1,AT1G33060.2,AT1G46480.1,AT1G50420.1,AT1G52150.2,AT1G63100.1,AT1G66350.1,AT1G68360.1,AT1G68760.1,AT1G73500.1,AT2G18500.1,AT2G22540.1,AT2G27230.2,AT2G28510.1,AT2G29630.2,AT2G31160.1,AT2G32100.1,AT2G33310.2,AT2G33620.2,AT2G34140.1,AT2G34710.1,AT2G35940.3,AT2G38470.1,AT2G41710.3,AT2G42610.1,AT2…	ADA2A,ANT,AO,APT5,AT1G19210,AT1G63100,AT1G68360,AT2G28510,AT2G33620,AT2G34140,AT2G41710,AT5G51190,AT5G66770,ATHB-15,ATHB-7,At5g17990,BLH1,CRD1,CYP83B1,DHS1,DHS2,EBP,ERF-1,ERF4,ERF71,FBA2,FOLB2,HSF3,HSFA3,HSFA4A,IAA13,IAA27,IDD2,LHW,LSH10,LSH3,LSH6,MBD10,MKK9,MP,MYB15,MYB84,NAC014,NLA,NUDX1,OFP16,OFP7,PBRP,PC-MYB1,PDX2,PHB,PHYA,PRR5,PRR7,PTAC5,PTL,RDR1,REV,RGL1,RNR2A,SCL3,STZ,SVP,SWI3A,THIC,UGE1,W…
	GO:0050789	regulation of biological process	111	4623	5.22e-06	AT1G02860.1,AT1G05460.1,AT1G07090.1,AT1G09340.1,AT1G09570.1,AT1G11580.1,AT1G12430.2,AT1G14790.1,AT1G15340.1,AT1G19210.1,AT1G19850.1,AT1G21410.1,AT1G22690.1,AT1G23380.2,AT1G27730.1,AT1G33060.2,AT1G46480.1,AT1G50420.1,AT1G52150.2,AT1G56500.1,AT1G60420.1,AT1G63100.1,AT1G66350.1,AT1G68360.1,AT1G72180.1,AT1G73500.1,AT1G73590.1,AT1G79460.1,AT1G80870.1,AT2G01820.1,AT2G05940.1,AT2G17220.1,AT2G18500.1,AT2…	ADA2A,ANT,APG3,ARK3,AT1G19210,AT1G22690,AT1G56500,AT1G60420,AT1G63100,AT1G68360,AT1G72180,AT1G80870,AT2G01820,AT2G28510,AT2G33620,AT2G34140,AT2G41710,AT3G05640,AT3G07700,AT3G59350,AT5G14920,AT5G40460,AT5G47550,AT5G51190,AT5G66770,ATHB-15,ATHB-7,At5g46330,BCB,BCS1,BLH1,BT4,CRB,CRD1,CSP41A,CYP83B1,CYSB,CaS,EBP,ERF-1,ERF4,ERF71,GA2,GSL12,HSF3,HSFA3,HSFA4A,IAA13,IAA27,IDD2,J20,KNAT1,KNAT6,Kin3,LHW,LR…
	GO:0050794	regulation of cellular process	102	4167	8.02e-06	AT1G02860.1,AT1G07090.1,AT1G09340.1,AT1G09570.1,AT1G11580.1,AT1G12430.2,AT1G14790.1,AT1G15340.1,AT1G19210.1,AT1G19850.1,AT1G21410.1,AT1G22690.1,AT1G23380.2,AT1G27730.1,AT1G33060.2,AT1G46480.1,AT1G50420.1,AT1G52150.2,AT1G56500.1,AT1G60420.1,AT1G63100.1,AT1G66350.1,AT1G68360.1,AT1G72180.1,AT1G73500.1,AT1G73590.1,AT1G79460.1,AT1G80870.1,AT2G01820.1,AT2G05940.1,AT2G17220.1,AT2G18500.1,AT2G22540.1,AT2…	ADA2A,ANT,ARK3,AT1G19210,AT1G22690,AT1G56500,AT1G60420,AT1G63100,AT1G68360,AT1G72180,AT1G80870,AT2G01820,AT2G28510,AT2G33620,AT2G34140,AT2G41710,AT3G59350,AT5G14920,AT5G40460,AT5G47550,AT5G51190,AT5G66770,ATHB-15,ATHB-7,At5g46330,BCB,BCS1,BLH1,BT4,CRB,CRD1,CSP41A,CYSB,CaS,EBP,ERF-1,ERF4,ERF71,GA2,GSL12,HSF3,HSFA3,HSFA4A,IAA13,IAA27,IDD2,J20,KNAT1,KNAT6,Kin3,LHW,LRP1,LSH10,LSH3,LSH6,MBD10,MKK9,MP,…
	GO:0009617	response to bacterium	22	385	9.76e-06	AT1G02860.1,AT1G09340.1,AT1G11580.1,AT1G20020.1,AT1G61340.2,AT1G72520.1,AT2G05940.1,AT2G37660.1,AT2G38470.1,AT2G39730.1,AT3G15210.1,AT3G45140.1,AT3G50930.1,AT3G55800.1,AT3G56400.1,AT4G03280.1,AT4G31500.1,AT4G33220.1,AT4G33300.2,AT5G46050.1,AT5G46330.1,AT5G49520.1	ADR1-L1,AT2G37660,At5g46330,BCS1,CRB,CYP83B1,ERF4,FBS1,FNR2,LOX2,LOX4,NLA,PETC,PME44,PMEPCRA,PTR3,RCA,RIPK,SBPASE,WRKY33,WRKY48,WRKY70
	GO:0051707	response to other organism	40	1079	1e-05	AT1G01470.1,AT1G02860.1,AT1G05460.1,AT1G09340.1,AT1G11580.1,AT1G14790.1,AT1G20020.1,AT1G29340.1,AT1G61340.2,AT1G72520.1,AT1G73500.1,AT2G05940.1,AT2G29650.1,AT2G35940.3,AT2G37660.1,AT2G38470.1,AT2G39730.1,AT2G47260.1,AT3G15210.1,AT3G16770.1,AT3G45140.1,AT3G48520.1,AT3G50930.1,AT3G54950.1,AT3G55800.1,AT3G56400.1,AT3G60190.1,AT4G03280.1,AT4G31500.1,AT4G33220.1,AT4G33300.2,AT4G37870.1,AT5G06720.1,AT5…	ADR1-L1,AT2G37660,At5g46330,BCB,BCS1,BLH1,CRB,CYP83B1,CYP94B3,DL1E,EBP,ERF4,FBS1,FNR2,LEA14,LOX2,LOX4,MKK9,NIK1,NLA,PA2,PCK1,PETC,PHT4;1,PLP7,PME44,PMEPCRA,PTR3,PUB17,RBOHD,RCA,RDR1,RIPK,SBPASE,SDE3,SNAP33,WRKY23,WRKY33,WRKY48,WRKY70
	GO:0018130	heterocycle biosynthetic process	69	2462	1.25e-05	AT1G07090.1,AT1G09570.1,AT1G12780.1,AT1G14790.1,AT1G15340.1,AT1G19210.1,AT1G19850.1,AT1G27730.1,AT1G33060.2,AT1G46480.1,AT1G50420.1,AT1G52150.2,AT1G63100.1,AT1G66350.1,AT1G68360.1,AT1G68760.1,AT1G73500.1,AT2G18500.1,AT2G22540.1,AT2G27230.2,AT2G28510.1,AT2G29630.2,AT2G31160.1,AT2G32100.1,AT2G33310.2,AT2G33620.2,AT2G34140.1,AT2G34710.1,AT2G35940.3,AT2G38470.1,AT2G41710.3,AT2G42610.1,AT2G46680.1,AT2…	ADA2A,ANT,AO,APT5,AT1G19210,AT1G63100,AT1G68360,AT2G28510,AT2G33620,AT2G34140,AT2G41710,AT5G51190,AT5G66770,ATHB-15,ATHB-7,At5g17990,BLH1,CRD1,CYP83B1,EBP,ERF-1,ERF4,ERF71,FBA2,FOLB2,HSF3,HSFA3,HSFA4A,IAA13,IAA27,IDD2,LHW,LSH10,LSH3,LSH6,MBD10,MKK9,MP,MYB15,MYB84,NAC014,NUDX1,OFP16,OFP7,PBRP,PC-MYB1,PDX2,PHB,PHYA,PRR5,PRR7,PTAC5,PTL,RDR1,REV,RGL1,RNR2A,SCL3,STZ,SVP,SWI3A,THIC,UGE1,WOX13,WOX4,WRKY…
	GO:0042493	response to drug	26	533	1.25e-05	AT1G02860.1,AT1G14790.1,AT1G27730.1,AT1G32080.1,AT1G61340.2,AT1G70520.1,AT1G72520.1,AT2G26910.1,AT2G29630.2,AT2G38470.1,AT3G15210.1,AT3G16720.1,AT3G21690.1,AT3G23250.1,AT3G49690.1,AT3G50930.1,AT3G56400.1,AT4G17500.1,AT4G18880.1,AT4G18910.1,AT5G03680.1,AT5G03720.1,AT5G46050.1,AT5G49520.1,AT5G51190.1,AT5G67480.2	ABCG32,AT3G21690,AT5G51190,ATL2,BCS1,BT4,CRK2,ERF-1,ERF4,FBS1,HSFA3,HSFA4A,LOX4,LrgB,MYB15,MYB84,NIP1;2,NLA,PTL,PTR3,RDR1,STZ,THIC,WRKY33,WRKY48,WRKY70
	GO:1901362	organic cyclic compound biosynthetic process	72	2614	1.25e-05	AT1G02860.1,AT1G07090.1,AT1G09570.1,AT1G12780.1,AT1G14790.1,AT1G15340.1,AT1G19210.1,AT1G19850.1,AT1G27730.1,AT1G33060.2,AT1G46480.1,AT1G50420.1,AT1G52150.2,AT1G63100.1,AT1G66350.1,AT1G68360.1,AT1G68760.1,AT1G73500.1,AT2G18500.1,AT2G22540.1,AT2G27230.2,AT2G28510.1,AT2G29630.2,AT2G31160.1,AT2G32100.1,AT2G33310.2,AT2G33620.2,AT2G34140.1,AT2G34710.1,AT2G35940.3,AT2G38470.1,AT2G41710.3,AT2G42610.1,AT2…	ADA2A,ANT,AO,APT5,AT1G19210,AT1G63100,AT1G68360,AT2G28510,AT2G33620,AT2G34140,AT2G41710,AT5G51190,AT5G66770,ATHB-15,ATHB-7,At5g17990,BLH1,CRD1,CYP83B1,DHS1,DHS2,EBP,ERF-1,ERF4,ERF71,FBA2,FOLB2,HSF3,HSFA3,HSFA4A,IAA13,IAA27,IDD2,LHW,LSH10,LSH3,LSH6,MBD10,MKK9,MP,MYB15,MYB84,NAC014,NLA,NUDX1,OFP16,OFP7,PBRP,PC-MYB1,PDX2,PHB,PHYA,PRR5,PRR7,PTAC5,PTL,RDR1,REV,RGL1,RNR2A,SCL3,STZ,SVP,SWI3A,THIC,UGE1,W…
	GO:0001101	response to acid chemical	39	1058	1.38e-05	AT1G01470.1,AT1G02730.1,AT1G02860.1,AT1G09340.1,AT1G14790.1,AT1G22690.1,AT1G27730.1,AT1G50420.1,AT1G61340.2,AT1G66350.1,AT1G68010.2,AT1G68360.1,AT1G70520.1,AT1G72520.1,AT1G74520.1,AT1G79460.1,AT2G17840.1,AT2G35940.3,AT2G38470.1,AT2G39730.1,AT2G46680.1,AT2G46820.1,AT3G05640.1,AT3G12490.2,AT3G15210.1,AT3G16770.1,AT3G23250.1,AT3G45140.1,AT3G49690.1,AT3G50930.1,AT3G56400.1,AT4G19810.1,AT4G36830.1,AT4…	AT1G22690,AT1G68360,AT3G05640,AT5G14920,ATHB-7,BCS1,BLH1,BT4,CRB,CRK2,CSLD5,CYSB,ChiC,EBP,ERD7,ERF4,FBA2,FBS1,GA2,HOS3-1,HPR,HVA22A,LEA14,LOX2,LOX4,MYB15,MYB84,NLA,PSI-P,PTR3,RCA,RDR1,RGL1,SAL1,SCL3,SNAP33,STZ,WRKY33,WRKY70
	GO:0010200	response to chitin	12	113	1.42e-05	AT1G27730.1,AT2G38470.1,AT3G15210.1,AT3G16720.1,AT3G23250.1,AT3G56400.1,AT4G17500.1,AT4G18880.1,AT5G03680.1,AT5G03720.1,AT5G49520.1,AT5G51190.1	AT5G51190,ATL2,ERF-1,ERF4,HSFA3,HSFA4A,MYB15,PTL,STZ,WRKY33,WRKY48,WRKY70
	GO:0031323	regulation of cellular metabolic process	73	2696	1.58e-05	AT1G02860.1,AT1G07090.1,AT1G09340.1,AT1G09570.1,AT1G11580.1,AT1G15340.1,AT1G19210.1,AT1G19850.1,AT1G23380.2,AT1G27730.1,AT1G33060.2,AT1G46480.1,AT1G50420.1,AT1G52150.2,AT1G63100.1,AT1G66350.1,AT1G68360.1,AT1G73500.1,AT2G18500.1,AT2G22540.1,AT2G27230.2,AT2G28510.1,AT2G30570.1,AT2G31160.1,AT2G32100.1,AT2G33310.2,AT2G33620.2,AT2G34140.1,AT2G34710.1,AT2G35940.3,AT2G38470.1,AT2G41680.1,AT2G41710.3,AT2…	ADA2A,ANT,AT1G19210,AT1G63100,AT1G68360,AT2G28510,AT2G33620,AT2G34140,AT2G41710,AT5G14920,AT5G40460,AT5G47550,AT5G51190,AT5G66770,ATHB-15,ATHB-7,BCB,BLH1,BT4,CRB,CRD1,CSP41A,CYSB,EBP,ERF-1,ERF4,ERF71,HSF3,HSFA3,HSFA4A,IAA13,IAA27,IDD2,J20,KNAT1,KNAT6,LHW,LSH10,LSH3,LSH6,MBD10,MKK9,MP,MYB15,MYB84,NAC014,NLA,NTRC,OFP16,OFP7,PBRP,PC-MYB1,PHB,PHYA,PMEPCRA,PRR5,PRR7,PSBO2,PSBW,PTAC5,PTL,REV,RGL1,SCL3,…
	GO:0010243	response to organonitrogen compound	15	194	2.01e-05	AT1G27730.1,AT1G61340.2,AT2G29630.2,AT2G38470.1,AT3G15210.1,AT3G16720.1,AT3G23250.1,AT3G56400.1,AT4G17500.1,AT4G18880.1,AT5G03680.1,AT5G03720.1,AT5G46050.1,AT5G49520.1,AT5G51190.1	AT5G51190,ATL2,ERF-1,ERF4,FBS1,HSFA3,HSFA4A,MYB15,PTL,PTR3,STZ,THIC,WRKY33,WRKY48,WRKY70
	GO:0044238	primary metabolic process	166	8114	2.53e-05	AT1G01970.1,AT1G02400.1,AT1G02730.1,AT1G02860.1,AT1G07090.1,AT1G09340.1,AT1G09570.1,AT1G11580.1,AT1G12780.1,AT1G12900.1,AT1G13700.1,AT1G14790.1,AT1G15000.1,AT1G15340.1,AT1G19210.1,AT1G19850.1,AT1G21410.1,AT1G24330.1,AT1G27680.1,AT1G27730.1,AT1G29340.1,AT1G30040.1,AT1G30610.1,AT1G31800.1,AT1G33060.2,AT1G46480.1,AT1G49850.1,AT1G50420.1,AT1G52150.2,AT1G54780.1,AT1G55610.2,AT1G63100.1,AT1G66350.1,AT1…	AAE13,ADA2A,ANT,AO,APG3,APL2,APT5,ARASP,AT1G01970,AT1G19210,AT1G24330,AT1G49850,AT1G63100,AT1G67340,AT1G68360,AT1G72180,AT1G80870,AT2G01820,AT2G24130,AT2G28510,AT2G33620,AT2G34140,AT2G36570,AT2G41710,AT2G41890,AT3G05640,AT3G07700,AT3G20015,AT3G51950,AT3G53190,AT3G53380,AT3G59350,AT3G62260,AT4G03230,AT4G08850,AT4G20430,AT5G10690,AT5G14450,AT5G24010,AT5G40250,AT5G48800,AT5G51190,AT5G56590,AT5G58330…
	GO:0019222	regulation of metabolic process	76	2911	3.15e-05	AT1G02860.1,AT1G05460.1,AT1G07090.1,AT1G09340.1,AT1G09570.1,AT1G11580.1,AT1G14790.1,AT1G15340.1,AT1G19210.1,AT1G19850.1,AT1G23380.2,AT1G27730.1,AT1G33060.2,AT1G46480.1,AT1G50420.1,AT1G52150.2,AT1G63100.1,AT1G66350.1,AT1G68360.1,AT1G73500.1,AT2G18500.1,AT2G22540.1,AT2G27230.2,AT2G28510.1,AT2G30570.1,AT2G31160.1,AT2G32100.1,AT2G33310.2,AT2G33620.2,AT2G34140.1,AT2G34710.1,AT2G35940.3,AT2G38470.1,AT2…	ADA2A,ANT,AT1G19210,AT1G63100,AT1G68360,AT2G28510,AT2G33620,AT2G34140,AT2G41710,AT5G14920,AT5G40460,AT5G47550,AT5G51190,AT5G66770,ATHB-15,ATHB-7,BCB,BLH1,BT4,CRB,CRD1,CSP41A,CYSB,EBP,ERF-1,ERF4,ERF71,HSF3,HSFA3,HSFA4A,IAA13,IAA27,IDD2,J20,KNAT1,KNAT6,LHW,LSH10,LSH3,LSH6,MBD10,MKK9,MP,MYB15,MYB84,NAC014,NLA,NTRC,OFP16,OFP7,PBRP,PC-MYB1,PHB,PHYA,PMEPCRA,PRR5,PRR7,PSBO2,PSBW,PTAC5,PTL,RDR1,REV,RGL1,…
	GO:0009611	response to wounding	14	177	3.46e-05	AT1G01470.1,AT1G09340.1,AT1G27730.1,AT1G61340.2,AT1G72520.1,AT1G73500.1,AT2G27690.1,AT3G45140.1,AT3G48520.1,AT4G39980.1,AT5G46050.1,AT5G47910.1,AT5G63450.1,AT5G67480.2	BT4,CRB,CYP94B1,CYP94B3,CYP94C1,DHS1,FBS1,LEA14,LOX2,LOX4,MKK9,PTR3,RBOHD,STZ
	GO:0031326	regulation of cellular biosynthetic process	65	2361	3.92e-05	AT1G07090.1,AT1G09340.1,AT1G09570.1,AT1G11580.1,AT1G15340.1,AT1G19210.1,AT1G19850.1,AT1G23380.2,AT1G27730.1,AT1G33060.2,AT1G46480.1,AT1G50420.1,AT1G52150.2,AT1G63100.1,AT1G66350.1,AT1G68360.1,AT1G73500.1,AT2G18500.1,AT2G22540.1,AT2G27230.2,AT2G28510.1,AT2G31160.1,AT2G32100.1,AT2G33310.2,AT2G33620.2,AT2G34140.1,AT2G34710.1,AT2G35940.3,AT2G38470.1,AT2G41680.1,AT2G41710.3,AT2G42610.1,AT2G46680.1,AT2…	ADA2A,ANT,AT1G19210,AT1G63100,AT1G68360,AT2G28510,AT2G33620,AT2G34140,AT2G41710,AT5G51190,AT5G66770,ATHB-15,ATHB-7,BCB,BLH1,BT4,CRB,CSP41A,EBP,ERF-1,ERF4,ERF71,HSF3,HSFA3,HSFA4A,IAA13,IAA27,IDD2,J20,KNAT1,KNAT6,LHW,LSH10,LSH3,LSH6,MBD10,MKK9,MP,MYB15,MYB84,NAC014,NTRC,OFP16,OFP7,PBRP,PC-MYB1,PHB,PHYA,PMEPCRA,PRR5,PRR7,PTAC5,PTL,REV,RGL1,SCL3,STZ,SVP,SWI3A,WOX13,WOX4,WRKY23,WRKY33,WRKY48,WRKY70
	GO:0006355	regulation of transcription, DNA-templated	61	2167	4.31e-05	AT1G07090.1,AT1G09340.1,AT1G09570.1,AT1G15340.1,AT1G19210.1,AT1G19850.1,AT1G23380.2,AT1G27730.1,AT1G33060.2,AT1G46480.1,AT1G50420.1,AT1G52150.2,AT1G63100.1,AT1G66350.1,AT1G68360.1,AT1G73500.1,AT2G18500.1,AT2G22540.1,AT2G27230.2,AT2G28510.1,AT2G31160.1,AT2G32100.1,AT2G33310.2,AT2G33620.2,AT2G34140.1,AT2G34710.1,AT2G35940.3,AT2G38470.1,AT2G41710.3,AT2G42610.1,AT2G46680.1,AT2G47260.1,AT2G47520.1,AT2…	ADA2A,ANT,AT1G19210,AT1G63100,AT1G68360,AT2G28510,AT2G33620,AT2G34140,AT2G41710,AT5G51190,AT5G66770,ATHB-15,ATHB-7,BLH1,BT4,CRB,CSP41A,EBP,ERF-1,ERF4,ERF71,HSF3,HSFA3,HSFA4A,IAA13,IAA27,IDD2,KNAT1,KNAT6,LHW,LSH10,LSH3,LSH6,MBD10,MKK9,MP,MYB15,MYB84,NAC014,OFP16,OFP7,PBRP,PC-MYB1,PHB,PHYA,PRR5,PRR7,PTAC5,PTL,REV,RGL1,SCL3,STZ,SVP,SWI3A,WOX13,WOX4,WRKY23,WRKY33,WRKY48,WRKY70
	GO:2000112	regulation of cellular macromolecule biosynthetic process	63	2295	5.75e-05	AT1G07090.1,AT1G09340.1,AT1G09570.1,AT1G11580.1,AT1G15340.1,AT1G19210.1,AT1G19850.1,AT1G23380.2,AT1G27730.1,AT1G33060.2,AT1G46480.1,AT1G50420.1,AT1G52150.2,AT1G63100.1,AT1G66350.1,AT1G68360.1,AT1G73500.1,AT2G18500.1,AT2G22540.1,AT2G27230.2,AT2G28510.1,AT2G31160.1,AT2G32100.1,AT2G33310.2,AT2G33620.2,AT2G34140.1,AT2G34710.1,AT2G35940.3,AT2G38470.1,AT2G41680.1,AT2G41710.3,AT2G42610.1,AT2G46680.1,AT2…	ADA2A,ANT,AT1G19210,AT1G63100,AT1G68360,AT2G28510,AT2G33620,AT2G34140,AT2G41710,AT5G51190,AT5G66770,ATHB-15,ATHB-7,BLH1,BT4,CRB,CSP41A,EBP,ERF-1,ERF4,ERF71,HSF3,HSFA3,HSFA4A,IAA13,IAA27,IDD2,KNAT1,KNAT6,LHW,LSH10,LSH3,LSH6,MBD10,MKK9,MP,MYB15,MYB84,NAC014,NTRC,OFP16,OFP7,PBRP,PC-MYB1,PHB,PHYA,PMEPCRA,PRR5,PRR7,PTAC5,PTL,REV,RGL1,SCL3,STZ,SVP,SWI3A,WOX13,WOX4,WRKY23,WRKY33,WRKY48,WRKY70
	GO:0044271	cellular nitrogen compound biosynthetic process	74	2881	6.57e-05	AT1G07090.1,AT1G09340.1,AT1G09570.1,AT1G12780.1,AT1G14790.1,AT1G15340.1,AT1G19210.1,AT1G19850.1,AT1G27730.1,AT1G33060.2,AT1G46480.1,AT1G50420.1,AT1G52150.2,AT1G63100.1,AT1G66350.1,AT1G68360.1,AT1G68760.1,AT1G73500.1,AT1G75350.1,AT2G18500.1,AT2G22540.1,AT2G27230.2,AT2G28510.1,AT2G29630.2,AT2G31160.1,AT2G32100.1,AT2G33310.2,AT2G33620.2,AT2G34140.1,AT2G34710.1,AT2G35940.3,AT2G38470.1,AT2G39140.1,AT2…	ADA2A,ANT,AO,APG3,APT5,AT1G19210,AT1G63100,AT1G68360,AT2G28510,AT2G33620,AT2G34140,AT2G41710,AT5G51190,AT5G66770,ATHB-15,ATHB-7,At5g17990,BLH1,CRB,CRD1,CSP41A,CYP83B1,EBP,ERF-1,ERF4,ERF71,FBA2,FOLB2,HSF3,HSFA3,HSFA4A,IAA13,IAA27,IDD2,LHW,LSH10,LSH3,LSH6,MBD10,MKK9,MP,MYB15,MYB84,NAC014,NUDX1,OFP16,OFP7,PBRP,PC-MYB1,PDX2,PHB,PHYA,PRR5,PRR7,PTAC5,PTL,RDR1,REV,RGL1,RNR2A,SCL3,STZ,SVP,SVR1,SWI3A,THIC…
	GO:0051252	regulation of RNA metabolic process	61	2209	6.71e-05	AT1G07090.1,AT1G09340.1,AT1G09570.1,AT1G15340.1,AT1G19210.1,AT1G19850.1,AT1G23380.2,AT1G27730.1,AT1G33060.2,AT1G46480.1,AT1G50420.1,AT1G52150.2,AT1G63100.1,AT1G66350.1,AT1G68360.1,AT1G73500.1,AT2G18500.1,AT2G22540.1,AT2G27230.2,AT2G28510.1,AT2G31160.1,AT2G32100.1,AT2G33310.2,AT2G33620.2,AT2G34140.1,AT2G34710.1,AT2G35940.3,AT2G38470.1,AT2G41710.3,AT2G42610.1,AT2G46680.1,AT2G47260.1,AT2G47520.1,AT2…	ADA2A,ANT,AT1G19210,AT1G63100,AT1G68360,AT2G28510,AT2G33620,AT2G34140,AT2G41710,AT5G51190,AT5G66770,ATHB-15,ATHB-7,BLH1,BT4,CRB,CSP41A,EBP,ERF-1,ERF4,ERF71,HSF3,HSFA3,HSFA4A,IAA13,IAA27,IDD2,KNAT1,KNAT6,LHW,LSH10,LSH3,LSH6,MBD10,MKK9,MP,MYB15,MYB84,NAC014,OFP16,OFP7,PBRP,PC-MYB1,PHB,PHYA,PRR5,PRR7,PTAC5,PTL,REV,RGL1,SCL3,STZ,SVP,SWI3A,WOX13,WOX4,WRKY23,WRKY33,WRKY48,WRKY70
	GO:0097659	nucleic acid-templated transcription	56	1963	7.08e-05	AT1G07090.1,AT1G09570.1,AT1G14790.1,AT1G15340.1,AT1G19210.1,AT1G19850.1,AT1G27730.1,AT1G33060.2,AT1G46480.1,AT1G50420.1,AT1G52150.2,AT1G63100.1,AT1G66350.1,AT1G68360.1,AT2G18500.1,AT2G22540.1,AT2G27230.2,AT2G28510.1,AT2G31160.1,AT2G32100.1,AT2G33310.2,AT2G33620.2,AT2G34140.1,AT2G34710.1,AT2G35940.3,AT2G38470.1,AT2G41710.3,AT2G42610.1,AT2G46680.1,AT2G47260.1,AT2G47520.1,AT2G47620.1,AT3G07740.4,AT3…	ADA2A,ANT,AT1G19210,AT1G63100,AT1G68360,AT2G28510,AT2G33620,AT2G34140,AT2G41710,AT5G51190,AT5G66770,ATHB-15,ATHB-7,BLH1,EBP,ERF-1,ERF4,ERF71,HSF3,HSFA3,HSFA4A,IAA13,IAA27,IDD2,LHW,LSH10,LSH3,LSH6,MBD10,MP,MYB15,MYB84,NAC014,OFP16,OFP7,PBRP,PC-MYB1,PHB,PHYA,PRR5,PRR7,PTAC5,PTL,RDR1,REV,RGL1,SCL3,STZ,SVP,SWI3A,WOX13,WOX4,WRKY23,WRKY33,WRKY48,WRKY70
	GO:0080090	regulation of primary metabolic process	69	2632	7.41e-05	AT1G07090.1,AT1G09340.1,AT1G09570.1,AT1G11580.1,AT1G15340.1,AT1G19210.1,AT1G19850.1,AT1G23380.2,AT1G27730.1,AT1G33060.2,AT1G46480.1,AT1G50420.1,AT1G52150.2,AT1G63100.1,AT1G66350.1,AT1G68360.1,AT1G73500.1,AT2G18500.1,AT2G22540.1,AT2G27230.2,AT2G28510.1,AT2G31160.1,AT2G32100.1,AT2G33310.2,AT2G33620.2,AT2G34140.1,AT2G34710.1,AT2G35940.3,AT2G38470.1,AT2G41680.1,AT2G41710.3,AT2G42610.1,AT2G46680.1,AT2…	ADA2A,ANT,AT1G19210,AT1G63100,AT1G68360,AT2G28510,AT2G33620,AT2G34140,AT2G41710,AT5G40460,AT5G47550,AT5G51190,AT5G66770,ATHB-15,ATHB-7,BLH1,BT4,CRB,CSP41A,CYSB,EBP,ERF-1,ERF4,ERF71,HSF3,HSFA3,HSFA4A,IAA13,IAA27,IDD2,J20,KNAT1,KNAT6,LHW,LSH10,LSH3,LSH6,MBD10,MKK9,MP,MYB15,MYB84,NAC014,NTRC,OFP16,OFP7,PBRP,PC-MYB1,PHB,PHYA,PMEPCRA,PRR5,PRR7,PSBO2,PTAC5,PTL,REV,RGL1,SCL3,STZ,SVP,SWI3A,TRX-M4,WOX13,W…
	GO:0034654	nucleobase-containing compound biosynthetic process	62	2274	7.52e-05	AT1G07090.1,AT1G09570.1,AT1G12780.1,AT1G14790.1,AT1G15340.1,AT1G19210.1,AT1G19850.1,AT1G27730.1,AT1G33060.2,AT1G46480.1,AT1G50420.1,AT1G52150.2,AT1G63100.1,AT1G66350.1,AT1G68360.1,AT1G68760.1,AT2G18500.1,AT2G22540.1,AT2G27230.2,AT2G28510.1,AT2G31160.1,AT2G32100.1,AT2G33310.2,AT2G33620.2,AT2G34140.1,AT2G34710.1,AT2G35940.3,AT2G38470.1,AT2G41710.3,AT2G42610.1,AT2G46680.1,AT2G47260.1,AT2G47520.1,AT2…	ADA2A,ANT,AO,APT5,AT1G19210,AT1G63100,AT1G68360,AT2G28510,AT2G33620,AT2G34140,AT2G41710,AT5G51190,AT5G66770,ATHB-15,ATHB-7,BLH1,EBP,ERF-1,ERF4,ERF71,FBA2,HSF3,HSFA3,HSFA4A,IAA13,IAA27,IDD2,LHW,LSH10,LSH3,LSH6,MBD10,MP,MYB15,MYB84,NAC014,NUDX1,OFP16,OFP7,PBRP,PC-MYB1,PHB,PHYA,PRR5,PRR7,PTAC5,PTL,RDR1,REV,RGL1,RNR2A,SCL3,STZ,SVP,SWI3A,UGE1,WOX13,WOX4,WRKY23,WRKY33,WRKY48,WRKY70
	GO:0051171	regulation of nitrogen compound metabolic process	68	2591	8.07e-05	AT1G07090.1,AT1G09340.1,AT1G09570.1,AT1G11580.1,AT1G15340.1,AT1G19210.1,AT1G19850.1,AT1G23380.2,AT1G27730.1,AT1G33060.2,AT1G46480.1,AT1G50420.1,AT1G52150.2,AT1G63100.1,AT1G66350.1,AT1G68360.1,AT1G73500.1,AT2G18500.1,AT2G22540.1,AT2G27230.2,AT2G28510.1,AT2G31160.1,AT2G32100.1,AT2G33310.2,AT2G33620.2,AT2G34140.1,AT2G34710.1,AT2G35940.3,AT2G38470.1,AT2G41680.1,AT2G41710.3,AT2G42610.1,AT2G46680.1,AT2…	ADA2A,ANT,AT1G19210,AT1G63100,AT1G68360,AT2G28510,AT2G33620,AT2G34140,AT2G41710,AT5G40460,AT5G47550,AT5G51190,AT5G66770,ATHB-15,ATHB-7,BLH1,BT4,CRB,CRD1,CSP41A,CYSB,EBP,ERF-1,ERF4,ERF71,HSF3,HSFA3,HSFA4A,IAA13,IAA27,IDD2,KNAT1,KNAT6,LHW,LSH10,LSH3,LSH6,MBD10,MKK9,MP,MYB15,MYB84,NAC014,NTRC,OFP16,OFP7,PBRP,PC-MYB1,PHB,PHYA,PMEPCRA,PRR5,PRR7,PSBO2,PTAC5,PTL,REV,RGL1,SCL3,STZ,SVP,SWI3A,WOX13,WOX4,WR…
	GO:1901698	response to nitrogen compound	17	294	0.0001	AT1G02860.1,AT1G14790.1,AT1G27730.1,AT1G61340.2,AT2G29630.2,AT2G38470.1,AT3G15210.1,AT3G16720.1,AT3G23250.1,AT3G56400.1,AT4G17500.1,AT4G18880.1,AT5G03680.1,AT5G03720.1,AT5G46050.1,AT5G49520.1,AT5G51190.1	AT5G51190,ATL2,ERF-1,ERF4,FBS1,HSFA3,HSFA4A,MYB15,NLA,PTL,PTR3,RDR1,STZ,THIC,WRKY33,WRKY48,WRKY70
	GO:0006351	transcription, DNA-templated	55	1957	0.00012	AT1G07090.1,AT1G09570.1,AT1G15340.1,AT1G19210.1,AT1G19850.1,AT1G27730.1,AT1G33060.2,AT1G46480.1,AT1G50420.1,AT1G52150.2,AT1G63100.1,AT1G66350.1,AT1G68360.1,AT2G18500.1,AT2G22540.1,AT2G27230.2,AT2G28510.1,AT2G31160.1,AT2G32100.1,AT2G33310.2,AT2G33620.2,AT2G34140.1,AT2G34710.1,AT2G35940.3,AT2G38470.1,AT2G41710.3,AT2G42610.1,AT2G46680.1,AT2G47260.1,AT2G47520.1,AT2G47620.1,AT3G07740.4,AT3G15210.1,AT3…	ADA2A,ANT,AT1G19210,AT1G63100,AT1G68360,AT2G28510,AT2G33620,AT2G34140,AT2G41710,AT5G51190,AT5G66770,ATHB-15,ATHB-7,BLH1,EBP,ERF-1,ERF4,ERF71,HSF3,HSFA3,HSFA4A,IAA13,IAA27,IDD2,LHW,LSH10,LSH3,LSH6,MBD10,MP,MYB15,MYB84,NAC014,OFP16,OFP7,PBRP,PC-MYB1,PHB,PHYA,PRR5,PRR7,PTAC5,PTL,REV,RGL1,SCL3,STZ,SVP,SWI3A,WOX13,WOX4,WRKY23,WRKY33,WRKY48,WRKY70
	GO:0051704	multi-organism process	45	1475	0.00013	AT1G01470.1,AT1G02860.1,AT1G05460.1,AT1G09340.1,AT1G11580.1,AT1G14790.1,AT1G20020.1,AT1G29340.1,AT1G60420.1,AT1G61340.2,AT1G72520.1,AT1G73500.1,AT2G05940.1,AT2G29650.1,AT2G35940.3,AT2G37660.1,AT2G38470.1,AT2G39730.1,AT2G41890.1,AT2G47260.1,AT3G15210.1,AT3G16770.1,AT3G45140.1,AT3G48520.1,AT3G50930.1,AT3G54950.1,AT3G55800.1,AT3G56400.1,AT3G60190.1,AT4G03230.1,AT4G03280.1,AT4G28250.1,AT4G31500.1,AT4…	ADR1-L1,AT1G60420,AT2G37660,AT2G41890,AT4G03230,At5g46330,BCB,BCS1,BLH1,CRB,CYP83B1,CYP94B3,DL1E,EBP,ERF4,EXPB3,FBS1,FNR2,LEA14,LOX2,LOX4,MKK9,NIK1,NLA,PA2,PCK1,PETC,PHT4;1,PLP7,PME44,PMEPCRA,PTR3,PUB17,RBOHD,RCA,RDR1,RIPK,SBPASE,SDE3,SNAP33,TRN2,WRKY23,WRKY33,WRKY48,WRKY70
	GO:0010468	regulation of gene expression	64	2460	0.0002	AT1G05460.1,AT1G07090.1,AT1G09340.1,AT1G09570.1,AT1G11580.1,AT1G14790.1,AT1G15340.1,AT1G19210.1,AT1G19850.1,AT1G23380.2,AT1G27730.1,AT1G33060.2,AT1G46480.1,AT1G50420.1,AT1G52150.2,AT1G63100.1,AT1G66350.1,AT1G68360.1,AT1G73500.1,AT2G18500.1,AT2G22540.1,AT2G27230.2,AT2G28510.1,AT2G31160.1,AT2G32100.1,AT2G33310.2,AT2G33620.2,AT2G34140.1,AT2G34710.1,AT2G35940.3,AT2G38470.1,AT2G41710.3,AT2G42610.1,AT2…	ADA2A,ANT,AT1G19210,AT1G63100,AT1G68360,AT2G28510,AT2G33620,AT2G34140,AT2G41710,AT5G51190,AT5G66770,ATHB-15,ATHB-7,BLH1,BT4,CRB,CSP41A,EBP,ERF-1,ERF4,ERF71,HSF3,HSFA3,HSFA4A,IAA13,IAA27,IDD2,KNAT1,KNAT6,LHW,LSH10,LSH3,LSH6,MBD10,MKK9,MP,MYB15,MYB84,NAC014,OFP16,OFP7,PBRP,PC-MYB1,PHB,PHYA,PMEPCRA,PRR5,PRR7,PTAC5,PTL,RDR1,REV,RGL1,SCL3,SDE3,STZ,SVP,SWI3A,WOX13,WOX4,WRKY23,WRKY33,WRKY48,WRKY70
	GO:0042742	defense response to bacterium	17	315	0.00022	AT1G02860.1,AT1G09340.1,AT1G20020.1,AT2G05940.1,AT2G37660.1,AT2G38470.1,AT2G39730.1,AT3G15210.1,AT3G55800.1,AT3G56400.1,AT4G03280.1,AT4G31500.1,AT4G33220.1,AT4G33300.2,AT5G46050.1,AT5G46330.1,AT5G49520.1	ADR1-L1,AT2G37660,At5g46330,CRB,CYP83B1,ERF4,FNR2,NLA,PETC,PME44,PTR3,RCA,RIPK,SBPASE,WRKY33,WRKY48,WRKY70
	GO:0060255	regulation of macromolecule metabolic process	69	2736	0.00022	AT1G05460.1,AT1G07090.1,AT1G09340.1,AT1G09570.1,AT1G11580.1,AT1G14790.1,AT1G15340.1,AT1G19210.1,AT1G19850.1,AT1G23380.2,AT1G27730.1,AT1G33060.2,AT1G46480.1,AT1G50420.1,AT1G52150.2,AT1G63100.1,AT1G66350.1,AT1G68360.1,AT1G73500.1,AT2G18500.1,AT2G22540.1,AT2G27230.2,AT2G28510.1,AT2G31160.1,AT2G32100.1,AT2G33310.2,AT2G33620.2,AT2G34140.1,AT2G34710.1,AT2G35940.3,AT2G38470.1,AT2G41680.1,AT2G41710.3,AT2…	ADA2A,ANT,AT1G19210,AT1G63100,AT1G68360,AT2G28510,AT2G33620,AT2G34140,AT2G41710,AT5G40460,AT5G47550,AT5G51190,AT5G66770,ATHB-15,ATHB-7,BLH1,BT4,CRB,CSP41A,CYSB,EBP,ERF-1,ERF4,ERF71,HSF3,HSFA3,HSFA4A,IAA13,IAA27,IDD2,KNAT1,KNAT6,LHW,LSH10,LSH3,LSH6,MBD10,MKK9,MP,MYB15,MYB84,NAC014,NTRC,OFP16,OFP7,PBRP,PC-MYB1,PHB,PHYA,PMEPCRA,PRR5,PRR7,PSBO2,PTAC5,PTL,RDR1,REV,RGL1,SCL3,SDE3,STZ,SVP,SWI3A,WOX13,WO…
	GO:0044260	cellular macromolecule metabolic process	113	5262	0.00033	AT1G02730.1,AT1G02860.1,AT1G07090.1,AT1G09340.1,AT1G09570.1,AT1G12780.1,AT1G15000.1,AT1G15340.1,AT1G19210.1,AT1G19850.1,AT1G21410.1,AT1G24330.1,AT1G27680.1,AT1G27730.1,AT1G29340.1,AT1G33060.2,AT1G46480.1,AT1G49850.1,AT1G50420.1,AT1G52150.2,AT1G54780.1,AT1G55610.2,AT1G63100.1,AT1G66350.1,AT1G67340.1,AT1G68360.1,AT1G70520.1,AT1G72180.1,AT1G73500.1,AT1G75350.1,AT1G75690.1,AT1G80870.1,AT2G01820.1,AT2…	ADA2A,ANT,APG3,APL2,AT1G19210,AT1G24330,AT1G49850,AT1G63100,AT1G67340,AT1G68360,AT1G72180,AT1G80870,AT2G01820,AT2G24130,AT2G28510,AT2G33620,AT2G34140,AT2G36570,AT2G41710,AT2G41890,AT3G05640,AT3G53380,AT3G59350,AT3G62260,AT4G03230,AT4G08850,AT5G24010,AT5G40250,AT5G48800,AT5G51190,AT5G66770,ATHB-15,ATHB-7,ATL2,At5g46330,BLH1,BRL1,BT4,CCR4,CRB,CRK2,CSLD5,CSP41A,CT-BMY,EBP,ERF-1,ERF4,ERF71,GH9B13,GSL…
	GO:0055114	oxidation-reduction process	41	1348	0.00035	AT1G02400.1,AT1G08380.1,AT1G11840.6,AT1G12900.1,AT1G17650.1,AT1G20020.1,AT1G27680.1,AT1G30040.1,AT1G31800.1,AT1G55510.1,AT1G60420.1,AT1G68010.2,AT1G72520.1,AT1G75280.1,AT2G21280.1,AT2G27690.1,AT2G39930.1,AT2G40370.1,AT2G41540.2,AT2G41680.1,AT2G46820.1,AT3G15360.1,AT3G23580.1,AT3G26060.2,AT3G45140.1,AT3G48520.1,AT3G50820.1,AT3G51030.1,AT3G56940.1,AT4G03280.1,AT4G09010.1,AT4G29720.1,AT4G31500.1,AT5…	AO,APL2,AT1G60420,AT1G75280,AT5G16990,AT5G58330,At1g55510,BCB,CRD1,CYP83B1,CYP94B1,CYP94B3,CYP94C1,CYP97A3,FNR2,GA2OX2,GA2OX6,GAPA-2,GDH1,GLX1,GLYR2,GPDHC1,HPR,ISA1,LAC5,LOX2,LOX4,NTRC,PA2,PAO5,PETC,PRXQ,PSAO,PSBO2,PSI-P,RBOHD,RNR2A,SULA,TL29,TRX-M4,TRX1
	GO:0009059	macromolecule biosynthetic process	70	2844	0.0004	AT1G02730.1,AT1G07090.1,AT1G09340.1,AT1G09570.1,AT1G12780.1,AT1G14790.1,AT1G15340.1,AT1G19210.1,AT1G19850.1,AT1G27680.1,AT1G27730.1,AT1G33060.2,AT1G46480.1,AT1G50420.1,AT1G52150.2,AT1G63100.1,AT1G66350.1,AT1G68360.1,AT1G75350.1,AT2G18500.1,AT2G22540.1,AT2G27230.2,AT2G28510.1,AT2G31160.1,AT2G32100.1,AT2G33310.2,AT2G33620.2,AT2G34140.1,AT2G34710.1,AT2G35940.3,AT2G38470.1,AT2G39140.1,AT2G39930.1,AT2…	ADA2A,ANT,APG3,APL2,AT1G19210,AT1G63100,AT1G68360,AT2G28510,AT2G33620,AT2G34140,AT2G41710,AT5G51190,AT5G66770,ATHB-15,ATHB-7,BLH1,CRB,CSLD5,CSP41A,EBP,ERF-1,ERF4,ERF71,GATL10,GAUT15,GSL12,HSF3,HSFA3,HSFA4A,IAA13,IAA27,IDD2,ISA1,LHW,LSH10,LSH3,LSH6,MBD10,MP,MYB15,MYB84,NAC014,OFP16,OFP7,PBRP,PC-MYB1,PHB,PHYA,PRR5,PRR7,PTAC5,PTL,RDR1,REV,RGL1,RNR2A,SBPASE,SCL3,STZ,SVP,SVR1,SWI3A,UGE1,WOX13,WOX4,WRK…
	GO:0051716	cellular response to stimulus	62	2428	0.00045	AT1G02860.1,AT1G09340.1,AT1G09570.1,AT1G14790.1,AT1G19210.1,AT1G19850.1,AT1G21410.1,AT1G22690.1,AT1G46480.1,AT1G60420.1,AT1G66350.1,AT1G68010.2,AT1G68360.1,AT1G68760.1,AT1G72180.1,AT1G73500.1,AT1G73590.1,AT1G79460.1,AT1G80870.1,AT2G01820.1,AT2G05940.1,AT2G17220.1,AT2G28930.1,AT2G33310.2,AT2G33770.1,AT2G38470.1,AT2G41680.1,AT2G41710.3,AT2G47520.1,AT3G07700.3,AT3G15210.1,AT3G15360.1,AT3G16770.1,AT3…	AT1G19210,AT1G22690,AT1G60420,AT1G68360,AT1G72180,AT1G80870,AT2G01820,AT2G41710,AT3G07700,AT3G59350,AT5G14920,AT5G47550,AT5G51190,At5g46330,BCB,BCS1,CRB,CYP83B1,CaS,EBP,ERF-1,ERF4,ERF71,GA2,HOS3-1,HPR,IAA13,IAA27,Kin3,LRP1,MKK9,MP,NIK1,NLA,NTRC,NUDX1,PA2,PCK1,PHO2,PHYA,PIN1,PK1B,PRR5,PRR7,PRXQ,RAC3,RBOHD,RDR1,RGL1,RIPK,RNR2A,SAL1,SHM1,SKP2A,SWEET17,TL29,TRN2,TRX-M4,TRX1,WOX4,WRKY33,WRKY70
	GO:0009657	plastid organization	13	210	0.0006	AT1G09340.1,AT1G32080.1,AT2G21280.1,AT2G31040.1,AT2G32480.1,AT2G39140.1,AT3G07700.3,AT3G56940.1,AT3G62910.1,AT3G63140.1,AT4G13670.1,AT4G31780.2,AT5G23120.1	APG3,ARASP,AT2G31040,AT3G07700,CRB,CRD1,CSP41A,HCF136,LrgB,MGD1,PTAC5,SULA,SVR1
	GO:0070887	cellular response to chemical stimulus	38	1245	0.00063	AT1G09340.1,AT1G14790.1,AT1G19210.1,AT1G19850.1,AT1G21410.1,AT1G22690.1,AT1G60420.1,AT1G66350.1,AT1G68010.2,AT1G68360.1,AT1G73500.1,AT1G73590.1,AT1G79460.1,AT2G33310.2,AT2G41680.1,AT2G41710.3,AT2G47520.1,AT3G07700.3,AT3G15210.1,AT3G15360.1,AT3G16770.1,AT3G26060.2,AT3G50930.1,AT3G51030.1,AT3G56400.1,AT4G09010.1,AT4G17500.1,AT4G29080.1,AT4G35020.2,AT4G36830.1,AT5G06720.1,AT5G12330.4,AT5G14920.1,AT5…	AT1G19210,AT1G22690,AT1G60420,AT1G68360,AT2G41710,AT3G07700,AT5G14920,AT5G51190,BCS1,CRB,CaS,EBP,ERF-1,ERF4,ERF71,GA2,HOS3-1,HPR,IAA13,IAA27,LRP1,MKK9,MP,NTRC,PA2,PIN1,PRXQ,RAC3,RBOHD,RDR1,RGL1,SAL1,SKP2A,TL29,TRN2,TRX-M4,TRX1,WRKY70
	GO:0010035	response to inorganic substance	28	795	0.00071	AT1G01470.1,AT1G02730.1,AT1G02860.1,AT1G09340.1,AT1G11840.6,AT1G27730.1,AT1G60420.1,AT1G68010.2,AT1G70520.1,AT1G72520.1,AT1G74520.1,AT1G75280.1,AT2G17840.1,AT2G38470.1,AT2G40370.1,AT2G41680.1,AT2G46680.1,AT3G05640.1,AT3G12490.2,AT3G23250.1,AT3G60190.1,AT4G37870.1,AT4G37930.1,AT4G38970.1,AT5G18170.1,AT5G23060.1,AT5G23120.1,AT5G67480.2	AT1G60420,AT1G75280,AT3G05640,ATHB-7,BT4,CRB,CRK2,CSLD5,CYSB,CaS,DL1E,ERD7,FBA2,GDH1,GLX1,HCF136,HPR,HVA22A,LAC5,LEA14,LOX4,MYB15,NLA,NTRC,PCK1,SHM1,STZ,WRKY33
	GO:0006979	response to oxidative stress	18	389	0.00073	AT1G27730.1,AT1G70520.1,AT1G72520.1,AT1G75280.1,AT2G41680.1,AT3G03190.1,AT3G07700.3,AT3G12490.2,AT3G15360.1,AT3G28340.1,AT3G51030.1,AT4G09010.1,AT4G18880.1,AT4G39640.1,AT5G06720.1,AT5G16990.1,AT5G20230.1,AT5G67480.2	AT1G75280,AT3G07700,AT5G16990,At4g39640,BCB,BT4,CRK2,CYSB,GATL10,GSTF11,HSFA4A,LOX4,NTRC,PA2,STZ,TL29,TRX-M4,TRX1
	GO:0009266	response to temperature stimulus	21	505	0.00073	AT1G09340.1,AT1G27730.1,AT1G74520.1,AT2G17840.1,AT2G22540.1,AT2G26250.1,AT2G38470.1,AT2G39730.1,AT3G12490.2,AT3G16770.1,AT3G23250.1,AT3G51780.1,AT4G13670.1,AT4G15920.1,AT4G17090.1,AT4G37930.1,AT5G03720.1,AT5G16820.2,AT5G20230.1,AT5G47550.1,AT5G47910.1	AT5G47550,BAG4,BCB,CRB,CT-BMY,CYSB,EBP,ERD7,HSF3,HSFA3,HVA22A,KCS10,MYB15,PTAC5,RBOHD,RCA,SHM1,STZ,SVP,SWEET17,WRKY33
	GO:0005976	polysaccharide metabolic process	18	401	0.001	AT1G02730.1,AT1G09340.1,AT1G11580.1,AT1G12780.1,AT1G27680.1,AT2G36870.1,AT2G39930.1,AT3G28340.1,AT3G53190.1,AT3G55800.1,AT3G58790.1,AT4G02290.1,AT4G03210.1,AT4G17090.1,AT4G19810.1,AT4G33220.1,AT5G13000.1,AT5G22510.1	APL2,AT3G53190,CRB,CSLD5,CT-BMY,ChiC,GATL10,GAUT15,GH9B13,GSL12,INV-E,ISA1,PME44,PMEPCRA,SBPASE,UGE1,XTH32,XTH9
	GO:0044283	small molecule biosynthetic process	24	647	0.0011	AT1G02400.1,AT1G02860.1,AT1G23360.1,AT1G30040.1,AT1G68760.1,AT1G72520.1,AT1G79460.1,AT2G26250.1,AT2G29630.2,AT3G16170.1,AT3G45140.1,AT3G55800.1,AT4G31500.1,AT4G33510.1,AT4G36830.1,AT4G37870.1,AT4G37930.1,AT4G38970.1,AT4G39980.1,AT5G11160.1,AT5G17990.1,AT5G56760.1,AT5G60540.1,AT5G62980.1	AAE13,APT5,At5g17990,CYP83B1,DHS1,DHS2,FBA2,FOLB2,GA2,GA2OX2,GA2OX6,HOS3-1,KCS10,LOX2,LOX4,MENG,NLA,NUDX1,PCK1,PDX2,SBPASE,SERAT1;1,SHM1,THIC
	GO:0034645	cellular macromolecule biosynthetic process	67	2793	0.0012	AT1G02730.1,AT1G07090.1,AT1G09340.1,AT1G09570.1,AT1G12780.1,AT1G15340.1,AT1G19210.1,AT1G19850.1,AT1G27680.1,AT1G27730.1,AT1G33060.2,AT1G46480.1,AT1G50420.1,AT1G52150.2,AT1G63100.1,AT1G66350.1,AT1G68360.1,AT1G75350.1,AT2G18500.1,AT2G22540.1,AT2G27230.2,AT2G28510.1,AT2G31160.1,AT2G32100.1,AT2G33310.2,AT2G33620.2,AT2G34140.1,AT2G34710.1,AT2G35940.3,AT2G38470.1,AT2G39140.1,AT2G39930.1,AT2G41710.3,AT2…	ADA2A,ANT,APG3,APL2,AT1G19210,AT1G63100,AT1G68360,AT2G28510,AT2G33620,AT2G34140,AT2G41710,AT5G51190,AT5G66770,ATHB-15,ATHB-7,BLH1,CRB,CSLD5,CSP41A,EBP,ERF-1,ERF4,ERF71,GSL12,HSF3,HSFA3,HSFA4A,IAA13,IAA27,IDD2,ISA1,LHW,LSH10,LSH3,LSH6,MBD10,MP,MYB15,MYB84,NAC014,OFP16,OFP7,PBRP,PC-MYB1,PHB,PHYA,PRR5,PRR7,PTAC5,PTL,REV,RGL1,RNR2A,SBPASE,SCL3,STZ,SVP,SVR1,SWI3A,UGE1,WOX13,WOX4,WRKY23,WRKY33,WRKY48,W…
	GO:0048507	meristem development	11	167	0.0013	AT1G19850.1,AT1G23380.2,AT1G46480.1,AT2G27230.2,AT2G31160.1,AT2G34710.1,AT4G37750.1,AT5G46700.1,AT5G60690.1,AT5G61480.1,AT5G65700.2	ANT,KNAT6,LHW,LSH3,MP,MPA24.5,PHB,PXY,REV,TRN2,WOX4
	GO:0032544	plastid translation	4	12	0.0014	AT1G09340.1,AT2G39140.1,AT3G62910.1,AT3G63140.1	APG3,CRB,CSP41A,SVR1
	GO:0043170	macromolecule metabolic process	130	6502	0.0014	AT1G01970.1,AT1G02730.1,AT1G02860.1,AT1G07090.1,AT1G09340.1,AT1G09570.1,AT1G11580.1,AT1G12780.1,AT1G14790.1,AT1G15000.1,AT1G15340.1,AT1G19210.1,AT1G19850.1,AT1G21410.1,AT1G24330.1,AT1G27680.1,AT1G27730.1,AT1G29340.1,AT1G30610.1,AT1G33060.2,AT1G46480.1,AT1G49850.1,AT1G50420.1,AT1G52150.2,AT1G54780.1,AT1G55610.2,AT1G63100.1,AT1G66350.1,AT1G67340.1,AT1G68360.1,AT1G70520.1,AT1G72180.1,AT1G73500.1,AT1…	ADA2A,ANT,APG3,APL2,ARASP,AT1G01970,AT1G19210,AT1G24330,AT1G49850,AT1G63100,AT1G67340,AT1G68360,AT1G72180,AT1G80870,AT2G01820,AT2G24130,AT2G28510,AT2G33620,AT2G34140,AT2G36570,AT2G41710,AT2G41890,AT3G05640,AT3G20015,AT3G51950,AT3G53190,AT3G53380,AT3G59350,AT3G62260,AT4G03230,AT4G08850,AT4G20430,AT5G10690,AT5G24010,AT5G40250,AT5G48800,AT5G51190,AT5G66770,ATHB-15,ATHB-7,ATL2,At4g39640,At5g46330,BLH…
	GO:0044281	small molecule metabolic process	42	1503	0.0015	AT1G02400.1,AT1G02860.1,AT1G09340.1,AT1G11840.6,AT1G12780.1,AT1G12900.1,AT1G13700.1,AT1G18590.1,AT1G23360.1,AT1G30040.1,AT1G68360.1,AT1G68760.1,AT1G69870.1,AT1G72520.1,AT1G79460.1,AT2G26250.1,AT2G29630.2,AT3G15360.1,AT3G16170.1,AT3G23580.1,AT3G45140.1,AT3G48520.1,AT3G51030.1,AT3G55800.1,AT3G62130.1,AT4G31500.1,AT4G33510.1,AT4G36830.1,AT4G37750.1,AT4G37870.1,AT4G37930.1,AT4G38970.1,AT4G39980.1,AT5…	AAE13,ANT,AO,APT5,AT1G68360,AT5G58330,At5g17990,CRB,CYP83B1,CYP94B1,CYP94B3,DHS1,DHS2,FBA2,FOLB2,GA2,GA2OX2,GA2OX6,GAPA-2,GDH1,GLX1,HOS3-1,KCS10,LCD,LOX2,LOX4,MENG,NLA,NRT1.7,NUDX1,PCK1,PDX2,PGL1,RNR2A,SBPASE,SERAT1;1,SHM1,SOT17,THIC,TRX-M4,TRX1,UGE1
	GO:0006952	defense response	37	1277	0.002	AT1G01470.1,AT1G02860.1,AT1G05460.1,AT1G09340.1,AT1G11580.1,AT1G14790.1,AT1G20020.1,AT1G29340.1,AT2G05940.1,AT2G17220.1,AT2G28930.1,AT2G37660.1,AT2G38470.1,AT2G39730.1,AT3G12490.2,AT3G15210.1,AT3G16720.1,AT3G48520.1,AT3G50930.1,AT3G55800.1,AT3G56400.1,AT3G60190.1,AT4G03280.1,AT4G17500.1,AT4G31500.1,AT4G33220.1,AT4G33300.2,AT4G37870.1,AT4G37930.1,AT5G06720.1,AT5G16000.1,AT5G46050.1,AT5G46330.1,AT5…	ADR1-L1,AT2G37660,AT5G47550,AT5G56590,ATL2,At5g46330,BCS1,CRB,CYP83B1,CYP94B3,CYSB,DL1E,ERF-1,ERF4,FNR2,Kin3,LEA14,NIK1,NLA,PA2,PCK1,PETC,PK1B,PME44,PMEPCRA,PTR3,PUB17,RBOHD,RCA,RDR1,RIPK,SBPASE,SDE3,SHM1,WRKY33,WRKY48,WRKY70
	GO:0006793	phosphorus metabolic process	44	1677	0.0038	AT1G09570.1,AT1G12780.1,AT1G13700.1,AT1G54780.1,AT1G55610.2,AT1G68760.1,AT1G70520.1,AT1G72180.1,AT1G73500.1,AT1G80870.1,AT2G01820.1,AT2G05940.1,AT2G17220.1,AT2G24130.1,AT2G28930.1,AT2G29630.2,AT2G36570.1,AT2G41540.2,AT2G41890.1,AT2G48010.1,AT3G05640.1,AT3G07700.3,AT3G20500.1,AT3G23580.1,AT3G53380.1,AT3G54950.1,AT3G55800.1,AT3G59350.1,AT3G62260.2,AT4G03230.1,AT4G08850.1,AT4G38970.1,AT5G11160.1,AT5…	AO,APT5,AT1G72180,AT1G80870,AT2G01820,AT2G24130,AT2G36570,AT2G41890,AT3G05640,AT3G07700,AT3G53380,AT3G59350,AT3G62260,AT4G03230,AT4G08850,AT5G24010,AT5G58330,At5g46330,BRL1,CCR4,CRK2,FBA2,GPDHC1,Kin3,MKK9,MPA24.5,NIK1,NUDX1,PAP18,PAP29,PDX2,PGL1,PHYA,PK1B,PLP7,PXY,RIPK,RKF3,RNR2A,SAL1,SBPASE,THIC,TLP18.3,UGE1
	GO:0006807	nitrogen compound metabolic process	138	7152	0.0038	AT1G01970.1,AT1G02860.1,AT1G07090.1,AT1G09340.1,AT1G09570.1,AT1G12780.1,AT1G13700.1,AT1G14790.1,AT1G15000.1,AT1G15340.1,AT1G18590.1,AT1G19210.1,AT1G19850.1,AT1G21410.1,AT1G24330.1,AT1G27730.1,AT1G29340.1,AT1G30610.1,AT1G33060.2,AT1G46480.1,AT1G49850.1,AT1G50420.1,AT1G52150.2,AT1G54780.1,AT1G55610.2,AT1G63100.1,AT1G66350.1,AT1G67340.1,AT1G68360.1,AT1G68760.1,AT1G69870.1,AT1G70520.1,AT1G72180.1,AT1…	ADA2A,ANT,AO,APG3,APT5,ARASP,AT1G01970,AT1G19210,AT1G24330,AT1G49850,AT1G63100,AT1G67340,AT1G68360,AT1G72180,AT1G80870,AT2G01820,AT2G24130,AT2G28510,AT2G33620,AT2G34140,AT2G36570,AT2G41710,AT2G41890,AT3G05640,AT3G20015,AT3G51950,AT3G53380,AT3G59350,AT3G62260,AT4G03230,AT4G08850,AT4G20430,AT5G10690,AT5G24010,AT5G40250,AT5G48800,AT5G51190,AT5G58330,AT5G66770,ATHB-15,ATHB-7,ATL2,At4g39640,At5g17990,…
	GO:0009658	chloroplast organization	10	160	0.0038	AT1G09340.1,AT1G32080.1,AT2G21280.1,AT2G31040.1,AT2G32480.1,AT3G07700.3,AT3G56940.1,AT3G62910.1,AT3G63140.1,AT4G13670.1	APG3,ARASP,AT2G31040,AT3G07700,CRB,CRD1,CSP41A,LrgB,PTAC5,SULA
	GO:0098542	defense response to other organism	27	847	0.004	AT1G01470.1,AT1G02860.1,AT1G05460.1,AT1G09340.1,AT1G11580.1,AT1G20020.1,AT1G29340.1,AT2G05940.1,AT2G37660.1,AT2G38470.1,AT2G39730.1,AT3G15210.1,AT3G48520.1,AT3G55800.1,AT3G56400.1,AT3G60190.1,AT4G03280.1,AT4G31500.1,AT4G33220.1,AT4G33300.2,AT4G37870.1,AT5G06720.1,AT5G16000.1,AT5G46050.1,AT5G46330.1,AT5G47910.1,AT5G49520.1	ADR1-L1,AT2G37660,At5g46330,CRB,CYP83B1,CYP94B3,DL1E,ERF4,FNR2,LEA14,NIK1,NLA,PA2,PCK1,PETC,PME44,PMEPCRA,PTR3,PUB17,RBOHD,RCA,RIPK,SBPASE,SDE3,WRKY33,WRKY48,WRKY70
	GO:0006796	phosphate-containing compound metabolic process	43	1636	0.0041	AT1G09570.1,AT1G13700.1,AT1G54780.1,AT1G55610.2,AT1G68760.1,AT1G70520.1,AT1G72180.1,AT1G73500.1,AT1G80870.1,AT2G01820.1,AT2G05940.1,AT2G17220.1,AT2G24130.1,AT2G28930.1,AT2G29630.2,AT2G36570.1,AT2G41540.2,AT2G41890.1,AT2G48010.1,AT3G05640.1,AT3G07700.3,AT3G20500.1,AT3G23580.1,AT3G53380.1,AT3G54950.1,AT3G55800.1,AT3G59350.1,AT3G62260.2,AT4G03230.1,AT4G08850.1,AT4G38970.1,AT5G11160.1,AT5G14760.1,AT5…	AO,APT5,AT1G72180,AT1G80870,AT2G01820,AT2G24130,AT2G36570,AT2G41890,AT3G05640,AT3G07700,AT3G53380,AT3G59350,AT3G62260,AT4G03230,AT4G08850,AT5G24010,AT5G58330,At5g46330,BRL1,CCR4,CRK2,FBA2,GPDHC1,Kin3,MKK9,MPA24.5,NIK1,NUDX1,PAP18,PAP29,PDX2,PGL1,PHYA,PK1B,PLP7,PXY,RIPK,RKF3,RNR2A,SAL1,SBPASE,THIC,TLP18.3
	GO:0005975	carbohydrate metabolic process	27	856	0.0045	AT1G02730.1,AT1G09340.1,AT1G11580.1,AT1G12780.1,AT1G12900.1,AT1G13700.1,AT1G27680.1,AT2G36870.1,AT2G39930.1,AT2G41540.2,AT3G18080.1,AT3G28340.1,AT3G53190.1,AT3G55800.1,AT3G58790.1,AT4G02290.1,AT4G03210.1,AT4G09510.1,AT4G17090.1,AT4G19810.1,AT4G33220.1,AT4G37870.1,AT4G38970.1,AT5G13000.1,AT5G22510.1,AT5G56590.1,AT5G58330.1	APL2,AT3G53190,AT5G56590,AT5G58330,BGLU44,CINV2,CRB,CSLD5,CT-BMY,ChiC,FBA2,GAPA-2,GATL10,GAUT15,GH9B13,GPDHC1,GSL12,INV-E,ISA1,PCK1,PGL1,PME44,PMEPCRA,SBPASE,UGE1,XTH32,XTH9
	GO:0007154	cell communication	45	1749	0.0045	AT1G09340.1,AT1G09570.1,AT1G19210.1,AT1G19850.1,AT1G21410.1,AT1G22690.1,AT1G46480.1,AT1G66350.1,AT1G68010.2,AT1G68360.1,AT1G72180.1,AT1G73500.1,AT1G73590.1,AT1G79460.1,AT1G80870.1,AT2G01820.1,AT2G05940.1,AT2G17220.1,AT2G28930.1,AT2G33310.2,AT2G33770.1,AT2G41710.3,AT2G41890.1,AT2G47520.1,AT3G15210.1,AT3G16770.1,AT3G50930.1,AT3G56400.1,AT3G59350.1,AT4G03230.1,AT4G15920.1,AT4G17500.1,AT4G29080.1,AT4…	AT1G19210,AT1G22690,AT1G68360,AT1G72180,AT1G80870,AT2G01820,AT2G41710,AT2G41890,AT3G59350,AT4G03230,AT5G14920,AT5G51190,At5g46330,BCS1,CRB,EBP,ERF-1,ERF4,ERF71,GA2,HPR,IAA13,IAA27,Kin3,LRP1,MKK9,MP,NIK1,PCK1,PHO2,PHYA,PIN1,PK1B,PRR5,PRR7,RAC3,RBOHD,RGL1,RIPK,SAL1,SKP2A,SWEET17,TRN2,WOX4,WRKY70
	GO:0042445	hormone metabolic process	11	205	0.0061	AT1G02400.1,AT1G02860.1,AT1G30040.1,AT1G73500.1,AT1G79460.1,AT2G28305.1,AT3G45140.1,AT3G48520.1,AT4G31500.1,AT5G12330.4,AT5G63450.1	CYP83B1,CYP94B1,CYP94B3,GA2,GA2OX2,GA2OX6,LOG1,LOX2,LRP1,MKK9,NLA
	GO:0006725	cellular aromatic compound metabolic process	86	4074	0.0062	AT1G01970.1,AT1G02860.1,AT1G07090.1,AT1G09340.1,AT1G09570.1,AT1G12780.1,AT1G13700.1,AT1G14790.1,AT1G15340.1,AT1G19210.1,AT1G19850.1,AT1G27730.1,AT1G30610.1,AT1G33060.2,AT1G46480.1,AT1G50420.1,AT1G52150.2,AT1G63100.1,AT1G66350.1,AT1G68360.1,AT1G68760.1,AT1G73500.1,AT2G18500.1,AT2G22540.1,AT2G27230.2,AT2G28305.1,AT2G28510.1,AT2G29630.2,AT2G31160.1,AT2G32100.1,AT2G33310.2,AT2G33620.2,AT2G34140.1,AT2…	ADA2A,ANT,AO,APT5,AT1G01970,AT1G19210,AT1G63100,AT1G68360,AT2G28510,AT2G33620,AT2G34140,AT2G41710,AT3G51950,AT5G10690,AT5G51190,AT5G58330,AT5G66770,ATHB-15,ATHB-7,At5g17990,BLH1,CRB,CRD1,CSP41A,CYP83B1,DHS1,DHS2,EBP,EMB2279,EMB976,ERF-1,ERF4,ERF71,FBA2,FOLB2,HSF3,HSFA3,HSFA4A,IAA13,IAA27,IDD2,LAC5,LHW,LOG1,LSH10,LSH3,LSH6,MBD10,MKK9,MP,MYB15,MYB84,NAC014,NLA,NUDX1,OFP16,OFP7,OTP84,PBRP,PC-MYB1,PD…
	GO:0009642	response to light intensity	9	142	0.0066	AT1G01470.1,AT1G09570.1,AT1G27730.1,AT2G17840.1,AT3G50820.1,AT4G15920.1,AT5G18170.1,AT5G20230.1,AT5G46110.4	APE2,BCB,ERD7,GDH1,LEA14,PHYA,PSBO2,STZ,SWEET17
	GO:0031324	negative regulation of cellular metabolic process	15	365	0.0085	AT1G09570.1,AT1G11580.1,AT1G27730.1,AT2G18500.1,AT2G22540.1,AT2G32100.1,AT2G34140.1,AT3G12490.2,AT3G15210.1,AT3G50820.1,AT3G56400.1,AT4G32730.2,AT5G02810.1,AT5G40460.1,AT5G47550.1	AT2G34140,AT5G40460,AT5G47550,CYSB,ERF4,OFP16,OFP7,PC-MYB1,PHYA,PMEPCRA,PRR7,PSBO2,STZ,SVP,WRKY70
	GO:2000113	negative regulation of cellular macromolecule biosynthetic process	11	215	0.0085	AT1G09570.1,AT1G11580.1,AT1G27730.1,AT2G18500.1,AT2G22540.1,AT2G32100.1,AT2G34140.1,AT3G15210.1,AT3G56400.1,AT4G32730.2,AT5G02810.1	AT2G34140,ERF4,OFP16,OFP7,PC-MYB1,PHYA,PMEPCRA,PRR7,STZ,SVP,WRKY70
	GO:0032502	developmental process	57	2492	0.0114	AT1G02730.1,AT1G07090.1,AT1G09570.1,AT1G12430.2,AT1G19850.1,AT1G21410.1,AT1G23380.2,AT1G27730.1,AT1G28330.5,AT1G30610.1,AT1G46480.1,AT1G52150.2,AT1G60420.1,AT1G66350.1,AT1G68360.1,AT1G72520.1,AT1G73500.1,AT1G73590.1,AT2G01820.1,AT2G03090.1,AT2G22540.1,AT2G26910.1,AT2G27230.2,AT2G31160.1,AT2G34140.1,AT2G34710.1,AT2G35940.3,AT2G39730.1,AT2G41710.3,AT2G42610.1,AT2G47620.1,AT3G23250.1,AT3G23580.1,AT3…	ABCG32,ANT,ARK3,AT1G60420,AT1G68360,AT2G01820,AT2G34140,AT2G41710,ATHB-15,BAG4,BLH1,CINV2,CSLA02,CSLD5,CYCD3;1,CYP83B1,CYP94B3,CaS,DYL1,EMB2279,ERF-1,EXPA15,EXPB3,IAMT1,INV-E,KNAT1,KNAT6,LHW,LOX4,LRP1,LSH10,LSH3,LSH6,MGD1,MKK9,MP,MPA24.5,MYB15,MYB84,PA2,PC-MYB1,PHB,PHYA,PIN1,PTL,PXY,RCA,REV,RGL1,RNR2A,SKP2A,STZ,SVP,SWI3A,TRN2,WOX13,WOX4
	GO:0051172	negative regulation of nitrogen compound metabolic process	14	337	0.0114	AT1G09570.1,AT1G11580.1,AT1G27730.1,AT2G18500.1,AT2G22540.1,AT2G32100.1,AT2G34140.1,AT3G12490.2,AT3G15210.1,AT3G56400.1,AT4G32730.2,AT5G02810.1,AT5G40460.1,AT5G47550.1	AT2G34140,AT5G40460,AT5G47550,CYSB,ERF4,OFP16,OFP7,PC-MYB1,PHYA,PMEPCRA,PRR7,STZ,SVP,WRKY70
	GO:0071555	cell wall organization	18	503	0.0114	AT1G02730.1,AT1G11580.1,AT1G12780.1,AT2G03090.1,AT2G36870.1,AT3G28340.1,AT3G58790.1,AT4G02290.1,AT4G03210.1,AT4G20170.1,AT4G28250.1,AT4G31500.1,AT4G33220.1,AT5G13000.1,AT5G22740.1,AT5G26670.1,AT5G46330.1,AT5G56590.1	AT5G26670,AT5G56590,At5g46330,CSLA02,CSLD5,CYP83B1,EXPA15,EXPB3,GALS3,GATL10,GAUT15,GH9B13,GSL12,PME44,PMEPCRA,UGE1,XTH32,XTH9
	GO:0042446	hormone biosynthetic process	9	157	0.0122	AT1G02400.1,AT1G02860.1,AT1G30040.1,AT1G73500.1,AT1G79460.1,AT2G28305.1,AT3G45140.1,AT4G31500.1,AT5G12330.4	CYP83B1,GA2,GA2OX2,GA2OX6,LOG1,LOX2,LRP1,MKK9,NLA
	GO:0007389	pattern specification process	9	158	0.0125	AT1G19850.1,AT1G73590.1,AT2G31160.1,AT2G34710.1,AT4G08150.1,AT5G03680.1,AT5G46700.1,AT5G55250.1,AT5G60690.1	IAMT1,KNAT1,LSH3,MP,PHB,PIN1,PTL,REV,TRN2
	GO:0009753	response to jasmonic acid	10	192	0.0125	AT1G61340.2,AT2G39730.1,AT3G15210.1,AT3G16770.1,AT3G23250.1,AT3G45140.1,AT3G56400.1,AT4G19810.1,AT5G46050.1,AT5G67480.2	BT4,ChiC,EBP,ERF4,FBS1,LOX2,MYB15,PTR3,RCA,WRKY70
	GO:0043436	oxoacid metabolic process	28	973	0.0125	AT1G02400.1,AT1G02860.1,AT1G11840.6,AT1G18590.1,AT1G30040.1,AT1G68360.1,AT1G69870.1,AT1G72520.1,AT1G79460.1,AT2G26250.1,AT3G16170.1,AT3G45140.1,AT3G48520.1,AT3G62130.1,AT4G31500.1,AT4G33510.1,AT4G36830.1,AT4G37750.1,AT4G37930.1,AT4G38970.1,AT4G39980.1,AT5G17990.1,AT5G18170.1,AT5G56760.1,AT5G58330.1,AT5G60540.1,AT5G62980.1,AT5G63450.1	AAE13,ANT,AT1G68360,AT5G58330,At5g17990,CYP83B1,CYP94B1,CYP94B3,DHS1,DHS2,FBA2,FOLB2,GA2,GA2OX2,GA2OX6,GDH1,GLX1,HOS3-1,KCS10,LCD,LOX2,LOX4,NLA,NRT1.7,PDX2,SERAT1;1,SHM1,SOT17
	GO:0033993	response to lipid	22	691	0.0127	AT1G22690.1,AT1G27730.1,AT1G50420.1,AT1G61340.2,AT1G66350.1,AT1G68360.1,AT1G74520.1,AT1G79460.1,AT2G17840.1,AT2G35940.3,AT2G46680.1,AT2G46820.1,AT3G15210.1,AT4G08950.1,AT4G19810.1,AT4G36830.1,AT4G38970.1,AT5G14920.1,AT5G46050.1,AT5G61210.1,AT5G63980.1,AT5G67480.2	AT1G22690,AT1G68360,AT5G14920,ATHB-7,BLH1,BT4,ChiC,ERD7,ERF4,EXO,FBA2,FBS1,GA2,HOS3-1,HVA22A,PSI-P,PTR3,RGL1,SAL1,SCL3,SNAP33,STZ
	GO:0007165	signal transduction	38	1487	0.0131	AT1G09570.1,AT1G19210.1,AT1G19850.1,AT1G21410.1,AT1G22690.1,AT1G46480.1,AT1G66350.1,AT1G68360.1,AT1G72180.1,AT1G73500.1,AT1G73590.1,AT1G79460.1,AT1G80870.1,AT2G01820.1,AT2G05940.1,AT2G17220.1,AT2G28930.1,AT2G33310.2,AT2G41710.3,AT2G47520.1,AT3G15210.1,AT3G16770.1,AT3G50930.1,AT3G56400.1,AT3G59350.1,AT4G17500.1,AT4G29080.1,AT4G35020.2,AT5G02810.1,AT5G12330.4,AT5G14920.1,AT5G16000.1,AT5G24470.1,AT5…	AT1G19210,AT1G22690,AT1G68360,AT1G72180,AT1G80870,AT2G01820,AT2G41710,AT3G59350,AT5G14920,AT5G51190,At5g46330,BCS1,EBP,ERF-1,ERF4,ERF71,GA2,IAA13,IAA27,Kin3,LRP1,MKK9,MP,NIK1,PHYA,PIN1,PK1B,PRR5,PRR7,RAC3,RBOHD,RGL1,RIPK,SAL1,SKP2A,TRN2,WOX4,WRKY70
	GO:0009798	axis specification	5	46	0.0131	AT1G19850.1,AT2G34710.1,AT5G03680.1,AT5G55250.1,AT5G60690.1	IAMT1,MP,PHB,PTL,REV
	GO:0019684	photosynthesis, light reaction	7	98	0.0131	AT1G08380.1,AT1G54780.1,AT1G75690.1,AT2G46820.1,AT3G08940.2,AT3G50820.1,AT4G03280.1	LHCB4.2,LQY1,PETC,PSAO,PSBO2,PSI-P,TLP18.3
	GO:0009409	response to cold	14	347	0.0132	AT1G09340.1,AT1G27730.1,AT1G74520.1,AT2G17840.1,AT2G26250.1,AT2G38470.1,AT2G39730.1,AT3G12490.2,AT3G23250.1,AT3G51780.1,AT4G15920.1,AT4G17090.1,AT4G37930.1,AT5G20230.1	BAG4,BCB,CRB,CT-BMY,CYSB,ERD7,HVA22A,KCS10,MYB15,RCA,SHM1,STZ,SWEET17,WRKY33
	GO:0006073	cellular glucan metabolic process	10	196	0.0134	AT1G02730.1,AT1G27680.1,AT2G36870.1,AT2G39930.1,AT3G55800.1,AT4G02290.1,AT4G03210.1,AT4G17090.1,AT5G13000.1,AT5G22510.1	APL2,CSLD5,CT-BMY,GH9B13,GSL12,INV-E,ISA1,SBPASE,XTH32,XTH9
	GO:0000160	phosphorelay signal transduction system	11	233	0.0136	AT1G09570.1,AT1G19210.1,AT1G73500.1,AT2G41710.3,AT2G47520.1,AT3G15210.1,AT3G16770.1,AT4G17500.1,AT5G02810.1,AT5G24470.1,AT5G51190.1	AT1G19210,AT2G41710,AT5G51190,EBP,ERF-1,ERF4,ERF71,MKK9,PHYA,PRR5,PRR7
	GO:0003002	regionalization	8	130	0.0136	AT1G19850.1,AT1G73590.1,AT2G31160.1,AT2G34710.1,AT4G08150.1,AT5G46700.1,AT5G55250.1,AT5G60690.1	IAMT1,KNAT1,LSH3,MP,PHB,PIN1,REV,TRN2
	GO:0006468	protein phosphorylation	24	798	0.0144	AT1G09570.1,AT1G55610.2,AT1G70520.1,AT1G72180.1,AT1G73500.1,AT1G80870.1,AT2G01820.1,AT2G05940.1,AT2G17220.1,AT2G24130.1,AT2G28930.1,AT2G36570.1,AT2G41890.1,AT2G48010.1,AT3G53380.1,AT3G59350.1,AT4G03230.1,AT4G08850.1,AT5G16000.1,AT5G24010.1,AT5G46330.1,AT5G47850.1,AT5G61480.1,AT5G65700.2	AT1G72180,AT1G80870,AT2G01820,AT2G24130,AT2G36570,AT2G41890,AT3G53380,AT3G59350,AT4G03230,AT4G08850,AT5G24010,At5g46330,BRL1,CCR4,CRK2,Kin3,MKK9,MPA24.5,NIK1,PHYA,PK1B,PXY,RIPK,RKF3
	GO:0007178	transmembrane receptor protein serine/threonine kinase signaling pathway	8	132	0.0144	AT1G80870.1,AT2G01820.1,AT2G05940.1,AT2G17220.1,AT2G28930.1,AT3G59350.1,AT5G16000.1,AT5G46330.1	AT1G80870,AT2G01820,AT3G59350,At5g46330,Kin3,NIK1,PK1B,RIPK
	GO:0046483	heterocycle metabolic process	82	3980	0.0144	AT1G01970.1,AT1G07090.1,AT1G09340.1,AT1G09570.1,AT1G12780.1,AT1G13700.1,AT1G14790.1,AT1G15340.1,AT1G19210.1,AT1G19850.1,AT1G27730.1,AT1G30610.1,AT1G33060.2,AT1G46480.1,AT1G50420.1,AT1G52150.2,AT1G63100.1,AT1G66350.1,AT1G68360.1,AT1G68760.1,AT1G73500.1,AT2G18500.1,AT2G22540.1,AT2G27230.2,AT2G28305.1,AT2G28510.1,AT2G29630.2,AT2G31160.1,AT2G32100.1,AT2G33310.2,AT2G33620.2,AT2G34140.1,AT2G34710.1,AT2…	ADA2A,ANT,AO,APT5,AT1G01970,AT1G19210,AT1G63100,AT1G68360,AT2G28510,AT2G33620,AT2G34140,AT2G41710,AT3G51950,AT5G10690,AT5G51190,AT5G58330,AT5G66770,ATHB-15,ATHB-7,At5g17990,BLH1,CRB,CRD1,CSP41A,CYP83B1,EBP,EMB2279,EMB976,ERF-1,ERF4,ERF71,FBA2,FOLB2,HSF3,HSFA3,HSFA4A,IAA13,IAA27,IDD2,LHW,LOG1,LSH10,LSH3,LSH6,MBD10,MKK9,MP,MYB15,MYB84,NAC014,NUDX1,OFP16,OFP7,OTP84,PBRP,PC-MYB1,PDX2,PGL1,PHB,PHYA,PR…
	GO:1901360	organic cyclic compound metabolic process	85	4160	0.0144	AT1G01970.1,AT1G02860.1,AT1G07090.1,AT1G09340.1,AT1G09570.1,AT1G12780.1,AT1G13700.1,AT1G14790.1,AT1G15340.1,AT1G19210.1,AT1G19850.1,AT1G27730.1,AT1G30610.1,AT1G33060.2,AT1G46480.1,AT1G50420.1,AT1G52150.2,AT1G63100.1,AT1G66350.1,AT1G68360.1,AT1G68760.1,AT1G73500.1,AT2G18500.1,AT2G22540.1,AT2G27230.2,AT2G28510.1,AT2G29630.2,AT2G31160.1,AT2G32100.1,AT2G33310.2,AT2G33620.2,AT2G34140.1,AT2G34710.1,AT2…	ADA2A,ANT,AO,APT5,AT1G01970,AT1G19210,AT1G63100,AT1G68360,AT2G28510,AT2G33620,AT2G34140,AT2G41710,AT3G51950,AT5G10690,AT5G51190,AT5G58330,AT5G66770,ATHB-15,ATHB-7,At5g17990,BLH1,CRB,CRD1,CSP41A,CYP83B1,DHS1,DHS2,EBP,EMB2279,EMB976,ERF-1,ERF4,ERF71,FBA2,FOLB2,HSF3,HSFA3,HSFA4A,IAA13,IAA27,IDD2,LAC5,LHW,LSH10,LSH3,LSH6,MBD10,MKK9,MP,MYB15,MYB84,NAC014,NLA,NUDX1,OFP16,OFP7,OTP84,PBRP,PC-MYB1,PDX2,PG…
	GO:0032870	cellular response to hormone stimulus	25	857	0.0164	AT1G19210.1,AT1G19850.1,AT1G21410.1,AT1G22690.1,AT1G66350.1,AT1G68360.1,AT1G73500.1,AT1G73590.1,AT1G79460.1,AT2G33310.2,AT2G41710.3,AT2G47520.1,AT3G15210.1,AT3G16770.1,AT3G50930.1,AT3G56400.1,AT4G17500.1,AT4G29080.1,AT4G35020.2,AT4G36830.1,AT5G12330.4,AT5G14920.1,AT5G46700.1,AT5G51190.1,AT5G63980.1	AT1G19210,AT1G22690,AT1G68360,AT2G41710,AT5G14920,AT5G51190,BCS1,EBP,ERF-1,ERF4,ERF71,GA2,HOS3-1,IAA13,IAA27,LRP1,MKK9,MP,PIN1,RAC3,RGL1,SAL1,SKP2A,TRN2,WRKY70
	GO:0010201	response to continuous far red light stimulus by the high-irradiance response system	2	2	0.0165	AT1G09570.1,AT2G35940.3	BLH1,PHYA
	GO:0032501	multicellular organismal process	53	2336	0.0167	AT1G02730.1,AT1G07090.1,AT1G09570.1,AT1G12430.2,AT1G19850.1,AT1G21410.1,AT1G23380.2,AT1G27730.1,AT1G28330.5,AT1G30610.1,AT1G46480.1,AT1G60420.1,AT1G66350.1,AT1G68360.1,AT1G72520.1,AT1G73500.1,AT1G73590.1,AT2G01820.1,AT2G22540.1,AT2G26910.1,AT2G27230.2,AT2G31160.1,AT2G34140.1,AT2G34710.1,AT2G35940.3,AT2G39730.1,AT2G41710.3,AT2G41890.1,AT2G42610.1,AT2G47620.1,AT3G23580.1,AT3G48520.1,AT3G49690.1,AT3…	ABCG32,ANT,ARK3,AT1G60420,AT1G68360,AT2G01820,AT2G34140,AT2G41710,AT2G41890,AT4G03230,BAG4,BLH1,CINV2,CSLA02,CSLD5,CYCD3;1,CYP83B1,CYP94B3,CaS,DYL1,EMB2279,IAMT1,INV-E,KNAT1,KNAT6,LHW,LOX4,LRP1,LSH10,LSH3,LSH6,MGD1,MKK9,MP,MPA24.5,MYB84,PA2,PHB,PHYA,PIN1,PTL,PXY,RCA,REV,RGL1,RNR2A,SKP2A,STZ,SVP,SWI3A,TRN2,WOX13,WOX4
	GO:0016052	carbohydrate catabolic process	11	244	0.0173	AT1G09340.1,AT1G11580.1,AT2G39930.1,AT3G53190.1,AT4G02290.1,AT4G09510.1,AT4G17090.1,AT4G19810.1,AT4G33220.1,AT4G38970.1,AT5G22510.1	AT3G53190,CINV2,CRB,CT-BMY,ChiC,FBA2,GH9B13,INV-E,ISA1,PME44,PMEPCRA
	GO:0045892	negative regulation of transcription, DNA-templated	9	172	0.0176	AT1G27730.1,AT2G18500.1,AT2G22540.1,AT2G32100.1,AT2G34140.1,AT3G15210.1,AT3G56400.1,AT4G32730.2,AT5G02810.1	AT2G34140,ERF4,OFP16,OFP7,PC-MYB1,PRR7,STZ,SVP,WRKY70
	GO:0009755	hormone-mediated signaling pathway	23	777	0.0199	AT1G19210.1,AT1G19850.1,AT1G21410.1,AT1G22690.1,AT1G66350.1,AT1G68360.1,AT1G73500.1,AT1G73590.1,AT1G79460.1,AT2G33310.2,AT2G41710.3,AT2G47520.1,AT3G15210.1,AT3G16770.1,AT3G56400.1,AT4G17500.1,AT4G29080.1,AT4G35020.2,AT5G12330.4,AT5G14920.1,AT5G46700.1,AT5G51190.1,AT5G63980.1	AT1G19210,AT1G22690,AT1G68360,AT2G41710,AT5G14920,AT5G51190,EBP,ERF-1,ERF4,ERF71,GA2,IAA13,IAA27,LRP1,MKK9,MP,PIN1,RAC3,RGL1,SAL1,SKP2A,TRN2,WRKY70
	GO:0048856	anatomical structure development	53	2361	0.0199	AT1G02730.1,AT1G07090.1,AT1G09570.1,AT1G12430.2,AT1G19850.1,AT1G21410.1,AT1G23380.2,AT1G28330.5,AT1G30610.1,AT1G46480.1,AT1G60420.1,AT1G66350.1,AT1G68360.1,AT1G72520.1,AT1G73500.1,AT1G73590.1,AT2G01820.1,AT2G03090.1,AT2G22540.1,AT2G26910.1,AT2G27230.2,AT2G31160.1,AT2G34140.1,AT2G34710.1,AT2G35940.3,AT2G39730.1,AT2G41710.3,AT2G42610.1,AT2G47620.1,AT3G23580.1,AT3G48520.1,AT3G49690.1,AT3G51780.1,AT4…	ABCG32,ANT,ARK3,AT1G60420,AT1G68360,AT2G01820,AT2G34140,AT2G41710,BAG4,BLH1,CINV2,CSLA02,CSLD5,CYCD3;1,CYP83B1,CYP94B3,CaS,DYL1,EMB2279,ERF-1,EXPA15,EXPB3,IAMT1,INV-E,KNAT1,KNAT6,LHW,LOX4,LRP1,LSH10,LSH3,LSH6,MGD1,MKK9,MP,MPA24.5,MYB84,PA2,PHB,PHYA,PIN1,PTL,PXY,RCA,REV,RGL1,RNR2A,SKP2A,SVP,SWI3A,TRN2,WOX13,WOX4
	GO:0005982	starch metabolic process	5	54	0.0204	AT1G27680.1,AT2G39930.1,AT3G55800.1,AT4G17090.1,AT5G22510.1	APL2,CT-BMY,INV-E,ISA1,SBPASE
	GO:0009414	response to water deprivation	12	292	0.0213	AT1G01470.1,AT1G02730.1,AT1G09340.1,AT1G27730.1,AT1G68010.2,AT1G74520.1,AT2G17840.1,AT2G38470.1,AT2G46680.1,AT3G05640.1,AT3G12490.2,AT3G23250.1	AT3G05640,ATHB-7,CRB,CSLD5,CYSB,ERD7,HPR,HVA22A,LEA14,MYB15,STZ,WRKY33
	GO:0006790	sulfur compound metabolic process	13	335	0.0216	AT1G18590.1,AT1G68360.1,AT1G73500.1,AT2G29630.2,AT2G38470.1,AT3G03190.1,AT3G24430.1,AT3G62130.1,AT4G31500.1,AT4G37750.1,AT4G39640.1,AT5G56760.1,AT5G63980.1	ANT,AT1G68360,At4g39640,CYP83B1,GSTF11,HCF101,LCD,MKK9,SAL1,SERAT1;1,SOT17,THIC,WRKY33
	GO:0009299	mRNA transcription	3	14	0.0216	AT1G07090.1,AT2G31160.1,AT2G42610.1	LSH10,LSH3,LSH6
	GO:0016051	carbohydrate biosynthetic process	12	295	0.0216	AT1G02730.1,AT1G12780.1,AT1G12900.1,AT1G27680.1,AT2G39930.1,AT3G28340.1,AT3G55800.1,AT3G58790.1,AT4G17090.1,AT4G37870.1,AT4G38970.1,AT5G13000.1	APL2,CSLD5,CT-BMY,FBA2,GAPA-2,GATL10,GAUT15,GSL12,ISA1,PCK1,SBPASE,UGE1
	GO:0016070	RNA metabolic process	64	3007	0.0216	AT1G01970.1,AT1G07090.1,AT1G09340.1,AT1G09570.1,AT1G14790.1,AT1G15340.1,AT1G19210.1,AT1G19850.1,AT1G27730.1,AT1G30610.1,AT1G33060.2,AT1G46480.1,AT1G50420.1,AT1G52150.2,AT1G63100.1,AT1G66350.1,AT1G68360.1,AT2G18500.1,AT2G22540.1,AT2G27230.2,AT2G28510.1,AT2G31160.1,AT2G32100.1,AT2G33310.2,AT2G33620.2,AT2G34140.1,AT2G34710.1,AT2G35940.3,AT2G38470.1,AT2G39140.1,AT2G41710.3,AT2G42610.1,AT2G46680.1,AT2…	ADA2A,ANT,AT1G01970,AT1G19210,AT1G63100,AT1G68360,AT2G28510,AT2G33620,AT2G34140,AT2G41710,AT5G10690,AT5G51190,AT5G66770,ATHB-15,ATHB-7,BLH1,CRB,CSP41A,EBP,EMB2279,EMB976,ERF-1,ERF4,ERF71,HSF3,HSFA3,HSFA4A,IAA13,IAA27,IDD2,LHW,LSH10,LSH3,LSH6,MBD10,MP,MYB15,MYB84,NAC014,OFP16,OFP7,OTP84,PBRP,PC-MYB1,PHB,PHYA,PRR5,PRR7,PTAC5,PTL,RDR1,REV,RGL1,SCL3,STZ,SVP,SVR1,SWI3A,WOX13,WOX4,WRKY23,WRKY33,WRKY48,…
	GO:0046394	carboxylic acid biosynthetic process	17	506	0.0216	AT1G02400.1,AT1G02860.1,AT1G30040.1,AT1G72520.1,AT1G79460.1,AT2G26250.1,AT3G16170.1,AT3G45140.1,AT4G31500.1,AT4G33510.1,AT4G36830.1,AT4G37930.1,AT4G38970.1,AT4G39980.1,AT5G17990.1,AT5G56760.1,AT5G62980.1	AAE13,At5g17990,CYP83B1,DHS1,DHS2,FBA2,FOLB2,GA2,GA2OX2,GA2OX6,HOS3-1,KCS10,LOX2,LOX4,NLA,SERAT1;1,SHM1
	GO:0048511	rhythmic process	7	112	0.0216	AT1G09340.1,AT2G17840.1,AT3G63140.1,AT4G15920.1,AT4G37930.1,AT5G02810.1,AT5G24470.1	CRB,CSP41A,ERD7,PRR5,PRR7,SHM1,SWEET17
	GO:0010051	xylem and phloem pattern formation	5	57	0.023	AT1G19850.1,AT1G73590.1,AT4G08150.1,AT5G46700.1,AT5G60690.1	KNAT1,MP,PIN1,REV,TRN2
	GO:0044264	cellular polysaccharide metabolic process	11	258	0.023	AT1G02730.1,AT1G12780.1,AT1G27680.1,AT2G36870.1,AT2G39930.1,AT3G55800.1,AT4G02290.1,AT4G03210.1,AT4G17090.1,AT5G13000.1,AT5G22510.1	APL2,CSLD5,CT-BMY,GH9B13,GSL12,INV-E,ISA1,SBPASE,UGE1,XTH32,XTH9
	GO:0009639	response to red or far red light	9	186	0.0252	AT1G02400.1,AT1G09570.1,AT1G30040.1,AT1G73590.1,AT2G35940.3,AT3G08940.2,AT4G31500.1,AT5G02810.1,AT5G23060.1	BLH1,CYP83B1,CaS,GA2OX2,GA2OX6,LHCB4.2,PHYA,PIN1,PRR7
	GO:0007623	circadian rhythm	6	87	0.026	AT1G09340.1,AT2G17840.1,AT3G63140.1,AT4G15920.1,AT4G37930.1,AT5G02810.1	CRB,CSP41A,ERD7,PRR7,SHM1,SWEET17
	GO:0007275	multicellular organism development	48	2127	0.0261	AT1G02730.1,AT1G07090.1,AT1G09570.1,AT1G12430.2,AT1G19850.1,AT1G21410.1,AT1G28330.5,AT1G30610.1,AT1G46480.1,AT1G66350.1,AT1G68360.1,AT1G72520.1,AT1G73500.1,AT1G73590.1,AT2G01820.1,AT2G22540.1,AT2G26910.1,AT2G27230.2,AT2G31160.1,AT2G34140.1,AT2G34710.1,AT2G35940.3,AT2G39730.1,AT2G41710.3,AT2G42610.1,AT2G47620.1,AT3G23580.1,AT3G48520.1,AT3G49690.1,AT3G51780.1,AT4G08150.1,AT4G09510.1,AT4G31500.1,AT4…	ABCG32,ANT,ARK3,AT1G68360,AT2G01820,AT2G34140,AT2G41710,BAG4,BLH1,CINV2,CSLA02,CSLD5,CYCD3;1,CYP83B1,CYP94B3,CaS,DYL1,EMB2279,IAMT1,INV-E,KNAT1,LHW,LOX4,LRP1,LSH10,LSH3,LSH6,MGD1,MKK9,MP,MPA24.5,MYB84,PA2,PHB,PHYA,PIN1,PTL,PXY,RCA,REV,RGL1,RNR2A,SKP2A,SVP,SWI3A,TRN2,WOX13,WOX4
	GO:0009765	photosynthesis, light harvesting	4	35	0.0261	AT1G08380.1,AT1G54780.1,AT1G75690.1,AT3G08940.2	LHCB4.2,LQY1,PSAO,TLP18.3
	GO:0010467	gene expression	62	2929	0.0268	AT1G07090.1,AT1G09340.1,AT1G09570.1,AT1G14790.1,AT1G15340.1,AT1G19210.1,AT1G19850.1,AT1G27730.1,AT1G33060.2,AT1G46480.1,AT1G50420.1,AT1G52150.2,AT1G63100.1,AT1G66350.1,AT1G68360.1,AT1G75350.1,AT2G18500.1,AT2G22540.1,AT2G27230.2,AT2G28510.1,AT2G31160.1,AT2G32100.1,AT2G33310.2,AT2G33620.2,AT2G34140.1,AT2G34710.1,AT2G35940.3,AT2G38470.1,AT2G39140.1,AT2G41710.3,AT2G42610.1,AT2G46680.1,AT2G47260.1,AT2…	ADA2A,ANT,APG3,AT1G19210,AT1G63100,AT1G68360,AT2G28510,AT2G33620,AT2G34140,AT2G41710,AT5G51190,AT5G66770,ATHB-15,ATHB-7,BLH1,CRB,CSP41A,EBP,ERF-1,ERF4,ERF71,HSF3,HSFA3,HSFA4A,IAA13,IAA27,IDD2,LHW,LSH10,LSH3,LSH6,MBD10,MP,MYB15,MYB84,NAC014,OFP16,OFP7,OTP84,PBRP,PC-MYB1,PHB,PHYA,PRR5,PRR7,PTAC5,PTL,RDR1,REV,RGL1,SCL3,STZ,SVP,SVR1,SWI3A,WOX13,WOX4,WRKY23,WRKY33,WRKY48,WRKY70,emb2184
	GO:0019752	carboxylic acid metabolic process	24	863	0.0295	AT1G02400.1,AT1G02860.1,AT1G11840.6,AT1G30040.1,AT1G72520.1,AT1G79460.1,AT2G26250.1,AT3G16170.1,AT3G45140.1,AT3G48520.1,AT3G62130.1,AT4G31500.1,AT4G33510.1,AT4G36830.1,AT4G37930.1,AT4G38970.1,AT4G39980.1,AT5G17990.1,AT5G18170.1,AT5G56760.1,AT5G58330.1,AT5G60540.1,AT5G62980.1,AT5G63450.1	AAE13,AT5G58330,At5g17990,CYP83B1,CYP94B1,CYP94B3,DHS1,DHS2,FBA2,FOLB2,GA2,GA2OX2,GA2OX6,GDH1,GLX1,HOS3-1,KCS10,LCD,LOX2,LOX4,NLA,PDX2,SERAT1;1,SHM1
	GO:0009855	determination of bilateral symmetry	2	4	0.0318	AT2G34710.1,AT5G60690.1	PHB,REV
	GO:0006006	glucose metabolic process	4	38	0.0327	AT1G12900.1,AT3G55800.1,AT4G37870.1,AT4G38970.1	FBA2,GAPA-2,PCK1,SBPASE
	GO:0071310	cellular response to organic substance	26	973	0.0327	AT1G14790.1,AT1G19210.1,AT1G19850.1,AT1G21410.1,AT1G22690.1,AT1G66350.1,AT1G68360.1,AT1G73500.1,AT1G73590.1,AT1G79460.1,AT2G33310.2,AT2G41710.3,AT2G47520.1,AT3G15210.1,AT3G16770.1,AT3G50930.1,AT3G56400.1,AT4G17500.1,AT4G29080.1,AT4G35020.2,AT4G36830.1,AT5G12330.4,AT5G14920.1,AT5G46700.1,AT5G51190.1,AT5G63980.1	AT1G19210,AT1G22690,AT1G68360,AT2G41710,AT5G14920,AT5G51190,BCS1,EBP,ERF-1,ERF4,ERF71,GA2,HOS3-1,IAA13,IAA27,LRP1,MKK9,MP,PIN1,RAC3,RDR1,RGL1,SAL1,SKP2A,TRN2,WRKY70
	GO:0006094	gluconeogenesis	3	18	0.034	AT3G55800.1,AT4G37870.1,AT4G38970.1	FBA2,PCK1,SBPASE
	GO:0009908	flower development	14	404	0.0344	AT1G19850.1,AT1G66350.1,AT1G72520.1,AT1G73590.1,AT2G22540.1,AT2G31160.1,AT2G34140.1,AT2G34710.1,AT3G48520.1,AT4G37750.1,AT5G03680.1,AT5G06720.1,AT5G12330.4,AT5G65700.2	ANT,AT2G34140,CYP94B3,LOX4,LRP1,LSH3,MP,MPA24.5,PA2,PHB,PIN1,PTL,RGL1,SVP
	GO:0051253	negative regulation of RNA metabolic process	9	198	0.0344	AT1G27730.1,AT2G18500.1,AT2G22540.1,AT2G32100.1,AT2G34140.1,AT3G15210.1,AT3G56400.1,AT4G32730.2,AT5G02810.1	AT2G34140,ERF4,OFP16,OFP7,PC-MYB1,PRR7,STZ,SVP,WRKY70
	GO:0009892	negative regulation of metabolic process	17	540	0.0345	AT1G05460.1,AT1G09570.1,AT1G11580.1,AT1G14790.1,AT1G27730.1,AT2G18500.1,AT2G22540.1,AT2G32100.1,AT2G34140.1,AT3G12490.2,AT3G15210.1,AT3G50820.1,AT3G56400.1,AT4G32730.2,AT5G02810.1,AT5G40460.1,AT5G47550.1	AT2G34140,AT5G40460,AT5G47550,CYSB,ERF4,OFP16,OFP7,PC-MYB1,PHYA,PMEPCRA,PRR7,PSBO2,RDR1,SDE3,STZ,SVP,WRKY70
	GO:0071554	cell wall organization or biogenesis	19	639	0.0372	AT1G02730.1,AT1G11580.1,AT1G12780.1,AT2G03090.1,AT2G36570.1,AT2G36870.1,AT3G28340.1,AT3G58790.1,AT4G02290.1,AT4G03210.1,AT4G20170.1,AT4G28250.1,AT4G31500.1,AT4G33220.1,AT5G13000.1,AT5G22740.1,AT5G26670.1,AT5G46330.1,AT5G56590.1	AT2G36570,AT5G26670,AT5G56590,At5g46330,CSLA02,CSLD5,CYP83B1,EXPA15,EXPB3,GALS3,GATL10,GAUT15,GH9B13,GSL12,PME44,PMEPCRA,UGE1,XTH32,XTH9
	GO:0009739	response to gibberellin	7	129	0.0373	AT1G22690.1,AT1G50420.1,AT1G66350.1,AT1G68360.1,AT1G79460.1,AT5G14920.1,AT5G67480.2	AT1G22690,AT1G68360,AT5G14920,BT4,GA2,RGL1,SCL3
	GO:0010605	negative regulation of macromolecule metabolic process	16	499	0.0373	AT1G05460.1,AT1G09570.1,AT1G11580.1,AT1G14790.1,AT1G27730.1,AT2G18500.1,AT2G22540.1,AT2G32100.1,AT2G34140.1,AT3G12490.2,AT3G15210.1,AT3G56400.1,AT4G32730.2,AT5G02810.1,AT5G40460.1,AT5G47550.1	AT2G34140,AT5G40460,AT5G47550,CYSB,ERF4,OFP16,OFP7,PC-MYB1,PHYA,PMEPCRA,PRR7,RDR1,SDE3,STZ,SVP,WRKY70
	GO:0034641	cellular nitrogen compound metabolic process	85	4363	0.0384	AT1G01970.1,AT1G07090.1,AT1G09340.1,AT1G09570.1,AT1G12780.1,AT1G13700.1,AT1G14790.1,AT1G15340.1,AT1G19210.1,AT1G19850.1,AT1G27730.1,AT1G30610.1,AT1G33060.2,AT1G46480.1,AT1G50420.1,AT1G52150.2,AT1G63100.1,AT1G66350.1,AT1G68360.1,AT1G68760.1,AT1G73500.1,AT1G75350.1,AT2G18500.1,AT2G22540.1,AT2G27230.2,AT2G28510.1,AT2G29630.2,AT2G31160.1,AT2G32100.1,AT2G33310.2,AT2G33620.2,AT2G34140.1,AT2G34710.1,AT2…	ADA2A,ANT,AO,APG3,APT5,AT1G01970,AT1G19210,AT1G63100,AT1G68360,AT2G28510,AT2G33620,AT2G34140,AT2G41710,AT3G51950,AT5G10690,AT5G51190,AT5G58330,AT5G66770,ATHB-15,ATHB-7,At4g39640,At5g17990,BLH1,CRB,CRD1,CSP41A,CYP83B1,EBP,EMB2279,EMB976,ERF-1,ERF4,ERF71,FBA2,FOLB2,GSTF11,HSF3,HSFA3,HSFA4A,IAA13,IAA27,IDD2,LHW,LSH10,LSH3,LSH6,MBD10,MKK9,MP,MYB15,MYB84,NAC014,NUDX1,OFP16,OFP7,OTP84,PBRP,PC-MYB1,PDX2…
	GO:0009073	aromatic amino acid family biosynthetic process	4	41	0.0395	AT4G31500.1,AT4G33510.1,AT4G39980.1,AT5G17990.1	At5g17990,CYP83B1,DHS1,DHS2
	GO:0009751	response to salicylic acid	8	167	0.0401	AT1G02860.1,AT1G14790.1,AT1G61340.2,AT3G49690.1,AT3G50930.1,AT3G56400.1,AT5G46050.1,AT5G67480.2	BCS1,BT4,FBS1,MYB84,NLA,PTR3,RDR1,WRKY70
	GO:0000272	polysaccharide catabolic process	8	168	0.0404	AT1G09340.1,AT1G11580.1,AT2G39930.1,AT3G53190.1,AT4G02290.1,AT4G17090.1,AT4G19810.1,AT4G33220.1	AT3G53190,CRB,CT-BMY,ChiC,GH9B13,ISA1,PME44,PMEPCRA
	GO:0005987	sucrose catabolic process	2	5	0.0404	AT4G09510.1,AT5G22510.1	CINV2,INV-E
	GO:0010629	negative regulation of gene expression	13	371	0.0404	AT1G05460.1,AT1G09570.1,AT1G11580.1,AT1G14790.1,AT1G27730.1,AT2G18500.1,AT2G22540.1,AT2G32100.1,AT2G34140.1,AT3G15210.1,AT3G56400.1,AT4G32730.2,AT5G02810.1	AT2G34140,ERF4,OFP16,OFP7,PC-MYB1,PHYA,PMEPCRA,PRR7,RDR1,SDE3,STZ,SVP,WRKY70
	GO:0042549	photosystem II stabilization	2	5	0.0404	AT2G30570.1,AT3G50820.1	PSBO2,PSBW
	GO:0009056	catabolic process	37	1587	0.0416	AT1G02400.1,AT1G02860.1,AT1G09340.1,AT1G11580.1,AT1G11840.6,AT1G15000.1,AT1G21410.1,AT1G49850.1,AT1G68760.1,AT2G33770.1,AT2G36870.1,AT2G39930.1,AT2G40370.1,AT2G41540.2,AT2G41680.1,AT3G03190.1,AT3G03310.1,AT3G16170.1,AT3G16720.1,AT3G20015.1,AT3G53190.1,AT3G54950.1,AT3G62130.1,AT4G02290.1,AT4G09010.1,AT4G09510.1,AT4G17090.1,AT4G19810.1,AT4G33220.1,AT4G38970.1,AT4G39640.1,AT5G06720.1,AT5G08260.1,AT5…	AAE13,AT1G49850,AT3G20015,AT3G53190,AT5G14450,AT5G40250,ATL2,At4g39640,BT4,CINV2,CRB,CT-BMY,ChiC,FBA2,GA2OX6,GH9B13,GLX1,GPDHC1,GSTF11,INV-E,ISA1,LAC5,LCAT3,LCD,NLA,NTRC,NUDX1,PA2,PHO2,PLP7,PME44,PMEPCRA,SKP2A,TL29,XTH32,scpl35,scpl50
	GO:0033554	cellular response to stress	22	800	0.0422	AT1G02860.1,AT1G09340.1,AT1G68010.2,AT1G68760.1,AT1G73500.1,AT2G33770.1,AT2G38470.1,AT2G41680.1,AT3G07700.3,AT3G15360.1,AT3G23580.1,AT3G50930.1,AT3G51030.1,AT4G09010.1,AT4G15920.1,AT4G31500.1,AT4G37870.1,AT4G37930.1,AT5G20230.1,AT5G46330.1,AT5G47550.1,AT5G47910.1	AT3G07700,AT5G47550,At5g46330,BCB,BCS1,CRB,CYP83B1,HPR,MKK9,NLA,NTRC,NUDX1,PCK1,PHO2,RBOHD,RNR2A,SHM1,SWEET17,TL29,TRX-M4,TRX1,WRKY33
	GO:0044275	cellular carbohydrate catabolic process	5	70	0.0427	AT2G39930.1,AT4G02290.1,AT4G09510.1,AT4G17090.1,AT5G22510.1	CINV2,CT-BMY,GH9B13,INV-E,ISA1
	GO:1901575	organic substance catabolic process	33	1377	0.0439	AT1G02400.1,AT1G02860.1,AT1G09340.1,AT1G11580.1,AT1G11840.6,AT1G15000.1,AT1G21410.1,AT1G49850.1,AT1G68760.1,AT2G33770.1,AT2G36870.1,AT2G39930.1,AT2G40370.1,AT2G41540.2,AT3G03310.1,AT3G16170.1,AT3G16720.1,AT3G20015.1,AT3G53190.1,AT3G54950.1,AT3G62130.1,AT4G02290.1,AT4G09510.1,AT4G17090.1,AT4G19810.1,AT4G33220.1,AT4G38970.1,AT4G39640.1,AT5G08260.1,AT5G14450.1,AT5G22510.1,AT5G40250.1,AT5G67480.2	AAE13,AT1G49850,AT3G20015,AT3G53190,AT5G14450,AT5G40250,ATL2,At4g39640,BT4,CINV2,CRB,CT-BMY,ChiC,FBA2,GA2OX6,GH9B13,GLX1,GPDHC1,INV-E,ISA1,LAC5,LCAT3,LCD,NLA,NUDX1,PHO2,PLP7,PME44,PMEPCRA,SKP2A,XTH32,scpl35,scpl50
	GO:0048523	negative regulation of cellular process	17	561	0.0443	AT1G09570.1,AT1G11580.1,AT1G27730.1,AT1G66350.1,AT2G18500.1,AT2G22540.1,AT2G32100.1,AT2G34140.1,AT3G12490.2,AT3G15210.1,AT3G50820.1,AT3G56400.1,AT4G32730.2,AT5G02810.1,AT5G40460.1,AT5G47550.1,AT5G47910.1	AT2G34140,AT5G40460,AT5G47550,CYSB,ERF4,OFP16,OFP7,PC-MYB1,PHYA,PMEPCRA,PRR7,PSBO2,RBOHD,RGL1,STZ,SVP,WRKY70
	GO:0006970	response to osmotic stress	17	564	0.0461	AT1G02730.1,AT1G27730.1,AT1G61340.2,AT1G72180.1,AT1G73500.1,AT1G74520.1,AT2G17840.1,AT2G38470.1,AT3G12490.2,AT3G23250.1,AT3G51780.1,AT4G19810.1,AT5G14920.1,AT5G18170.1,AT5G46050.1,AT5G47910.1,AT5G67480.2	AT1G72180,AT5G14920,BAG4,BT4,CSLD5,CYSB,ChiC,ERD7,FBS1,GDH1,HVA22A,MKK9,MYB15,PTR3,RBOHD,STZ,WRKY33
	GO:0009735	response to cytokinin	9	212	0.0461	AT1G20020.1,AT1G52230.1,AT1G68360.1,AT3G08940.2,AT3G15360.1,AT3G16770.1,AT3G63140.1,AT4G34160.1,AT5G23120.1	AT1G68360,CSP41A,CYCD3;1,EBP,FNR2,HCF136,LHCB4.2,PSAH2,TRX-M4
	GO:0046677	response to antibiotic	10	253	0.0467	AT1G02860.1,AT1G14790.1,AT1G61340.2,AT1G70520.1,AT1G72520.1,AT3G49690.1,AT3G50930.1,AT3G56400.1,AT5G46050.1,AT5G67480.2	BCS1,BT4,CRK2,FBS1,LOX4,MYB84,NLA,PTR3,RDR1,WRKY70
	GO:0009740	gibberellic acid mediated signaling pathway	5	73	0.0484	AT1G22690.1,AT1G66350.1,AT1G68360.1,AT1G79460.1,AT5G14920.1	AT1G22690,AT1G68360,AT5G14920,GA2,RGL1
	GO:0010196	nonphotochemical quenching	2	6	0.0484	AT1G56500.1,AT4G03280.1	AT1G56500,PETC
	GO:0034059	response to anoxia	2	6	0.0484	AT2G47520.1,AT4G33070.1	AT4G33070,ERF71
	GO:0042435	indole-containing compound biosynthetic process	4	45	0.0484	AT1G73500.1,AT2G38470.1,AT4G31500.1,AT5G17990.1	At5g17990,CYP83B1,MKK9,WRKY33
	MOLECULAR FUNCTION, GO-terms significantly enriched
	#term ID	term description	observed gene count	background gene count	false discovery rate	matching proteins in your network (IDs)	matching proteins in your network (labels)
	GO:0003824	catalytic activity	160	7239	2.94e-06	AT1G01970.1,AT1G02400.1,AT1G02730.1,AT1G02860.1,AT1G05460.1,AT1G09340.1,AT1G09570.1,AT1G11580.1,AT1G11840.6,AT1G12430.2,AT1G12780.1,AT1G12900.1,AT1G13700.1,AT1G14790.1,AT1G15000.1,AT1G17650.1,AT1G18590.1,AT1G20020.1,AT1G21410.1,AT1G23360.1,AT1G24330.1,AT1G27680.1,AT1G29340.1,AT1G30040.1,AT1G30610.1,AT1G31800.1,AT1G33170.1,AT1G49850.1,AT1G54780.1,AT1G55510.1,AT1G55610.2,AT1G56500.1,AT1G60420.1,AT1…	AAE13,ABCB2,ABCG32,AO,APL2,APT5,ARASP,ARK3,AT1G01970,AT1G24330,AT1G33170,AT1G49850,AT1G56500,AT1G60420,AT1G72180,AT1G72250,AT1G75280,AT1G80870,AT2G01820,AT2G16890,AT2G24130,AT2G36570,AT2G41890,AT3G05640,AT3G07700,AT3G20015,AT3G51950,AT3G53190,AT3G53380,AT3G57030,AT3G59350,AT3G62260,AT4G03230,AT4G08850,AT4G20430,AT4G33070,AT5G10690,AT5G14450,AT5G16990,AT5G24010,AT5G26670,AT5G40250,AT5G56590,AT5G58…
	GO:0005488	binding	176	8611	5.15e-05	AT1G01970.1,AT1G02400.1,AT1G02860.1,AT1G05460.1,AT1G07090.1,AT1G09340.1,AT1G09570.1,AT1G11840.6,AT1G12430.2,AT1G12900.1,AT1G14790.1,AT1G15340.1,AT1G16070.2,AT1G17650.1,AT1G19210.1,AT1G19850.1,AT1G20020.1,AT1G23380.2,AT1G27680.1,AT1G27730.1,AT1G30040.1,AT1G30610.1,AT1G31800.1,AT1G33060.2,AT1G46480.1,AT1G49850.1,AT1G50420.1,AT1G52150.2,AT1G55610.2,AT1G56500.1,AT1G63100.1,AT1G66350.1,AT1G68010.2,AT1…	ABCB2,ABCG32,ADA2A,ADF5,ADR1-L1,ANT,APG3,APL2,ARASP,ARK3,AT1G01970,AT1G19210,AT1G49850,AT1G56500,AT1G63100,AT1G68360,AT1G72180,AT1G72250,AT1G80870,AT2G01820,AT2G24130,AT2G28510,AT2G33620,AT2G34140,AT2G36570,AT2G37660,AT2G41710,AT2G41890,AT3G05640,AT3G07700,AT3G20015,AT3G51670,AT3G51950,AT3G53190,AT3G53380,AT3G59350,AT3G62260,AT4G03230,AT4G08850,AT4G27280,AT4G33070,AT5G03380,AT5G10690,AT5G24010,AT…
	GO:0003677	DNA binding	56	1983	0.00052	AT1G07090.1,AT1G09340.1,AT1G15340.1,AT1G19210.1,AT1G19850.1,AT1G23380.2,AT1G27730.1,AT1G33060.2,AT1G46480.1,AT1G50420.1,AT1G52150.2,AT1G63100.1,AT1G66350.1,AT1G68360.1,AT2G22540.1,AT2G27230.2,AT2G28510.1,AT2G31160.1,AT2G33620.2,AT2G34140.1,AT2G34710.1,AT2G35940.3,AT2G38470.1,AT2G41710.3,AT2G42610.1,AT2G46680.1,AT2G46820.1,AT2G47260.1,AT2G47520.1,AT2G47620.1,AT3G07740.4,AT3G15210.1,AT3G16770.1,AT3…	ADA2A,ANT,AT1G19210,AT1G63100,AT1G68360,AT2G28510,AT2G33620,AT2G34140,AT2G41710,AT3G20015,AT3G51950,AT5G51190,AT5G66770,ATHB-15,ATHB-7,BLH1,CRB,CRD1,EBP,ERF-1,ERF4,ERF71,HSF3,HSFA3,HSFA4A,IDD2,KNAT1,KNAT6,LHW,LRP1,LSH10,LSH3,LSH6,MBD10,MP,MYB15,MYB84,NAC014,PBRP,PC-MYB1,PHB,PRR7,PSI-P,PTL,REV,RGL1,SCL3,STZ,SVP,SWI3A,WOX13,WOX4,WRKY23,WRKY33,WRKY48,WRKY70
	GO:0003700	DNA-binding transcription factor activity	42	1333	0.00052	AT1G19210.1,AT1G19850.1,AT1G23380.2,AT1G27730.1,AT1G33060.2,AT1G50420.1,AT1G63100.1,AT1G66350.1,AT1G68360.1,AT2G22540.1,AT2G27230.2,AT2G28510.1,AT2G33310.2,AT2G34140.1,AT2G34710.1,AT2G35940.3,AT2G38470.1,AT2G41710.3,AT2G46680.1,AT2G47260.1,AT2G47520.1,AT3G07740.4,AT3G15210.1,AT3G16770.1,AT3G23250.1,AT3G49690.1,AT3G50700.1,AT3G56400.1,AT4G08150.1,AT4G17500.1,AT4G18880.1,AT4G29080.1,AT4G32730.2,AT4…	ADA2A,ANT,AT1G19210,AT1G63100,AT1G68360,AT2G28510,AT2G34140,AT2G41710,AT5G51190,AT5G66770,ATHB-7,BLH1,EBP,ERF-1,ERF4,ERF71,HSF3,HSFA3,HSFA4A,IAA13,IAA27,IDD2,KNAT1,KNAT6,LHW,MP,MYB15,MYB84,NAC014,PC-MYB1,PHB,PTL,REV,RGL1,SCL3,STZ,SVP,WOX13,WRKY23,WRKY33,WRKY48,WRKY70
	GO:0097159	organic cyclic compound binding	125	5841	0.00052	AT1G01970.1,AT1G05460.1,AT1G07090.1,AT1G09340.1,AT1G09570.1,AT1G12430.2,AT1G12900.1,AT1G14790.1,AT1G15340.1,AT1G17650.1,AT1G19210.1,AT1G19850.1,AT1G20020.1,AT1G23380.2,AT1G27680.1,AT1G27730.1,AT1G30610.1,AT1G31800.1,AT1G33060.2,AT1G46480.1,AT1G50420.1,AT1G52150.2,AT1G55610.2,AT1G63100.1,AT1G66350.1,AT1G68010.2,AT1G68360.1,AT1G70520.1,AT1G72180.1,AT1G72250.2,AT1G73500.1,AT1G75350.1,AT1G80870.1,AT2…	ABCB2,ABCG32,ADA2A,ADR1-L1,ANT,APG3,APL2,ARK3,AT1G01970,AT1G19210,AT1G63100,AT1G68360,AT1G72180,AT1G72250,AT1G80870,AT2G01820,AT2G24130,AT2G28510,AT2G33620,AT2G34140,AT2G36570,AT2G41710,AT2G41890,AT3G07700,AT3G20015,AT3G51950,AT3G53380,AT3G59350,AT4G03230,AT4G08850,AT4G33070,AT5G10690,AT5G24010,AT5G51190,AT5G65260,AT5G66770,ATHB-15,ATHB-7,At5g46330,BCS1,BLH1,BRL1,CCR4,CNGC1,CNGC5,CRB,CRD1,CRK2,CS…
	GO:0140110	transcription regulator activity	43	1399	0.00052	AT1G19210.1,AT1G19850.1,AT1G23380.2,AT1G27730.1,AT1G33060.2,AT1G50420.1,AT1G63100.1,AT1G66350.1,AT1G68360.1,AT2G22540.1,AT2G27230.2,AT2G28510.1,AT2G33310.2,AT2G34140.1,AT2G34710.1,AT2G35940.3,AT2G38470.1,AT2G41710.3,AT2G46680.1,AT2G47260.1,AT2G47520.1,AT3G07740.4,AT3G15210.1,AT3G16770.1,AT3G23250.1,AT3G49690.1,AT3G50700.1,AT3G56400.1,AT4G08150.1,AT4G17500.1,AT4G18880.1,AT4G29080.1,AT4G32730.2,AT4…	ADA2A,ANT,AT1G19210,AT1G63100,AT1G68360,AT2G28510,AT2G34140,AT2G41710,AT5G51190,AT5G66770,ATHB-7,BLH1,BT4,EBP,ERF-1,ERF4,ERF71,HSF3,HSFA3,HSFA4A,IAA13,IAA27,IDD2,KNAT1,KNAT6,LHW,MP,MYB15,MYB84,NAC014,PC-MYB1,PHB,PTL,REV,RGL1,SCL3,STZ,SVP,WOX13,WRKY23,WRKY33,WRKY48,WRKY70
	GO:1901363	heterocyclic compound binding	125	5835	0.00052	AT1G01970.1,AT1G05460.1,AT1G07090.1,AT1G09340.1,AT1G09570.1,AT1G12430.2,AT1G12900.1,AT1G14790.1,AT1G15340.1,AT1G17650.1,AT1G19210.1,AT1G19850.1,AT1G20020.1,AT1G23380.2,AT1G27680.1,AT1G27730.1,AT1G30610.1,AT1G31800.1,AT1G33060.2,AT1G46480.1,AT1G50420.1,AT1G52150.2,AT1G55610.2,AT1G63100.1,AT1G66350.1,AT1G68010.2,AT1G68360.1,AT1G70520.1,AT1G72180.1,AT1G72250.2,AT1G73500.1,AT1G75350.1,AT1G80870.1,AT2…	ABCB2,ABCG32,ADA2A,ADR1-L1,ANT,APG3,APL2,ARK3,AT1G01970,AT1G19210,AT1G63100,AT1G68360,AT1G72180,AT1G72250,AT1G80870,AT2G01820,AT2G24130,AT2G28510,AT2G33620,AT2G34140,AT2G36570,AT2G41710,AT2G41890,AT3G07700,AT3G20015,AT3G51950,AT3G53380,AT3G59350,AT4G03230,AT4G08850,AT4G33070,AT5G10690,AT5G24010,AT5G51190,AT5G65260,AT5G66770,ATHB-15,ATHB-7,At5g46330,BCS1,BLH1,BRL1,CCR4,CNGC1,CNGC5,CRB,CRD1,CRK2,CS…
	GO:0008266	poly(U) RNA binding	5	16	0.00068	AT1G20020.1,AT1G68010.2,AT3G50820.1,AT3G63140.1,AT4G37930.1	CSP41A,FNR2,HPR,PSBO2,SHM1
	GO:0016491	oxidoreductase activity	37	1201	0.0015	AT1G02400.1,AT1G11840.6,AT1G12900.1,AT1G17650.1,AT1G20020.1,AT1G30040.1,AT1G31800.1,AT1G55510.1,AT1G60420.1,AT1G68010.2,AT1G72520.1,AT1G75280.1,AT2G21280.1,AT2G27690.1,AT2G40370.1,AT2G41540.2,AT2G41680.1,AT3G15360.1,AT3G23580.1,AT3G26060.2,AT3G45140.1,AT3G48520.1,AT3G50820.1,AT3G51030.1,AT3G56940.1,AT4G03280.1,AT4G09010.1,AT4G29720.1,AT4G31500.1,AT5G06720.1,AT5G14760.1,AT5G16990.1,AT5G18170.1,AT5…	AO,AT1G60420,AT1G75280,AT5G16990,AT5G58330,At1g55510,BCB,CRD1,CYP83B1,CYP94B1,CYP94B3,CYP94C1,CYP97A3,FNR2,GA2OX2,GA2OX6,GAPA-2,GDH1,GLX1,GLYR2,GPDHC1,HPR,LAC5,LOX2,LOX4,NTRC,PA2,PAO5,PETC,PRXQ,PSBO2,RBOHD,RNR2A,SULA,TL29,TRX-M4,TRX1
	GO:0043565	sequence-specific DNA binding	26	730	0.0023	AT1G15340.1,AT1G23380.2,AT1G27730.1,AT1G50420.1,AT1G63100.1,AT1G66350.1,AT1G68360.1,AT2G22540.1,AT2G38470.1,AT2G46680.1,AT2G47260.1,AT3G15210.1,AT3G16770.1,AT3G23250.1,AT3G49690.1,AT3G56400.1,AT4G08150.1,AT4G18880.1,AT4G32730.2,AT4G36650.1,AT4G37750.1,AT5G03720.1,AT5G16820.2,AT5G49520.1,AT5G60690.1,AT5G66770.1	ANT,AT1G63100,AT1G68360,AT5G66770,ATHB-7,EBP,ERF4,HSF3,HSFA3,HSFA4A,KNAT1,KNAT6,MBD10,MYB15,MYB84,PBRP,PC-MYB1,REV,RGL1,SCL3,STZ,SVP,WRKY23,WRKY33,WRKY48,WRKY70
	GO:0003676	nucleic acid binding	72	3292	0.019	AT1G01970.1,AT1G07090.1,AT1G09340.1,AT1G09570.1,AT1G14790.1,AT1G15340.1,AT1G19210.1,AT1G19850.1,AT1G20020.1,AT1G23380.2,AT1G27730.1,AT1G30610.1,AT1G33060.2,AT1G46480.1,AT1G50420.1,AT1G52150.2,AT1G63100.1,AT1G66350.1,AT1G68010.2,AT1G68360.1,AT1G75350.1,AT2G22540.1,AT2G27230.2,AT2G28510.1,AT2G31160.1,AT2G33620.2,AT2G34140.1,AT2G34710.1,AT2G35940.3,AT2G38470.1,AT2G39140.1,AT2G41710.3,AT2G42610.1,AT2…	ADA2A,ANT,APG3,AT1G01970,AT1G19210,AT1G63100,AT1G68360,AT2G28510,AT2G33620,AT2G34140,AT2G41710,AT3G20015,AT3G51950,AT5G10690,AT5G51190,AT5G65260,AT5G66770,ATHB-15,ATHB-7,BLH1,CRB,CRD1,CSP41A,EBP,EMB2279,EMB976,ERF-1,ERF4,ERF71,FNR2,HPR,HSF3,HSFA3,HSFA4A,IDD2,KNAT1,KNAT6,LHW,LRP1,LSH10,LSH3,LSH6,MBD10,MP,MYB15,MYB84,NAC014,OTP84,PBRP,PC-MYB1,PHB,PHYA,PRR7,PSBO2,PSI-P,PTL,RDR1,REV,RGL1,SCL3,SHM1,ST…
	GO:0019199	transmembrane receptor protein kinase activity	9	147	0.019	AT1G72180.1,AT1G80870.1,AT2G01820.1,AT2G05940.1,AT2G17220.1,AT2G28930.1,AT3G59350.1,AT5G16000.1,AT5G46330.1	AT1G72180,AT1G80870,AT2G01820,AT3G59350,At5g46330,Kin3,NIK1,PK1B,RIPK
	GO:0004672	protein kinase activity	24	782	0.0287	AT1G09570.1,AT1G55610.2,AT1G70520.1,AT1G72180.1,AT1G73500.1,AT1G80870.1,AT2G01820.1,AT2G05940.1,AT2G17220.1,AT2G24130.1,AT2G28930.1,AT2G36570.1,AT2G41890.1,AT2G48010.1,AT3G53380.1,AT3G59350.1,AT4G03230.1,AT4G08850.1,AT5G16000.1,AT5G24010.1,AT5G46330.1,AT5G47850.1,AT5G61480.1,AT5G65700.2	AT1G72180,AT1G80870,AT2G01820,AT2G24130,AT2G36570,AT2G41890,AT3G53380,AT3G59350,AT4G03230,AT4G08850,AT5G24010,At5g46330,BRL1,CCR4,CRK2,Kin3,MKK9,MPA24.5,NIK1,PHYA,PK1B,PXY,RIPK,RKF3
	GO:0016740	transferase activity	63	2847	0.0287	AT1G02730.1,AT1G02860.1,AT1G09570.1,AT1G14790.1,AT1G18590.1,AT1G21410.1,AT1G23360.1,AT1G24330.1,AT1G27680.1,AT1G29340.1,AT1G33170.1,AT1G49850.1,AT1G55610.2,AT1G70520.1,AT1G72180.1,AT1G73500.1,AT1G73880.1,AT1G80870.1,AT2G01820.1,AT2G05940.1,AT2G16890.2,AT2G17220.1,AT2G24130.1,AT2G26250.1,AT2G28930.1,AT2G33770.1,AT2G36570.1,AT2G36870.1,AT2G41890.1,AT2G48010.1,AT3G03190.1,AT3G03310.1,AT3G07700.3,AT3…	APL2,APT5,AT1G24330,AT1G33170,AT1G49850,AT1G72180,AT1G80870,AT2G01820,AT2G16890,AT2G24130,AT2G36570,AT2G41890,AT3G07700,AT3G53380,AT3G59350,AT4G03230,AT4G08850,AT5G24010,AT5G40250,ATL2,At4g39640,At5g17990,At5g46330,BRL1,BT4,CCR4,CRK2,CSLA02,CSLD5,DHS1,DHS2,GALS3,GATL10,GAUT15,GSL12,GSTF11,HOS3-1,IAMT1,KCS10,Kin3,LCAT3,MENG,MGD1,MKK9,MPA24.5,NIK1,NLA,PHO2,PHYA,PK1B,PUB17,PXY,RDR1,RIPK,RKF3,SERAT1;…
	GO:0004675	transmembrane receptor protein serine/threonine kinase activity	8	132	0.0333	AT1G80870.1,AT2G01820.1,AT2G05940.1,AT2G17220.1,AT2G28930.1,AT3G59350.1,AT5G16000.1,AT5G46330.1	AT1G80870,AT2G01820,AT3G59350,At5g46330,Kin3,NIK1,PK1B,RIPK
	GO:0003849	3-deoxy-7-phosphoheptulonate synthase activity	2	2	0.0357	AT4G33510.1,AT4G39980.1	DHS1,DHS2
	GO:0004674	protein serine/threonine kinase activity	22	712	0.0357	AT1G55610.2,AT1G70520.1,AT1G72180.1,AT1G73500.1,AT1G80870.1,AT2G01820.1,AT2G05940.1,AT2G17220.1,AT2G24130.1,AT2G28930.1,AT2G41890.1,AT2G48010.1,AT3G53380.1,AT3G59350.1,AT4G03230.1,AT4G08850.1,AT5G16000.1,AT5G24010.1,AT5G46330.1,AT5G47850.1,AT5G61480.1,AT5G65700.2	AT1G72180,AT1G80870,AT2G01820,AT2G24130,AT2G41890,AT3G53380,AT3G59350,AT4G03230,AT4G08850,AT5G24010,At5g46330,BRL1,CCR4,CRK2,Kin3,MKK9,MPA24.5,NIK1,PK1B,PXY,RIPK,RKF3
	GO:0052694	jasmonoyl-isoleucine-12-hydroxylase activity	2	2	0.0357	AT3G48520.1,AT5G63450.1	CYP94B1,CYP94B3
	GO:0038023	signaling receptor activity	10	217	0.0438	AT1G09570.1,AT1G72180.1,AT1G80870.1,AT2G01820.1,AT2G05940.1,AT2G17220.1,AT2G28930.1,AT3G59350.1,AT5G16000.1,AT5G46330.1	AT1G72180,AT1G80870,AT2G01820,AT3G59350,At5g46330,Kin3,NIK1,PHYA,PK1B,RIPK
	GO:0004791	thioredoxin-disulfide reductase activity	4	34	0.049	AT1G60420.1,AT2G41680.1,AT3G15360.1,AT3G51030.1	AT1G60420,NTRC,TRX-M4,TRX1
	GO:0043167	ion binding	98	5070	0.0499	AT1G02400.1,AT1G02860.1,AT1G05460.1,AT1G11840.6,AT1G12430.2,AT1G16070.2,AT1G27680.1,AT1G27730.1,AT1G30040.1,AT1G31800.1,AT1G49850.1,AT1G55610.2,AT1G56500.1,AT1G68360.1,AT1G68760.1,AT1G70520.1,AT1G72180.1,AT1G72250.2,AT1G72520.1,AT1G73500.1,AT1G75690.1,AT1G79460.1,AT1G80870.1,AT2G01820.1,AT2G05940.1,AT2G17220.1,AT2G24130.1,AT2G26910.1,AT2G27690.1,AT2G28510.1,AT2G28930.1,AT2G29630.2,AT2G32480.1,AT2…	ABCB2,ABCG32,ADA2A,ADR1-L1,APL2,ARASP,ARK3,AT1G49850,AT1G56500,AT1G68360,AT1G72180,AT1G72250,AT1G80870,AT2G01820,AT2G24130,AT2G28510,AT2G34140,AT2G36570,AT2G37660,AT2G41890,AT3G05640,AT3G07700,AT3G51950,AT3G53190,AT3G53380,AT3G59350,AT3G62260,AT4G03230,AT4G08850,AT4G27280,AT4G33070,AT5G03380,AT5G24010,AT5G40250,ATL2,At5g46330,BCB,BCS1,BGLU44,BRL1,BT4,CCR4,CNGC1,CNGC5,CRD1,CRK2,CYP83B1,CYP94B1,CYP…
	CELLULAR COMPONENT, GO-terms significantly enriched
	#term ID	term description	observed gene count	background gene count	false discovery rate	matching proteins in your network (IDs)	matching proteins in your network (labels)
	GO:0009579	thylakoid	38	483	6.96e-14	AT1G08380.1,AT1G12250.1,AT1G20020.1,AT1G51110.1,AT1G52230.1,AT1G54780.1,AT1G56500.1,AT1G75690.1,AT2G29650.1,AT2G30570.1,AT2G31040.1,AT2G37660.1,AT2G39730.1,AT2G42220.1,AT2G46820.1,AT3G07700.3,AT3G08940.2,AT3G15360.1,AT3G26060.2,AT3G45140.1,AT3G50820.1,AT3G55800.1,AT3G56940.1,AT3G63140.1,AT4G01150.1,AT4G03280.1,AT4G05180.1,AT4G09010.1,AT4G12800.1,AT4G13670.1,AT4G33510.1,AT4G37930.1,AT4G38970.1,AT5…	AT1G12250,AT1G51110,AT1G56500,AT2G31040,AT2G37660,AT2G42220,AT3G07700,AT4G01150,AT5G52970,AT5G58330,CRD1,CSP41A,CaS,DHS2,FBA2,FNR2,HCF136,LHCB4.2,LOX2,LQY1,PETC,PHT4;1,PRXQ,PSAH2,PSAL,PSAN,PSAO,PSBO2,PSBQ-2,PSBW,PSI-P,PTAC5,RCA,SBPASE,SHM1,TL29,TLP18.3,TRX-M4
	GO:0009534	chloroplast thylakoid	34	423	7.54e-13	AT1G08380.1,AT1G12250.1,AT1G20020.1,AT1G51110.1,AT1G52230.1,AT1G54780.1,AT1G56500.1,AT1G75690.1,AT2G29650.1,AT2G30570.1,AT2G31040.1,AT2G39730.1,AT2G42220.1,AT2G46820.1,AT3G07700.3,AT3G08940.2,AT3G15360.1,AT3G26060.2,AT3G45140.1,AT3G50820.1,AT3G56940.1,AT3G63140.1,AT4G01150.1,AT4G03280.1,AT4G05180.1,AT4G09010.1,AT4G12800.1,AT4G13670.1,AT4G33510.1,AT4G37930.1,AT5G23060.1,AT5G23120.1,AT5G52970.1,AT5…	AT1G12250,AT1G51110,AT1G56500,AT2G31040,AT2G42220,AT3G07700,AT4G01150,AT5G52970,CRD1,CSP41A,CaS,DHS2,FNR2,HCF136,LHCB4.2,LOX2,LQY1,PETC,PHT4;1,PRXQ,PSAH2,PSAL,PSAN,PSAO,PSBO2,PSBQ-2,PSBW,PSI-P,PTAC5,RCA,SHM1,TL29,TLP18.3,TRX-M4
	GO:0044434	chloroplast part	57	1205	1.29e-12	AT1G08380.1,AT1G09340.1,AT1G11840.6,AT1G12250.1,AT1G12900.1,AT1G17650.1,AT1G20020.1,AT1G31800.1,AT1G32080.1,AT1G51110.1,AT1G52230.1,AT1G54780.1,AT1G56500.1,AT1G75350.1,AT1G75690.1,AT1G79460.1,AT2G21280.1,AT2G29630.2,AT2G29650.1,AT2G30570.1,AT2G31040.1,AT2G32480.1,AT2G37660.1,AT2G39730.1,AT2G39930.1,AT2G41680.1,AT2G42220.1,AT2G46820.1,AT3G07700.3,AT3G08940.2,AT3G15360.1,AT3G24430.1,AT3G26060.2,AT3…	APE2,ARASP,AT1G12250,AT1G51110,AT1G56500,AT2G31040,AT2G37660,AT2G42220,AT3G07700,AT4G01150,AT5G52970,AT5G58330,At5g17990,CRB,CRD1,CSP41A,CT-BMY,CYP97A3,CaS,DHS2,FBA2,FNR2,GA2,GAPA-2,GLX1,GLYR2,HCF101,HCF136,ISA1,LHCB4.2,LOX2,LQY1,LrgB,MGD1,NTRC,PBRP,PETC,PHT4;1,PRXQ,PSAH2,PSAL,PSAN,PSAO,PSBO2,PSBQ-2,PSBW,PSI-P,PTAC5,RCA,SBPASE,SHM1,SULA,THIC,TL29,TLP18.3,TRX-M4,emb2184
	GO:0044464	cell part	254	12106	1.29e-12	AT1G01470.1,AT1G01970.1,AT1G02730.1,AT1G02860.1,AT1G05460.1,AT1G07090.1,AT1G08380.1,AT1G09340.1,AT1G09570.1,AT1G11580.1,AT1G11840.6,AT1G12250.1,AT1G12430.2,AT1G12780.1,AT1G12900.1,AT1G13700.1,AT1G15000.1,AT1G15340.1,AT1G17650.1,AT1G18590.1,AT1G19210.1,AT1G19850.1,AT1G20020.1,AT1G21410.1,AT1G23360.1,AT1G23380.2,AT1G24330.1,AT1G27680.1,AT1G27730.1,AT1G29340.1,AT1G30610.1,AT1G31800.1,AT1G32080.1,AT1…	AAE13,AAP6,ABCG32,ADA2A,ADF5,ANT,AO,APE2,APG3,APL2,APT5,ARASP,ARK3,AT1G01970,AT1G12250,AT1G19210,AT1G24330,AT1G33170,AT1G51110,AT1G56500,AT1G60420,AT1G63100,AT1G67340,AT1G68360,AT1G72180,AT1G72250,AT1G75280,AT1G76070,AT1G80870,AT2G01820,AT2G16890,AT2G24130,AT2G28510,AT2G31040,AT2G33620,AT2G34140,AT2G36570,AT2G37660,AT2G41710,AT2G41890,AT2G42220,AT3G05640,AT3G07700,AT3G21690,AT3G51670,AT3G53380,AT…
	GO:0044436	thylakoid part	31	385	2.91e-12	AT1G08380.1,AT1G12250.1,AT1G20020.1,AT1G51110.1,AT1G52230.1,AT1G54780.1,AT1G56500.1,AT1G75690.1,AT2G29650.1,AT2G30570.1,AT2G31040.1,AT2G39730.1,AT2G42220.1,AT2G46820.1,AT3G07700.3,AT3G08940.2,AT3G15360.1,AT3G26060.2,AT3G45140.1,AT3G50820.1,AT3G56940.1,AT4G01150.1,AT4G03280.1,AT4G05180.1,AT4G09010.1,AT4G12800.1,AT4G13670.1,AT5G23060.1,AT5G23120.1,AT5G52970.1,AT5G64040.2	AT1G12250,AT1G51110,AT1G56500,AT2G31040,AT2G42220,AT3G07700,AT4G01150,AT5G52970,CRD1,CaS,FNR2,HCF136,LHCB4.2,LOX2,LQY1,PETC,PHT4;1,PRXQ,PSAH2,PSAL,PSAN,PSAO,PSBO2,PSBQ-2,PSBW,PSI-P,PTAC5,RCA,TL29,TLP18.3,TRX-M4
	GO:0009535	chloroplast thylakoid membrane	29	347	6.92e-12	AT1G08380.1,AT1G12250.1,AT1G20020.1,AT1G51110.1,AT1G52230.1,AT1G54780.1,AT1G56500.1,AT1G75690.1,AT2G29650.1,AT2G30570.1,AT2G31040.1,AT2G39730.1,AT2G42220.1,AT2G46820.1,AT3G07700.3,AT3G08940.2,AT3G15360.1,AT3G45140.1,AT3G50820.1,AT3G56940.1,AT4G01150.1,AT4G03280.1,AT4G05180.1,AT4G09010.1,AT4G12800.1,AT4G13670.1,AT5G23060.1,AT5G23120.1,AT5G64040.2	AT1G12250,AT1G51110,AT1G56500,AT2G31040,AT2G42220,AT3G07700,AT4G01150,CRD1,CaS,FNR2,HCF136,LHCB4.2,LOX2,LQY1,PETC,PHT4;1,PSAH2,PSAL,PSAN,PSAO,PSBO2,PSBQ-2,PSBW,PSI-P,PTAC5,RCA,TL29,TLP18.3,TRX-M4
	GO:0009507	chloroplast	73	2026	3.28e-11	AT1G08380.1,AT1G09340.1,AT1G11840.6,AT1G12250.1,AT1G12900.1,AT1G17650.1,AT1G20020.1,AT1G23360.1,AT1G24330.1,AT1G27680.1,AT1G30610.1,AT1G31800.1,AT1G32080.1,AT1G51110.1,AT1G52230.1,AT1G54780.1,AT1G56500.1,AT1G68010.2,AT1G72520.1,AT1G75350.1,AT1G75690.1,AT1G79460.1,AT2G17840.1,AT2G21280.1,AT2G29630.2,AT2G29650.1,AT2G30570.1,AT2G31040.1,AT2G32480.1,AT2G37660.1,AT2G39140.1,AT2G39730.1,AT2G39930.1,AT2…	AO,APE2,APG3,APL2,ARASP,AT1G12250,AT1G24330,AT1G51110,AT1G56500,AT2G31040,AT2G37660,AT2G42220,AT3G07700,AT4G01150,AT5G41620,AT5G52970,AT5G58330,At5g17990,CRB,CRD1,CSP41A,CT-BMY,CYP97A3,CaS,DHS1,DHS2,EMB2279,ERD7,FBA2,FNR2,GA2,GAPA-2,GLX1,GLYR2,HCF101,HCF136,HPR,INV-E,ISA1,J20,LHCB4.2,LOX2,LOX4,LQY1,LrgB,MENG,MGD1,NTRC,OTP84,PBRP,PETC,PHT4;1,PRXQ,PSAH2,PSAL,PSAN,PSAO,PSBO2,PSBQ-2,PSBW,PSI-P,PTAC5,…
	GO:0009532	plastid stroma	32	661	1.35e-07	AT1G09340.1,AT1G12900.1,AT1G17650.1,AT1G20020.1,AT1G52230.1,AT1G56500.1,AT1G75350.1,AT1G75690.1,AT1G79460.1,AT2G29630.2,AT2G37660.1,AT2G39730.1,AT2G41680.1,AT2G46820.1,AT3G07700.3,AT3G08940.2,AT3G15360.1,AT3G24430.1,AT3G45140.1,AT3G50820.1,AT3G55800.1,AT3G63140.1,AT4G01150.1,AT4G05180.1,AT4G12800.1,AT4G13670.1,AT4G17090.1,AT4G37930.1,AT4G38970.1,AT5G17990.1,AT5G23120.1,AT5G58330.1	AT1G56500,AT2G37660,AT3G07700,AT4G01150,AT5G58330,At5g17990,CRB,CSP41A,CT-BMY,FBA2,FNR2,GA2,GAPA-2,GLYR2,HCF101,HCF136,LHCB4.2,LOX2,LQY1,NTRC,PSAH2,PSAL,PSBO2,PSBQ-2,PSI-P,PTAC5,RCA,SBPASE,SHM1,THIC,TRX-M4,emb2184
	GO:0044424	intracellular part	209	10448	2.3e-07	AT1G01470.1,AT1G01970.1,AT1G02730.1,AT1G02860.1,AT1G05460.1,AT1G07090.1,AT1G08380.1,AT1G09340.1,AT1G09570.1,AT1G11580.1,AT1G11840.6,AT1G12250.1,AT1G12430.2,AT1G12780.1,AT1G12900.1,AT1G13700.1,AT1G15000.1,AT1G15340.1,AT1G17650.1,AT1G18590.1,AT1G19210.1,AT1G19850.1,AT1G20020.1,AT1G21410.1,AT1G23360.1,AT1G23380.2,AT1G24330.1,AT1G27680.1,AT1G27730.1,AT1G29340.1,AT1G30610.1,AT1G31800.1,AT1G32080.1,AT1…	AAE13,ADA2A,ADF5,ANT,AO,APE2,APG3,APL2,APT5,ARASP,ARK3,AT1G01970,AT1G12250,AT1G19210,AT1G24330,AT1G33170,AT1G51110,AT1G56500,AT1G60420,AT1G63100,AT1G67340,AT1G68360,AT1G72250,AT1G75280,AT2G16890,AT2G28510,AT2G31040,AT2G33620,AT2G34140,AT2G37660,AT2G41710,AT2G42220,AT3G07700,AT3G21690,AT3G51670,AT3G54630,AT3G57030,AT3G58530,AT4G01150,AT4G33070,AT5G03380,AT5G10690,AT5G16990,AT5G41620,AT5G51190,AT5G…
	GO:0016020	membrane	130	5592	2.43e-07	AT1G02730.1,AT1G02860.1,AT1G08380.1,AT1G09340.1,AT1G11580.1,AT1G11840.6,AT1G12250.1,AT1G12780.1,AT1G12900.1,AT1G19850.1,AT1G20020.1,AT1G32080.1,AT1G33060.2,AT1G33170.1,AT1G51110.1,AT1G52230.1,AT1G54780.1,AT1G55610.2,AT1G56500.1,AT1G69870.1,AT1G70520.1,AT1G72180.1,AT1G73590.1,AT1G74520.1,AT1G75280.1,AT1G75690.1,AT1G76070.1,AT1G80870.1,AT2G01820.1,AT2G03090.1,AT2G05940.1,AT2G17220.1,AT2G17840.1,AT2…	AAE13,AAP6,ABCB2,ABCG32,APE2,ARASP,AT1G12250,AT1G33170,AT1G51110,AT1G56500,AT1G72180,AT1G75280,AT1G76070,AT1G80870,AT2G01820,AT2G24130,AT2G31040,AT2G36570,AT2G41890,AT2G42220,AT3G05640,AT3G07700,AT3G21690,AT3G51670,AT3G53190,AT3G53380,AT3G53960,AT3G57030,AT3G59350,AT4G01150,AT4G03230,AT4G08850,AT4G33070,AT5G03380,AT5G14920,AT5G16990,AT5G24010,AT5G40250,AT5G41620,AT5G48800,AT5G56590,ATL2,At5g46330…
	GO:0009570	chloroplast stroma	31	649	2.58e-07	AT1G09340.1,AT1G12900.1,AT1G17650.1,AT1G20020.1,AT1G52230.1,AT1G56500.1,AT1G75350.1,AT1G75690.1,AT1G79460.1,AT2G29630.2,AT2G37660.1,AT2G39730.1,AT2G41680.1,AT3G07700.3,AT3G08940.2,AT3G15360.1,AT3G24430.1,AT3G45140.1,AT3G50820.1,AT3G55800.1,AT3G63140.1,AT4G01150.1,AT4G05180.1,AT4G12800.1,AT4G13670.1,AT4G17090.1,AT4G37930.1,AT4G38970.1,AT5G17990.1,AT5G23120.1,AT5G58330.1	AT1G56500,AT2G37660,AT3G07700,AT4G01150,AT5G58330,At5g17990,CRB,CSP41A,CT-BMY,FBA2,FNR2,GA2,GAPA-2,GLYR2,HCF101,HCF136,LHCB4.2,LOX2,LQY1,NTRC,PSAH2,PSAL,PSBO2,PSBQ-2,PTAC5,RCA,SBPASE,SHM1,THIC,TRX-M4,emb2184
	GO:0009526	plastid envelope	29	598	5.17e-07	AT1G09340.1,AT1G11840.6,AT1G12900.1,AT1G31800.1,AT1G32080.1,AT1G51110.1,AT1G75350.1,AT2G21280.1,AT2G32480.1,AT2G39730.1,AT2G46820.1,AT3G08940.2,AT3G15360.1,AT3G45140.1,AT3G55800.1,AT3G56940.1,AT3G63140.1,AT4G01150.1,AT4G03280.1,AT4G12800.1,AT4G13670.1,AT4G31780.2,AT4G36650.1,AT4G37930.1,AT4G38970.1,AT5G17990.1,AT5G23120.1,AT5G46110.4,AT5G58330.1	APE2,ARASP,AT1G51110,AT4G01150,AT5G58330,At5g17990,CRB,CRD1,CSP41A,CYP97A3,FBA2,GAPA-2,GLX1,HCF136,LHCB4.2,LOX2,LrgB,MGD1,PBRP,PETC,PSAL,PSI-P,PTAC5,RCA,SBPASE,SHM1,SULA,TRX-M4,emb2184
	GO:0009941	chloroplast envelope	28	584	1e-06	AT1G09340.1,AT1G11840.6,AT1G12900.1,AT1G31800.1,AT1G32080.1,AT1G51110.1,AT1G75350.1,AT2G21280.1,AT2G32480.1,AT2G39730.1,AT2G46820.1,AT3G08940.2,AT3G15360.1,AT3G45140.1,AT3G55800.1,AT3G56940.1,AT3G63140.1,AT4G01150.1,AT4G03280.1,AT4G12800.1,AT4G13670.1,AT4G31780.2,AT4G36650.1,AT4G38970.1,AT5G17990.1,AT5G23120.1,AT5G46110.4,AT5G58330.1	APE2,ARASP,AT1G51110,AT4G01150,AT5G58330,At5g17990,CRB,CRD1,CSP41A,CYP97A3,FBA2,GAPA-2,GLX1,HCF136,LHCB4.2,LOX2,LrgB,MGD1,PBRP,PETC,PSAL,PSI-P,PTAC5,RCA,SBPASE,SULA,TRX-M4,emb2184
	GO:0031984	organelle subcompartment	45	1306	1.8e-06	AT1G02730.1,AT1G08380.1,AT1G12250.1,AT1G20020.1,AT1G33170.1,AT1G51110.1,AT1G52230.1,AT1G54780.1,AT1G56500.1,AT1G75690.1,AT2G26250.1,AT2G27690.1,AT2G29650.1,AT2G30570.1,AT2G31040.1,AT2G33770.1,AT2G39730.1,AT2G42220.1,AT2G46820.1,AT3G07700.3,AT3G08940.2,AT3G15360.1,AT3G26060.2,AT3G28340.1,AT3G45140.1,AT3G48520.1,AT3G50820.1,AT3G56940.1,AT3G58790.1,AT3G63140.1,AT4G01150.1,AT4G03280.1,AT4G05180.1,AT4…	AT1G12250,AT1G33170,AT1G51110,AT1G56500,AT2G31040,AT2G42220,AT3G07700,AT4G01150,AT5G52970,CRD1,CSLA02,CSLD5,CSP41A,CYP94B3,CYP94C1,CaS,DHS2,FNR2,GALS3,GATL10,GAUT15,HCF136,HOS3-1,KCS10,LHCB4.2,LOX2,LQY1,PETC,PHO2,PHT4;1,PRXQ,PSAH2,PSAL,PSAN,PSAO,PSBO2,PSBQ-2,PSBW,PSI-P,PTAC5,RCA,SHM1,TL29,TLP18.3,TRX-M4
	GO:0010287	plastoglobule	10	76	4.15e-06	AT1G09340.1,AT1G52230.1,AT2G39730.1,AT3G07700.3,AT3G08940.2,AT3G50820.1,AT3G63140.1,AT4G01150.1,AT4G12800.1,AT4G38970.1	AT3G07700,AT4G01150,CRB,CSP41A,FBA2,LHCB4.2,PSAH2,PSAL,PSBO2,RCA
	GO:0043231	intracellular membrane-bounded organelle	179	8914	4.16e-06	AT1G01970.1,AT1G02730.1,AT1G02860.1,AT1G07090.1,AT1G08380.1,AT1G09340.1,AT1G09570.1,AT1G11580.1,AT1G11840.6,AT1G12250.1,AT1G12900.1,AT1G15000.1,AT1G15340.1,AT1G17650.1,AT1G19210.1,AT1G19850.1,AT1G20020.1,AT1G21410.1,AT1G23360.1,AT1G23380.2,AT1G24330.1,AT1G27680.1,AT1G27730.1,AT1G29340.1,AT1G30610.1,AT1G31800.1,AT1G32080.1,AT1G33060.2,AT1G33170.1,AT1G46480.1,AT1G50420.1,AT1G51110.1,AT1G52150.2,AT1…	AAE13,ADA2A,ANT,AO,APE2,APG3,APL2,ARASP,AT1G01970,AT1G12250,AT1G19210,AT1G24330,AT1G33170,AT1G51110,AT1G56500,AT1G63100,AT1G67340,AT1G68360,AT2G16890,AT2G28510,AT2G31040,AT2G33620,AT2G34140,AT2G37660,AT2G41710,AT2G42220,AT3G07700,AT3G21690,AT3G54630,AT3G57030,AT4G01150,AT5G10690,AT5G41620,AT5G51190,AT5G52970,AT5G58330,AT5G65260,AT5G66770,ATHB-15,ATHB-7,At1g55510,At5g17990,BCB,BCS1,BLH1,BT4,COR413…
	GO:0043227	membrane-bounded organelle	180	9036	6.37e-06	AT1G01970.1,AT1G02730.1,AT1G02860.1,AT1G07090.1,AT1G08380.1,AT1G09340.1,AT1G09570.1,AT1G11580.1,AT1G11840.6,AT1G12250.1,AT1G12900.1,AT1G15000.1,AT1G15340.1,AT1G17650.1,AT1G19210.1,AT1G19850.1,AT1G20020.1,AT1G21410.1,AT1G23360.1,AT1G23380.2,AT1G24330.1,AT1G27680.1,AT1G27730.1,AT1G29340.1,AT1G30610.1,AT1G31800.1,AT1G32080.1,AT1G33060.2,AT1G33170.1,AT1G46480.1,AT1G50420.1,AT1G51110.1,AT1G52150.2,AT1…	AAE13,ADA2A,ANT,AO,APE2,APG3,APL2,ARASP,AT1G01970,AT1G12250,AT1G19210,AT1G24330,AT1G33170,AT1G51110,AT1G56500,AT1G63100,AT1G67340,AT1G68360,AT2G16890,AT2G28510,AT2G31040,AT2G33620,AT2G34140,AT2G37660,AT2G41710,AT2G42220,AT3G07700,AT3G21690,AT3G54630,AT3G57030,AT4G01150,AT5G10690,AT5G41620,AT5G51190,AT5G52970,AT5G58330,AT5G65260,AT5G66770,ATHB-15,ATHB-7,At1g55510,At5g17990,At5g46330,BCB,BCS1,BLH1,…
	GO:0071944	cell periphery	76	2954	9.87e-06	AT1G02860.1,AT1G11580.1,AT1G11840.6,AT1G12780.1,AT1G55610.2,AT1G69870.1,AT1G70520.1,AT1G72180.1,AT1G73590.1,AT1G75280.1,AT1G76070.1,AT1G80870.1,AT2G01820.1,AT2G03090.1,AT2G05940.1,AT2G17220.1,AT2G17840.1,AT2G18500.1,AT2G24130.1,AT2G26910.1,AT2G28930.1,AT2G36570.1,AT2G36870.1,AT2G39730.1,AT2G41890.1,AT2G48010.1,AT3G05640.1,AT3G15360.1,AT3G16770.1,AT3G18080.1,AT3G45970.1,AT3G50830.1,AT3G51670.1,AT3…	AAP6,ABCG32,AT1G72180,AT1G75280,AT1G76070,AT1G80870,AT2G01820,AT2G24130,AT2G36570,AT2G41890,AT3G05640,AT3G51670,AT3G53380,AT3G53960,AT3G57030,AT3G59350,AT4G03230,AT4G08850,AT5G03380,AT5G14450,AT5G14920,AT5G16990,AT5G24010,AT5G26670,AT5G41620,AT5G47550,AT5G48800,AT5G56590,At4g39640,At5g46330,BCB,BGLU44,BRL1,CNGC1,CNGC5,COR413-PM2,CRK2,CYP83B1,ChiC,DL1E,EBP,ERD7,EXLA1,EXO,EXPA15,EXPB3,GLX1,GSL12,Ki…
	GO:0043229	intracellular organelle	184	9362	1.02e-05	AT1G01970.1,AT1G02730.1,AT1G02860.1,AT1G07090.1,AT1G08380.1,AT1G09340.1,AT1G09570.1,AT1G11580.1,AT1G11840.6,AT1G12250.1,AT1G12430.2,AT1G12900.1,AT1G15000.1,AT1G15340.1,AT1G17650.1,AT1G19210.1,AT1G19850.1,AT1G20020.1,AT1G21410.1,AT1G23360.1,AT1G23380.2,AT1G24330.1,AT1G27680.1,AT1G27730.1,AT1G29340.1,AT1G30610.1,AT1G31800.1,AT1G32080.1,AT1G33060.2,AT1G33170.1,AT1G46480.1,AT1G50420.1,AT1G51110.1,AT1…	AAE13,ADA2A,ADF5,ANT,AO,APE2,APG3,APL2,ARASP,ARK3,AT1G01970,AT1G12250,AT1G19210,AT1G24330,AT1G33170,AT1G51110,AT1G56500,AT1G63100,AT1G67340,AT1G68360,AT1G72250,AT2G16890,AT2G28510,AT2G31040,AT2G33620,AT2G34140,AT2G37660,AT2G41710,AT2G42220,AT3G07700,AT3G21690,AT3G54630,AT3G57030,AT4G01150,AT5G10690,AT5G41620,AT5G51190,AT5G52970,AT5G58330,AT5G65260,AT5G66770,ATHB-15,ATHB-7,At1g55510,At5g17990,At5g…
	GO:0009521	photosystem	10	87	1.04e-05	AT1G08380.1,AT1G52230.1,AT2G30570.1,AT2G46820.1,AT3G08940.2,AT3G50820.1,AT4G05180.1,AT4G12800.1,AT5G23120.1,AT5G64040.2	HCF136,LHCB4.2,PSAH2,PSAL,PSAN,PSAO,PSBO2,PSBQ-2,PSBW,PSI-P
	GO:0044444	cytoplasmic part	133	6244	1.38e-05	AT1G01470.1,AT1G02730.1,AT1G08380.1,AT1G09340.1,AT1G11580.1,AT1G11840.6,AT1G12250.1,AT1G12780.1,AT1G12900.1,AT1G13700.1,AT1G15000.1,AT1G15340.1,AT1G17650.1,AT1G20020.1,AT1G23360.1,AT1G24330.1,AT1G27680.1,AT1G30610.1,AT1G31800.1,AT1G32080.1,AT1G33170.1,AT1G51110.1,AT1G52230.1,AT1G54780.1,AT1G55510.1,AT1G56500.1,AT1G60420.1,AT1G68010.2,AT1G68760.1,AT1G72520.1,AT1G73590.1,AT1G75350.1,AT1G75690.1,AT1…	AAE13,AO,APE2,APG3,APL2,APT5,ARASP,AT1G12250,AT1G24330,AT1G33170,AT1G51110,AT1G56500,AT1G60420,AT2G31040,AT2G33620,AT2G37660,AT2G42220,AT3G07700,AT3G21690,AT3G57030,AT3G58530,AT4G01150,AT4G33070,AT5G10690,AT5G16990,AT5G41620,AT5G52970,AT5G58330,At1g55510,At5g17990,At5g46330,BAG4,BCB,BCS1,BGLU44,BT4,CINV2,COR413-PM2,CRB,CRD1,CSLA02,CSLD5,CSP41A,CT-BMY,CYP83B1,CYP94B3,CYP94C1,CYP97A3,CYSB,CaS,DHS1,…
	GO:0005737	cytoplasm	151	7481	4.13e-05	AT1G01470.1,AT1G02730.1,AT1G05460.1,AT1G08380.1,AT1G09340.1,AT1G09570.1,AT1G11580.1,AT1G11840.6,AT1G12250.1,AT1G12430.2,AT1G12780.1,AT1G12900.1,AT1G13700.1,AT1G15000.1,AT1G15340.1,AT1G17650.1,AT1G18590.1,AT1G20020.1,AT1G23360.1,AT1G24330.1,AT1G27680.1,AT1G29340.1,AT1G30610.1,AT1G31800.1,AT1G32080.1,AT1G33170.1,AT1G51110.1,AT1G52230.1,AT1G54780.1,AT1G55510.1,AT1G56500.1,AT1G60420.1,AT1G68010.2,AT1…	AAE13,ADF5,AO,APE2,APG3,APL2,APT5,ARASP,ARK3,AT1G12250,AT1G24330,AT1G33170,AT1G51110,AT1G56500,AT1G60420,AT1G75280,AT2G31040,AT2G33620,AT2G37660,AT2G42220,AT3G07700,AT3G21690,AT3G51670,AT3G57030,AT3G58530,AT4G01150,AT4G33070,AT5G03380,AT5G10690,AT5G16990,AT5G41620,AT5G52970,AT5G58330,AT5G65260,At1g55510,At5g17990,At5g46330,BAG4,BCB,BCS1,BGLU44,BLH1,BT4,CINV2,COR413-PM2,CRB,CRD1,CSLA02,CSLD5,CSP41…
	GO:0048046	apoplast	21	463	5.89e-05	AT1G09340.1,AT1G12900.1,AT1G20020.1,AT1G62770.1,AT1G68010.2,AT2G17230.1,AT2G36870.1,AT2G37660.1,AT2G39730.1,AT2G40370.1,AT3G51030.1,AT3G55800.1,AT3G63140.1,AT4G03210.1,AT4G05180.1,AT4G08950.1,AT4G33300.2,AT4G37930.1,AT4G38970.1,AT4G39640.1,AT5G58330.1	ADR1-L1,AT1G62770,AT2G37660,AT5G58330,At4g39640,CRB,CSP41A,EXL5,EXO,FBA2,FNR2,GAPA-2,HPR,LAC5,PSBQ-2,RCA,SBPASE,SHM1,TRX1,XTH32,XTH9
	GO:0031977	thylakoid lumen	8	70	0.0001	AT1G12250.1,AT1G54780.1,AT3G26060.2,AT3G50820.1,AT4G05180.1,AT4G09010.1,AT5G23120.1,AT5G52970.1	AT1G12250,AT5G52970,HCF136,PRXQ,PSBO2,PSBQ-2,TL29,TLP18.3
	GO:0009522	photosystem I	6	39	0.00026	AT1G08380.1,AT1G52230.1,AT2G46820.1,AT3G08940.2,AT4G12800.1,AT5G64040.2	LHCB4.2,PSAH2,PSAL,PSAN,PSAO,PSI-P
	GO:0005886	plasma membrane	60	2406	0.00028	AT1G02860.1,AT1G11840.6,AT1G12780.1,AT1G55610.2,AT1G69870.1,AT1G70520.1,AT1G72180.1,AT1G73590.1,AT1G75280.1,AT1G76070.1,AT1G80870.1,AT2G01820.1,AT2G05940.1,AT2G17220.1,AT2G17840.1,AT2G18500.1,AT2G24130.1,AT2G26910.1,AT2G28930.1,AT2G36570.1,AT2G41890.1,AT2G48010.1,AT3G05640.1,AT3G16770.1,AT3G50830.1,AT3G51670.1,AT3G53380.1,AT3G53960.1,AT3G54950.1,AT3G57030.1,AT3G59350.1,AT3G60190.1,AT4G03230.1,AT4…	AAP6,ABCG32,AT1G72180,AT1G75280,AT1G76070,AT1G80870,AT2G01820,AT2G24130,AT2G36570,AT2G41890,AT3G05640,AT3G51670,AT3G53380,AT3G53960,AT3G57030,AT3G59350,AT4G03230,AT4G08850,AT5G03380,AT5G14920,AT5G16990,AT5G24010,AT5G41620,AT5G48800,AT5G56590,At5g46330,BCB,BRL1,CNGC1,CNGC5,COR413-PM2,CRK2,CYP83B1,DL1E,EBP,ERD7,GLX1,GSL12,Kin3,MPA24.5,NIK1,NIP1;2,NLA,NRT1.7,OFP7,PETC,PIN1,PK1B,PLP7,PXY,RAC3,RBOHD,R…
	GO:0005576	extracellular region	42	1502	0.00039	AT1G09340.1,AT1G11580.1,AT1G12900.1,AT1G15000.1,AT1G20020.1,AT1G22690.1,AT1G62770.1,AT1G68010.2,AT2G03090.1,AT2G17230.1,AT2G36870.1,AT2G37660.1,AT2G39730.1,AT2G40370.1,AT3G12490.2,AT3G18080.1,AT3G20500.1,AT3G45970.1,AT3G51030.1,AT3G55800.1,AT3G63140.1,AT4G02290.1,AT4G03210.1,AT4G05180.1,AT4G08950.1,AT4G19810.1,AT4G20430.1,AT4G28250.1,AT4G33220.1,AT4G33300.2,AT4G37930.1,AT4G38970.1,AT4G39640.1,AT5…	ADR1-L1,AT1G22690,AT1G62770,AT2G37660,AT4G20430,AT5G14450,AT5G14920,AT5G26670,AT5G47550,AT5G56590,AT5G58330,At4g39640,BGLU44,CRB,CSP41A,CYSB,ChiC,EXL5,EXLA1,EXO,EXPA15,EXPB3,FBA2,FNR2,GAPA-2,GH9B13,HPR,LAC5,PA2,PAP18,PAP29,PME44,PMEPCRA,PSBQ-2,RCA,SBPASE,SHM1,TRX1,XTH32,XTH9,scpl35,scpl50
	GO:0031967	organelle envelope	30	1001	0.0014	AT1G09340.1,AT1G11840.6,AT1G12900.1,AT1G31800.1,AT1G32080.1,AT1G51110.1,AT1G75350.1,AT2G21280.1,AT2G32480.1,AT2G39730.1,AT2G46820.1,AT3G08940.2,AT3G15360.1,AT3G45140.1,AT3G50930.1,AT3G55800.1,AT3G56940.1,AT3G63140.1,AT4G01150.1,AT4G03280.1,AT4G12800.1,AT4G13670.1,AT4G31780.2,AT4G36650.1,AT4G37930.1,AT4G38970.1,AT5G17990.1,AT5G23120.1,AT5G46110.4,AT5G58330.1	APE2,ARASP,AT1G51110,AT4G01150,AT5G58330,At5g17990,BCS1,CRB,CRD1,CSP41A,CYP97A3,FBA2,GAPA-2,GLX1,HCF136,LHCB4.2,LOX2,LrgB,MGD1,PBRP,PETC,PSAL,PSI-P,PTAC5,RCA,SBPASE,SHM1,SULA,TRX-M4,emb2184
	GO:0044425	membrane part	83	3934	0.0023	AT1G02730.1,AT1G08380.1,AT1G20020.1,AT1G32080.1,AT1G33060.2,AT1G33170.1,AT1G52230.1,AT1G54780.1,AT1G55610.2,AT1G56500.1,AT1G69870.1,AT1G70520.1,AT1G72180.1,AT1G73590.1,AT1G74520.1,AT1G75690.1,AT1G80870.1,AT2G01820.1,AT2G24130.1,AT2G26250.1,AT2G26910.1,AT2G27690.1,AT2G29650.1,AT2G30570.1,AT2G31040.1,AT2G32480.1,AT2G33770.1,AT2G36570.1,AT2G41890.1,AT2G42220.1,AT2G46820.1,AT2G48010.1,AT3G07700.3,AT3…	AAP6,ABCB2,ABCG32,APE2,ARASP,AT1G33170,AT1G56500,AT1G72180,AT1G80870,AT2G01820,AT2G24130,AT2G31040,AT2G36570,AT2G41890,AT2G42220,AT3G07700,AT3G21690,AT3G53190,AT3G53380,AT3G53960,AT4G01150,AT4G03230,AT4G08850,AT5G24010,AT5G40250,AT5G56590,ATL2,At5g46330,BCB,BCS1,BRL1,CCR4,CNGC1,CNGC5,COR413-PM2,CRK2,CSLA02,CSLD5,CYP83B1,CYP94B1,CYP94B3,CYP94C1,CaS,EXLA1,FNR2,GALS3,GATL10,GAUT15,GSL12,HCF136,HOS3-…
	GO:0031224	intrinsic component of membrane	77	3602	0.0026	AT1G02730.1,AT1G08380.1,AT1G32080.1,AT1G33060.2,AT1G33170.1,AT1G52230.1,AT1G54780.1,AT1G55610.2,AT1G56500.1,AT1G69870.1,AT1G70520.1,AT1G72180.1,AT1G73590.1,AT1G74520.1,AT1G75690.1,AT1G80870.1,AT2G01820.1,AT2G24130.1,AT2G26250.1,AT2G26910.1,AT2G27690.1,AT2G29650.1,AT2G30570.1,AT2G31040.1,AT2G32480.1,AT2G36570.1,AT2G41890.1,AT2G42220.1,AT2G46820.1,AT2G48010.1,AT3G07700.3,AT3G08940.2,AT3G16720.1,AT3…	AAP6,ABCB2,ABCG32,APE2,ARASP,AT1G33170,AT1G56500,AT1G72180,AT1G80870,AT2G01820,AT2G24130,AT2G31040,AT2G36570,AT2G41890,AT2G42220,AT3G07700,AT3G21690,AT3G53190,AT3G53380,AT3G53960,AT4G01150,AT4G03230,AT4G08850,AT5G24010,AT5G40250,AT5G56590,ATL2,At5g46330,BCB,BCS1,BRL1,CCR4,CNGC1,CNGC5,COR413-PM2,CRK2,CSLA02,CSLD5,CYP83B1,CYP94B1,CYP94B3,CYP94C1,CaS,EXLA1,GALS3,GATL10,GAUT15,GSL12,HOS3-1,HVA22A,KCS…
	GO:0016021	integral component of membrane	74	3460	0.0032	AT1G02730.1,AT1G08380.1,AT1G32080.1,AT1G33060.2,AT1G33170.1,AT1G52230.1,AT1G54780.1,AT1G55610.2,AT1G56500.1,AT1G69870.1,AT1G70520.1,AT1G72180.1,AT1G73590.1,AT1G74520.1,AT1G75690.1,AT1G80870.1,AT2G01820.1,AT2G24130.1,AT2G26250.1,AT2G26910.1,AT2G27690.1,AT2G29650.1,AT2G30570.1,AT2G31040.1,AT2G32480.1,AT2G36570.1,AT2G41890.1,AT2G42220.1,AT2G46820.1,AT2G48010.1,AT3G07700.3,AT3G08940.2,AT3G16720.1,AT3…	AAP6,ABCB2,ABCG32,APE2,ARASP,AT1G33170,AT1G56500,AT1G72180,AT1G80870,AT2G01820,AT2G24130,AT2G31040,AT2G36570,AT2G41890,AT2G42220,AT3G07700,AT3G21690,AT3G53380,AT3G53960,AT4G01150,AT4G03230,AT4G08850,AT5G24010,AT5G40250,ATL2,At5g46330,BCS1,BRL1,CCR4,CNGC1,CNGC5,COR413-PM2,CRK2,CSLA02,CSLD5,CYP83B1,CYP94B1,CYP94B3,CYP94C1,CaS,EXLA1,GALS3,GATL10,GAUT15,GSL12,HOS3-1,HVA22A,KCS10,LHCB4.2,LQY1,LrgB,MPA…
	GO:0044422	organelle part	90	4398	0.0032	AT1G02730.1,AT1G02860.1,AT1G08380.1,AT1G09340.1,AT1G09570.1,AT1G11580.1,AT1G11840.6,AT1G12250.1,AT1G12430.2,AT1G12900.1,AT1G17650.1,AT1G20020.1,AT1G31800.1,AT1G32080.1,AT1G33170.1,AT1G51110.1,AT1G52230.1,AT1G54780.1,AT1G55510.1,AT1G56500.1,AT1G72250.2,AT1G75350.1,AT1G75690.1,AT1G79460.1,AT2G21280.1,AT2G26250.1,AT2G27690.1,AT2G28510.1,AT2G29630.2,AT2G29650.1,AT2G30570.1,AT2G31040.1,AT2G32480.1,AT2…	APE2,ARASP,ARK3,AT1G12250,AT1G33170,AT1G51110,AT1G56500,AT1G72250,AT2G28510,AT2G31040,AT2G37660,AT2G42220,AT3G07700,AT3G21690,AT3G54630,AT4G01150,AT5G52970,AT5G58330,AT5G65260,At1g55510,At5g17990,At5g46330,BCS1,BT4,COR413-PM2,CRB,CRD1,CSLA02,CSLD5,CSP41A,CT-BMY,CYP94B3,CYP94C1,CYP97A3,CaS,DHS2,DL1E,ERF4,FBA2,FNR2,GA2,GALS3,GAPA-2,GATL10,GAUT15,GLX1,GLYR2,HCF101,HCF136,HOS3-1,ISA1,KCS10,LCAT3,LHCB…
	GO:0044446	intracellular organelle part	89	4389	0.0044	AT1G02730.1,AT1G02860.1,AT1G08380.1,AT1G09340.1,AT1G09570.1,AT1G11580.1,AT1G11840.6,AT1G12250.1,AT1G12430.2,AT1G12900.1,AT1G17650.1,AT1G20020.1,AT1G31800.1,AT1G32080.1,AT1G33170.1,AT1G51110.1,AT1G52230.1,AT1G54780.1,AT1G55510.1,AT1G56500.1,AT1G72250.2,AT1G75350.1,AT1G75690.1,AT1G79460.1,AT2G21280.1,AT2G26250.1,AT2G27690.1,AT2G28510.1,AT2G29630.2,AT2G29650.1,AT2G30570.1,AT2G31040.1,AT2G32480.1,AT2…	APE2,ARASP,ARK3,AT1G12250,AT1G33170,AT1G51110,AT1G56500,AT1G72250,AT2G28510,AT2G31040,AT2G37660,AT2G42220,AT3G07700,AT3G21690,AT3G54630,AT4G01150,AT5G52970,AT5G58330,AT5G65260,At1g55510,At5g17990,At5g46330,BCS1,BT4,COR413-PM2,CRB,CRD1,CSLA02,CSLD5,CSP41A,CT-BMY,CYP94B3,CYP94C1,CYP97A3,CaS,DHS2,DL1E,ERF4,FBA2,FNR2,GA2,GALS3,GAPA-2,GATL10,GAUT15,GLX1,GLYR2,HCF101,HCF136,HOS3-1,ISA1,KCS10,LHCB4.2,LO…
	GO:0010319	stromule	4	35	0.0107	AT1G09340.1,AT2G39730.1,AT3G63140.1,AT4G37930.1	CRB,CSP41A,RCA,SHM1
	GO:0005618	cell wall	20	668	0.012	AT1G11580.1,AT1G73590.1,AT2G01820.1,AT2G03090.1,AT2G36870.1,AT2G39730.1,AT3G15360.1,AT3G18080.1,AT3G45970.1,AT3G57030.1,AT4G03210.1,AT4G08950.1,AT4G19810.1,AT4G28250.1,AT4G33220.1,AT4G39640.1,AT5G14450.1,AT5G26670.1,AT5G47550.1,AT5G56590.1	AT2G01820,AT3G57030,AT5G14450,AT5G26670,AT5G47550,AT5G56590,At4g39640,BGLU44,ChiC,EXLA1,EXO,EXPA15,EXPB3,PIN1,PME44,PMEPCRA,RCA,TRX-M4,XTH32,XTH9
	GO:0009523	photosystem II	5	62	0.0121	AT2G30570.1,AT3G08940.2,AT3G50820.1,AT4G05180.1,AT5G23120.1	HCF136,LHCB4.2,PSBO2,PSBQ-2,PSBW
	GO:0009505	plant-type cell wall	10	234	0.0128	AT1G73590.1,AT2G01820.1,AT3G18080.1,AT3G45970.1,AT3G57030.1,AT4G08950.1,AT4G39640.1,AT5G14450.1,AT5G26670.1,AT5G56590.1	AT2G01820,AT3G57030,AT5G14450,AT5G26670,AT5G56590,At4g39640,BGLU44,EXLA1,EXO,PIN1
	GO:0009706	chloroplast inner membrane	5	68	0.0168	AT1G32080.1,AT2G21280.1,AT2G32480.1,AT3G56940.1,AT4G31780.2	ARASP,CRD1,LrgB,MGD1,SULA
	GO:0009543	chloroplast thylakoid lumen	4	46	0.0228	AT1G12250.1,AT3G26060.2,AT4G09010.1,AT5G52970.1	AT1G12250,AT5G52970,PRXQ,TL29
	GO:0009538	photosystem I reaction center	2	8	0.0324	AT1G52230.1,AT4G12800.1	PSAH2,PSAL
	Significantly enriched KEGG PATHWAYS
	#term ID	term description	observed gene count	background gene count	false discovery rate	matching proteins in your network (IDs)	matching proteins in your network (labels)
	ath00195	Photosynthesis	9	76	0.00028	AT1G08380.1,AT1G20020.1,AT1G52230.1,AT2G30570.1,AT3G50820.1,AT4G03280.1,AT4G05180.1,AT4G12800.1,AT5G64040.2	FNR2,PETC,PSAH2,PSAL,PSAN,PSAO,PSBO2,PSBQ-2,PSBW
	ath01100	Metabolic pathways	53	1899	0.00028	AT1G02730.1,AT1G11580.1,AT1G12780.1,AT1G12900.1,AT1G13700.1,AT1G15820.1,AT1G17650.1,AT1G20020.1,AT1G23360.1,AT1G27680.1,AT1G31800.1,AT1G52230.1,AT1G55510.1,AT1G68010.2,AT1G72520.1,AT1G79460.1,AT2G29630.2,AT2G30570.1,AT2G39930.1,AT3G03310.1,AT3G08940.2,AT3G18080.1,AT3G18680.1,AT3G23580.1,AT3G27540.1,AT3G45140.1,AT3G50820.1,AT3G55800.1,AT3G56940.1,AT4G03280.1,AT4G05180.1,AT4G12800.1,AT4G19810.1,AT4…	AO,APL2,APT5,AT3G18680,AT3G27540,AT4G33070,AT5G21105,AT5G58330,At1g55510,At4g39640,At5g17990,BGLU44,CRD1,CSLD5,CYP97A3,ChiC,DHS1,DHS2,FBA2,FNR2,FOLB2,GA2,GAPA-2,GDH1,GLYR2,HPR,ISA1,LCAT3,LHCB4.2,LHCB6,LOX2,LOX4,MENG,MGD1,PA2,PCK1,PETC,PGL1,PME44,PMEPCRA,PSAH2,PSAL,PSAN,PSBO2,PSBQ-2,PSBW,RNR2A,SAL1,SBPASE,SERAT1;1,SHM1,THIC,UGE1
	27 UNIPROT TERMS keywords significantly enriched
	#term ID	term description	observed gene count	background gene count	false discovery rate	matching proteins in your network (IDs)	matching proteins in your network (labels)
	KW-0150	Chloroplast	68	1501	1.03e-13	AT1G08380.1,AT1G09340.1,AT1G12250.1,AT1G12900.1,AT1G15820.1,AT1G17650.1,AT1G20020.1,AT1G23360.1,AT1G27680.1,AT1G30610.1,AT1G31800.1,AT1G32080.1,AT1G51110.1,AT1G52230.1,AT1G54780.1,AT1G56500.1,AT1G72520.1,AT1G75350.1,AT1G75690.1,AT1G79460.1,AT2G17840.1,AT2G21280.1,AT2G29630.2,AT2G29650.1,AT2G30570.1,AT2G31040.1,AT2G32480.1,AT2G37660.1,AT2G39140.1,AT2G39730.1,AT2G39930.1,AT2G41680.1,AT2G42220.1,AT2…	AO,APE2,APG3,APL2,ARASP,AT1G12250,AT1G51110,AT1G56500,AT2G31040,AT2G37660,AT2G42220,AT3G07700,AT4G01150,AT5G52970,AT5G58330,At5g17990,CRB,CRD1,CSP41A,CT-BMY,CYP97A3,CaS,DHS1,DHS2,EMB2279,ERD7,FBA2,FNR2,GA2,GAPA-2,GLYR2,HCF101,HCF136,INV-E,ISA1,J20,LHCB4.2,LHCB6,LOX2,LOX4,LQY1,LrgB,MENG,MGD1,NTRC,OTP84,PBRP,PETC,PHT4;1,PRXQ,PSAH2,PSAL,PSAN,PSAO,PSBO2,PSBQ-2,PSBW,PSI-P,PTAC5,RCA,SBPASE,SULA,SVR1,TH…
	KW-0793	Thylakoid	26	286	7.25e-11	AT1G08380.1,AT1G12250.1,AT1G15820.1,AT1G20020.1,AT1G51110.1,AT1G52230.1,AT1G54780.1,AT1G56500.1,AT1G75690.1,AT2G29650.1,AT2G30570.1,AT2G31040.1,AT2G46820.1,AT3G07700.3,AT3G08940.2,AT3G26060.2,AT3G50820.1,AT3G56940.1,AT4G01150.1,AT4G03280.1,AT4G05180.1,AT4G09010.1,AT5G23060.1,AT5G23120.1,AT5G52970.1,AT5G64040.2	AT1G12250,AT1G51110,AT1G56500,AT2G31040,AT3G07700,AT4G01150,AT5G52970,CRD1,CaS,FNR2,HCF136,LHCB4.2,LHCB6,LQY1,PETC,PHT4;1,PRXQ,PSAH2,PSAN,PSAO,PSBO2,PSBQ-2,PSBW,PSI-P,TL29,TLP18.3
	KW-0809	Transit peptide	68	1850	3.49e-10	AT1G08380.1,AT1G09340.1,AT1G12250.1,AT1G12900.1,AT1G17650.1,AT1G20020.1,AT1G23360.1,AT1G30610.1,AT1G31800.1,AT1G32080.1,AT1G51110.1,AT1G52230.1,AT1G54780.1,AT1G55510.1,AT1G56500.1,AT1G72520.1,AT1G75350.1,AT1G75690.1,AT1G79460.1,AT2G17840.1,AT2G21280.1,AT2G28930.1,AT2G29630.2,AT2G29650.1,AT2G30570.1,AT2G31040.1,AT2G32480.1,AT2G37660.1,AT2G39140.1,AT2G39730.1,AT2G39930.1,AT2G41680.1,AT2G42220.1,AT2…	AO,APE2,APG3,ARASP,AT1G12250,AT1G51110,AT1G56500,AT2G31040,AT2G37660,AT2G42220,AT3G07700,AT4G01150,AT5G52970,AT5G58330,At1g55510,At5g17990,CRB,CRD1,CSP41A,CT-BMY,CYP97A3,CaS,DHS1,DHS2,EMB2279,ERD7,FBA2,FNR2,GA2,GAPA-2,GLYR2,HCF101,HCF136,INV-E,ISA1,J20,LHCB4.2,LOX2,LOX4,LQY1,LrgB,MENG,MGD1,NTRC,OTP84,PETC,PHT4;1,PK1B,PRXQ,PSAH2,PSAL,PSAN,PSAO,PSBO2,PSBQ-2,PSBW,PSI-P,PTAC5,RCA,SBPASE,SHM1,SULA,SVR…
	KW-0602	Photosynthesis	12	112	1.24e-05	AT1G08380.1,AT1G15820.1,AT1G20020.1,AT1G52230.1,AT2G30570.1,AT3G08940.2,AT3G50820.1,AT3G56940.1,AT4G05180.1,AT4G12800.1,AT5G23120.1,AT5G64040.2	CRD1,FNR2,HCF136,LHCB4.2,LHCB6,PSAH2,PSAL,PSAN,PSAO,PSBO2,PSBQ-2,PSBW
	KW-0597	Phosphoprotein	53	1757	3.35e-05	AT1G09340.1,AT1G09570.1,AT1G11840.6,AT1G15340.1,AT1G20020.1,AT1G27680.1,AT1G28330.5,AT1G33060.2,AT1G55610.2,AT1G66350.1,AT1G70520.1,AT1G72180.1,AT1G73500.1,AT1G73590.1,AT1G76070.1,AT2G05940.1,AT2G24130.1,AT2G28930.1,AT2G31040.1,AT2G38470.1,AT2G39730.1,AT2G46820.1,AT3G08940.2,AT3G12490.2,AT3G16770.1,AT3G50700.1,AT3G51950.2,AT3G53960.1,AT3G59350.1,AT3G63140.1,AT4G03230.1,AT4G03280.1,AT4G05180.1,AT4…	APL2,AT1G72180,AT1G76070,AT2G24130,AT2G31040,AT3G51950,AT3G53960,AT3G59350,AT4G03230,AT4G08850,AT5G48800,At5g46330,BRL1,CINV2,CRB,CRK2,CSP41A,CYSB,CaS,DYL1,EBP,FBA2,FNR2,GLX1,HSF3,HSFA3,HSFA4A,IDD2,INV-E,LHCB4.2,MBD10,MKK9,MPA24.5,NAC014,NIK1,NIP1;2,PCK1,PETC,PHYA,PIN1,PK1B,PRR5,PRR7,PSBQ-2,PSI-P,PXY,RBOHD,RCA,RGL1,RIPK,SNAP33,TL29,WRKY33
	KW-0805	Transcription regulation	55	1996	0.00025	AT1G07090.1,AT1G09570.1,AT1G15340.1,AT1G19210.1,AT1G19850.1,AT1G27730.1,AT1G33060.2,AT1G46480.1,AT1G50420.1,AT1G52150.2,AT1G63100.1,AT1G66350.1,AT1G68360.1,AT2G18500.1,AT2G22540.1,AT2G27230.2,AT2G28510.1,AT2G31160.1,AT2G32100.1,AT2G33310.2,AT2G33620.2,AT2G34140.1,AT2G34710.1,AT2G35940.3,AT2G38470.1,AT2G41710.3,AT2G42610.1,AT2G46680.1,AT2G47260.1,AT2G47520.1,AT2G47620.1,AT3G07740.4,AT3G15210.1,AT3…	ADA2A,ANT,AT1G19210,AT1G63100,AT1G68360,AT2G28510,AT2G33620,AT2G34140,AT2G41710,AT5G51190,AT5G66770,ATHB-15,ATHB-7,BLH1,EBP,ERF-1,ERF4,ERF71,HSF3,HSFA3,HSFA4A,IAA13,IAA27,IDD2,LHW,LSH10,LSH3,LSH6,MBD10,MP,MYB15,MYB84,NAC014,OFP16,OFP7,PBRP,PC-MYB1,PHB,PHYA,PRR5,PRR7,PTAC5,PTL,REV,RGL1,SCL3,STZ,SVP,SWI3A,WOX13,WOX4,WRKY23,WRKY33,WRKY48,WRKY70
	KW-0560	Oxidoreductase	36	1172	0.001	AT1G02400.1,AT1G11840.6,AT1G12900.1,AT1G17650.1,AT1G20020.1,AT1G30040.1,AT1G31800.1,AT1G35190.1,AT1G55510.1,AT1G60420.1,AT1G68010.2,AT1G72520.1,AT1G75280.1,AT2G21280.1,AT2G27690.1,AT2G40370.1,AT2G41540.2,AT2G41680.1,AT3G14160.1,AT3G23580.1,AT3G26060.2,AT3G45140.1,AT3G48520.1,AT3G56940.1,AT4G09010.1,AT4G16765.1,AT4G29720.1,AT4G31500.1,AT5G06720.1,AT5G14760.1,AT5G16990.1,AT5G18170.1,AT5G21105.1,AT5…	AO,AT1G35190,AT1G60420,AT1G75280,AT3G14160,AT4G16765,AT5G16990,AT5G21105,AT5G58330,At1g55510,CRD1,CYP83B1,CYP94B1,CYP94B3,CYP94C1,CYP97A3,FNR2,GA2OX2,GA2OX6,GAPA-2,GDH1,GLX1,GLYR2,GPDHC1,HPR,LAC5,LOX2,LOX4,NTRC,PA2,PAO5,PRXQ,RBOHD,RNR2A,SULA,TL29
	KW-0603	Photosystem I	6	40	0.0012	AT1G08380.1,AT1G15820.1,AT1G52230.1,AT3G08940.2,AT4G12800.1,AT5G64040.2	LHCB4.2,LHCB6,PSAH2,PSAL,PSAN,PSAO
	KW-0604	Photosystem II	6	50	0.0033	AT1G15820.1,AT2G30570.1,AT3G08940.2,AT3G50820.1,AT4G05180.1,AT5G23120.1	HCF136,LHCB4.2,LHCB6,PSBO2,PSBQ-2,PSBW
	KW-0675	Receptor	21	578	0.0039	AT1G09570.1,AT1G55610.2,AT1G70520.1,AT1G72180.1,AT2G01820.1,AT2G24130.1,AT2G36570.1,AT2G41890.1,AT2G45340.1,AT2G48010.1,AT3G53380.1,AT4G03230.1,AT4G08850.1,AT4G22730.1,AT5G16000.1,AT5G23060.1,AT5G46330.1,AT5G47850.1,AT5G51350.1,AT5G61480.1,AT5G65700.2	AT1G72180,AT2G01820,AT2G24130,AT2G36570,AT2G41890,AT2G45340,AT3G53380,AT4G03230,AT4G08850,AT4G22730,At5g46330,BRL1,CCR4,CRK2,CaS,MOL1,MPA24.5,NIK1,PHYA,PXY,RKF3
	KW-0238	DNA-binding	48	1902	0.0041	AT1G07090.1,AT1G09340.1,AT1G15340.1,AT1G19210.1,AT1G19850.1,AT1G23380.2,AT1G33060.2,AT1G46480.1,AT1G52150.2,AT2G22540.1,AT2G27230.2,AT2G28510.1,AT2G31160.1,AT2G33620.2,AT2G34140.1,AT2G34710.1,AT2G35940.3,AT2G38470.1,AT2G41710.3,AT2G42610.1,AT2G46680.1,AT2G47260.1,AT2G47520.1,AT2G47620.1,AT3G07740.4,AT3G15210.1,AT3G16770.1,AT3G20015.1,AT3G23250.1,AT3G49690.1,AT3G50700.1,AT3G51950.2,AT3G56400.1,AT4…	ADA2A,ANT,AT1G19210,AT2G28510,AT2G33620,AT2G34140,AT2G41710,AT3G20015,AT3G51950,AT5G51190,AT5G59830,ATHB-15,ATHB-7,BLH1,CRB,EBP,ERF-1,ERF4,ERF71,HSF3,HSFA3,HSFA4A,IDD2,KNAT1,KNAT6,LHW,LRP1,LSH10,LSH3,LSH6,MBD10,MP,MYB15,MYB68,MYB84,NAC014,PC-MYB1,PHB,PTL,REV,SVP,SWI3A,WOX13,WOX4,WRKY23,WRKY33,WRKY48,WRKY70
	KW-0025	Alternative splicing	67	3004	0.0071	AT1G02860.1,AT1G09570.1,AT1G11840.6,AT1G12250.1,AT1G12430.2,AT1G12900.1,AT1G15340.1,AT1G16070.2,AT1G20020.1,AT1G23360.1,AT1G23380.2,AT1G28330.5,AT1G30040.1,AT1G30610.1,AT1G33060.2,AT1G52150.2,AT1G56500.1,AT1G68010.2,AT1G72250.2,AT2G16700.1,AT2G16890.2,AT2G17220.1,AT2G22540.1,AT2G28930.1,AT2G29650.1,AT2G32480.1,AT2G33310.2,AT2G33770.1,AT2G36870.1,AT2G39730.1,AT2G41710.3,AT2G46680.1,AT3G07740.4,AT3…	ADA2A,ADF5,APE2,ARASP,ARK3,AT1G12250,AT1G56500,AT1G72250,AT2G16890,AT2G41710,AT3G59350,AT3G62260,AT4G01150,AT4G08850,AT4G20430,AT5G03380,AT5G14920,AT5G26670,AT5G48800,AT5G58330,ATHB-15,ATHB-7,BT4,CINV2,CNGC5,CRD1,CYSB,ChiC,DHS2,DYL1,EMB2279,EXPB3,FBA2,FNR2,GA2OX2,GAPA-2,GLX1,GSL12,HPR,IAA13,IAMT1,J20,KNAT6,Kin3,LHCB4.2,LRP1,MBD10,MENG,MGD1,NAC014,NLA,PBRP,PC-MYB1,PETC,PHO2,PHT4;1,PHYA,PK1B,PRXQ,P…
	KW-0325	Glycoprotein	46	1874	0.0087	AT1G15000.1,AT1G33170.1,AT1G55610.2,AT1G62770.1,AT1G70520.1,AT1G72180.1,AT1G73590.1,AT2G01820.1,AT2G17230.1,AT2G24130.1,AT2G36570.1,AT2G40370.1,AT2G41890.1,AT2G48010.1,AT3G18080.1,AT3G20500.1,AT3G28340.1,AT3G45970.1,AT3G53190.1,AT3G53380.1,AT3G57030.1,AT3G58790.1,AT4G03210.1,AT4G03230.1,AT4G08850.1,AT4G19810.1,AT4G20430.1,AT4G25960.1,AT4G33220.1,AT4G39640.1,AT5G06720.1,AT5G08260.1,AT5G10180.1,AT5…	ABCB2,AT1G33170,AT1G62770,AT1G72180,AT2G01820,AT2G24130,AT2G36570,AT2G41890,AT3G53190,AT3G53380,AT3G57030,AT4G03230,AT4G08850,AT4G20430,AT5G14450,AT5G24010,AT5G26670,AT5G47550,AT5G56590,At4g39640,At5g46330,BCB,BGLU44,BRL1,CCR4,CRK2,ChiC,EXL5,EXLA1,GATL10,GAUT15,LAC5,MPA24.5,NIK1,PA2,PAP18,PAP29,PIN1,PME44,PXY,RKF3,SULTR2;1,TRN2,XTH9,scpl35,scpl50
	KW-0808	Transferase	74	3466	0.0103	AT1G02730.1,AT1G02860.1,AT1G09570.1,AT1G14790.1,AT1G18590.1,AT1G19600.1,AT1G23360.1,AT1G24330.1,AT1G27680.1,AT1G29340.1,AT1G33170.1,AT1G49850.1,AT1G55610.2,AT1G70520.1,AT1G72180.1,AT1G73500.1,AT1G73880.1,AT1G77280.1,AT1G80870.1,AT2G01820.1,AT2G05940.1,AT2G16890.2,AT2G17220.1,AT2G24130.1,AT2G26250.1,AT2G28930.1,AT2G33770.1,AT2G36870.1,AT2G41640.1,AT2G41890.1,AT2G44830.1,AT2G45340.1,AT2G48010.1,AT3…	APL2,APT5,AT1G19600,AT1G24330,AT1G33170,AT1G49850,AT1G72180,AT1G77280,AT1G80870,AT2G01820,AT2G16890,AT2G24130,AT2G41640,AT2G41890,AT2G44830,AT2G45340,AT3G05510,AT3G07700,AT3G18680,AT3G27540,AT3G53380,AT3G59350,AT4G03230,AT4G08850,AT4G22730,AT4G32250,AT5G01210,AT5G17980,AT5G24010,AT5G38020,AT5G40250,AT5G54400,ATL2,At4g39640,At5g17990,At5g46330,BRL1,CCR4,CRK2,CSLA02,CSLD5,DHS1,DHS2,GALS3,GATL10,GAU…
	KW-0371	Homeobox	9	159	0.0109	AT1G23380.2,AT1G46480.1,AT1G52150.2,AT2G34710.1,AT2G35940.3,AT2G46680.1,AT4G08150.1,AT4G35550.1,AT5G60690.1	ATHB-15,ATHB-7,BLH1,KNAT1,KNAT6,PHB,REV,WOX13,WOX4
	KW-0223	Dioxygenase	7	99	0.0116	AT1G02400.1,AT1G11840.6,AT1G30040.1,AT1G35190.1,AT1G72520.1,AT3G14160.1,AT3G45140.1	AT1G35190,AT3G14160,GA2OX2,GA2OX6,GLX1,LOX2,LOX4
	KW-0939	Gibberellin signaling pathway	5	51	0.0158	AT1G22690.1,AT1G66350.1,AT1G68360.1,AT3G50700.1,AT5G14920.1	AT1G22690,AT1G68360,AT5G14920,IDD2,RGL1
	KW-0961	Cell wall biogenesis/degradation	16	447	0.0158	AT1G02730.1,AT1G11580.1,AT1G12780.1,AT2G03090.1,AT2G36870.1,AT3G28340.1,AT3G58790.1,AT4G02290.1,AT4G03210.1,AT4G20170.1,AT4G28250.1,AT4G33220.1,AT5G13000.1,AT5G22740.1,AT5G26670.1,AT5G56590.1	AT5G26670,AT5G56590,CSLA02,CSLD5,EXPA15,EXPB3,GALS3,GATL10,GAUT15,GH9B13,GSL12,PME44,PMEPCRA,UGE1,XTH32,XTH9
	KW-1003	Cell membrane	31	1169	0.0161	AT1G55610.2,AT1G69870.1,AT1G72180.1,AT1G73590.1,AT1G80870.1,AT2G05940.1,AT2G17220.1,AT2G24130.1,AT2G26910.1,AT2G28930.1,AT2G36570.1,AT2G41890.1,AT2G48010.1,AT3G16770.1,AT3G50830.1,AT3G53380.1,AT3G54950.1,AT3G59350.1,AT4G03230.1,AT4G08850.1,AT5G03380.1,AT5G13000.1,AT5G16000.1,AT5G20230.1,AT5G46330.1,AT5G49630.1,AT5G53130.1,AT5G56590.1,AT5G57940.1,AT5G61480.1,AT5G65700.2	AAP6,ABCG32,AT1G72180,AT1G80870,AT2G24130,AT2G36570,AT2G41890,AT3G53380,AT3G59350,AT4G03230,AT4G08850,AT5G03380,AT5G56590,At5g46330,BCB,BRL1,CNGC1,CNGC5,COR413-PM2,EBP,GSL12,Kin3,MPA24.5,NIK1,NRT1.7,PIN1,PK1B,PLP7,PXY,RIPK,RKF3
	KW-0217	Developmental protein	19	608	0.023	AT1G07090.1,AT1G19850.1,AT1G28330.5,AT1G46480.1,AT1G66350.1,AT1G68360.1,AT2G22540.1,AT2G27230.2,AT2G31160.1,AT2G42610.1,AT2G47620.1,AT3G49690.1,AT4G35550.1,AT4G37750.1,AT5G03680.1,AT5G12330.4,AT5G46700.1,AT5G61480.1,AT5G65700.2	ANT,AT1G68360,DYL1,LHW,LRP1,LSH10,LSH3,LSH6,MP,MPA24.5,MYB84,PTL,PXY,RGL1,SVP,SWI3A,TRN2,WOX13,WOX4
	KW-0119	Carbohydrate metabolism	9	187	0.0235	AT1G09340.1,AT1G12780.1,AT2G39930.1,AT3G55800.1,AT4G02290.1,AT4G09510.1,AT4G17090.1,AT4G19810.1,AT5G22510.1	CINV2,CRB,CT-BMY,ChiC,GH9B13,INV-E,ISA1,SBPASE,UGE1
	KW-0346	Stress response	17	520	0.0235	AT1G17650.1,AT1G33060.2,AT1G73500.1,AT1G74520.1,AT2G38470.1,AT2G41540.2,AT2G46680.1,AT3G07700.3,AT3G23250.1,AT3G62130.1,AT4G13670.1,AT4G18880.1,AT4G29720.1,AT4G33070.1,AT4G36830.1,AT5G03720.1,AT5G16820.2	AT3G07700,AT4G33070,ATHB-7,GLYR2,GPDHC1,HOS3-1,HSF3,HSFA3,HSFA4A,HVA22A,LCD,MKK9,MYB15,NAC014,PAO5,PTAC5,WRKY33
	KW-0010	Activator	16	497	0.0334	AT1G19210.1,AT1G19850.1,AT1G33060.2,AT2G27230.2,AT2G41710.3,AT2G47520.1,AT2G47620.1,AT3G49690.1,AT4G17500.1,AT4G18880.1,AT4G32730.2,AT4G37750.1,AT5G03720.1,AT5G12330.4,AT5G16820.2,AT5G51190.1	ANT,AT1G19210,AT2G41710,AT5G51190,ERF-1,ERF71,HSF3,HSFA3,HSFA4A,LHW,LRP1,MP,MYB84,NAC014,PC-MYB1,SWI3A
	KW-0221	Differentiation	8	164	0.0334	AT1G52150.2,AT1G66350.1,AT1G68360.1,AT2G22540.1,AT2G34710.1,AT4G37750.1,AT5G60690.1,AT5G65700.2	ANT,AT1G68360,ATHB-15,MPA24.5,PHB,REV,RGL1,SVP
	KW-0472	Membrane	122	6648	0.0334	AT1G02730.1,AT1G08380.1,AT1G11120.1,AT1G14270.1,AT1G15820.1,AT1G20020.1,AT1G32080.1,AT1G33060.2,AT1G33170.1,AT1G52230.1,AT1G54780.1,AT1G55610.2,AT1G56500.1,AT1G61260.1,AT1G64720.1,AT1G68220.1,AT1G69870.1,AT1G70520.1,AT1G72180.1,AT1G73590.1,AT1G74520.1,AT1G75690.1,AT1G80870.1,AT2G01820.1,AT2G03090.1,AT2G05940.1,AT2G17220.1,AT2G21280.1,AT2G24130.1,AT2G26250.1,AT2G26500.1,AT2G26910.1,AT2G27690.1,AT2…	AAP6,ABCB2,ABCG32,APE2,ARASP,AT1G11120,AT1G14270,AT1G33170,AT1G56500,AT1G61260,AT1G68220,AT1G72180,AT1G80870,AT2G01820,AT2G24130,AT2G26500,AT2G29660,AT2G31040,AT2G31820,AT2G36570,AT2G41640,AT2G41890,AT2G42220,AT2G45340,AT3G07700,AT3G15110,AT3G21690,AT3G25130,AT3G27540,AT3G51670,AT3G53380,AT3G53960,AT3G59350,AT4G01150,AT4G03230,AT4G08850,AT4G22730,AT4G24110,AT4G39900,AT5G03380,AT5G16010,AT5G17980,…
	KW-0723	Serine/threonine-protein kinase	21	741	0.0334	AT1G55610.2,AT1G70520.1,AT1G72180.1,AT1G73500.1,AT1G80870.1,AT2G01820.1,AT2G05940.1,AT2G17220.1,AT2G24130.1,AT2G28930.1,AT2G41890.1,AT2G48010.1,AT3G53380.1,AT4G03230.1,AT4G08850.1,AT5G16000.1,AT5G24010.1,AT5G46330.1,AT5G47850.1,AT5G61480.1,AT5G65700.2	AT1G72180,AT1G80870,AT2G01820,AT2G24130,AT2G41890,AT3G53380,AT4G03230,AT4G08850,AT5G24010,At5g46330,BRL1,CCR4,CRK2,Kin3,MKK9,MPA24.5,NIK1,PK1B,PXY,RIPK,RKF3
	KW-0418	Kinase	32	1316	0.0357	AT1G09570.1,AT1G19600.1,AT1G55610.2,AT1G70520.1,AT1G72180.1,AT1G73500.1,AT1G77280.1,AT1G80870.1,AT2G01820.1,AT2G05940.1,AT2G17220.1,AT2G24130.1,AT2G28930.1,AT2G41890.1,AT2G44830.1,AT2G45340.1,AT2G48010.1,AT3G07700.3,AT3G18680.1,AT3G53380.1,AT3G59350.1,AT4G03230.1,AT4G08850.1,AT4G22730.1,AT4G32250.2,AT5G16000.1,AT5G24010.1,AT5G46330.1,AT5G47850.1,AT5G51350.1,AT5G61480.1,AT5G65700.2	AT1G19600,AT1G72180,AT1G77280,AT1G80870,AT2G01820,AT2G24130,AT2G41890,AT2G44830,AT2G45340,AT3G07700,AT3G18680,AT3G53380,AT3G59350,AT4G03230,AT4G08850,AT4G22730,AT4G32250,AT5G24010,At5g46330,BRL1,CCR4,CRK2,Kin3,MKK9,MOL1,MPA24.5,NIK1,PHYA,PK1B,PXY,RIPK,RKF3
	KW-0927	Auxin signaling pathway	8	172	0.0365	AT1G19850.1,AT1G21410.1,AT1G73590.1,AT2G33310.2,AT4G29080.1,AT4G35020.2,AT5G12330.4,AT5G46700.1	IAA13,IAA27,LRP1,MP,PIN1,RAC3,SKP2A,TRN2
	KW-1184	Jasmonic acid signaling pathway	4	43	0.0365	AT2G27690.1,AT3G48520.1,AT3G56400.1,AT5G63450.1	CYP94B1,CYP94B3,CYP94C1,WRKY70
	4 PFAM Protein Domains significantly enriched
	#term ID	term description	observed gene count	background gene count	false discovery rate	matching proteins in your network (IDs)	matching proteins in your network (labels)
	PF00046	Homeobox domain	9	92	0.0068	AT1G23380.2,AT1G46480.1,AT1G52150.2,AT2G34710.1,AT2G35940.3,AT2G46680.1,AT4G08150.1,AT4G35550.1,AT5G60690.1	ATHB-15,ATHB-7,BLH1,KNAT1,KNAT6,PHB,REV,WOX13,WOX4
	PF08263	Leucine rich repeat N-terminal domain	13	211	0.0068	AT1G55610.2,AT1G72180.1,AT2G01820.1,AT2G36570.1,AT2G45340.1,AT4G08850.1,AT4G22730.1,AT4G29240.1,AT5G16000.1,AT5G46330.1,AT5G51350.1,AT5G61480.1,AT5G65700.2	AT1G72180,AT2G01820,AT2G36570,AT2G45340,AT4G08850,AT4G22730,AT4G29240,At5g46330,BRL1,MOL1,MPA24.5,NIK1,PXY
	PF08670	MEKHLA domain	3	5	0.0219	AT1G52150.2,AT2G34710.1,AT5G60690.1	ATHB-15,PHB,REV
	PF13460	NAD(P)H-binding	6	62	0.0469	AT1G09340.1,AT1G75280.1,AT2G21280.1,AT2G37660.1,AT3G63140.1,AT5G14700.1	AT1G75280,AT2G37660,AT5G14700,CRB,CSP41A,SULA
	INTERPRO Protein Domains and Features
	#term ID	term description	observed gene count	background gene count	false discovery rate	matching proteins in your network (IDs)	matching proteins in your network (labels)
	IPR001356	Homeobox domain	9	97	0.0117	AT1G23380.2,AT1G46480.1,AT1G52150.2,AT2G34710.1,AT2G35940.3,AT2G46680.1,AT4G08150.1,AT4G35550.1,AT5G60690.1	ATHB-15,ATHB-7,BLH1,KNAT1,KNAT6,PHB,REV,WOX13,WOX4
	IPR013210	Leucine-rich repeat-containing N-terminal, plant-type	13	208	0.0117	AT1G55610.2,AT1G72180.1,AT2G01820.1,AT2G36570.1,AT2G45340.1,AT4G08850.1,AT4G22730.1,AT4G29240.1,AT5G16000.1,AT5G46330.1,AT5G51350.1,AT5G61480.1,AT5G65700.2	AT1G72180,AT2G01820,AT2G36570,AT2G45340,AT4G08850,AT4G22730,AT4G29240,At5g46330,BRL1,MOL1,MPA24.5,NIK1,PXY
	IPR016040	NAD(P)-binding domain	12	172	0.0117	AT1G09340.1,AT1G12780.1,AT1G17650.1,AT1G68010.2,AT1G75280.1,AT2G21280.1,AT2G37660.1,AT2G41540.2,AT3G63140.1,AT5G14700.1,AT5G18170.1,AT5G58330.1	AT1G75280,AT2G37660,AT5G14700,AT5G58330,CRB,CSP41A,GDH1,GLYR2,GPDHC1,HPR,SULA,UGE1
	IPR013978	MEKHLA	3	5	0.0277	AT1G52150.2,AT2G34710.1,AT5G60690.1	ATHB-15,PHB,REV
	IPR036291	NAD(P)-binding domain superfamily	15	339	0.0317	AT1G09340.1,AT1G12780.1,AT1G12900.1,AT1G17650.1,AT1G68010.2,AT1G75280.1,AT2G21280.1,AT2G37660.1,AT2G41540.2,AT3G63140.1,AT5G14700.1,AT5G16990.1,AT5G18170.1,AT5G50130.1,AT5G58330.1	AT1G75280,AT2G37660,AT5G14700,AT5G16990,AT5G50130,AT5G58330,CRB,CSP41A,GAPA-2,GDH1,GLYR2,GPDHC1,HPR,SULA,UGE1

## Sheet: Table_S4
	Supplementary Table 4. Gene network interactions of 403 common DEGs analyzed by STRING database
	#node1	node2	node1_string_internal_id	node2_string_internal_id	node1_external_id	node2_external_id	neighborhood_on_chromosome	gene_fusion	phylogenetic_cooccurrence	homology	coexpression	experimentally_determined_interaction	database_annotated	automated_textmining	combined_score
	PSBQ-2	PSBO2	625139	623254	3702.AT4G05180.1	3702.AT3G50820.1	0	0	0	0	0.98	0.73	0.36	0.976	0.999
	PSAL	PSAO	625711	608627	3702.AT4G12800.1	3702.AT1G08380.1	0	0	0	0	0.986	0.879	0.36	0	0.998
	PSBQ-2	PSBW	625139	617266	3702.AT4G05180.1	3702.AT2G30570.1	0	0	0	0	0.985	0.605	0	0.796	0.998
	PSAL	PSAH2	625711	612091	3702.AT4G12800.1	3702.AT1G52230.1	0	0	0	0	0.874	0.884	0.36	0.848	0.998
	PSBQ-2	LHCB4.2	625139	620000	3702.AT4G05180.1	3702.AT3G08940.2	0	0	0	0	0.984	0.743	0	0.382	0.997
	PSBO2	LHCB6	623254	609430	3702.AT3G50820.1	3702.AT1G15820.1	0	0	0	0	0.981	0.591	0	0.696	0.997
	PSBO2	LHCB4.2	623254	620000	3702.AT3G50820.1	3702.AT3G08940.2	0	0	0	0	0.964	0.807	0	0.471	0.996
	PSAH2	PSAO	612091	608627	3702.AT1G52230.1	3702.AT1G08380.1	0	0	0	0	0.961	0.809	0.36	0.42	0.996
	AT3G47650	LQY1	622907	614373	3702.AT3G47650.1	3702.AT1G75690.1	0	0	0	0	0.958	0	0	0.909	0.996
	FBA2	SBPASE	628603	623790	3702.AT4G38970.1	3702.AT3G55800.1	0	0	0	0	0.887	0	0.9	0.713	0.996
	PSBQ-2	LHCB6	625139	609430	3702.AT4G05180.1	3702.AT1G15820.1	0	0	0	0	0.986	0	0	0.693	0.995
	LHCB4.2	LHCB6	620000	609430	3702.AT3G08940.2	3702.AT1G15820.1	0	0	0	0.765	0.986	0.612	0	0.642	0.995
	PSAL	PSBW	625711	617266	3702.AT4G12800.1	3702.AT2G30570.1	0	0	0	0	0.986	0	0	0.699	0.995
	SBPASE	GAPA-2	623790	609120	3702.AT3G55800.1	3702.AT1G12900.1	0.178	0	0	0	0.985	0	0	0.528	0.993
	PSBO2	PSBW	623254	617266	3702.AT3G50820.1	3702.AT2G30570.1	0	0	0	0	0.956	0.533	0	0.709	0.993
	FBA2	GAPA-2	628603	609120	3702.AT4G38970.1	3702.AT1G12900.1	0.14	0	0	0	0.956	0.094	0.65	0.508	0.993
	PSBO2	RCA	623254	618258	3702.AT3G50820.1	3702.AT2G39730.1	0	0	0	0	0.982	0	0	0.567	0.992
	PSBQ-2	PSAO	625139	608627	3702.AT4G05180.1	3702.AT1G08380.1	0	0	0	0	0.986	0	0	0.439	0.992
	RCA	GAPA-2	618258	609120	3702.AT2G39730.1	3702.AT1G12900.1	0	0	0	0	0.985	0.042	0	0.444	0.991
	TLP18.3	PSAO	612371	608627	3702.AT1G54780.1	3702.AT1G08380.1	0	0	0	0	0.98	0	0	0.52	0.99
	GAPA-2	CRB	609120	608726	3702.AT1G12900.1	3702.AT1G09340.1	0	0	0	0	0.985	0	0	0.32	0.99
	PSAL	PSI-P	625711	619027	3702.AT4G12800.1	3702.AT2G46820.1	0	0	0.274	0	0.842	0.655	0.36	0.645	0.989
	LQY1	TLP18.3	614373	612371	3702.AT1G75690.1	3702.AT1G54780.1	0	0	0	0	0.981	0	0	0.464	0.989
	LHCB6	PSAO	609430	608627	3702.AT1G15820.1	3702.AT1G08380.1	0	0	0	0	0.986	0	0	0.273	0.989
	RCA	CRB	618258	608726	3702.AT2G39730.1	3702.AT1G09340.1	0	0	0	0	0.985	0	0	0.272	0.989
	RCA	PSAO	618258	608627	3702.AT2G39730.1	3702.AT1G08380.1	0	0	0	0	0.985	0	0	0.257	0.988
	SBPASE	RCA	623790	618258	3702.AT3G55800.1	3702.AT2G39730.1	0	0	0	0	0.882	0	0	0.896	0.987
	PSBW	PSAO	617266	608627	3702.AT2G30570.1	3702.AT1G08380.1	0	0	0	0	0.986	0	0	0	0.986
	TLP18.3	GAPA-2	612371	609120	3702.AT1G54780.1	3702.AT1G12900.1	0.084	0	0	0	0.986	0	0	0	0.986
	PSBO2	CRB	623254	608726	3702.AT3G50820.1	3702.AT1G09340.1	0	0	0.22	0	0.982	0	0	0.097	0.986
	LHCB4.2	PSAO	620000	608627	3702.AT3G08940.2	3702.AT1G08380.1	0	0	0	0	0.968	0	0.54	0.081	0.985
	GAPA-2	PSAO	609120	608627	3702.AT1G12900.1	3702.AT1G08380.1	0	0	0	0	0.984	0	0	0	0.984
	AT2G26500	PSAO	616844	608627	3702.AT2G26500.1	3702.AT1G08380.1	0	0	0	0	0.96	0	0	0.623	0.984
	CSP41A	PRXQ	624555	621899	3702.AT3G63140.1	3702.AT3G26060.2	0	0	0	0	0.983	0	0	0	0.983
	LHCB6	GAPA-2	609430	609120	3702.AT1G15820.1	3702.AT1G12900.1	0	0	0	0	0.983	0	0	0	0.983
	PSBQ-2	TLP18.3	625139	612371	3702.AT4G05180.1	3702.AT1G54780.1	0	0	0	0	0.982	0	0	0.105	0.983
	PSAN	PSAL	634646	625711	3702.AT5G64040.2	3702.AT4G12800.1	0	0	0	0	0.851	0	0.36	0.838	0.983
	SBPASE	CRB	623790	608726	3702.AT3G55800.1	3702.AT1G09340.1	0	0	0	0	0.983	0	0	0	0.983
	TLP18.3	CRB	612371	608726	3702.AT1G54780.1	3702.AT1G09340.1	0	0	0	0	0.982	0	0	0	0.982
	RCA	TLP18.3	618258	612371	3702.AT2G39730.1	3702.AT1G54780.1	0	0	0	0	0.982	0	0	0	0.982
	PETC	PSBO2	624981	623254	3702.AT4G03280.1	3702.AT3G50820.1	0	0	0.231	0	0.827	0	0	0.864	0.98
	PSBO2	GAPA-2	623254	609120	3702.AT3G50820.1	3702.AT1G12900.1	0	0	0	0	0.977	0	0	0.082	0.978
	CSP41A	CRB	624555	608726	3702.AT3G63140.1	3702.AT1G09340.1	0	0	0.337	0.82	0.888	0.765	0	0.986	0.978
	PCK1	SBPASE	628490	623790	3702.AT4G37870.1	3702.AT3G55800.1	0.19	0	0	0	0.899	0	0	0.759	0.978
	PSBW	LHCB6	617266	609430	3702.AT2G30570.1	3702.AT1G15820.1	0	0	0	0	0.728	0.8	0	0.611	0.977
	PSAN	PSBQ-2	634646	625139	3702.AT5G64040.2	3702.AT4G05180.1	0	0	0	0	0.864	0	0	0.835	0.976
	PXY	WOX4	634378	611574	3702.AT5G61480.1	3702.AT1G46480.1	0	0	0	0	0.118	0	0	0.973	0.975
	PRXQ	GAPA-2	621899	609120	3702.AT3G26060.2	3702.AT1G12900.1	0.152	0	0	0	0.971	0	0	0.072	0.975
	FBA2	RCA	628603	618258	3702.AT4G38970.1	3702.AT2G39730.1	0	0	0	0	0.949	0.043	0	0.529	0.975
	PSBW	GAPA-2	617266	609120	3702.AT2G30570.1	3702.AT1G12900.1	0	0	0	0	0.966	0	0	0.272	0.974
	PSBO2	PSAO	623254	608627	3702.AT3G50820.1	3702.AT1G08380.1	0	0	0	0	0.974	0	0	0	0.974
	PRXQ	CRB	621899	608726	3702.AT3G26060.2	3702.AT1G09340.1	0	0	0	0	0.974	0	0	0	0.974
	PSAN	PSAO	634646	608627	3702.AT5G64040.2	3702.AT1G08380.1	0	0	0	0	0.859	0	0.54	0.644	0.974
	CSP41A	TLP18.3	624555	612371	3702.AT3G63140.1	3702.AT1G54780.1	0	0	0.22	0	0.968	0	0	0	0.974
	AT5G58330	PCK1	634048	628490	3702.AT5G58330.1	3702.AT4G37870.1	0	0	0	0	0.146	0	0.9	0.726	0.974
	FBA2	LHCB6	628603	609430	3702.AT4G38970.1	3702.AT1G15820.1	0	0	0	0	0.973	0	0	0	0.973
	AT5G58330	APE2	634048	632718	3702.AT5G58330.1	3702.AT5G46110.4	0	0	0	0	0.952	0	0	0.472	0.973
	PRXQ	SULA	621899	616306	3702.AT3G26060.2	3702.AT2G21280.1	0.19	0	0	0	0.968	0	0	0	0.973
	PSBO2	TLP18.3	623254	612371	3702.AT3G50820.1	3702.AT1G54780.1	0	0	0	0	0.96	0	0	0.344	0.972
	LHCB4.2	PSBW	620000	617266	3702.AT3G08940.2	3702.AT2G30570.1	0	0	0	0	0.958	0.312	0	0.076	0.971
	AT4G01150	TLP18.3	624737	612371	3702.AT4G01150.1	3702.AT1G54780.1	0	0	0.301	0	0.959	0	0	0	0.97
	PSI-P	PSAO	619027	608627	3702.AT2G46820.1	3702.AT1G08380.1	0	0	0	0	0.716	0	0.9	0	0.97
	PSAL	PSBQ-2	625711	625139	3702.AT4G12800.1	3702.AT4G05180.1	0	0	0	0	0.888	0	0	0.737	0.969
	PRXQ	TLP18.3	621899	612371	3702.AT3G26060.2	3702.AT1G54780.1	0	0	0	0	0.968	0	0	0.06	0.969
	SHM1	HPR	628497	613587	3702.AT4G37930.1	3702.AT1G68010.2	0.084	0	0	0	0.834	0	0	0.816	0.969
	AT2G26500	TLP18.3	616844	612371	3702.AT2G26500.1	3702.AT1G54780.1	0	0	0	0	0.968	0	0	0	0.968
	CaS	TLP18.3	630907	612371	3702.AT5G23060.1	3702.AT1G54780.1	0	0	0	0	0.968	0	0	0	0.968
	PSBW	AT2G26500	617266	616844	3702.AT2G30570.1	3702.AT2G26500.1	0	0	0	0	0.968	0	0	0	0.968
	PRXQ	AT2G26500	621899	616844	3702.AT3G26060.2	3702.AT2G26500.1	0	0	0	0	0.945	0	0	0.44	0.968
	LHCB4.2	GAPA-2	620000	609120	3702.AT3G08940.2	3702.AT1G12900.1	0	0	0	0	0.968	0	0	0	0.968
	AT4G01150	RCA	624737	618258	3702.AT4G01150.1	3702.AT2G39730.1	0	0	0.359	0	0.95	0	0	0.045	0.967
	PSAN	PSI-P	634646	619027	3702.AT5G64040.2	3702.AT2G46820.1	0	0	0	0	0.863	0	0.54	0.522	0.967
	PSAL	AT2G26500	625711	616844	3702.AT4G12800.1	3702.AT2G26500.1	0	0	0	0	0.965	0	0	0	0.965
	PSAL	PSBO2	625711	623254	3702.AT4G12800.1	3702.AT3G50820.1	0	0	0.366	0	0.851	0	0	0.663	0.965
	CaS	RCA	630907	618258	3702.AT5G23060.1	3702.AT2G39730.1	0	0	0	0	0.962	0	0	0.105	0.965
	PRXQ	NTRC	621899	618481	3702.AT3G26060.2	3702.AT2G41680.1	0.19	0	0	0	0.52	0	0	0.918	0.965
	PSAN	PSAH2	634646	612091	3702.AT5G64040.2	3702.AT1G52230.1	0	0	0	0	0.863	0	0.36	0.642	0.965
	APE2	PSAO	632718	608627	3702.AT5G46110.4	3702.AT1G08380.1	0	0	0	0	0.964	0	0	0	0.964
	SULA	CRB	616306	608726	3702.AT2G21280.1	3702.AT1G09340.1	0	0	0	0	0.964	0	0	0	0.964
	AO	PETC	630099	624981	3702.AT5G14760.1	3702.AT4G03280.1	0.189	0	0	0	0.898	0.157	0	0.557	0.964
	LHCB4.2	TLP18.3	620000	612371	3702.AT3G08940.2	3702.AT1G54780.1	0	0	0	0	0.963	0	0	0	0.963
	APE2	TLP18.3	632718	612371	3702.AT5G46110.4	3702.AT1G54780.1	0	0	0	0	0.962	0	0	0	0.962
	CaS	LHCB4.2	630907	620000	3702.AT5G23060.1	3702.AT3G08940.2	0	0	0	0	0.951	0	0	0.27	0.962
	TLP18.3	LHCB6	612371	609430	3702.AT1G54780.1	3702.AT1G15820.1	0	0	0	0	0.962	0	0	0.047	0.962
	APE2	AT2G26500	632718	616844	3702.AT5G46110.4	3702.AT2G26500.1	0	0	0	0	0.961	0	0	0	0.961
	ENH1	CRB	630351	608726	3702.AT5G17170.1	3702.AT1G09340.1	0	0	0	0	0.96	0	0	0	0.96
	LHCB4.2	RCA	620000	618258	3702.AT3G08940.2	3702.AT2G39730.1	0	0	0	0	0.959	0	0	0.047	0.959
	AT2G26500	CRB	616844	608726	3702.AT2G26500.1	3702.AT1G09340.1	0	0	0	0	0.959	0	0	0	0.959
	CSP41A	SULA	624555	616306	3702.AT3G63140.1	3702.AT2G21280.1	0	0	0	0	0.957	0	0	0	0.957
	SBPASE	SULA	623790	616306	3702.AT3G55800.1	3702.AT2G21280.1	0	0	0	0	0.957	0	0	0	0.957
	AT4G01150	PSI-P	624737	619027	3702.AT4G01150.1	3702.AT2G46820.1	0	0	0.266	0.824	0.956	0	0	0	0.957
	LHCB4.2	PSI-P	620000	619027	3702.AT3G08940.2	3702.AT2G46820.1	0	0	0	0	0.842	0	0.54	0.451	0.956
	PSAL	PETC	625711	624981	3702.AT4G12800.1	3702.AT4G03280.1	0	0	0.241	0	0.879	0	0	0.564	0.956
	AT4G01150	AT3G47650	624737	622907	3702.AT4G01150.1	3702.AT3G47650.1	0	0	0	0	0.955	0	0	0	0.955
	emb2726	PRXQ	627535	621899	3702.AT4G29060.1	3702.AT3G26060.2	0.19	0	0	0	0.946	0	0	0	0.955
	AT4G01150	LHCB6	624737	609430	3702.AT4G01150.1	3702.AT1G15820.1	0	0	0	0	0.954	0	0	0	0.954
	PSBQ-2	GAPA-2	625139	609120	3702.AT4G05180.1	3702.AT1G12900.1	0	0	0	0	0.953	0	0	0	0.953
	PSAN	PSBO2	634646	623254	3702.AT5G64040.2	3702.AT3G50820.1	0	0	0	0	0.854	0	0	0.694	0.953
	PSAL	DAC	625711	621007	3702.AT4G12800.1	3702.AT3G17930.1	0	0	0	0	0.915	0	0	0.461	0.952
	CaS	AT3G47650	630907	622907	3702.AT5G23060.1	3702.AT3G47650.1	0	0	0	0	0.951	0	0	0	0.951
	OFP16	OFP7	617440	616005	3702.AT2G32100.1	3702.AT2G18500.1	0	0	0	0	0	0	0	0.951	0.951
	AT2G26500	GAPA-2	616844	609120	3702.AT2G26500.1	3702.AT1G12900.1	0	0	0	0	0.951	0	0	0	0.951
	AT4G01150	PSAO	624737	608627	3702.AT4G01150.1	3702.AT1G08380.1	0	0	0	0	0.95	0	0	0	0.95
	PSBW	PSAH2	617266	612091	3702.AT2G30570.1	3702.AT1G52230.1	0	0	0	0	0.85	0	0	0.679	0.95
	PETC	SBPASE	624981	623790	3702.AT4G03280.1	3702.AT3G55800.1	0.058	0	0	0	0.879	0	0	0.601	0.95
	ENH1	PRXQ	630351	621899	3702.AT5G17170.1	3702.AT3G26060.2	0	0	0	0	0.95	0	0	0	0.95
	AT3G47650	PSI-P	622907	619027	3702.AT3G47650.1	3702.AT2G46820.1	0	0	0	0	0.95	0	0	0	0.95
	AT3G47650	AT2G26500	622907	616844	3702.AT3G47650.1	3702.AT2G26500.1	0	0	0	0	0.95	0	0	0	0.95
	ENH1	GAPA-2	630351	609120	3702.AT5G17170.1	3702.AT1G12900.1	0	0	0	0	0.949	0	0	0	0.949
	LHCB4.2	AT2G26500	620000	616844	3702.AT3G08940.2	3702.AT2G26500.1	0	0	0	0	0.949	0	0	0	0.949
	ENH1	CSP41A	630351	624555	3702.AT5G17170.1	3702.AT3G63140.1	0	0	0	0	0.949	0	0	0	0.949
	RCA	HPR	618258	613587	3702.AT2G39730.1	3702.AT1G68010.2	0	0	0	0	0.873	0	0	0.616	0.949
	AT5G58330	TLP18.3	634048	612371	3702.AT5G58330.1	3702.AT1G54780.1	0.074	0	0	0	0.947	0	0	0	0.949
	CaS	AT4G01150	630907	624737	3702.AT5G23060.1	3702.AT4G01150.1	0	0	0	0	0.949	0	0	0	0.949
	CaS	PSAO	630907	608627	3702.AT5G23060.1	3702.AT1G08380.1	0	0	0	0	0.948	0	0	0	0.948
	AT3G47650	TLP18.3	622907	612371	3702.AT3G47650.1	3702.AT1G54780.1	0	0	0	0	0.947	0	0	0	0.947
	PSBO2	DAC	623254	621007	3702.AT3G50820.1	3702.AT3G17930.1	0	0	0.253	0	0.727	0	0	0.756	0.946
	PSAL	LHCB6	625711	609430	3702.AT4G12800.1	3702.AT1G15820.1	0	0	0	0	0.879	0	0	0.568	0.946
	emb2726	AT3G47650	627535	622907	3702.AT4G29060.1	3702.AT3G47650.1	0	0	0	0	0.945	0	0	0	0.945
	WRKY33	STZ	618130	610593	3702.AT2G38470.1	3702.AT1G27730.1	0	0	0	0	0.865	0	0	0.61	0.945
	ENH1	TLP18.3	630351	612371	3702.AT5G17170.1	3702.AT1G54780.1	0	0	0	0	0.944	0	0	0	0.944
	CT-BMY	ISA1	626232	618283	3702.AT4G17090.1	3702.AT2G39930.1	0	0	0	0	0	0	0.9	0.472	0.944
	SULA	TLP18.3	616306	612371	3702.AT2G21280.1	3702.AT1G54780.1	0.054	0	0	0	0.943	0	0	0	0.944
	AT5G58330	ENH1	634048	630351	3702.AT5G58330.1	3702.AT5G17170.1	0	0	0	0	0.942	0	0	0	0.942
	PSAL	LHCB4.2	625711	620000	3702.AT4G12800.1	3702.AT3G08940.2	0	0	0	0	0.913	0	0.36	0	0.942
	ENH1	SULA	630351	616306	3702.AT5G17170.1	3702.AT2G21280.1	0	0	0	0	0.942	0	0	0	0.942
	PSBQ-2	AT3G47650	625139	622907	3702.AT4G05180.1	3702.AT3G47650.1	0	0	0	0	0.941	0	0	0	0.941
	AT3G47650	PSAO	622907	608627	3702.AT3G47650.1	3702.AT1G08380.1	0	0	0	0	0.941	0	0	0	0.941
	APE2	AT3G47650	632718	622907	3702.AT5G46110.4	3702.AT3G47650.1	0	0	0	0	0.941	0	0	0	0.941
	AT5G58330	AT4G01150	634048	624737	3702.AT5G58330.1	3702.AT4G01150.1	0	0	0	0	0.94	0	0	0	0.94
	LHCB4.2	PSAH2	620000	612091	3702.AT3G08940.2	3702.AT1G52230.1	0	0	0	0	0.888	0	0.36	0.216	0.939
	PSI-P	TLP18.3	619027	612371	3702.AT2G46820.1	3702.AT1G54780.1	0	0	0.233	0	0.923	0	0	0	0.938
	TLP18.3	PSAH2	612371	612091	3702.AT1G54780.1	3702.AT1G52230.1	0	0	0	0	0.888	0	0	0.467	0.938
	GDH1	PCK1	630457	628490	3702.AT5G18170.1	3702.AT4G37870.1	0.055	0	0	0	0.527	0	0.8	0.389	0.938
	AT4G01150	LHCB4.2	624737	620000	3702.AT4G01150.1	3702.AT3G08940.2	0	0	0	0	0.937	0	0	0	0.937
	AT5G58330	AT2G26500	634048	616844	3702.AT5G58330.1	3702.AT2G26500.1	0	0	0	0	0.886	0	0	0.464	0.936
	ENH1	AT1G12250	630351	609050	3702.AT5G17170.1	3702.AT1G12250.1	0	0	0	0	0.936	0	0	0	0.936
	PSAN	LHCB4.2	634646	620000	3702.AT5G64040.2	3702.AT3G08940.2	0	0	0	0	0.863	0	0.54	0.079	0.936
	SULA	GAPA-2	616306	609120	3702.AT2G21280.1	3702.AT1G12900.1	0	0	0	0	0.934	0	0	0.047	0.935
	emb2726	AT3G18680	627535	621091	3702.AT4G29060.1	3702.AT3G18680.1	0.19	0	0	0	0.858	0.044	0	0.473	0.934
	SBPASE	FNR2	623790	609854	3702.AT3G55800.1	3702.AT1G20020.1	0	0	0	0	0.854	0	0	0.568	0.934
	TRX1	NTRC	623277	618481	3702.AT3G51030.1	3702.AT2G41680.1	0.065	0	0	0	0.086	0.217	0	0.912	0.933
	PSAN	LHCB6	634646	609430	3702.AT5G64040.2	3702.AT1G15820.1	0	0	0	0	0.861	0	0	0.529	0.931
	APE2	HPR	632718	613587	3702.AT5G46110.4	3702.AT1G68010.2	0	0	0	0	0.87	0	0	0.485	0.93
	PETC	PSAH2	624981	612091	3702.AT4G03280.1	3702.AT1G52230.1	0	0	0	0	0.73	0	0	0.741	0.927
	PSBQ-2	PETC	625139	624981	3702.AT4G05180.1	3702.AT4G03280.1	0	0	0	0	0.87	0	0	0.456	0.926
	HSFA3	HSFA4A	629017	626431	3702.AT5G03720.1	3702.AT4G18880.1	0	0	0	0.764	0.1	0	0.9	0.864	0.925
	AT5G58330	SBPASE	634048	623790	3702.AT5G58330.1	3702.AT3G55800.1	0	0	0	0	0.637	0.078	0	0.794	0.925
	SHM1	SBPASE	628497	623790	3702.AT4G37930.1	3702.AT3G55800.1	0	0	0	0	0.872	0	0	0.427	0.923
	PETC	FNR2	624981	609854	3702.AT4G03280.1	3702.AT1G20020.1	0	0	0	0	0.697	0.082	0	0.744	0.922
	AT5G58330	AT1G12250	634048	609050	3702.AT5G58330.1	3702.AT1G12250.1	0	0	0	0	0.922	0	0	0	0.922
	SHM1	RCA	628497	618258	3702.AT4G37930.1	3702.AT2G39730.1	0	0	0	0	0.856	0	0	0.48	0.922
	PETC	AT2G26500	624981	616844	3702.AT4G03280.1	3702.AT2G26500.1	0	0	0	0	0.871	0	0	0.414	0.921
	FBA2	PSAO	628603	608627	3702.AT4G38970.1	3702.AT1G08380.1	0	0	0	0	0.921	0	0	0	0.921
	CSP41A	FNR2	624555	609854	3702.AT3G63140.1	3702.AT1G20020.1	0	0	0	0	0.876	0	0	0.392	0.921
	FBA2	AT4G01150	628603	624737	3702.AT4G38970.1	3702.AT4G01150.1	0	0	0	0	0.921	0	0	0	0.921
	AT3G05640	At1g55510	619688	612445	3702.AT3G05640.1	3702.AT1G55510.1	0	0	0	0	0	0.239	0.9	0	0.92
	PSAH2	LHCB6	612091	609430	3702.AT1G52230.1	3702.AT1G15820.1	0	0	0	0	0.873	0	0	0.392	0.919
	PSAN	TLP18.3	634646	612371	3702.AT5G64040.2	3702.AT1G54780.1	0	0	0	0	0.856	0	0	0.461	0.919
	ENH1	LQY1	630351	614373	3702.AT5G17170.1	3702.AT1G75690.1	0	0	0	0	0.918	0	0	0	0.918
	PSBO2	LQY1	623254	614373	3702.AT3G50820.1	3702.AT1G75690.1	0	0	0	0	0.842	0	0	0.498	0.917
	HSF3	HSFA3	630314	629017	3702.AT5G16820.2	3702.AT5G03720.1	0	0	0	0.81	0.042	0	0.9	0.939	0.917
	SBPASE	HPR	623790	613587	3702.AT3G55800.1	3702.AT1G68010.2	0	0	0	0	0.887	0.048	0	0.292	0.917
	HSF3	HSFA4A	630314	626431	3702.AT5G16820.2	3702.AT4G18880.1	0	0	0	0.79	0	0	0.9	0.81	0.916
	CRD1	LHCB6	623904	609430	3702.AT3G56940.1	3702.AT1G15820.1	0	0	0	0	0.848	0	0	0.461	0.915
	HCF136	PETC	630913	624981	3702.AT5G23120.1	3702.AT4G03280.1	0	0	0.301	0	0.688	0	0	0.643	0.915
	SBPASE	PRXQ	623790	621899	3702.AT3G55800.1	3702.AT3G26060.2	0.178	0	0	0	0.891	0	0	0.132	0.915
	PSAN	PETC	634646	624981	3702.AT5G64040.2	3702.AT4G03280.1	0	0	0	0	0.858	0	0	0.432	0.915
	PETC	RCA	624981	618258	3702.AT4G03280.1	3702.AT2G39730.1	0	0	0	0	0.871	0	0	0.353	0.913
	PSBQ-2	RCA	625139	618258	3702.AT4G05180.1	3702.AT2G39730.1	0	0	0	0	0.858	0	0	0.411	0.913
	RCA	PSBW	618258	617266	3702.AT2G39730.1	3702.AT2G30570.1	0	0	0	0	0.901	0	0	0.138	0.911
	LOX2	LOX4	622651	614050	3702.AT3G45140.1	3702.AT1G72520.1	0	0	0	0.922	0.06	0	0.9	0.903	0.908
	PSBQ-2	PSAH2	625139	612091	3702.AT4G05180.1	3702.AT1G52230.1	0	0	0	0	0.869	0	0	0.318	0.907
	FNR2	CRB	609854	608726	3702.AT1G20020.1	3702.AT1G09340.1	0	0	0	0	0.886	0	0	0.224	0.907
	AT3G53960	NRT1.7	623592	613787	3702.AT3G53960.1	3702.AT1G69870.1	0	0	0	0.834	0.115	0	0.9	0	0.907
	SBPASE	TLP18.3	623790	612371	3702.AT3G55800.1	3702.AT1G54780.1	0	0	0	0	0.907	0	0	0	0.907
	LQY1	GAPA-2	614373	609120	3702.AT1G75690.1	3702.AT1G12900.1	0	0	0	0	0.907	0	0	0	0.907
	PSAN	AT2G26500	634646	616844	3702.AT5G64040.2	3702.AT2G26500.1	0	0	0	0	0.852	0	0	0.392	0.906
	PSI-P	LHCB6	619027	609430	3702.AT2G46820.1	3702.AT1G15820.1	0	0	0	0	0.853	0	0	0.392	0.906
	AT3G54630	RNR2A	623659	621629	3702.AT3G54630.1	3702.AT3G23580.1	0	0	0	0	0.905	0	0	0.06	0.906
	PTR3	NRT1.7	632712	613787	3702.AT5G46050.1	3702.AT1G69870.1	0	0	0	0.84	0	0	0.9	0.42	0.906
	FBA2	LHCB4.2	628603	620000	3702.AT4G38970.1	3702.AT3G08940.2	0	0	0	0	0.905	0	0	0	0.905
	FBA2	PSBO2	628603	623254	3702.AT4G38970.1	3702.AT3G50820.1	0	0	0	0	0.884	0	0	0.216	0.905
	CRD1	TLP18.3	623904	612371	3702.AT3G56940.1	3702.AT1G54780.1	0	0	0.221	0	0.881	0	0	0	0.904
	PHO2	NLA	617623	608037	3702.AT2G33770.1	3702.AT1G02860.1	0	0	0	0	0	0	0	0.904	0.904
	AT5G58330	PRXQ	634048	621899	3702.AT5G58330.1	3702.AT3G26060.2	0.19	0	0	0	0.72	0	0	0.612	0.904
	PHO2	SKP2A	617623	609998	3702.AT2G33770.1	3702.AT1G21410.1	0	0	0	0	0.043	0.084	0.9	0	0.904
	APE2	GAPA-2	632718	609120	3702.AT5G46110.4	3702.AT1G12900.1	0	0	0	0	0.873	0	0	0.281	0.904
	PRXQ	TRX-M4	621899	620727	3702.AT3G26060.2	3702.AT3G15360.1	0	0	0	0	0.684	0	0	0.706	0.903
	DAC	AT2G26500	621007	616844	3702.AT3G17930.1	3702.AT2G26500.1	0	0	0	0	0.903	0	0	0	0.903
	PSI-P	PSAH2	619027	612091	3702.AT2G46820.1	3702.AT1G52230.1	0	0	0	0	0.855	0	0.36	0	0.903
	PSAN	CRD1	634646	623904	3702.AT5G64040.2	3702.AT3G56940.1	0	0	0	0	0.827	0	0	0.465	0.903
	AT3G47070	PSI-P	622854	619027	3702.AT3G47070.1	3702.AT2G46820.1	0	0	0	0	0.828	0	0	0.46	0.903
	PSBO2	PSAH2	623254	612091	3702.AT3G50820.1	3702.AT1G52230.1	0	0	0	0	0.854	0	0	0.352	0.902
	APE2	RCA	632718	618258	3702.AT5G46110.4	3702.AT2G39730.1	0	0	0	0	0.884	0	0	0.189	0.902
	PSAN	PSBW	634646	617266	3702.AT5G64040.2	3702.AT2G30570.1	0	0	0	0	0.696	0	0	0.69	0.901
	RBOHD	AT3G53960	632911	623592	3702.AT5G47910.1	3702.AT3G53960.1	0	0	0	0	0	0	0.9	0	0.9
	PTR3	AT3G53960	632712	623592	3702.AT5G46050.1	3702.AT3G53960.1	0	0	0	0.895	0	0	0.9	0	0.9
	RBOHD	PTR3	632911	632712	3702.AT5G47910.1	3702.AT5G46050.1	0	0	0	0	0	0	0.9	0	0.9
	AT4G35730	HBP1	628263	609559	3702.AT4G35730.1	3702.AT1G17100.1	0	0	0	0	0	0	0.9	0	0.9
	RBOHD	NRT1.7	632911	613787	3702.AT5G47910.1	3702.AT1G69870.1	0	0	0	0	0	0	0.9	0	0.9
	APT5	LOX4	629765	614050	3702.AT5G11160.1	3702.AT1G72520.1	0	0	0	0	0	0	0.9	0	0.9
	APT5	LOX2	629765	622651	3702.AT5G11160.1	3702.AT3G45140.1	0	0	0	0	0	0	0.9	0	0.9
	PRR7	PHYA	628917	608751	3702.AT5G02810.1	3702.AT1G09570.1	0	0	0	0	0	0.765	0	0.589	0.899
	FBA2	CRB	628603	608726	3702.AT4G38970.1	3702.AT1G09340.1	0	0	0	0	0.885	0	0	0.154	0.899
	HCF136	SBPASE	630913	623790	3702.AT5G23120.1	3702.AT3G55800.1	0	0	0	0	0.796	0.157	0	0.46	0.899
	RCA	LHCB6	618258	609430	3702.AT2G39730.1	3702.AT1G15820.1	0	0	0	0	0.849	0	0	0.353	0.898
	APG3	emb2184	624529	614342	3702.AT3G62910.1	3702.AT1G75350.1	0.19	0	0	0	0.431	0.738	0	0.26	0.898
	PSI-P	HPR	619027	613587	3702.AT2G46820.1	3702.AT1G68010.2	0	0	0	0	0.879	0	0	0.189	0.898
	PSAL	TLP18.3	625711	612371	3702.AT4G12800.1	3702.AT1G54780.1	0	0	0	0	0.896	0	0	0.05	0.897
	HPR	LrgB	613587	611016	3702.AT1G68010.2	3702.AT1G32080.1	0.058	0	0	0	0.688	0	0	0.68	0.897
	PSI-P	FNR2	619027	609854	3702.AT2G46820.1	3702.AT1G20020.1	0	0	0	0	0.643	0	0.72	0	0.896
	HPR	GAPA-2	613587	609120	3702.AT1G68010.2	3702.AT1G12900.1	0.074	0	0	0	0.875	0	0	0.156	0.894
	CSP41A	LQY1	624555	614373	3702.AT3G63140.1	3702.AT1G75690.1	0	0	0	0	0.894	0	0	0	0.894
	FBA2	HPR	628603	613587	3702.AT4G38970.1	3702.AT1G68010.2	0	0	0	0	0.868	0	0	0.23	0.894
	PSAL	RCA	625711	618258	3702.AT4G12800.1	3702.AT2G39730.1	0	0	0	0	0.875	0	0	0.19	0.894
	PSBO2	PSI-P	623254	619027	3702.AT3G50820.1	3702.AT2G46820.1	0	0	0	0	0.85	0	0	0.315	0.893
	CaS	CRB	630907	608726	3702.AT5G23060.1	3702.AT1G09340.1	0	0	0	0	0.893	0	0	0	0.893
	APE2	PETC	632718	624981	3702.AT5G46110.4	3702.AT4G03280.1	0	0	0	0	0.879	0	0	0.151	0.893
	PETC	GAPA-2	624981	609120	3702.AT4G03280.1	3702.AT1G12900.1	0	0	0	0	0.885	0	0	0.093	0.891
	PSI-P	LQY1	619027	614373	3702.AT2G46820.1	3702.AT1G75690.1	0	0	0	0	0.89	0	0	0	0.89
	TL29	SBPASE	625316	623790	3702.AT4G09010.1	3702.AT3G55800.1	0	0	0	0	0.846	0	0	0.307	0.889
	SHM1	CRB	628497	608726	3702.AT4G37930.1	3702.AT1G09340.1	0	0	0	0	0.875	0	0	0.154	0.889
	emb2726	emb2184	627535	614342	3702.AT4G29060.1	3702.AT1G75350.1	0.19	0	0	0	0.722	0	0	0.547	0.889
	FBA2	TLP18.3	628603	612371	3702.AT4G38970.1	3702.AT1G54780.1	0	0	0	0	0.853	0	0	0.269	0.888
	CSP41A	SBPASE	624555	623790	3702.AT3G63140.1	3702.AT3G55800.1	0	0	0	0	0.881	0	0	0.073	0.885
	HPR	CRB	613587	608726	3702.AT1G68010.2	3702.AT1G09340.1	0	0	0	0	0.885	0	0	0	0.885
	PSAN	RCA	634646	618258	3702.AT5G64040.2	3702.AT2G39730.1	0	0	0	0	0.83	0	0	0.351	0.884
	AT4G27280	STZ	627335	610593	3702.AT4G27280.1	3702.AT1G27730.1	0	0	0	0	0.862	0.101	0	0.145	0.884
	HSFA4A	WRKY33	626431	618130	3702.AT4G18880.1	3702.AT2G38470.1	0	0	0	0	0.864	0	0	0.187	0.884
	APE2	PSAL	632718	625711	3702.AT5G46110.4	3702.AT4G12800.1	0	0	0	0	0.863	0	0	0.18	0.883
	AO	PCK1	630099	628490	3702.AT5G14760.1	3702.AT4G37870.1	0.057	0	0	0	0.092	0	0.8	0.399	0.883
	PSI-P	CRB	619027	608726	3702.AT2G46820.1	3702.AT1G09340.1	0	0	0	0	0.882	0	0	0	0.882
	CSP41A	GAPA-2	624555	609120	3702.AT3G63140.1	3702.AT1G12900.1	0	0	0	0	0.882	0	0	0	0.882
	PSAL	GAPA-2	625711	609120	3702.AT4G12800.1	3702.AT1G12900.1	0	0	0	0	0.881	0	0	0.046	0.882
	CaS	SBPASE	630907	623790	3702.AT5G23060.1	3702.AT3G55800.1	0	0	0	0	0.881	0	0	0	0.881
	PSBO2	HPR	623254	613587	3702.AT3G50820.1	3702.AT1G68010.2	0	0	0	0	0.873	0	0	0.106	0.881
	AT4G01150	AT2G26500	624737	616844	3702.AT4G01150.1	3702.AT2G26500.1	0	0	0	0	0.88	0	0	0	0.88
	CSP41A	LrgB	624555	611016	3702.AT3G63140.1	3702.AT1G32080.1	0	0	0	0	0.88	0	0	0	0.88
	PETC	HPR	624981	613587	3702.AT4G03280.1	3702.AT1G68010.2	0	0	0	0	0.879	0	0	0	0.879
	FBA2	PETC	628603	624981	3702.AT4G38970.1	3702.AT4G03280.1	0	0	0	0	0.856	0.094	0	0.146	0.879
	RCA	PSAH2	618258	612091	3702.AT2G39730.1	3702.AT1G52230.1	0	0	0	0	0.767	0	0	0.502	0.879
	HCF136	TLP18.3	630913	612371	3702.AT5G23120.1	3702.AT1G54780.1	0	0	0.277	0	0.652	0	0	0.56	0.879
	MKK9	STZ	614150	610593	3702.AT1G73500.1	3702.AT1G27730.1	0	0	0	0	0.825	0.049	0	0.327	0.878
	PSBQ-2	PSI-P	625139	619027	3702.AT4G05180.1	3702.AT2G46820.1	0	0	0	0	0.741	0	0	0.551	0.878
	SULA	LQY1	616306	614373	3702.AT2G21280.1	3702.AT1G75690.1	0	0	0	0	0.877	0	0	0	0.877
	APE2	PSBO2	632718	623254	3702.AT5G46110.4	3702.AT3G50820.1	0	0	0	0	0.86	0	0	0.163	0.877
	HCF136	PSBO2	630913	623254	3702.AT5G23120.1	3702.AT3G50820.1	0	0	0.362	0	0.5	0	0	0.645	0.876
	PRXQ	emb2184	621899	614342	3702.AT3G26060.2	3702.AT1G75350.1	0	0	0	0	0.876	0	0	0	0.876
	APE2	PSBW	632718	617266	3702.AT5G46110.4	3702.AT2G30570.1	0	0	0	0	0.863	0	0	0.127	0.875
	PETC	CRB	624981	608726	3702.AT4G03280.1	3702.AT1G09340.1	0	0	0	0	0.874	0	0	0.045	0.875
	BCS1	WRKY33	623267	618130	3702.AT3G50930.1	3702.AT2G38470.1	0	0	0	0	0.863	0	0	0.123	0.874
	PSAN	LQY1	634646	614373	3702.AT5G64040.2	3702.AT1G75690.1	0	0	0	0	0.826	0	0	0.308	0.874
	PETC	PSI-P	624981	619027	3702.AT4G03280.1	3702.AT2G46820.1	0	0	0	0	0.874	0	0	0	0.874
	AT5G58330	NTRC	634048	618481	3702.AT5G58330.1	3702.AT2G41680.1	0.19	0	0	0	0.385	0.048	0	0.763	0.872
	ENH1	PSBO2	630351	623254	3702.AT5G17170.1	3702.AT3G50820.1	0	0	0	0	0.871	0	0	0	0.871
	APE2	PSBQ-2	632718	625139	3702.AT5G46110.4	3702.AT4G05180.1	0	0	0	0	0.865	0	0	0.088	0.871
	APE2	FBA2	632718	628603	3702.AT5G46110.4	3702.AT4G38970.1	0	0	0	0	0.866	0	0	0.075	0.871
	LrgB	CRB	611016	608726	3702.AT1G32080.1	3702.AT1G09340.1	0	0	0	0	0.87	0	0	0	0.87
	APE2	PSI-P	632718	619027	3702.AT5G46110.4	3702.AT2G46820.1	0	0	0	0	0.87	0	0	0	0.87
	PETC	PSAO	624981	608627	3702.AT4G03280.1	3702.AT1G08380.1	0	0	0	0	0.87	0	0	0	0.87
	PETC	DAC	624981	621007	3702.AT4G03280.1	3702.AT3G17930.1	0	0	0	0	0.296	0	0	0.824	0.87
	AT5G51190	STZ	633273	610593	3702.AT5G51190.1	3702.AT1G27730.1	0	0	0	0	0.827	0	0	0.277	0.869
	CaS	GAPA-2	630907	609120	3702.AT5G23060.1	3702.AT1G12900.1	0	0	0	0	0.869	0	0	0	0.869
	FNR2	GAPA-2	609854	609120	3702.AT1G20020.1	3702.AT1G12900.1	0	0	0	0	0.789	0.27	0	0.218	0.869
	LQY1	CRB	614373	608726	3702.AT1G75690.1	3702.AT1G09340.1	0	0	0	0	0.868	0	0	0	0.868
	PSI-P	RCA	619027	618258	3702.AT2G46820.1	3702.AT2G39730.1	0	0	0	0	0.844	0	0	0.189	0.868
	AT5G51190	AT4G27280	633273	627335	3702.AT5G51190.1	3702.AT4G27280.1	0	0	0	0	0.833	0	0	0.238	0.867
	FBA2	PSAL	628603	625711	3702.AT4G38970.1	3702.AT4G12800.1	0	0	0	0	0.862	0	0	0.072	0.867
	AT5G58330	CaS	634048	630907	3702.AT5G58330.1	3702.AT5G23060.1	0	0	0	0	0.867	0	0	0	0.867
	SHM1	CSP41A	628497	624555	3702.AT4G37930.1	3702.AT3G63140.1	0	0	0	0	0.863	0	0	0.071	0.867
	CRD1	GAPA-2	623904	609120	3702.AT3G56940.1	3702.AT1G12900.1	0	0	0	0	0.788	0	0	0.401	0.867
	PSI-P	GAPA-2	619027	609120	3702.AT2G46820.1	3702.AT1G12900.1	0	0	0	0	0.866	0	0	0	0.866
	HPR	TLP18.3	613587	612371	3702.AT1G68010.2	3702.AT1G54780.1	0	0	0	0	0.866	0	0	0	0.866
	emb2726	FNR2	627535	609854	3702.AT4G29060.1	3702.AT1G20020.1	0	0	0	0	0.517	0	0	0.732	0.865
	CSP41A	PSI-P	624555	619027	3702.AT3G63140.1	3702.AT2G46820.1	0	0	0	0	0.865	0	0	0	0.865
	SBPASE	LrgB	623790	611016	3702.AT3G55800.1	3702.AT1G32080.1	0	0	0	0	0.865	0	0	0	0.865
	PSAH2	GAPA-2	612091	609120	3702.AT1G52230.1	3702.AT1G12900.1	0	0	0	0	0.864	0	0	0	0.864
	PSAN	HPR	634646	613587	3702.AT5G64040.2	3702.AT1G68010.2	0	0	0	0	0.855	0	0	0.105	0.864
	FBA2	CRD1	628603	623904	3702.AT4G38970.1	3702.AT3G56940.1	0	0	0	0	0.863	0	0	0.045	0.864
	SBPASE	AT3G47070	623790	622854	3702.AT3G55800.1	3702.AT3G47070.1	0	0	0	0	0.86	0	0	0.073	0.864
	PIN1	MP	614158	609837	3702.AT1G73590.1	3702.AT1G19850.1	0	0	0	0	0.16	0	0	0.844	0.864
	SHM1	PSI-P	628497	619027	3702.AT4G37930.1	3702.AT2G46820.1	0	0	0	0	0.863	0	0	0	0.863
	GA2	GA2OX2	614763	610812	3702.AT1G79460.1	3702.AT1G30040.1	0	0	0	0	0	0	0	0.863	0.863
	AT3G47070	CRB	622854	608726	3702.AT3G47070.1	3702.AT1G09340.1	0	0	0	0	0.863	0	0	0	0.863
	AT2G42220	PSAH2	618539	612091	3702.AT2G42220.1	3702.AT1G52230.1	0	0	0	0	0.863	0	0	0	0.863
	APE2	CRD1	632718	623904	3702.AT5G46110.4	3702.AT3G56940.1	0	0	0	0	0.863	0	0	0	0.863
	PSAN	APE2	634646	632718	3702.AT5G64040.2	3702.AT5G46110.4	0	0	0	0	0.863	0	0	0	0.863
	AT5G58330	HPR	634048	613587	3702.AT5G58330.1	3702.AT1G68010.2	0.067	0	0	0	0.724	0.047	0	0.505	0.862
	PRXQ	LQY1	621899	614373	3702.AT3G26060.2	3702.AT1G75690.1	0	0	0	0	0.817	0	0	0.272	0.861
	SHM1	GAPA-2	628497	609120	3702.AT4G37930.1	3702.AT1G12900.1	0.101	0	0	0	0.75	0	0	0.431	0.861
	APE2	SBPASE	632718	623790	3702.AT5G46110.4	3702.AT3G55800.1	0	0	0	0	0.837	0	0	0.184	0.861
	PSAN	GAPA-2	634646	609120	3702.AT5G64040.2	3702.AT1G12900.1	0	0	0	0	0.859	0	0	0	0.859
	AT5G58330	TRX-M4	634048	620727	3702.AT5G58330.1	3702.AT3G15360.1	0.054	0	0	0	0.417	0.048	0	0.764	0.859
	PRR5	PRR7	631062	628917	3702.AT5G24470.1	3702.AT5G02810.1	0	0	0	0.688	0.176	0.765	0	0.977	0.859
	PSAN	AT3G47070	634646	622854	3702.AT5G64040.2	3702.AT3G47070.1	0	0	0	0	0.852	0	0	0.08	0.858
	APE2	LHCB6	632718	609430	3702.AT5G46110.4	3702.AT1G15820.1	0	0	0	0	0.85	0	0	0.084	0.857
	CRD1	PSBO2	623904	623254	3702.AT3G56940.1	3702.AT3G50820.1	0	0	0	0	0.848	0	0	0.097	0.857
	SBPASE	PSI-P	623790	619027	3702.AT3G55800.1	3702.AT2G46820.1	0	0	0	0	0.843	0	0	0.13	0.857
	IAA13	MP	617572	609837	3702.AT2G33310.2	3702.AT1G19850.1	0	0	0	0.62	0	0.563	0.6	0.591	0.857
	PRXQ	FNR2	621899	609854	3702.AT3G26060.2	3702.AT1G20020.1	0	0	0	0	0.855	0	0	0.046	0.856
	HCF136	CRB	630913	608726	3702.AT5G23120.1	3702.AT1G09340.1	0	0	0.206	0	0.826	0	0	0	0.855
	HPR	GLYR2	613587	609619	3702.AT1G68010.2	3702.AT1G17650.1	0.14	0	0	0	0.15	0	0.8	0.125	0.855
	SHM1	TLP18.3	628497	612371	3702.AT4G37930.1	3702.AT1G54780.1	0.051	0	0	0	0.853	0	0	0	0.855
	PSAL	SBPASE	625711	623790	3702.AT4G12800.1	3702.AT3G55800.1	0	0	0	0	0.855	0	0	0	0.855
	SHM1	PETC	628497	624981	3702.AT4G37930.1	3702.AT4G03280.1	0	0	0	0	0.842	0	0	0.109	0.853
	SHM1	FNR2	628497	609854	3702.AT4G37930.1	3702.AT1G20020.1	0	0	0	0	0.835	0	0	0.141	0.853
	HPR	PSAH2	613587	612091	3702.AT1G68010.2	3702.AT1G52230.1	0	0	0	0	0.691	0	0	0.545	0.853
	CRD1	LHCB4.2	623904	620000	3702.AT3G56940.1	3702.AT3G08940.2	0	0	0	0	0.853	0	0	0	0.853
	APE2	LQY1	632718	614373	3702.AT5G46110.4	3702.AT1G75690.1	0	0	0	0	0.852	0	0	0	0.852
	AT2G42220	GAPA-2	618539	609120	3702.AT2G42220.1	3702.AT1G12900.1	0	0	0	0	0.852	0	0	0	0.852
	SBPASE	PSBO2	623790	623254	3702.AT3G55800.1	3702.AT3G50820.1	0	0	0	0	0.732	0	0	0.471	0.852
	AT3G47070	AT2G26500	622854	616844	3702.AT3G47070.1	3702.AT2G26500.1	0	0	0	0	0.85	0	0	0	0.85
	FBA2	CSP41A	628603	624555	3702.AT4G38970.1	3702.AT3G63140.1	0	0	0	0	0.694	0	0	0.53	0.85
	PETC	TLP18.3	624981	612371	3702.AT4G03280.1	3702.AT1G54780.1	0	0	0	0	0.85	0	0	0	0.85
	FBA2	PSAH2	628603	612091	3702.AT4G38970.1	3702.AT1G52230.1	0	0	0	0	0.849	0	0	0	0.849
	APE2	LHCB4.2	632718	620000	3702.AT5G46110.4	3702.AT3G08940.2	0	0	0	0	0.849	0	0	0	0.849
	ATL2	WRKY33	620875	618130	3702.AT3G16720.1	3702.AT2G38470.1	0	0	0	0	0.826	0	0	0.168	0.849
	AT4G01150	emb2184	624737	614342	3702.AT4G01150.1	3702.AT1G75350.1	0	0	0	0	0.848	0	0	0	0.848
	CRD1	PSAH2	623904	612091	3702.AT3G56940.1	3702.AT1G52230.1	0	0	0	0	0.848	0	0	0	0.848
	PSBQ-2	HPR	625139	613587	3702.AT4G05180.1	3702.AT1G68010.2	0	0	0	0	0.838	0	0	0.096	0.847
	CSP41A	HPR	624555	613587	3702.AT3G63140.1	3702.AT1G68010.2	0	0	0	0	0.847	0	0	0	0.847
	APE2	PSAH2	632718	612091	3702.AT5G46110.4	3702.AT1G52230.1	0	0	0	0	0.846	0	0	0	0.846
	SHM1	PRXQ	628497	621899	3702.AT4G37930.1	3702.AT3G26060.2	0.071	0	0	0	0.825	0	0	0.128	0.846
	AT4G01150	GAPA-2	624737	609120	3702.AT4G01150.1	3702.AT1G12900.1	0	0	0	0	0.684	0	0	0.53	0.845
	CRD1	RCA	623904	618258	3702.AT3G56940.1	3702.AT2G39730.1	0	0	0	0	0.844	0	0	0.049	0.845
	PSAN	SHM1	634646	628497	3702.AT5G64040.2	3702.AT4G37930.1	0	0	0	0	0.827	0	0	0.137	0.844
	SBPASE	HCF101	623790	621724	3702.AT3G55800.1	3702.AT3G24430.1	0.14	0	0	0	0.826	0	0	0	0.843
	PSBW	HPR	617266	613587	3702.AT2G30570.1	3702.AT1G68010.2	0	0	0	0	0.842	0	0	0	0.842
	CaS	AT2G42220	630907	618539	3702.AT5G23060.1	3702.AT2G42220.1	0	0	0	0	0.842	0	0	0	0.842
	PRXQ	PSI-P	621899	619027	3702.AT3G26060.2	3702.AT2G46820.1	0	0	0	0	0.841	0	0	0	0.841
	AT5G16990	AT1G60000	630331	612742	3702.AT5G16990.1	3702.AT1G60000.1	0	0	0	0	0.073	0	0	0.836	0.841
	PSBQ-2	CRD1	625139	623904	3702.AT4G05180.1	3702.AT3G56940.1	0	0	0	0	0.834	0	0	0.081	0.841
	PSBQ-2	AT2G42220	625139	618539	3702.AT4G05180.1	3702.AT2G42220.1	0	0	0	0	0.841	0	0	0	0.841
	AT5G52970	PRXQ	633461	621899	3702.AT5G52970.1	3702.AT3G26060.2	0	0	0	0	0.841	0	0	0	0.841
	PRXQ	AT2G37660	621899	618044	3702.AT3G26060.2	3702.AT2G37660.1	0.058	0	0	0	0.838	0	0	0	0.841
	AT2G26500	HPR	616844	613587	3702.AT2G26500.1	3702.AT1G68010.2	0	0	0	0	0.84	0	0	0	0.84
	ERF-1	STZ	626271	610593	3702.AT4G17500.1	3702.AT1G27730.1	0	0	0	0	0.827	0	0	0.108	0.84
	PSAH2	CRB	612091	608726	3702.AT1G52230.1	3702.AT1G09340.1	0	0	0	0	0.84	0	0	0	0.84
	CaS	HPR	630907	613587	3702.AT5G23060.1	3702.AT1G68010.2	0	0	0	0	0.84	0	0	0	0.84
	TL29	PRXQ	625316	621899	3702.AT4G09010.1	3702.AT3G26060.2	0	0	0	0	0.692	0	0	0.503	0.84
	PSBO2	FNR2	623254	609854	3702.AT3G50820.1	3702.AT1G20020.1	0	0	0	0	0.693	0	0	0.499	0.84
	AT4G01150	AT3G47070	624737	622854	3702.AT4G01150.1	3702.AT3G47070.1	0	0	0	0	0.839	0	0	0	0.839
	LQY1	HPR	614373	613587	3702.AT1G75690.1	3702.AT1G68010.2	0	0	0	0	0.839	0	0	0	0.839
	CRD1	HPR	623904	613587	3702.AT3G56940.1	3702.AT1G68010.2	0	0	0	0	0.839	0	0	0	0.839
	STZ	AT1G23710	610593	610241	3702.AT1G27730.1	3702.AT1G23710.1	0	0	0	0	0.838	0	0	0	0.838
	PETC	PSBW	624981	617266	3702.AT4G03280.1	3702.AT2G30570.1	0	0	0	0	0.774	0	0	0.311	0.838
	PSBQ-2	AT4G01150	625139	624737	3702.AT4G05180.1	3702.AT4G01150.1	0	0	0	0	0.761	0	0	0.348	0.837
	AT2G37660	emb2184	618044	614342	3702.AT2G37660.1	3702.AT1G75350.1	0.105	0	0	0	0.826	0	0	0	0.837
	AT3G47650	emb2184	622907	614342	3702.AT3G47650.1	3702.AT1G75350.1	0	0	0	0	0.837	0	0	0	0.837
	LQY1	PSAH2	614373	612091	3702.AT1G75690.1	3702.AT1G52230.1	0	0	0	0	0.826	0	0	0.097	0.836
	AT3G47070	GAPA-2	622854	609120	3702.AT3G47070.1	3702.AT1G12900.1	0	0	0	0	0.835	0	0	0	0.835
	ENH1	AT3G47070	630351	622854	3702.AT5G17170.1	3702.AT3G47070.1	0	0	0	0	0.835	0	0	0	0.835
	SBPASE	LQY1	623790	614373	3702.AT3G55800.1	3702.AT1G75690.1	0	0	0	0	0.835	0	0	0	0.835
	PSAL	HPR	625711	613587	3702.AT4G12800.1	3702.AT1G68010.2	0	0	0	0	0.829	0	0	0.069	0.834
	FBA2	SHM1	628603	628497	3702.AT4G38970.1	3702.AT4G37930.1	0	0	0	0	0.829	0	0	0.072	0.834
	APE2	AT1G04420	632718	608196	3702.AT5G46110.4	3702.AT1G04420.1	0	0	0	0	0.833	0	0	0	0.833
	AT2G42220	LQY1	618539	614373	3702.AT2G42220.1	3702.AT1G75690.1	0	0	0	0	0.833	0	0	0	0.833
	SBPASE	PSAH2	623790	612091	3702.AT3G55800.1	3702.AT1G52230.1	0	0	0	0	0.827	0	0	0.072	0.833
	FBA2	PSI-P	628603	619027	3702.AT4G38970.1	3702.AT2G46820.1	0	0	0	0	0.832	0	0	0	0.832
	HPR	PSAO	613587	608627	3702.AT1G68010.2	3702.AT1G08380.1	0	0	0	0	0.832	0	0	0	0.832
	HCF136	LQY1	630913	614373	3702.AT5G23120.1	3702.AT1G75690.1	0	0	0	0	0.659	0	0	0.529	0.832
	HCF136	FNR2	630913	609854	3702.AT5G23120.1	3702.AT1G20020.1	0	0	0	0	0.63	0	0	0.563	0.831
	PRXQ	DAC	621899	621007	3702.AT3G26060.2	3702.AT3G17930.1	0	0	0	0	0.829	0	0	0.048	0.83
	TRX1	PRXQ	623277	621899	3702.AT3G51030.1	3702.AT3G26060.2	0	0	0	0	0.048	0	0	0.828	0.829
	AT3G47070	LQY1	622854	614373	3702.AT3G47070.1	3702.AT1G75690.1	0	0	0	0	0.828	0	0	0	0.828
	ATL2	STZ	620875	610593	3702.AT3G16720.1	3702.AT1G27730.1	0	0	0	0	0.827	0.048	0	0	0.828
	PETC	AT3G47070	624981	622854	3702.AT4G03280.1	3702.AT3G47070.1	0	0	0	0	0.828	0	0	0	0.828
	AT3G47650	LHCB4.2	622907	620000	3702.AT3G47650.1	3702.AT3G08940.2	0	0	0	0	0.828	0	0	0	0.828
	AT3G47070	HPR	622854	613587	3702.AT3G47070.1	3702.AT1G68010.2	0	0	0	0	0.827	0	0	0	0.827
	PSAN	emb2184	634646	614342	3702.AT5G64040.2	3702.AT1G75350.1	0	0	0	0	0.827	0	0	0	0.827
	SHM1	AT4G01150	628497	624737	3702.AT4G37930.1	3702.AT4G01150.1	0	0	0	0	0.827	0	0	0	0.827
	ENH1	emb2726	630351	627535	3702.AT5G17170.1	3702.AT4G29060.1	0	0	0	0	0.827	0	0	0	0.827
	PSAN	AT2G42220	634646	618539	3702.AT5G64040.2	3702.AT2G42220.1	0	0	0	0	0.827	0	0	0	0.827
	LQY1	AT1G18060	614373	609659	3702.AT1G75690.1	3702.AT1G18060.1	0	0	0	0	0.826	0	0	0	0.826
	PSAN	CRB	634646	608726	3702.AT5G64040.2	3702.AT1G09340.1	0	0	0	0	0.825	0	0	0	0.825
	CaS	PSAH2	630907	612091	3702.AT5G23060.1	3702.AT1G52230.1	0	0	0	0	0.816	0	0	0.09	0.825
	AT3G47070	PSBW	622854	617266	3702.AT3G47070.1	3702.AT2G30570.1	0	0	0	0	0.824	0	0	0	0.824
	AT3G47070	PRXQ	622854	621899	3702.AT3G47070.1	3702.AT3G26060.2	0	0	0	0	0.824	0	0	0	0.824
	HCF101	CRB	621724	608726	3702.AT3G24430.1	3702.AT1G09340.1	0	0	0	0	0.824	0	0	0	0.824
	CSP41A	PSBO2	624555	623254	3702.AT3G63140.1	3702.AT3G50820.1	0	0	0.329	0	0.712	0	0	0.154	0.822
	emb2726	NTRC	627535	618481	3702.AT4G29060.1	3702.AT2G41680.1	0.062	0	0	0	0.699	0	0	0.414	0.82
	AT5G58330	PETC	634048	624981	3702.AT5G58330.1	3702.AT4G03280.1	0	0	0	0	0.585	0.132	0	0.537	0.819
	PETC	PRXQ	624981	621899	3702.AT4G03280.1	3702.AT3G26060.2	0.095	0	0	0	0.761	0	0	0.231	0.819
	AT2G42220	LHCB6	618539	609430	3702.AT2G42220.1	3702.AT1G15820.1	0	0	0	0	0.819	0	0	0	0.819
	DAC	emb2184	621007	614342	3702.AT3G17930.1	3702.AT1G75350.1	0	0	0	0	0.814	0	0	0	0.814
	ERF4	STZ	620706	610593	3702.AT3G15210.1	3702.AT1G27730.1	0	0	0	0	0.626	0	0	0.523	0.814
	DHS1	DHS2	628711	628021	3702.AT4G39980.1	3702.AT4G33510.1	0	0	0.449	0.978	0.087	0	0.8	0.819	0.814
	AT1G57770	CYP97A3	612601	610986	3702.AT1G57770.1	3702.AT1G31800.1	0.045	0	0	0	0.408	0	0	0.696	0.813
	PSBW	TLP18.3	617266	612371	3702.AT2G30570.1	3702.AT1G54780.1	0	0	0	0	0.722	0	0	0.352	0.812
	WRKY33	AT1G23710	618130	610241	3702.AT2G38470.1	3702.AT1G23710.1	0	0	0	0	0.811	0	0	0	0.811
	HCF136	emb2184	630913	614342	3702.AT5G23120.1	3702.AT1G75350.1	0	0	0	0	0.811	0	0	0	0.811
	AT3G59080	WRKY33	624123	618130	3702.AT3G59080.1	3702.AT2G38470.1	0	0	0	0	0.809	0	0	0	0.809
	CSP41A	PSAH2	624555	612091	3702.AT3G63140.1	3702.AT1G52230.1	0	0	0	0	0.809	0	0	0	0.809
	TL29	AT2G42220	625316	618539	3702.AT4G09010.1	3702.AT2G42220.1	0	0	0	0	0.808	0	0	0	0.808
	AT1G57770	AT1G12250	612601	609050	3702.AT1G57770.1	3702.AT1G12250.1	0.058	0	0	0	0.801	0	0	0	0.805
	AT2G31040	AT1G35420	617320	611307	3702.AT2G31040.1	3702.AT1G35420.2	0	0	0	0	0.803	0	0	0	0.803
	ERD7	LEA14	615934	607891	3702.AT2G17840.1	3702.AT1G01470.1	0	0	0	0	0.74	0	0	0.271	0.802
	PETC	LHCB6	624981	609430	3702.AT4G03280.1	3702.AT1G15820.1	0	0	0	0	0.686	0	0	0.392	0.801
	CSLA02	CSLD5	630870	608023	3702.AT5G22740.1	3702.AT1G02730.1	0	0	0	0	0.1	0	0	0.787	0.8
	CSP41A	RCA	624555	618258	3702.AT3G63140.1	3702.AT2G39730.1	0	0	0	0	0.684	0	0	0.386	0.797
	AT5G58330	RCA	634048	618258	3702.AT5G58330.1	3702.AT2G39730.1	0	0	0	0	0.578	0	0	0.536	0.796
	RCA	FNR2	618258	609854	3702.AT2G39730.1	3702.AT1G20020.1	0	0	0	0	0.63	0	0	0.471	0.796
	AT5G58330	AT3G47650	634048	622907	3702.AT5G58330.1	3702.AT3G47650.1	0	0	0	0	0.795	0	0	0	0.795
	TL29	LHCB6	625316	609430	3702.AT4G09010.1	3702.AT1G15820.1	0	0	0	0	0.672	0	0	0.398	0.794
	emb2726	APG3	627535	624529	3702.AT4G29060.1	3702.AT3G62910.1	0.19	0	0	0	0.66	0	0	0.309	0.793
	CaS	LQY1	630907	614373	3702.AT5G23060.1	3702.AT1G75690.1	0	0	0	0	0.792	0	0	0	0.792
	HCF136	CSP41A	630913	624555	3702.AT5G23120.1	3702.AT3G63140.1	0	0	0.352	0	0.688	0	0	0	0.789
	AT2G41640	AT1G23710	618477	610241	3702.AT2G41640.1	3702.AT1G23710.1	0	0	0	0	0.788	0	0	0	0.788
	ANT	CYCD3;1	628478	628093	3702.AT4G37750.1	3702.AT4G34160.1	0	0	0	0	0.401	0	0	0.662	0.788
	TL29	FNR2	625316	609854	3702.AT4G09010.1	3702.AT1G20020.1	0	0	0	0	0.697	0	0	0.327	0.787
	FOLB2	NUDX1	634533	613668	3702.AT5G62980.1	3702.AT1G68760.1	0.19	0	0	0	0	0	0	0.748	0.787
	PETC	LQY1	624981	614373	3702.AT4G03280.1	3702.AT1G75690.1	0	0	0	0	0.786	0	0	0	0.786
	ENH1	DAC	630351	621007	3702.AT5G17170.1	3702.AT3G17930.1	0	0	0	0	0.786	0	0	0	0.786
	emb2726	PETC	627535	624981	3702.AT4G29060.1	3702.AT4G03280.1	0.14	0	0	0	0.474	0	0	0.563	0.785
	PSAL	CRB	625711	608726	3702.AT4G12800.1	3702.AT1G09340.1	0	0	0	0	0.783	0	0	0	0.783
	CRD1	CRB	623904	608726	3702.AT3G56940.1	3702.AT1G09340.1	0	0	0	0	0.734	0	0	0.216	0.783
	MYB15	STZ	621596	610593	3702.AT3G23250.1	3702.AT1G27730.1	0	0	0	0	0.468	0.074	0	0.594	0.782
	HCF136	PSI-P	630913	619027	3702.AT5G23120.1	3702.AT2G46820.1	0	0	0	0	0.739	0	0	0.188	0.779
	PSAL	CSP41A	625711	624555	3702.AT4G12800.1	3702.AT3G63140.1	0	0	0.306	0	0.695	0	0	0	0.779
	AT3G47650	PRXQ	622907	621899	3702.AT3G47650.1	3702.AT3G26060.2	0	0	0	0	0.778	0	0	0	0.778
	AT4G01150	PSAH2	624737	612091	3702.AT4G01150.1	3702.AT1G52230.1	0	0	0	0	0.775	0	0	0	0.775
	PSBQ-2	SBPASE	625139	623790	3702.AT4G05180.1	3702.AT3G55800.1	0	0	0	0	0.682	0	0	0.321	0.775
	TL29	CSP41A	625316	624555	3702.AT4G09010.1	3702.AT3G63140.1	0	0	0	0	0.775	0	0	0	0.775
	PSAL	AT4G01150	625711	624737	3702.AT4G12800.1	3702.AT4G01150.1	0	0	0.228	0	0.682	0	0	0.154	0.774
	PSBQ-2	AT2G26500	625139	616844	3702.AT4G05180.1	3702.AT2G26500.1	0	0	0	0	0.773	0	0	0	0.773
	BLH1	OFP7	617855	616005	3702.AT2G35940.3	3702.AT2G18500.1	0	0	0	0	0	0	0	0.773	0.773
	ENH1	SBPASE	630351	623790	3702.AT5G17170.1	3702.AT3G55800.1	0	0	0	0	0.772	0	0	0	0.772
	PRXQ	AT1G56500	621899	612554	3702.AT3G26060.2	3702.AT1G56500.1	0.19	0	0	0	0.559	0	0	0.41	0.771
	AT5G16990	AT4G35730	630331	628263	3702.AT5G16990.1	3702.AT4G35730.1	0	0	0	0	0	0	0	0.77	0.77
	PDX2	AT5G13810	634277	630000	3702.AT5G60540.1	3702.AT5G13810.1	0	0	0	0	0	0	0	0.77	0.77
	SAL1	SOT17	634640	609710	3702.AT5G63980.1	3702.AT1G18590.1	0	0	0	0	0.5	0	0	0.56	0.77
	LHCB4.2	AT2G42220	620000	618539	3702.AT3G08940.2	3702.AT2G42220.1	0	0	0	0	0.77	0	0	0	0.77
	GSTF11	SOT17	619411	609710	3702.AT3G03190.1	3702.AT1G18590.1	0	0	0	0	0.49	0	0	0.567	0.769
	AT5G58330	FNR2	634048	609854	3702.AT5G58330.1	3702.AT1G20020.1	0	0	0	0	0.589	0.042	0	0.461	0.769
	HCF136	HCF101	630913	621724	3702.AT5G23120.1	3702.AT3G24430.1	0	0	0	0	0.502	0	0	0.555	0.769
	HCF136	RCA	630913	618258	3702.AT5G23120.1	3702.AT2G39730.1	0	0	0	0	0.489	0	0	0.567	0.769
	AT3G47070	PSAH2	622854	612091	3702.AT3G47070.1	3702.AT1G52230.1	0	0	0	0	0.743	0	0	0.138	0.769
	CaS	LHCB6	630907	609430	3702.AT5G23060.1	3702.AT1G15820.1	0	0	0	0	0.701	0	0	0.254	0.767
	GPDHC1	NUDX1	618469	613668	3702.AT2G41540.2	3702.AT1G68760.1	0.19	0	0	0	0	0	0	0.724	0.767
	LHCB4.2	CRB	620000	608726	3702.AT3G08940.2	3702.AT1G09340.1	0	0	0	0	0.767	0	0	0	0.767
	AT2G26500	emb2184	616844	614342	3702.AT2G26500.1	3702.AT1G75350.1	0	0	0	0	0.767	0	0	0	0.767
	AT3G47070	TLP18.3	622854	612371	3702.AT3G47070.1	3702.AT1G54780.1	0	0	0	0	0.766	0	0	0	0.766
	AT3G62260	SVR1	624462	618197	3702.AT3G62260.2	3702.AT2G39140.1	0	0	0	0	0	0	0	0.766	0.766
	PSAL	CRD1	625711	623904	3702.AT4G12800.1	3702.AT3G56940.1	0	0	0.214	0	0.711	0	0	0.047	0.764
	ERF-1	WRKY33	626271	618130	3702.AT4G17500.1	3702.AT2G38470.1	0	0	0	0	0.745	0	0	0.109	0.763
	ENH1	HPR	630351	613587	3702.AT5G17170.1	3702.AT1G68010.2	0	0	0	0	0.763	0	0	0	0.763
	FBA2	PSBQ-2	628603	625139	3702.AT4G38970.1	3702.AT4G05180.1	0	0	0	0	0.741	0	0	0.126	0.763
	HCF101	AT1G56500	621724	612554	3702.AT3G24430.1	3702.AT1G56500.1	0	0	0	0	0.662	0	0	0.327	0.762
	CSP41A	HCF101	624555	621724	3702.AT3G63140.1	3702.AT3G24430.1	0	0	0	0	0.739	0	0	0.128	0.762
	PSBO2	AT2G26500	623254	616844	3702.AT3G50820.1	3702.AT2G26500.1	0	0	0	0	0.762	0	0	0	0.762
	AT4G01150	LQY1	624737	614373	3702.AT4G01150.1	3702.AT1G75690.1	0	0	0	0	0.761	0	0	0	0.761
	AT4G01150	PSBO2	624737	623254	3702.AT4G01150.1	3702.AT3G50820.1	0	0	0.229	0	0.701	0	0	0.049	0.761
	LOX2	LCAT3	622651	619425	3702.AT3G45140.1	3702.AT3G03310.1	0	0	0	0	0	0	0.65	0.342	0.759
	PSBQ-2	FNR2	625139	609854	3702.AT4G05180.1	3702.AT1G20020.1	0	0	0	0	0.656	0	0	0.328	0.759
	GAPA-2	AT1G12250	609120	609050	3702.AT1G12900.1	3702.AT1G12250.1	0.059	0	0	0	0.499	0	0	0.529	0.758
	AT1G12250	CRB	609050	608726	3702.AT1G12250.1	3702.AT1G09340.1	0	0	0	0	0.589	0	0	0.436	0.758
	LQY1	AT1G56500	614373	612554	3702.AT1G75690.1	3702.AT1G56500.1	0	0	0	0	0.465	0	0	0.567	0.758
	GDH1	At4g39640	630457	628668	3702.AT5G18170.1	3702.AT4G39640.1	0	0	0	0	0	0	0.6	0.418	0.757
	APE2	CaS	632718	630907	3702.AT5G46110.4	3702.AT5G23060.1	0	0	0	0	0.726	0	0	0.148	0.756
	RGL1	SCL3	613410	611904	3702.AT1G66350.1	3702.AT1G50420.1	0	0	0	0.794	0	0.715	0	0.714	0.756
	PETC	HCF101	624981	621724	3702.AT4G03280.1	3702.AT3G24430.1	0.058	0	0	0	0.451	0	0	0.564	0.755
	ISA1	APL2	618283	610587	3702.AT2G39930.1	3702.AT1G27680.1	0.088	0	0.289	0	0.056	0	0	0.645	0.754
	IAA27	MP	627537	609837	3702.AT4G29080.1	3702.AT1G19850.1	0	0	0	0.583	0	0.299	0.6	0.392	0.752
	PSI-P	emb2184	619027	614342	3702.AT2G46820.1	3702.AT1G75350.1	0	0	0	0	0.751	0	0	0	0.751
	AT5G58330	GAPA-2	634048	609120	3702.AT5G58330.1	3702.AT1G12900.1	0.099	0	0	0	0.592	0.047	0	0.372	0.75
	SHM1	PSBW	628497	617266	3702.AT4G37930.1	3702.AT2G30570.1	0	0	0	0	0.739	0	0	0.079	0.749
	AT2G42220	CRB	618539	608726	3702.AT2G42220.1	3702.AT1G09340.1	0	0	0	0	0.748	0	0	0	0.748
	AT4G27280	WRKY33	627335	618130	3702.AT4G27280.1	3702.AT2G38470.1	0	0	0	0	0.747	0	0	0	0.747
	PSAN	AT4G01150	634646	624737	3702.AT5G64040.2	3702.AT4G01150.1	0	0	0	0	0.747	0	0	0	0.747
	ERF-1	MKK9	626271	614150	3702.AT4G17500.1	3702.AT1G73500.1	0	0	0	0	0.744	0	0	0	0.744
	GSL12	XTH9	629920	624974	3702.AT5G13000.1	3702.AT4G03210.1	0	0	0	0	0.068	0.081	0	0.724	0.744
	PETC	CRD1	624981	623904	3702.AT4G03280.1	3702.AT3G56940.1	0	0	0	0	0.744	0	0	0	0.744
	AT1G51110	FNR2	611974	609854	3702.AT1G51110.1	3702.AT1G20020.1	0	0	0	0	0.743	0	0	0	0.743
	emb2726	RDR1	627535	609324	3702.AT4G29060.1	3702.AT1G14790.1	0	0	0	0	0	0	0	0.742	0.742
	AT5G52970	emb2184	633461	614342	3702.AT5G52970.1	3702.AT1G75350.1	0	0	0.216	0	0.685	0	0	0	0.742
	BCS1	STZ	623267	610593	3702.AT3G50930.1	3702.AT1G27730.1	0	0	0	0	0.715	0.049	0	0.127	0.742
	AT1G18060	CRB	609659	608726	3702.AT1G18060.1	3702.AT1G09340.1	0	0	0	0	0.742	0	0	0	0.742
	AT3G47650	AT3G47070	622907	622854	3702.AT3G47650.1	3702.AT3G47070.1	0	0	0	0	0.741	0	0	0	0.741
	PETC	AT4G01150	624981	624737	3702.AT4G03280.1	3702.AT4G01150.1	0	0	0	0	0.741	0	0	0	0.741
	PETC	TRX-M4	624981	620727	3702.AT4G03280.1	3702.AT3G15360.1	0.043	0	0	0	0.684	0	0	0.213	0.741
	HCF136	HPR	630913	613587	3702.AT5G23120.1	3702.AT1G68010.2	0	0	0	0	0.738	0	0	0.048	0.74
	CaS	AT3G47070	630907	622854	3702.AT5G23060.1	3702.AT3G47070.1	0	0	0	0	0.74	0	0	0	0.74
	CaS	PSBO2	630907	623254	3702.AT5G23060.1	3702.AT3G50820.1	0	0	0	0	0.684	0	0	0.211	0.74
	MOL1	WOX4	633288	611574	3702.AT5G51350.1	3702.AT1G46480.1	0	0	0	0	0	0	0	0.739	0.739
	PSBO2	PRXQ	623254	621899	3702.AT3G50820.1	3702.AT3G26060.2	0	0	0	0	0.688	0	0	0.198	0.739
	SBPASE	AT1G56500	623790	612554	3702.AT3G55800.1	3702.AT1G56500.1	0.174	0	0	0	0.672	0.078	0	0.079	0.739
	APE2	AT4G01150	632718	624737	3702.AT5G46110.4	3702.AT4G01150.1	0	0	0	0	0.727	0	0	0.082	0.738
	NTRC	GAPA-2	618481	609120	3702.AT2G41680.1	3702.AT1G12900.1	0.19	0	0	0	0.411	0.079	0	0.473	0.737
	PRXQ	PSBW	621899	617266	3702.AT3G26060.2	3702.AT2G30570.1	0	0	0	0	0.51	0	0	0.483	0.736
	TLP18.3	FNR2	612371	609854	3702.AT1G54780.1	3702.AT1G20020.1	0	0	0	0	0.735	0	0	0	0.735
	CT-BMY	HGL1	626232	621639	3702.AT4G17090.1	3702.AT3G23640.2	0	0	0	0	0	0	0	0.734	0.734
	PME44	AT3G53190	627989	623508	3702.AT4G33220.1	3702.AT3G53190.1	0.043	0	0.231	0	0	0	0.65	0.09	0.734
	APE2	CRB	632718	608726	3702.AT5G46110.4	3702.AT1G09340.1	0	0	0	0	0.734	0	0	0	0.734
	AT5G58330	LHCB4.2	634048	620000	3702.AT5G58330.1	3702.AT3G08940.2	0	0	0	0	0.733	0	0	0	0.733
	TL29	TLP18.3	625316	612371	3702.AT4G09010.1	3702.AT1G54780.1	0	0	0	0	0.722	0	0	0.071	0.731
	NTRC	emb2184	618481	614342	3702.AT2G41680.1	3702.AT1G75350.1	0.19	0	0	0	0.389	0	0	0.498	0.73
	PRXQ	LrgB	621899	611016	3702.AT3G26060.2	3702.AT1G32080.1	0	0	0	0	0.73	0	0	0	0.73
	SHM1	emb2184	628497	614342	3702.AT4G37930.1	3702.AT1G75350.1	0.19	0	0	0	0.512	0	0	0.371	0.729
	TL29	PSAH2	625316	612091	3702.AT4G09010.1	3702.AT1G52230.1	0	0	0	0	0.686	0	0	0.169	0.728
	CT-BMY	APL2	626232	610587	3702.AT4G17090.1	3702.AT1G27680.1	0	0	0	0	0	0	0	0.728	0.728
	HCF101	AT1G14270	621724	609262	3702.AT3G24430.1	3702.AT1G14270.1	0.179	0	0	0	0.682	0	0	0	0.727
	FBA2	AT2G26500	628603	616844	3702.AT4G38970.1	3702.AT2G26500.1	0	0	0	0	0.727	0	0	0	0.727
	FNR2	PSAO	609854	608627	3702.AT1G20020.1	3702.AT1G08380.1	0	0	0	0	0.564	0	0	0.394	0.725
	SHM1	PSBQ-2	628497	625139	3702.AT4G37930.1	3702.AT4G05180.1	0	0	0	0	0.689	0	0	0.15	0.724
	SBPASE	AT2G42220	623790	618539	3702.AT3G55800.1	3702.AT2G42220.1	0	0	0	0	0.724	0	0	0	0.724
	TL29	CRB	625316	608726	3702.AT4G09010.1	3702.AT1G09340.1	0	0	0	0	0.723	0	0	0.041	0.723
	LHCB4.2	LQY1	620000	614373	3702.AT3G08940.2	3702.AT1G75690.1	0	0	0	0	0.723	0	0	0	0.723
	AT2G42220	TLP18.3	618539	612371	3702.AT2G42220.1	3702.AT1G54780.1	0	0	0	0	0.723	0	0	0	0.723
	SHM1	PSBO2	628497	623254	3702.AT4G37930.1	3702.AT3G50820.1	0	0	0	0	0.684	0	0	0.161	0.723
	AT3G53190	PMEPCRA	623508	608972	3702.AT3G53190.1	3702.AT1G11580.1	0.043	0	0.229	0	0	0	0.65	0.05	0.721
	WRKY33	MKK9	618130	614150	3702.AT2G38470.1	3702.AT1G73500.1	0	0	0	0	0.443	0	0	0.521	0.721
	RBOHD	WRKY33	632911	618130	3702.AT5G47910.1	3702.AT2G38470.1	0	0	0	0	0.499	0	0	0.466	0.721
	NTRC	APL2	618481	610587	3702.AT2G41680.1	3702.AT1G27680.1	0.187	0	0	0	0.049	0.044	0	0.667	0.721
	CaS	FBA2	630907	628603	3702.AT5G23060.1	3702.AT4G38970.1	0	0	0	0	0.72	0	0	0	0.72
	TRX-M4	PSI-P	620727	619027	3702.AT3G15360.1	3702.AT2G46820.1	0	0	0	0	0.684	0	0	0.151	0.72
	HCF136	PRXQ	630913	621899	3702.AT5G23120.1	3702.AT3G26060.2	0	0	0	0	0.634	0	0	0.266	0.719
	SHM1	PSAH2	628497	612091	3702.AT4G37930.1	3702.AT1G52230.1	0	0	0	0	0.717	0	0	0.047	0.719
	WRKY33	LOX4	618130	614050	3702.AT2G38470.1	3702.AT1G72520.1	0	0	0	0	0.499	0	0	0.462	0.718
	LCAT3	LOX4	619425	614050	3702.AT3G03310.1	3702.AT1G72520.1	0	0	0	0	0	0	0.65	0.228	0.718
	emb2184	GAPA-2	614342	609120	3702.AT1G75350.1	3702.AT1G12900.1	0.19	0	0	0	0.665	0	0	0	0.717
	NRT1.7	NLA	613787	608037	3702.AT1G69870.1	3702.AT1G02860.1	0	0	0	0	0	0	0	0.716	0.716
	PSBQ-2	LQY1	625139	614373	3702.AT4G05180.1	3702.AT1G75690.1	0	0	0	0	0.714	0	0	0.047	0.716
	TL29	LQY1	625316	614373	3702.AT4G09010.1	3702.AT1G75690.1	0	0	0	0	0.706	0	0	0.072	0.716
	AT4G33070	ERF71	627974	619098	3702.AT4G33070.1	3702.AT2G47520.1	0	0	0	0	0.274	0	0	0.624	0.715
	CaS	PSI-P	630907	619027	3702.AT5G23060.1	3702.AT2G46820.1	0	0	0	0	0.713	0	0	0.049	0.715
	LQY1	PSAO	614373	608627	3702.AT1G75690.1	3702.AT1G08380.1	0	0	0	0	0.714	0	0	0	0.714
	AT5G52970	AT2G37660	633461	618044	3702.AT5G52970.1	3702.AT2G37660.1	0	0	0	0	0.713	0	0	0	0.713
	SVP	OFP7	616433	616005	3702.AT2G22540.1	3702.AT2G18500.1	0	0	0	0	0	0	0	0.713	0.713
	PTAC5	LQY1	625808	614373	3702.AT4G13670.1	3702.AT1G75690.1	0	0	0	0	0.416	0	0	0.527	0.712
	RCA	LQY1	618258	614373	3702.AT2G39730.1	3702.AT1G75690.1	0	0	0	0	0.712	0	0	0	0.712
	LrgB	GAPA-2	611016	609120	3702.AT1G32080.1	3702.AT1G12900.1	0.114	0	0	0	0.689	0	0	0	0.712
	PSAL	FNR2	625711	609854	3702.AT4G12800.1	3702.AT1G20020.1	0	0	0	0	0.709	0	0	0.05	0.711
	LQY1	LHCB6	614373	609430	3702.AT1G75690.1	3702.AT1G15820.1	0	0	0	0	0.709	0	0	0.048	0.711
	RCA	AT2G26500	618258	616844	3702.AT2G39730.1	3702.AT2G26500.1	0	0	0	0	0.706	0	0	0.056	0.71
	TL29	GAPA-2	625316	609120	3702.AT4G09010.1	3702.AT1G12900.1	0	0	0	0	0.71	0	0	0	0.71
	AT3G47070	PSAO	622854	608627	3702.AT3G47070.1	3702.AT1G08380.1	0	0	0	0	0.709	0	0	0	0.709
	emb2184	CRB	614342	608726	3702.AT1G75350.1	3702.AT1G09340.1	0	0	0	0	0.708	0	0	0	0.708
	CaS	PRXQ	630907	621899	3702.AT5G23060.1	3702.AT3G26060.2	0	0	0	0	0.674	0	0	0.142	0.708
	MYB15	LEA14	621596	607891	3702.AT3G23250.1	3702.AT1G01470.1	0	0	0	0	0.056	0	0	0.702	0.707
	AT1G56500	LHCB6	612554	609430	3702.AT1G56500.1	3702.AT1G15820.1	0	0	0	0	0.404	0	0	0.529	0.707
	PETC	AT2G37660	624981	618044	3702.AT4G03280.1	3702.AT2G37660.1	0	0	0	0	0.574	0.32	0	0.071	0.707
	PRXQ	HCF101	621899	621724	3702.AT3G26060.2	3702.AT3G24430.1	0	0	0	0	0.685	0	0	0.11	0.707
	PSBQ-2	CRB	625139	608726	3702.AT4G05180.1	3702.AT1G09340.1	0	0	0	0	0.706	0	0	0	0.706
	CRD1	PSI-P	623904	619027	3702.AT3G56940.1	3702.AT2G46820.1	0	0	0	0	0.7	0	0	0.058	0.705
	CRD1	AT2G26500	623904	616844	3702.AT3G56940.1	3702.AT2G26500.1	0	0	0	0	0.705	0	0	0	0.705
	CaS	PSBQ-2	630907	625139	3702.AT5G23060.1	3702.AT4G05180.1	0	0	0	0	0.684	0	0	0.104	0.705
	CRD1	PSAO	623904	608627	3702.AT3G56940.1	3702.AT1G08380.1	0	0	0	0	0.705	0	0	0	0.705
	LHCB6	CRB	609430	608726	3702.AT1G15820.1	3702.AT1G09340.1	0	0	0	0	0.705	0	0	0	0.705
	PSAH2	FNR2	612091	609854	3702.AT1G52230.1	3702.AT1G20020.1	0	0	0	0	0.689	0	0	0.09	0.705
	FBA2	PSBW	628603	617266	3702.AT4G38970.1	3702.AT2G30570.1	0	0	0	0	0.634	0	0	0.223	0.704
	PSAN	FBA2	634646	628603	3702.AT5G64040.2	3702.AT4G38970.1	0	0	0	0	0.685	0	0	0.1	0.704
	AT4G01150	CRB	624737	608726	3702.AT4G01150.1	3702.AT1G09340.1	0	0	0	0	0.703	0	0	0	0.703
	EMB2820	AT4G33070	631084	627974	3702.AT5G24670.2	3702.AT4G33070.1	0	0	0	0	0	0.562	0	0.351	0.703
	PRXQ	HPR	621899	613587	3702.AT3G26060.2	3702.AT1G68010.2	0	0	0	0	0.683	0	0	0.097	0.701
	AT4G01150	PRXQ	624737	621899	3702.AT4G01150.1	3702.AT3G26060.2	0	0	0	0	0.701	0	0	0	0.701
	PSBW	emb2184	617266	614342	3702.AT2G30570.1	3702.AT1G75350.1	0	0	0	0	0.701	0	0	0	0.701
	SHM1	LQY1	628497	614373	3702.AT4G37930.1	3702.AT1G75690.1	0	0	0	0	0.7	0	0	0	0.7
	WRKY48	MYB15	633090	621596	3702.AT5G49520.1	3702.AT3G23250.1	0	0	0	0	0.606	0	0	0.272	0.7
	HCF136	AT1G12250	630913	609050	3702.AT5G23120.1	3702.AT1G12250.1	0	0	0	0	0.682	0	0	0.094	0.699
	CSP41A	AT1G51110	624555	611974	3702.AT3G63140.1	3702.AT1G51110.1	0	0	0	0	0.699	0	0	0	0.699
	PSI-P	AT2G42220	619027	618539	3702.AT2G46820.1	3702.AT2G42220.1	0	0	0	0	0.698	0	0	0	0.698
	AT2G41640	WRKY33	618477	618130	3702.AT2G41640.1	3702.AT2G38470.1	0	0	0	0	0.696	0	0	0	0.696
	PSBQ-2	TRX-M4	625139	620727	3702.AT4G05180.1	3702.AT3G15360.1	0	0	0	0	0.636	0	0	0.201	0.696
	PBRP	OFP7	628358	616005	3702.AT4G36650.1	3702.AT2G18500.1	0	0	0	0	0	0	0	0.695	0.695
	TL29	PSBW	625316	617266	3702.AT4G09010.1	3702.AT2G30570.1	0	0	0	0	0.433	0	0	0.483	0.694
	SBPASE	LHCB6	623790	609430	3702.AT3G55800.1	3702.AT1G15820.1	0	0	0	0	0.599	0	0	0.269	0.694
	AT4G03230	AT1G78780	624976	614692	3702.AT4G03230.1	3702.AT1G78780.2	0	0	0	0	0	0	0	0.694	0.694
	AT4G01150	SBPASE	624737	623790	3702.AT4G01150.1	3702.AT3G55800.1	0	0	0	0	0.686	0	0	0.06	0.692
	AT1G12250	AT1G01970	609050	607941	3702.AT1G12250.1	3702.AT1G01970.1	0	0	0	0	0.17	0	0	0.645	0.692
	AT2G26500	PSAH2	616844	612091	3702.AT2G26500.1	3702.AT1G52230.1	0	0	0	0	0.692	0	0	0	0.692
	PETC	CSP41A	624981	624555	3702.AT4G03280.1	3702.AT3G63140.1	0	0	0	0	0.686	0	0	0.06	0.692
	PSI-P	PSBW	619027	617266	3702.AT2G46820.1	3702.AT2G30570.1	0	0	0	0	0.618	0	0	0.224	0.691
	SULTR2;1	PHO2	629663	617623	3702.AT5G10180.1	3702.AT2G33770.1	0	0	0	0	0	0.043	0	0.691	0.691
	AT1G51110	CRB	611974	608726	3702.AT1G51110.1	3702.AT1G09340.1	0	0	0	0	0.691	0	0	0	0.691
	CRD1	AT1G57770	623904	612601	3702.AT3G56940.1	3702.AT1G57770.1	0	0	0.22	0	0.418	0	0	0.372	0.69
	PSAL	LQY1	625711	614373	3702.AT4G12800.1	3702.AT1G75690.1	0	0	0	0	0.686	0	0	0.053	0.69
	HCF101	NTRC	621724	618481	3702.AT3G24430.1	3702.AT2G41680.1	0.19	0	0	0	0.615	0	0	0.087	0.69
	CSP41A	AT2G42220	624555	618539	3702.AT3G63140.1	3702.AT2G42220.1	0	0	0	0	0.689	0	0	0	0.689
	FBA2	LQY1	628603	614373	3702.AT4G38970.1	3702.AT1G75690.1	0	0	0	0	0.689	0	0	0	0.689
	LQY1	emb2184	614373	614342	3702.AT1G75690.1	3702.AT1G75350.1	0	0	0	0	0.689	0	0	0	0.689
	DAC	CRB	621007	608726	3702.AT3G17930.1	3702.AT1G09340.1	0	0	0	0	0.542	0	0	0.349	0.689
	HCF136	PSBQ-2	630913	625139	3702.AT5G23120.1	3702.AT4G05180.1	0	0	0	0	0.444	0	0	0.463	0.688
	CSP41A	AT3G47070	624555	622854	3702.AT3G63140.1	3702.AT3G47070.1	0	0	0	0	0.688	0	0	0	0.688
	SHM1	AT1G56500	628497	612554	3702.AT4G37930.1	3702.AT1G56500.1	0.1	0	0	0	0.63	0.109	0	0.072	0.687
	PRXQ	AT1G12250	621899	609050	3702.AT3G26060.2	3702.AT1G12250.1	0.058	0	0	0	0.667	0	0	0.081	0.687
	FBA2	AT3G47070	628603	622854	3702.AT4G38970.1	3702.AT3G47070.1	0	0	0	0	0.686	0	0	0	0.686
	SBPASE	AT1G51110	623790	611974	3702.AT3G55800.1	3702.AT1G51110.1	0	0	0	0	0.686	0	0	0	0.686
	AT2G37660	FNR2	618044	609854	3702.AT2G37660.1	3702.AT1G20020.1	0	0	0	0	0.684	0	0	0.046	0.686
	CaS	AT1G18060	630907	609659	3702.AT5G23060.1	3702.AT1G18060.1	0	0	0	0	0.685	0	0	0	0.685
	TRX-M4	FNR2	620727	609854	3702.AT3G15360.1	3702.AT1G20020.1	0	0	0	0	0.684	0	0	0.047	0.685
	AT1G56500	AT1G51110	612554	611974	3702.AT1G56500.1	3702.AT1G51110.1	0	0	0	0	0.685	0	0	0	0.685
	SHM1	PSAO	628497	608627	3702.AT4G37930.1	3702.AT1G08380.1	0	0	0	0	0.685	0	0	0	0.685
	AT2G41640	STZ	618477	610593	3702.AT2G41640.1	3702.AT1G27730.1	0	0	0	0	0.685	0	0	0	0.685
	PSBO2	AT2G42220	623254	618539	3702.AT3G50820.1	3702.AT2G42220.1	0	0	0	0	0.685	0	0	0	0.685
	AT5G58330	FBA2	634048	628603	3702.AT5G58330.1	3702.AT4G38970.1	0	0	0	0	0.53	0.067	0	0.339	0.685
	CaS	CSP41A	630907	624555	3702.AT5G23060.1	3702.AT3G63140.1	0	0	0	0	0.684	0	0	0	0.684
	CRD1	AT2G42220	623904	618539	3702.AT3G56940.1	3702.AT2G42220.1	0	0	0	0	0.684	0	0	0	0.684
	SHM1	AT1G51110	628497	611974	3702.AT4G37930.1	3702.AT1G51110.1	0	0	0	0	0.684	0	0	0	0.684
	HCF101	LrgB	621724	611016	3702.AT3G24430.1	3702.AT1G32080.1	0.043	0	0	0	0.684	0	0	0	0.684
	AT3G47070	emb2184	622854	614342	3702.AT3G47070.1	3702.AT1G75350.1	0	0	0	0	0.684	0	0	0	0.684
	HCF136	SHM1	630913	628497	3702.AT5G23120.1	3702.AT4G37930.1	0	0	0	0	0.684	0	0	0	0.684
	APE2	SHM1	632718	628497	3702.AT5G46110.4	3702.AT4G37930.1	0	0	0	0	0.684	0	0	0	0.684
	SBPASE	emb2184	623790	614342	3702.AT3G55800.1	3702.AT1G75350.1	0	0	0	0	0.684	0	0	0	0.684
	PETC	emb2184	624981	614342	3702.AT4G03280.1	3702.AT1G75350.1	0	0	0	0	0.684	0	0	0	0.684
	AT3G47070	TRX-M4	622854	620727	3702.AT3G47070.1	3702.AT3G15360.1	0	0	0	0	0.684	0	0	0	0.684
	APE2	AT2G42220	632718	618539	3702.AT5G46110.4	3702.AT2G42220.1	0	0	0	0	0.684	0	0	0	0.684
	SHM1	LrgB	628497	611016	3702.AT4G37930.1	3702.AT1G32080.1	0	0	0	0	0.684	0	0	0	0.684
	SHM1	AT1G18060	628497	609659	3702.AT4G37930.1	3702.AT1G18060.1	0	0	0	0	0.683	0	0	0	0.683
	TRX-M4	CRB	620727	608726	3702.AT3G15360.1	3702.AT1G09340.1	0	0	0	0	0.683	0	0	0	0.683
	AT2G31040	THIC	617320	617168	3702.AT2G31040.1	3702.AT2G29630.2	0	0	0	0	0.683	0	0	0	0.683
	AT2G31040	FNR2	617320	609854	3702.AT2G31040.1	3702.AT1G20020.1	0	0	0	0	0.683	0	0	0	0.683
	TRX-M4	TLP18.3	620727	612371	3702.AT3G15360.1	3702.AT1G54780.1	0	0	0	0	0.682	0	0	0	0.682
	PSAL	AT3G47070	625711	622854	3702.AT4G12800.1	3702.AT3G47070.1	0	0	0	0	0.682	0	0	0	0.682
	LHCB4.2	HPR	620000	613587	3702.AT3G08940.2	3702.AT1G68010.2	0	0	0	0	0.682	0	0	0	0.682
	TL29	PSBQ-2	625316	625139	3702.AT4G09010.1	3702.AT4G05180.1	0	0	0	0	0.53	0	0	0.352	0.682
	TRX-M4	emb2184	620727	614342	3702.AT3G15360.1	3702.AT1G75350.1	0	0	0	0	0.682	0	0	0	0.682
	SBPASE	AT1G18060	623790	609659	3702.AT3G55800.1	3702.AT1G18060.1	0	0	0	0	0.682	0	0	0	0.682
	AT3G18680	emb2184	621091	614342	3702.AT3G18680.1	3702.AT1G75350.1	0.19	0	0	0	0.331	0	0	0.46	0.681
	SHM1	CRD1	628497	623904	3702.AT4G37930.1	3702.AT3G56940.1	0	0	0	0	0.681	0	0	0.043	0.681
	AT5G52970	PSBO2	633461	623254	3702.AT5G52970.1	3702.AT3G50820.1	0	0	0.345	0	0.532	0	0	0	0.681
	APG3	HCF101	624529	621724	3702.AT3G62910.1	3702.AT3G24430.1	0.178	0	0	0	0.595	0	0	0.115	0.68
	CYP83B1	SOT17	627801	609710	3702.AT4G31500.1	3702.AT1G18590.1	0	0	0	0	0.252	0	0	0.591	0.68
	PSAL	TRX-M4	625711	620727	3702.AT4G12800.1	3702.AT3G15360.1	0	0	0	0	0.679	0	0	0	0.679
	CRB	PSAO	608726	608627	3702.AT1G09340.1	3702.AT1G08380.1	0	0	0	0	0.679	0	0	0	0.679
	LQY1	AT1G51110	614373	611974	3702.AT1G75690.1	3702.AT1G51110.1	0	0	0	0	0.679	0	0	0	0.679
	SHM1	HCF101	628497	621724	3702.AT4G37930.1	3702.AT3G24430.1	0.129	0	0	0	0.647	0	0	0	0.679
	PSAN	TL29	634646	625316	3702.AT5G64040.2	3702.AT4G09010.1	0	0	0	0	0.524	0	0	0.353	0.678
	HPR	CYP97A3	613587	610986	3702.AT1G68010.2	3702.AT1G31800.1	0	0	0	0	0.409	0	0	0.478	0.678
	CSP41A	DAC	624555	621007	3702.AT3G63140.1	3702.AT3G17930.1	0	0	0.212	0	0.3	0	0	0.464	0.678
	AT4G32250	AT3G05640	627882	619688	3702.AT4G32250.2	3702.AT3G05640.1	0	0	0	0	0.048	0.125	0	0.644	0.677
	At4g39640	GSTF11	628668	619411	3702.AT4G39640.1	3702.AT3G03190.1	0	0	0	0	0	0	0.65	0.11	0.675
	HPR	AT1G12250	613587	609050	3702.AT1G68010.2	3702.AT1G12250.1	0.064	0	0	0	0.666	0	0	0	0.674
	SERAT1;1	SHM1	633876	628497	3702.AT5G56760.1	3702.AT4G37930.1	0.1	0	0	0	0	0	0.6	0.169	0.674
	CCR4	STZ	632905	610593	3702.AT5G47850.1	3702.AT1G27730.1	0	0	0	0	0.179	0.081	0	0.602	0.674
	GDH1	MGD1	630457	627830	3702.AT5G18170.1	3702.AT4G31780.2	0	0	0	0	0	0	0	0.674	0.674
	AT5G58330	PSBO2	634048	623254	3702.AT5G58330.1	3702.AT3G50820.1	0	0	0	0	0.66	0	0	0.078	0.673
	emb2184	TLP18.3	614342	612371	3702.AT1G75350.1	3702.AT1G54780.1	0	0	0	0	0.672	0	0	0	0.672
	CaS	LrgB	630907	611016	3702.AT5G23060.1	3702.AT1G32080.1	0	0	0	0	0.672	0	0	0	0.672
	CSP41A	AT1G56500	624555	612554	3702.AT3G63140.1	3702.AT1G56500.1	0	0	0	0	0.672	0	0	0	0.672
	PSAN	SBPASE	634646	623790	3702.AT5G64040.2	3702.AT3G55800.1	0	0	0	0	0.669	0	0	0.047	0.671
	PETC	LHCB4.2	624981	620000	3702.AT4G03280.1	3702.AT3G08940.2	0	0	0	0	0.638	0	0	0.13	0.671
	HCF136	GAPA-2	630913	609120	3702.AT5G23120.1	3702.AT1G12900.1	0	0	0	0	0.647	0	0	0.106	0.671
	SHM1	AT2G26500	628497	616844	3702.AT4G37930.1	3702.AT2G26500.1	0	0	0	0	0.67	0	0	0	0.67
	CSP41A	TRX-M4	624555	620727	3702.AT3G63140.1	3702.AT3G15360.1	0	0	0	0	0.669	0	0	0	0.669
	APG3	CSLD5	624529	608023	3702.AT3G62910.1	3702.AT1G02730.1	0	0	0	0	0	0	0	0.669	0.669
	PSAN	TRX-M4	634646	620727	3702.AT5G64040.2	3702.AT3G15360.1	0	0	0	0	0.669	0	0	0	0.669
	AT5G52970	CSP41A	633461	624555	3702.AT5G52970.1	3702.AT3G63140.1	0	0	0.238	0	0.582	0	0	0	0.668
	PSBO2	AT3G47070	623254	622854	3702.AT3G50820.1	3702.AT3G47070.1	0	0	0	0	0.667	0	0	0	0.667
	emb2726	TLP18.3	627535	612371	3702.AT4G29060.1	3702.AT1G54780.1	0	0	0	0	0.667	0	0	0	0.667
	HPR	FNR2	613587	609854	3702.AT1G68010.2	3702.AT1G20020.1	0	0	0	0	0.664	0	0	0.049	0.667
	PSBW	LQY1	617266	614373	3702.AT2G30570.1	3702.AT1G75690.1	0	0	0	0	0.659	0	0	0.06	0.666
	AT4G01150	CSP41A	624737	624555	3702.AT4G01150.1	3702.AT3G63140.1	0	0	0.219	0	0.59	0	0	0	0.666
	PSBW	CRB	617266	608726	3702.AT2G30570.1	3702.AT1G09340.1	0	0	0	0	0.665	0	0	0	0.665
	NTRC	AT1G56500	618481	612554	3702.AT2G41680.1	3702.AT1G56500.1	0.104	0	0	0	0.382	0.124	0	0.391	0.665
	HCF136	PSAL	630913	625711	3702.AT5G23120.1	3702.AT4G12800.1	0	0	0.342	0	0.447	0	0	0.154	0.665
	emb2184	FNR2	614342	609854	3702.AT1G75350.1	3702.AT1G20020.1	0	0	0	0	0.665	0	0	0	0.665
	AT3G47070	LHCB4.2	622854	620000	3702.AT3G47070.1	3702.AT3G08940.2	0	0	0	0	0.432	0	0	0.433	0.664
	HGL1	ISA1	621639	618283	3702.AT3G23640.2	3702.AT2G39930.1	0.174	0	0	0	0.079	0	0	0.594	0.664
	AT5G21105	TL29	630770	625316	3702.AT5G21105.1	3702.AT4G09010.1	0	0	0	0	0	0	0.65	0.08	0.664
	ENH1	HCF101	630351	621724	3702.AT5G17170.1	3702.AT3G24430.1	0	0	0	0	0.395	0	0	0.466	0.663
	PRXQ	AT2G42220	621899	618539	3702.AT3G26060.2	3702.AT2G42220.1	0	0	0	0	0.663	0	0	0	0.663
	CaS	SHM1	630907	628497	3702.AT5G23060.1	3702.AT4G37930.1	0	0	0	0	0.662	0	0	0	0.662
	HCF136	AT3G47070	630913	622854	3702.AT5G23120.1	3702.AT3G47070.1	0	0	0	0	0.662	0	0	0	0.662
	PSAL	AT2G42220	625711	618539	3702.AT4G12800.1	3702.AT2G42220.1	0	0	0	0	0.662	0	0	0	0.662
	AT3G47070	LrgB	622854	611016	3702.AT3G47070.1	3702.AT1G32080.1	0	0	0	0	0.662	0	0	0	0.662
	SBPASE	PSAO	623790	608627	3702.AT3G55800.1	3702.AT1G08380.1	0	0	0	0	0.659	0	0	0.049	0.662
	TRX-M4	LQY1	620727	614373	3702.AT3G15360.1	3702.AT1G75690.1	0	0	0	0	0.661	0	0	0	0.661
	AT5G52970	AT1G04420	633461	608196	3702.AT5G52970.1	3702.AT1G04420.1	0	0	0	0	0.661	0	0	0	0.661
	PSBO2	TRX-M4	623254	620727	3702.AT3G50820.1	3702.AT3G15360.1	0	0	0	0	0.632	0	0	0.118	0.661
	PRXQ	AT1G04420	621899	608196	3702.AT3G26060.2	3702.AT1G04420.1	0	0	0	0	0.655	0	0	0.058	0.661
	FBA2	AT2G42220	628603	618539	3702.AT4G38970.1	3702.AT2G42220.1	0	0	0	0	0.661	0	0	0	0.661
	FBS1	STZ	612876	610593	3702.AT1G61340.2	3702.AT1G27730.1	0	0	0	0	0.661	0	0	0	0.661
	AT1G63100	MP	613063	609837	3702.AT1G63100.1	3702.AT1G19850.1	0	0	0	0	0.102	0	0	0.637	0.66
	TL29	SULA	625316	616306	3702.AT4G09010.1	3702.AT2G21280.1	0	0	0	0	0.66	0	0	0	0.66
	FBA2	PRXQ	628603	621899	3702.AT4G38970.1	3702.AT3G26060.2	0	0	0	0	0.659	0	0	0	0.659
	TL29	emb2184	625316	614342	3702.AT4G09010.1	3702.AT1G75350.1	0	0	0	0	0.659	0	0	0	0.659
	AT2G42220	HPR	618539	613587	3702.AT2G42220.1	3702.AT1G68010.2	0	0	0	0	0.659	0	0	0	0.659
	TLP18.3	AT1G51110	612371	611974	3702.AT1G54780.1	3702.AT1G51110.1	0	0	0	0	0.659	0	0	0	0.659
	HSFA4A	STZ	626431	610593	3702.AT4G18880.1	3702.AT1G27730.1	0	0	0	0	0.5	0.093	0	0.308	0.658
	LBD4	KNAT6	610942	610211	3702.AT1G31320.1	3702.AT1G23380.2	0	0	0	0	0	0	0	0.658	0.658
	PSI-P	AT2G26500	619027	616844	3702.AT2G46820.1	3702.AT2G26500.1	0	0	0	0	0.658	0	0	0	0.658
	AT5G58330	CRB	634048	608726	3702.AT5G58330.1	3702.AT1G09340.1	0	0	0	0	0.657	0	0	0	0.657
	SVP	KNAT6	616433	610211	3702.AT2G22540.1	3702.AT1G23380.2	0	0	0	0	0	0.11	0	0.63	0.657
	NTRC	CRB	618481	608726	3702.AT2G41680.1	3702.AT1G09340.1	0	0	0	0	0.655	0	0	0	0.655
	HCF101	FNR2	621724	609854	3702.AT3G24430.1	3702.AT1G20020.1	0	0	0	0	0.552	0.124	0	0.191	0.655
	PSAN	CaS	634646	630907	3702.AT5G64040.2	3702.AT5G23060.1	0	0	0	0	0.619	0	0	0.13	0.654
	CSP41A	AT1G18060	624555	609659	3702.AT3G63140.1	3702.AT1G18060.1	0	0	0	0	0.654	0	0	0	0.654
	AT5G52970	AT3G47650	633461	622907	3702.AT5G52970.1	3702.AT3G47650.1	0	0	0	0	0.654	0	0	0	0.654
	TL29	PSBO2	625316	623254	3702.AT4G09010.1	3702.AT3G50820.1	0	0	0	0	0.577	0	0	0.216	0.654
	APE2	HCF136	632718	630913	3702.AT5G46110.4	3702.AT5G23120.1	0	0	0	0	0.653	0	0	0	0.653
	PSBQ-2	DAC	625139	621007	3702.AT4G05180.1	3702.AT3G17930.1	0	0	0	0	0.305	0	0	0.522	0.653
	PRXQ	RCA	621899	618258	3702.AT3G26060.2	3702.AT2G39730.1	0	0	0	0	0.543	0	0	0.272	0.653
	AT4G01150	CRD1	624737	623904	3702.AT4G01150.1	3702.AT3G56940.1	0	0	0	0	0.651	0	0	0	0.651
	AT2G26500	LQY1	616844	614373	3702.AT2G26500.1	3702.AT1G75690.1	0	0	0	0	0.651	0	0	0	0.651
	REV	PIN1	634295	614158	3702.AT5G60690.1	3702.AT1G73590.1	0	0	0	0	0.118	0	0	0.62	0.651
	CSP41A	emb2184	624555	614342	3702.AT3G63140.1	3702.AT1G75350.1	0	0	0	0	0.651	0	0	0	0.651
	PSBQ-2	PRXQ	625139	621899	3702.AT4G05180.1	3702.AT3G26060.2	0	0	0	0	0.547	0	0	0.261	0.651
	AT5G51190	ATL2	633273	620875	3702.AT5G51190.1	3702.AT3G16720.1	0	0	0	0	0.649	0	0	0	0.649
	AT1G56500	CRB	612554	608726	3702.AT1G56500.1	3702.AT1G09340.1	0	0	0	0	0.649	0	0	0	0.649
	CaS	PETC	630907	624981	3702.AT5G23060.1	3702.AT4G03280.1	0	0	0	0	0.634	0	0	0.08	0.649
	APE2	CSP41A	632718	624555	3702.AT5G46110.4	3702.AT3G63140.1	0	0	0	0	0.649	0	0	0	0.649
	TLP18.3	AT1G12250	612371	609050	3702.AT1G54780.1	3702.AT1G12250.1	0.175	0	0	0	0.533	0	0	0.162	0.649
	AT5G51190	WRKY33	633273	618130	3702.AT5G51190.1	3702.AT2G38470.1	0	0	0	0	0.642	0	0	0.059	0.648
	GAPA-2	AT1G01970	609120	607941	3702.AT1G12900.1	3702.AT1G01970.1	0	0	0	0	0.214	0	0	0.571	0.648
	AT2G42220	emb2184	618539	614342	3702.AT2G42220.1	3702.AT1G75350.1	0	0	0	0	0.647	0	0	0	0.647
	CRD1	SBPASE	623904	623790	3702.AT3G56940.1	3702.AT3G55800.1	0	0	0	0	0.647	0	0	0	0.647
	AT5G52970	LQY1	633461	614373	3702.AT5G52970.1	3702.AT1G75690.1	0	0	0	0	0.646	0	0	0	0.646
	HCF136	PSBW	630913	617266	3702.AT5G23120.1	3702.AT2G30570.1	0	0	0	0	0.425	0	0	0.41	0.646
	emb2184	AT1G04420	614342	608196	3702.AT1G75350.1	3702.AT1G04420.1	0.061	0	0	0	0.638	0	0	0	0.646
	GALS3	UGE1	626571	609105	3702.AT4G20170.1	3702.AT1G12780.1	0	0	0	0	0	0	0	0.646	0.646
	PRXQ	AT1G51110	621899	611974	3702.AT3G26060.2	3702.AT1G51110.1	0	0	0	0	0.645	0	0	0	0.645
	GA2	GA2OX6	614763	607989	3702.AT1G79460.1	3702.AT1G02400.1	0	0	0	0	0	0	0	0.645	0.645
	CaS	AT1G60000	630907	612742	3702.AT5G23060.1	3702.AT1G60000.1	0	0	0	0	0.645	0	0	0	0.645
	SHM1	AT3G47070	628497	622854	3702.AT4G37930.1	3702.AT3G47070.1	0	0	0	0	0.645	0	0	0	0.645
	AT1G51110	AT1G18060	611974	609659	3702.AT1G51110.1	3702.AT1G18060.1	0	0	0	0	0.645	0	0	0	0.645
	AT2G37660	AT1G04420	618044	608196	3702.AT2G37660.1	3702.AT1G04420.1	0.065	0	0	0	0.635	0	0	0	0.644
	SBPASE	NTRC	623790	618481	3702.AT3G55800.1	3702.AT2G41680.1	0.173	0	0	0	0.44	0	0	0.293	0.644
	ANT	PHB	628478	617724	3702.AT4G37750.1	3702.AT2G34710.1	0	0	0	0	0.118	0	0	0.611	0.642
	NTRC	GLX1	618481	609003	3702.AT2G41680.1	3702.AT1G11840.6	0.177	0	0	0	0.165	0.099	0	0.49	0.642
	BCS1	MYB15	623267	621596	3702.AT3G50930.1	3702.AT3G23250.1	0	0	0	0	0.602	0	0	0.139	0.642
	AT3G47650	AT2G37660	622907	618044	3702.AT3G47650.1	3702.AT2G37660.1	0	0	0	0	0.64	0	0	0.045	0.642
	HCF136	AT1G56500	630913	612554	3702.AT5G23120.1	3702.AT1G56500.1	0	0	0	0	0.532	0	0	0.268	0.642
	ENH1	PSAH2	630351	612091	3702.AT5G17170.1	3702.AT1G52230.1	0	0	0	0	0.441	0	0	0.386	0.642
	LrgB	FNR2	611016	609854	3702.AT1G32080.1	3702.AT1G20020.1	0	0	0	0	0.641	0	0	0	0.641
	HCF101	SULA	621724	616306	3702.AT3G24430.1	3702.AT2G21280.1	0	0	0	0	0.636	0	0	0.053	0.641
	LQY1	LrgB	614373	611016	3702.AT1G75690.1	3702.AT1G32080.1	0	0	0	0	0.641	0	0	0	0.641
	PETC	LrgB	624981	611016	3702.AT4G03280.1	3702.AT1G32080.1	0.172	0	0	0	0.582	0	0	0	0.639
	PETC	NTRC	624981	618481	3702.AT4G03280.1	3702.AT2G41680.1	0.081	0	0	0	0.314	0	0	0.473	0.639
	PSAL	emb2184	625711	614342	3702.AT4G12800.1	3702.AT1G75350.1	0	0	0.291	0	0.511	0	0	0	0.638
	PSAL	PRXQ	625711	621899	3702.AT4G12800.1	3702.AT3G26060.2	0	0	0	0	0.631	0	0	0.059	0.638
	CRD1	PSBW	623904	617266	3702.AT3G56940.1	3702.AT2G30570.1	0	0	0	0	0.539	0	0	0.246	0.637
	AT2G36570	WOX4	617922	611574	3702.AT2G36570.1	3702.AT1G46480.1	0	0	0	0	0.2	0	0	0.566	0.637
	LOX4	STZ	614050	610593	3702.AT1G72520.1	3702.AT1G27730.1	0	0	0	0	0.468	0	0	0.346	0.637
	CaS	PSAL	630907	625711	3702.AT5G23060.1	3702.AT4G12800.1	0	0	0	0	0.602	0	0	0.125	0.637
	FBA2	FNR2	628603	609854	3702.AT4G38970.1	3702.AT1G20020.1	0	0	0	0	0.567	0	0	0.195	0.637
	CaS	HCF101	630907	621724	3702.AT5G23060.1	3702.AT3G24430.1	0	0	0	0	0.636	0	0	0	0.636
	TL29	PSI-P	625316	619027	3702.AT4G09010.1	3702.AT2G46820.1	0	0	0	0	0.636	0	0	0	0.636
	AT5G52970	HCF136	633461	630913	3702.AT5G52970.1	3702.AT5G23120.1	0	0	0.267	0	0.524	0	0	0	0.636
	AT5G52970	SULA	633461	616306	3702.AT5G52970.1	3702.AT2G21280.1	0	0	0	0	0.635	0	0	0	0.635
	ENH1	CRD1	630351	623904	3702.AT5G17170.1	3702.AT3G56940.1	0	0	0	0	0.425	0	0	0.391	0.635
	LQY1	AT1G04420	614373	608196	3702.AT1G75690.1	3702.AT1G04420.1	0	0	0	0	0.635	0	0	0	0.635
	CRD1	LQY1	623904	614373	3702.AT3G56940.1	3702.AT1G75690.1	0	0	0	0	0.634	0	0	0	0.634
	XTH9	AT1G60000	624974	612742	3702.AT4G03210.1	3702.AT1G60000.1	0	0	0	0	0	0	0	0.634	0.634
	PRXQ	PSAH2	621899	612091	3702.AT3G26060.2	3702.AT1G52230.1	0	0	0	0	0.632	0	0	0.047	0.634
	AT4G27280	AT2G41640	627335	618477	3702.AT4G27280.1	3702.AT2G41640.1	0	0	0	0	0.634	0	0	0	0.634
	ERF4	WRKY33	620706	618130	3702.AT3G15210.1	3702.AT2G38470.1	0	0	0	0	0.342	0	0	0.467	0.634
	PRXQ	AT1G14270	621899	609262	3702.AT3G26060.2	3702.AT1G14270.1	0.065	0	0	0	0.623	0	0	0	0.633
	AT4G01150	TRX-M4	624737	620727	3702.AT4G01150.1	3702.AT3G15360.1	0	0	0	0	0.632	0	0	0	0.632
	SBPASE	APL2	623790	610587	3702.AT3G55800.1	3702.AT1G27680.1	0	0	0	0	0.06	0	0	0.625	0.632
	AT3G47650	AT1G04420	622907	608196	3702.AT3G47650.1	3702.AT1G04420.1	0	0	0	0	0.631	0	0	0	0.631
	ABCB2	KCS10	627196	616818	3702.AT4G25960.1	3702.AT2G26250.1	0	0	0	0	0.63	0	0	0	0.63
	AT5G24010	ADF5	631007	615813	3702.AT5G24010.1	3702.AT2G16700.1	0	0	0	0	0	0.146	0	0.584	0.629
	HCF101	TLP18.3	621724	612371	3702.AT3G24430.1	3702.AT1G54780.1	0	0	0	0	0.594	0	0	0.125	0.629
	GPDHC1	GAPA-2	618469	609120	3702.AT2G41540.2	3702.AT1G12900.1	0	0	0	0	0.048	0.468	0	0.328	0.629
	AT2G42220	FNR2	618539	609854	3702.AT2G42220.1	3702.AT1G20020.1	0	0	0	0	0.628	0	0	0	0.628
	ABCB2	ABCG32	627196	616887	3702.AT4G25960.1	3702.AT2G26910.1	0	0	0	0.54	0.56	0.074	0	0.297	0.627
	PSAN	FNR2	634646	609854	3702.AT5G64040.2	3702.AT1G20020.1	0	0	0	0	0.588	0	0	0.132	0.627
	AT1G78780	AT1G35420	614692	611307	3702.AT1G78780.2	3702.AT1G35420.2	0	0	0	0	0	0	0	0.627	0.627
	AT1G56500	LrgB	612554	611016	3702.AT1G56500.1	3702.AT1G32080.1	0.074	0	0	0	0.609	0	0	0.046	0.624
	CNGC5	At5g46330	634007	632741	3702.AT5G57940.1	3702.AT5G46330.1	0	0	0	0	0	0	0.6	0.097	0.623
	TRX-M4	HPR	620727	613587	3702.AT3G15360.1	3702.AT1G68010.2	0	0	0	0	0.622	0	0	0.045	0.623
	emb2726	GAPA-2	627535	609120	3702.AT4G29060.1	3702.AT1G12900.1	0	0	0	0	0.505	0	0	0.27	0.623
	AT2G41640	GLYR2	618477	609619	3702.AT2G41640.1	3702.AT1G17650.1	0	0	0	0	0	0	0	0.623	0.623
	TRX1	RCA	623277	618258	3702.AT3G51030.1	3702.AT2G39730.1	0	0	0	0	0	0	0	0.623	0.623
	CSP41A	LHCB6	624555	609430	3702.AT3G63140.1	3702.AT1G15820.1	0	0	0	0	0.621	0	0	0.048	0.623
	PRXQ	AT1G18060	621899	609659	3702.AT3G26060.2	3702.AT1G18060.1	0	0	0	0	0.622	0	0	0	0.622
	emb2184	PSAH2	614342	612091	3702.AT1G75350.1	3702.AT1G52230.1	0	0	0	0	0.622	0	0	0	0.622
	HCF101	CYP97A3	621724	610986	3702.AT3G24430.1	3702.AT1G31800.1	0	0	0	0	0.621	0	0	0	0.621
	SBPASE	LHCB4.2	623790	620000	3702.AT3G55800.1	3702.AT3G08940.2	0	0	0	0	0.61	0	0	0.069	0.621
	SHM1	TRX-M4	628497	620727	3702.AT4G37930.1	3702.AT3G15360.1	0	0	0	0	0.619	0	0	0.046	0.62
	RBOHD	LOX4	632911	614050	3702.AT5G47910.1	3702.AT1G72520.1	0	0	0	0	0.401	0	0	0.392	0.62
	HCF136	AT1G18060	630913	609659	3702.AT5G23120.1	3702.AT1G18060.1	0	0	0	0	0.619	0	0	0	0.619
	AT5G58330	emb2726	634048	627535	3702.AT5G58330.1	3702.AT4G29060.1	0	0	0	0	0.516	0	0	0.242	0.617
	AT4G08850	WRKY70	625294	623849	3702.AT4G08850.1	3702.AT3G56400.1	0	0	0	0	0.117	0	0	0.584	0.616
	PETC	AT1G56500	624981	612554	3702.AT4G03280.1	3702.AT1G56500.1	0	0	0	0	0.452	0	0	0.328	0.616
	AT1G04420	AT1G01320	608196	607875	3702.AT1G04420.1	3702.AT1G01320.1	0	0	0	0	0.616	0	0	0	0.616
	SULA	LrgB	616306	611016	3702.AT2G21280.1	3702.AT1G32080.1	0	0	0	0	0.616	0	0	0	0.616
	FNR2	LHCB6	609854	609430	3702.AT1G20020.1	3702.AT1G15820.1	0	0	0	0	0.492	0	0	0.275	0.616
	NTRC	CYP97A3	618481	610986	3702.AT2G41680.1	3702.AT1G31800.1	0	0	0	0	0.613	0	0	0.05	0.616
	CNGC1	At5g46330	633479	632741	3702.AT5G53130.1	3702.AT5G46330.1	0	0	0	0	0	0	0.6	0.081	0.616
	TL29	AT1G51110	625316	611974	3702.AT4G09010.1	3702.AT1G51110.1	0	0	0	0	0.615	0	0	0	0.615
	FBA2	DHS2	628603	628021	3702.AT4G38970.1	3702.AT4G33510.1	0	0	0	0	0.078	0	0.6	0	0.615
	HPR	AT1G18060	613587	609659	3702.AT1G68010.2	3702.AT1G18060.1	0	0	0	0	0.615	0	0	0	0.615
	AT3G18680	AT2G37660	621091	618044	3702.AT3G18680.1	3702.AT2G37660.1	0	0	0	0	0.615	0	0	0	0.615
	SULA	AT1G14270	616306	609262	3702.AT2G21280.1	3702.AT1G14270.1	0	0	0	0	0.615	0	0	0	0.615
	PRXQ	AT1G60000	621899	612742	3702.AT3G26060.2	3702.AT1G60000.1	0	0	0	0	0.612	0	0	0	0.612
	PETC	AT2G42220	624981	618539	3702.AT4G03280.1	3702.AT2G42220.1	0	0	0	0	0.611	0	0	0	0.611
	AT4G27280	ERF-1	627335	626271	3702.AT4G27280.1	3702.AT4G17500.1	0	0	0	0	0.522	0	0	0.221	0.611
	SHM1	NTRC	628497	618481	3702.AT4G37930.1	3702.AT2G41680.1	0.052	0	0	0	0.424	0	0	0.343	0.61
	TRX-M4	PSAH2	620727	612091	3702.AT3G15360.1	3702.AT1G52230.1	0	0	0	0	0.609	0	0	0.045	0.61
	DAC	PSBW	621007	617266	3702.AT3G17930.1	3702.AT2G30570.1	0	0	0	0	0.482	0	0	0.274	0.608
	emb2726	AT2G37660	627535	618044	3702.AT4G29060.1	3702.AT2G37660.1	0	0	0	0	0.608	0	0	0	0.608
	HPR	AT1G56500	613587	612554	3702.AT1G68010.2	3702.AT1G56500.1	0.069	0	0	0	0.597	0	0	0	0.608
	CRB	AT1G01970	608726	607941	3702.AT1G09340.1	3702.AT1G01970.1	0	0	0	0	0.213	0	0	0.523	0.608
	PSBQ-2	CSP41A	625139	624555	3702.AT4G05180.1	3702.AT3G63140.1	0	0	0	0	0.606	0	0	0	0.606
	FBS1	AT1G23710	612876	610241	3702.AT1G61340.2	3702.AT1G23710.1	0	0	0	0	0.606	0	0	0	0.606
	emb2726	AT1G60000	627535	612742	3702.AT4G29060.1	3702.AT1G60000.1	0	0	0	0	0.605	0	0	0	0.605
	HCF136	FBA2	630913	628603	3702.AT5G23120.1	3702.AT4G38970.1	0	0	0	0	0.525	0	0	0.203	0.605
	AT2G37660	CRB	618044	608726	3702.AT2G37660.1	3702.AT1G09340.1	0	0	0	0	0.605	0	0	0	0.605
	AT3G47650	ARASP	622907	617479	3702.AT3G47650.1	3702.AT2G32480.1	0	0	0	0	0.604	0	0	0	0.604
	AT3G06950	HBP1	619837	609559	3702.AT3G06950.1	3702.AT1G17100.1	0	0	0	0	0.06	0	0	0.597	0.604
	AT5G52970	CRB	633461	608726	3702.AT5G52970.1	3702.AT1G09340.1	0	0	0	0	0.604	0	0	0	0.604
	LQY1	AT1G12250	614373	609050	3702.AT1G75690.1	3702.AT1G12250.1	0	0	0	0	0.544	0	0	0.166	0.604
	SBPASE	AT2G37660	623790	618044	3702.AT3G55800.1	3702.AT2G37660.1	0	0	0	0	0.59	0	0	0.072	0.603
	RGL1	GA2OX2	613410	610812	3702.AT1G66350.1	3702.AT1G30040.1	0	0	0	0	0	0	0	0.603	0.603
	IAMT1	ERF4	633715	620706	3702.AT5G55250.1	3702.AT3G15210.1	0	0	0	0	0	0	0	0.601	0.601
	AT3G47070	FNR2	622854	609854	3702.AT3G47070.1	3702.AT1G20020.1	0	0	0	0	0.601	0	0	0	0.601
	LQY1	FNR2	614373	609854	3702.AT1G75690.1	3702.AT1G20020.1	0	0	0	0	0.601	0	0	0	0.601
	DHS1	FBA2	628711	628603	3702.AT4G39980.1	3702.AT4G38970.1	0	0	0	0	0	0	0.6	0	0.6
	AT5G65260	LSH10	634782	618578	3702.AT5G65260.1	3702.AT2G42610.1	0	0	0	0	0	0	0	0.6	0.6
	ENH1	FNR2	630351	609854	3702.AT5G17170.1	3702.AT1G20020.1	0	0	0	0	0.6	0	0	0	0.6
	APG3	NTRC	624529	618481	3702.AT3G62910.1	3702.AT2G41680.1	0.19	0	0	0	0.52	0	0	0.053	0.6
	FBA2	AT4G33070	628603	627974	3702.AT4G38970.1	3702.AT4G33070.1	0	0	0	0	0	0	0.6	0	0.6
	PSBQ-2	AT3G47070	625139	622854	3702.AT4G05180.1	3702.AT3G47070.1	0	0	0	0	0.599	0	0	0	0.599
	AT2G37660	TLP18.3	618044	612371	3702.AT2G37660.1	3702.AT1G54780.1	0	0	0	0	0.599	0	0	0	0.599
	APE2	LrgB	632718	611016	3702.AT5G46110.4	3702.AT1G32080.1	0	0	0	0	0.448	0	0	0.304	0.599
	PSI-P	LrgB	619027	611016	3702.AT2G46820.1	3702.AT1G32080.1	0	0	0	0	0.598	0	0	0	0.598
	PRXQ	LHCB6	621899	609430	3702.AT3G26060.2	3702.AT1G15820.1	0	0	0	0	0.489	0	0	0.245	0.598
	AT1G56500	AT1G12250	612554	609050	3702.AT1G56500.1	3702.AT1G12250.1	0.098	0	0	0	0.438	0	0	0.272	0.598
	SULA	AT1G57770	616306	612601	3702.AT2G21280.1	3702.AT1G57770.1	0.19	0	0	0	0.523	0	0	0	0.597
	HCF101	AT1G51110	621724	611974	3702.AT3G24430.1	3702.AT1G51110.1	0	0	0	0	0.597	0	0	0	0.597
	HPR	LHCB6	613587	609430	3702.AT1G68010.2	3702.AT1G15820.1	0	0	0	0	0.597	0	0	0	0.597
	HPR	AT1G51110	613587	611974	3702.AT1G68010.2	3702.AT1G51110.1	0	0	0	0	0.597	0	0	0	0.597
	TLP18.3	LrgB	612371	611016	3702.AT1G54780.1	3702.AT1G32080.1	0	0	0	0	0.596	0	0	0	0.596
	LrgB	AT1G14270	611016	609262	3702.AT1G32080.1	3702.AT1G14270.1	0.186	0	0	0	0.523	0	0	0	0.595
	ANT	MP	628478	609837	3702.AT4G37750.1	3702.AT1G19850.1	0	0	0	0	0.103	0	0	0.567	0.594
	PSAN	PRXQ	634646	621899	3702.AT5G64040.2	3702.AT3G26060.2	0	0	0	0	0.549	0	0	0.137	0.594
	APE2	FNR2	632718	609854	3702.AT5G46110.4	3702.AT1G20020.1	0	0	0	0	0.594	0	0	0	0.594
	AT5G14450	TLP8	630068	609458	3702.AT5G14450.1	3702.AT1G16070.2	0	0	0	0	0	0	0	0.593	0.593
	AT5G14450	SVB	630068	612564	3702.AT5G14450.1	3702.AT1G56580.1	0	0	0	0	0	0	0	0.593	0.593
	AT2G42220	AT1G18060	618539	609659	3702.AT2G42220.1	3702.AT1G18060.1	0	0	0	0	0.593	0	0	0	0.593
	APE2	PRXQ	632718	621899	3702.AT5G46110.4	3702.AT3G26060.2	0	0	0	0	0.592	0	0	0	0.592
	SBPASE	AT3G47650	623790	622907	3702.AT3G55800.1	3702.AT3G47650.1	0	0	0	0	0.591	0	0	0	0.591
	ENH1	PETC	630351	624981	3702.AT5G17170.1	3702.AT4G03280.1	0	0	0	0	0.591	0	0	0	0.591
	AT2G42220	PSAO	618539	608627	3702.AT2G42220.1	3702.AT1G08380.1	0	0	0	0	0.59	0	0	0	0.59
	LHCB4.2	FNR2	620000	609854	3702.AT3G08940.2	3702.AT1G20020.1	0	0	0	0	0.395	0	0	0.35	0.59
	emb2726	AT1G01320	627535	607875	3702.AT4G29060.1	3702.AT1G01320.1	0	0	0	0	0.59	0	0	0	0.59
	AT5G58330	GLYR2	634048	609619	3702.AT5G58330.1	3702.AT1G17650.1	0.058	0	0	0	0.158	0.298	0	0.35	0.589
	HPR	AT1G35420	613587	611307	3702.AT1G68010.2	3702.AT1G35420.2	0.066	0	0	0	0.574	0	0	0.048	0.588
	AT3G47650	SULA	622907	616306	3702.AT3G47650.1	3702.AT2G21280.1	0	0	0	0	0.588	0	0	0	0.588
	AT1G72250	CSLD5	614024	608023	3702.AT1G72250.2	3702.AT1G02730.1	0	0	0	0	0.571	0.079	0	0	0.588
	TL29	RDR1	625316	609324	3702.AT4G09010.1	3702.AT1G14790.1	0	0	0	0	0	0	0	0.588	0.588
	AT1G51110	LrgB	611974	611016	3702.AT1G51110.1	3702.AT1G32080.1	0	0	0	0	0.588	0	0	0	0.588
	AT2G41710	AT2G37660	618485	618044	3702.AT2G41710.3	3702.AT2G37660.1	0	0	0	0	0	0	0	0.588	0.588
	AT5G52970	PETC	633461	624981	3702.AT5G52970.1	3702.AT4G03280.1	0	0	0.212	0	0.499	0	0	0	0.588
	AT5G52970	AT1G51110	633461	611974	3702.AT5G52970.1	3702.AT1G51110.1	0	0	0	0	0.588	0	0	0	0.588
	PRR7	LHW	628917	616924	3702.AT5G02810.1	3702.AT2G27230.2	0	0	0	0	0	0	0	0.587	0.587
	AT4G27280	ATL2	627335	620875	3702.AT4G27280.1	3702.AT3G16720.1	0	0	0	0	0.584	0.048	0	0	0.587
	PSBO2	AT1G12250	623254	609050	3702.AT3G50820.1	3702.AT1G12250.1	0	0	0.225	0	0.486	0	0	0.048	0.587
	PRR7	AT3G51950	628917	623376	3702.AT5G02810.1	3702.AT3G51950.2	0	0	0	0	0	0	0	0.587	0.587
	CaS	CRD1	630907	623904	3702.AT5G23060.1	3702.AT3G56940.1	0	0	0	0	0.586	0	0	0	0.586
	AT3G47650	CRB	622907	608726	3702.AT3G47650.1	3702.AT1G09340.1	0	0	0	0	0.586	0	0	0	0.586
	AT5G58330	SULA	634048	616306	3702.AT5G58330.1	3702.AT2G21280.1	0.18	0	0	0	0.511	0	0	0.05	0.586
	AT1G56500	GAPA-2	612554	609120	3702.AT1G56500.1	3702.AT1G12900.1	0.105	0	0	0	0.46	0.049	0	0.205	0.586
	AT3G54630	AT1G72250	623659	614024	3702.AT3G54630.1	3702.AT1G72250.2	0	0	0	0	0.488	0.175	0	0.099	0.586
	SHM1	LHCB6	628497	609430	3702.AT4G37930.1	3702.AT1G15820.1	0	0	0	0	0.586	0	0	0	0.586
	PSAN	CSP41A	634646	624555	3702.AT5G64040.2	3702.AT3G63140.1	0	0	0	0	0.586	0	0	0	0.586
	TRX-M4	NTRC	620727	618481	3702.AT3G15360.1	3702.AT2G41680.1	0.065	0	0	0.649	0.308	0.154	0	0.87	0.585
	SHM1	PSAL	628497	625711	3702.AT4G37930.1	3702.AT4G12800.1	0	0	0	0	0.578	0	0	0.059	0.585
	AT5G52970	PSAL	633461	625711	3702.AT5G52970.1	3702.AT4G12800.1	0	0	0.308	0	0.424	0	0	0	0.584
	AT2G37660	SULA	618044	616306	3702.AT2G37660.1	3702.AT2G21280.1	0.171	0	0	0	0.519	0	0	0	0.584
	AT3G47650	AT1G14270	622907	609262	3702.AT3G47650.1	3702.AT1G14270.1	0	0	0	0	0.584	0	0	0	0.584
	AT5G58330	SHM1	634048	628497	3702.AT5G58330.1	3702.AT4G37930.1	0.095	0	0	0	0.521	0	0	0.118	0.584
	HCF136	TL29	630913	625316	3702.AT5G23120.1	3702.AT4G09010.1	0	0	0	0	0.565	0	0	0.083	0.584
	AT2G44830	LHW	618817	616924	3702.AT2G44830.1	3702.AT2G27230.2	0	0	0	0	0.073	0	0	0.57	0.584
	ENH1	PSAL	630351	625711	3702.AT5G17170.1	3702.AT4G12800.1	0	0	0	0	0.46	0	0	0.261	0.584
	SERAT1;1	LCD	633876	624449	3702.AT5G56760.1	3702.AT3G62130.1	0	0	0	0	0	0	0	0.583	0.583
	TL29	HPR	625316	613587	3702.AT4G09010.1	3702.AT1G68010.2	0	0	0	0	0.582	0	0	0	0.582
	BCB	WRKY33	630684	618130	3702.AT5G20230.1	3702.AT2G38470.1	0	0	0	0	0.452	0	0	0.27	0.582
	AT3G59080	AT3G55470	624123	623749	3702.AT3G59080.1	3702.AT3G55470.1	0	0	0	0	0.582	0	0	0	0.582
	RDR1	GAPA-2	609324	609120	3702.AT1G14790.1	3702.AT1G12900.1	0	0	0	0	0	0	0	0.582	0.582
	PSAN	AT1G56500	634646	612554	3702.AT5G64040.2	3702.AT1G56500.1	0	0	0	0	0.418	0	0	0.309	0.58
	ENH1	RCA	630351	618258	3702.AT5G17170.1	3702.AT2G39730.1	0	0	0	0	0.58	0	0	0	0.58
	AT3G53190	CSLD5	623508	608023	3702.AT3G53190.1	3702.AT1G02730.1	0	0	0	0	0.58	0	0	0	0.58
	CaS	ENH1	630907	630351	3702.AT5G23060.1	3702.AT5G17170.1	0	0	0	0	0.58	0	0	0	0.58
	TRX1	AT1G60420	623277	612776	3702.AT3G51030.1	3702.AT1G60420.1	0	0	0	0	0	0	0	0.579	0.579
	AT4G01150	HPR	624737	613587	3702.AT4G01150.1	3702.AT1G68010.2	0	0	0	0	0.578	0	0	0	0.578
	AT4G27280	GATL10	627335	622158	3702.AT4G27280.1	3702.AT3G28340.1	0	0	0	0	0.578	0	0	0	0.578
	MYB68	AT5G01210	634841	628750	3702.AT5G65790.1	3702.AT5G01210.1	0	0	0	0	0	0	0	0.578	0.578
	ARK3	CRB	609070	608726	3702.AT1G12430.2	3702.AT1G09340.1	0	0	0	0	0	0	0	0.578	0.578
	CSP41A	AT1G04420	624555	608196	3702.AT3G63140.1	3702.AT1G04420.1	0	0	0	0	0.577	0	0	0	0.577
	emb2184	LrgB	614342	611016	3702.AT1G75350.1	3702.AT1G32080.1	0.19	0	0	0	0.5	0	0	0	0.577
	MYB15	WRKY33	621596	618130	3702.AT3G23250.1	3702.AT2G38470.1	0	0	0	0	0.442	0	0	0.273	0.577
	AT2G26500	LHCB6	616844	609430	3702.AT2G26500.1	3702.AT1G15820.1	0	0	0	0	0.577	0	0	0	0.577
	NTRC	SULA	618481	616306	3702.AT2G41680.1	3702.AT2G21280.1	0.056	0	0	0	0.569	0	0	0	0.576
	AT4G32250	AT2G36570	627882	617922	3702.AT4G32250.2	3702.AT2G36570.1	0	0	0	0	0.048	0.074	0	0.557	0.575
	PHB	MP	617724	609837	3702.AT2G34710.1	3702.AT1G19850.1	0	0	0	0	0.073	0	0	0.561	0.575
	WRKY70	LOX2	623849	622651	3702.AT3G56400.1	3702.AT3G45140.1	0	0	0	0	0.062	0	0	0.565	0.574
	MEE59	PC-MYB1	628431	627938	3702.AT4G37300.1	3702.AT4G32730.2	0	0	0	0	0	0	0	0.573	0.573
	SULA	emb2184	616306	614342	3702.AT2G21280.1	3702.AT1G75350.1	0	0	0	0	0.573	0	0	0	0.573
	emb2726	CRB	627535	608726	3702.AT4G29060.1	3702.AT1G09340.1	0	0	0	0	0.573	0	0	0	0.573
	AT3G47070	RCA	622854	618258	3702.AT3G47070.1	3702.AT2G39730.1	0	0	0	0	0.571	0	0	0.047	0.573
	AT5G58330	CSP41A	634048	624555	3702.AT5G58330.1	3702.AT3G63140.1	0	0	0	0	0.553	0	0	0.083	0.573
	CaS	AT1G51110	630907	611974	3702.AT5G23060.1	3702.AT1G51110.1	0	0	0	0	0.572	0	0	0	0.572
	NTRC	FNR2	618481	609854	3702.AT2G41680.1	3702.AT1G20020.1	0.166	0	0	0	0.367	0	0	0.255	0.572
	AT4G01150	FNR2	624737	609854	3702.AT4G01150.1	3702.AT1G20020.1	0	0	0	0	0.572	0	0	0	0.572
	RCA	APL2	618258	610587	3702.AT2G39730.1	3702.AT1G27680.1	0	0	0	0	0.093	0	0	0.547	0.571
	APE2	CT-BMY	632718	626232	3702.AT5G46110.4	3702.AT4G17090.1	0	0	0	0	0.199	0	0	0.485	0.57
	AT5G52970	AT2G42220	633461	618539	3702.AT5G52970.1	3702.AT2G42220.1	0	0	0	0	0.57	0	0	0	0.57
	ENH1	AT2G26500	630351	616844	3702.AT5G17170.1	3702.AT2G26500.1	0	0	0	0	0.57	0	0	0	0.57
	PAP29	PAP18	634555	621289	3702.AT5G63140.1	3702.AT3G20500.1	0	0	0	0	0	0	0	0.569	0.569
	TL29	AT2G37660	625316	618044	3702.AT4G09010.1	3702.AT2G37660.1	0	0	0	0	0.569	0	0	0	0.569
	HCF101	GAPA-2	621724	609120	3702.AT3G24430.1	3702.AT1G12900.1	0	0	0	0	0.564	0	0	0.053	0.569
	CaS	AT2G26500	630907	616844	3702.AT5G23060.1	3702.AT2G26500.1	0	0	0	0	0.568	0	0	0	0.568
	AT3G51950	LHW	623376	616924	3702.AT3G51950.2	3702.AT2G27230.2	0	0	0	0	0.058	0	0	0.56	0.567
	BLH1	OFP16	617855	617440	3702.AT2G35940.3	3702.AT2G32100.1	0	0	0	0	0	0	0	0.567	0.567
	GA2	RGL1	614763	613410	3702.AT1G79460.1	3702.AT1G66350.1	0	0	0	0	0	0	0	0.567	0.567
	AT5G52970	TLP18.3	633461	612371	3702.AT5G52970.1	3702.AT1G54780.1	0	0	0	0	0.567	0	0	0	0.567
	CaS	TL29	630907	625316	3702.AT5G23060.1	3702.AT4G09010.1	0	0	0	0	0.567	0	0	0	0.567
	AT5G40460	AT4G28230	632081	627442	3702.AT5G40460.1	3702.AT4G28230.1	0	0	0	0	0	0	0	0.567	0.567
	MOL1	AT4G24110	633288	626995	3702.AT5G51350.1	3702.AT4G24110.1	0	0	0	0	0	0	0	0.566	0.566
	SBPASE	AT2G26500	623790	616844	3702.AT3G55800.1	3702.AT2G26500.1	0	0	0	0	0.566	0	0	0	0.566
	SBPASE	PSBW	623790	617266	3702.AT3G55800.1	3702.AT2G30570.1	0	0	0	0	0.557	0	0	0.06	0.566
	AT2G37660	AT1G14270	618044	609262	3702.AT2G37660.1	3702.AT1G14270.1	0.101	0	0	0	0.536	0	0	0	0.565
	AT5G52970	HCF101	633461	621724	3702.AT5G52970.1	3702.AT3G24430.1	0	0	0	0	0.468	0	0	0.216	0.565
	SULA	AT1G56500	616306	612554	3702.AT2G21280.1	3702.AT1G56500.1	0.042	0	0	0	0.464	0	0	0.221	0.565
	PETC	AT2G31040	624981	617320	3702.AT4G03280.1	3702.AT2G31040.1	0	0	0	0	0.255	0	0	0.44	0.565
	PRR5	PHYA	631062	608751	3702.AT5G24470.1	3702.AT1G09570.1	0	0	0	0	0	0	0	0.565	0.565
	LHW	MP	616924	609837	3702.AT2G27230.2	3702.AT1G19850.1	0	0	0	0	0.062	0	0	0.555	0.564
	NTRC	AT1G04420	618481	608196	3702.AT2G41680.1	3702.AT1G04420.1	0.177	0	0	0	0.434	0.05	0	0.13	0.563
	CYP97A3	CRB	610986	608726	3702.AT1G31800.1	3702.AT1G09340.1	0	0	0	0	0.563	0	0	0	0.563
	SULA	AT1G18060	616306	609659	3702.AT2G21280.1	3702.AT1G18060.1	0	0	0	0	0.562	0	0	0	0.562
	TL29	LrgB	625316	611016	3702.AT4G09010.1	3702.AT1G32080.1	0	0	0	0	0.561	0	0	0	0.561
	GATL10	STZ	622158	610593	3702.AT3G28340.1	3702.AT1G27730.1	0	0	0	0	0.553	0	0	0.059	0.561
	AT5G52970	AT1G14270	633461	609262	3702.AT5G52970.1	3702.AT1G14270.1	0	0	0	0	0.561	0	0	0	0.561
	HCF101	AT1G04420	621724	608196	3702.AT3G24430.1	3702.AT1G04420.1	0	0	0	0	0.561	0	0	0	0.561
	TLP18.3	AT1G18060	612371	609659	3702.AT1G54780.1	3702.AT1G18060.1	0	0	0	0	0.561	0	0	0	0.561
	AT4G27280	AT1G23710	627335	610241	3702.AT4G27280.1	3702.AT1G23710.1	0	0	0	0	0.561	0	0	0	0.561
	AT5G62350	BGLU44	634468	621022	3702.AT5G62350.1	3702.AT3G18080.1	0	0	0	0	0.112	0	0	0.525	0.56
	HCF136	AT1G57770	630913	612601	3702.AT5G23120.1	3702.AT1G57770.1	0	0	0.276	0	0.418	0	0	0	0.56
	SULA	AT1G04420	616306	608196	3702.AT2G21280.1	3702.AT1G04420.1	0	0	0	0	0.56	0	0	0	0.56
	RBOHD	At5g46330	632911	632741	3702.AT5G47910.1	3702.AT5G46330.1	0	0	0	0	0	0.049	0	0.557	0.56
	AT5G52970	FNR2	633461	609854	3702.AT5G52970.1	3702.AT1G20020.1	0	0	0	0	0.56	0	0	0	0.56
	AT1G14270	CRB	609262	608726	3702.AT1G14270.1	3702.AT1G09340.1	0	0	0	0	0.56	0	0	0	0.56
	HCF136	SULA	630913	616306	3702.AT5G23120.1	3702.AT2G21280.1	0	0	0	0	0.559	0	0	0	0.559
	BCB	BCS1	630684	623267	3702.AT5G20230.1	3702.AT3G50930.1	0	0	0	0	0.376	0	0	0.321	0.558
	LOX4	FBS1	614050	612876	3702.AT1G72520.1	3702.AT1G61340.2	0	0	0	0	0.46	0	0	0.214	0.557
	emb2726	HCF101	627535	621724	3702.AT4G29060.1	3702.AT3G24430.1	0	0	0	0	0.557	0	0	0	0.557
	CSP41A	AT2G26500	624555	616844	3702.AT3G63140.1	3702.AT2G26500.1	0	0	0	0	0.557	0	0	0	0.557
	GLYR2	AT1G04420	609619	608196	3702.AT1G17650.1	3702.AT1G04420.1	0.059	0	0	0	0.535	0	0	0.065	0.555
	AT3G47070	AT1G18060	622854	609659	3702.AT3G47070.1	3702.AT1G18060.1	0	0	0	0	0.555	0	0	0	0.555
	TRX-M4	AT1G56500	620727	612554	3702.AT3G15360.1	3702.AT1G56500.1	0	0	0	0	0.449	0.124	0	0.151	0.554
	THIC	AT2G22650	617168	616442	3702.AT2G29630.2	3702.AT2G22650.1	0.19	0	0	0	0	0	0	0.473	0.554
	RCA	LrgB	618258	611016	3702.AT2G39730.1	3702.AT1G32080.1	0	0	0	0	0.5	0	0	0.143	0.553
	SULA	AT1G35420	616306	611307	3702.AT2G21280.1	3702.AT1G35420.2	0	0	0	0	0.407	0	0	0.277	0.553
	AT1G51110	CYP97A3	611974	610986	3702.AT1G51110.1	3702.AT1G31800.1	0	0	0	0	0.553	0	0	0	0.553
	ERF-1	AT1G23710	626271	610241	3702.AT4G17500.1	3702.AT1G23710.1	0	0	0	0	0.553	0	0	0	0.553
	ATL2	AT1G23710	620875	610241	3702.AT3G16720.1	3702.AT1G23710.1	0	0	0	0	0.553	0	0	0	0.553
	AT2G42220	AT2G37660	618539	618044	3702.AT2G42220.1	3702.AT2G37660.1	0	0	0	0	0.553	0	0	0	0.553
	SCL3	PHYA	611904	608751	3702.AT1G50420.1	3702.AT1G09570.1	0	0	0	0	0	0	0	0.553	0.553
	PRR5	GA2OX6	631062	607989	3702.AT5G24470.1	3702.AT1G02400.1	0	0	0	0	0	0	0	0.553	0.553
	APE2	TRX-M4	632718	620727	3702.AT5G46110.4	3702.AT3G15360.1	0	0	0	0	0.552	0	0	0	0.552
	AT3G59080	AT2G41640	624123	618477	3702.AT3G59080.1	3702.AT2G41640.1	0	0	0	0	0.551	0	0	0	0.551
	PSBO2	AT2G37660	623254	618044	3702.AT3G50820.1	3702.AT2G37660.1	0	0	0	0	0.502	0	0	0.136	0.551
	PSBO2	AT1G60000	623254	612742	3702.AT3G50820.1	3702.AT1G60000.1	0	0	0	0	0.501	0	0	0.136	0.551
	PSBO2	AT1G51110	623254	611974	3702.AT3G50820.1	3702.AT1G51110.1	0	0	0	0	0.551	0	0	0	0.551
	SULA	AT1G51110	616306	611974	3702.AT2G21280.1	3702.AT1G51110.1	0	0	0	0	0.551	0	0	0	0.551
	emb2184	AT1G60000	614342	612742	3702.AT1G75350.1	3702.AT1G60000.1	0	0	0	0	0.447	0.222	0	0	0.551
	AT2G42220	SULA	618539	616306	3702.AT2G42220.1	3702.AT2G21280.1	0	0	0	0	0.55	0	0	0	0.55
	AT2G42220	AT1G51110	618539	611974	3702.AT2G42220.1	3702.AT1G51110.1	0	0	0	0	0.55	0	0	0	0.55
	HCF101	AT2G37660	621724	618044	3702.AT3G24430.1	3702.AT2G37660.1	0	0	0	0	0.55	0	0	0	0.55
	SULA	FNR2	616306	609854	3702.AT2G21280.1	3702.AT1G20020.1	0	0	0	0	0.55	0	0	0	0.55
	AT1G18060	AT1G12250	609659	609050	3702.AT1G18060.1	3702.AT1G12250.1	0	0	0	0	0.55	0	0	0	0.55
	EXO70H7	AT1G23220	634194	610196	3702.AT5G59730.1	3702.AT1G23220.1	0	0	0	0	0	0	0	0.55	0.55
	ATL2	MKK9	620875	614150	3702.AT3G16720.1	3702.AT1G73500.1	0	0	0	0	0.549	0	0	0	0.549
	PSI-P	AT1G18060	619027	609659	3702.AT2G46820.1	3702.AT1G18060.1	0	0	0	0	0.549	0	0	0	0.549
	EMB2820	emb2184	631084	614342	3702.AT5G24670.2	3702.AT1G75350.1	0.19	0	0	0	0	0	0	0.465	0.548
	HSFA4A	MP	626431	609837	3702.AT4G18880.1	3702.AT1G19850.1	0	0	0	0	0	0	0	0.548	0.548
	AT1G49850	MP	611851	609837	3702.AT1G49850.1	3702.AT1G19850.1	0	0	0	0	0	0	0	0.548	0.548
	HSFA4A	ERF-1	626431	626271	3702.AT4G18880.1	3702.AT4G17500.1	0	0	0	0	0.346	0	0	0.338	0.548
	ERF-1	AT2G41640	626271	618477	3702.AT4G17500.1	3702.AT2G41640.1	0	0	0	0	0.547	0	0	0	0.547
	PSAL	PAP18	625711	621289	3702.AT4G12800.1	3702.AT3G20500.1	0	0	0	0	0	0	0	0.547	0.547
	HSFA4A	AT1G23710	626431	610241	3702.AT4G18880.1	3702.AT1G23710.1	0	0	0	0	0.545	0	0	0	0.545
	AT5G17350	STZ	630371	610593	3702.AT5G17350.1	3702.AT1G27730.1	0	0	0	0	0.544	0	0	0	0.544
	SBPASE	CYP97A3	623790	610986	3702.AT3G55800.1	3702.AT1G31800.1	0	0	0	0	0.544	0	0	0	0.544
	TL29	PSAO	625316	608627	3702.AT4G09010.1	3702.AT1G08380.1	0	0	0	0	0.544	0	0	0	0.544
	PETC	AT1G04420	624981	608196	3702.AT4G03280.1	3702.AT1G04420.1	0.058	0	0	0	0.438	0	0	0.208	0.544
	CSP41A	AT1G14270	624555	609262	3702.AT3G63140.1	3702.AT1G14270.1	0	0	0	0	0.544	0	0	0	0.544
	AT1G57770	AT1G51110	612601	611974	3702.AT1G57770.1	3702.AT1G51110.1	0	0	0	0	0.544	0	0	0	0.544
	PETC	AT1G57770	624981	612601	3702.AT4G03280.1	3702.AT1G57770.1	0	0	0	0	0.435	0	0	0.225	0.543
	AT1G51110	GAPA-2	611974	609120	3702.AT1G51110.1	3702.AT1G12900.1	0	0	0	0	0.542	0	0	0	0.542
	AT5G58330	AO	634048	630099	3702.AT5G58330.1	3702.AT5G14760.1	0.176	0	0	0	0.161	0.124	0	0.333	0.542
	AT1G56500	TLP18.3	612554	612371	3702.AT1G56500.1	3702.AT1G54780.1	0	0	0	0	0.443	0	0	0.211	0.541
	DAC	RCA	621007	618258	3702.AT3G17930.1	3702.AT2G39730.1	0	0	0	0	0.199	0	0	0.451	0.541
	NTRC	HPR	618481	613587	3702.AT2G41680.1	3702.AT1G68010.2	0.14	0	0	0	0.313	0	0	0.285	0.541
	APE2	TL29	632718	625316	3702.AT5G46110.4	3702.AT4G09010.1	0	0	0	0	0.541	0	0	0	0.541
	GH9B13	EXPA15	624866	615124	3702.AT4G02290.1	3702.AT2G03090.1	0	0	0	0	0.202	0	0	0.448	0.541
	CSP41A	PSAO	624555	608627	3702.AT3G63140.1	3702.AT1G08380.1	0	0	0	0	0.54	0	0	0	0.54
	BT4	SKP2A	635027	609998	3702.AT5G67480.2	3702.AT1G21410.1	0	0	0	0	0	0.042	0.54	0	0.54
	CaS	SULA	630907	616306	3702.AT5G23060.1	3702.AT2G21280.1	0	0	0	0	0.54	0	0	0	0.54
	AT1G51110	AT1G14270	611974	609262	3702.AT1G51110.1	3702.AT1G14270.1	0	0	0	0	0.539	0	0	0	0.539
	PSAH2	LrgB	612091	611016	3702.AT1G52230.1	3702.AT1G32080.1	0	0	0	0	0.538	0	0	0	0.538
	RNR2A	NTRC	621629	618481	3702.AT3G23580.1	3702.AT2G41680.1	0.09	0	0	0	0.081	0	0	0.493	0.538
	AT4G39720	WRKY33	628677	618130	3702.AT4G39720.1	3702.AT2G38470.1	0	0	0	0	0	0.534	0	0.05	0.538
	SHM1	emb2726	628497	627535	3702.AT4G37930.1	3702.AT4G29060.1	0	0	0	0	0.511	0	0	0.094	0.538
	AT5G23890	TRX1	630992	623277	3702.AT5G23890.1	3702.AT3G51030.1	0	0	0	0	0	0.536	0	0.047	0.538
	TRX1	AT3G17020	623277	620908	3702.AT3G51030.1	3702.AT3G17020.1	0	0	0	0	0.047	0.536	0	0	0.538
	TL29	HCF101	625316	621724	3702.AT4G09010.1	3702.AT3G24430.1	0	0	0	0	0.537	0	0	0	0.537
	PSBO2	LrgB	623254	611016	3702.AT3G50820.1	3702.AT1G32080.1	0	0	0	0	0.537	0	0	0	0.537
	AT5G58330	LQY1	634048	614373	3702.AT5G58330.1	3702.AT1G75690.1	0	0	0	0	0.537	0	0	0	0.537
	AT5G16990	TRX-M4	630331	620727	3702.AT5G16990.1	3702.AT3G15360.1	0	0	0	0	0.113	0	0	0.5	0.537
	DAC	TLP18.3	621007	612371	3702.AT3G17930.1	3702.AT1G54780.1	0	0	0	0	0.537	0	0	0	0.537
	AT3G47650	AT1G60000	622907	612742	3702.AT3G47650.1	3702.AT1G60000.1	0	0	0	0	0.536	0	0	0	0.536
	AT2G26500	FNR2	616844	609854	3702.AT2G26500.1	3702.AT1G20020.1	0	0	0	0	0.536	0	0	0	0.536
	PRR7	SVP	628917	616433	3702.AT5G02810.1	3702.AT2G22540.1	0	0	0	0	0.06	0.094	0	0.499	0.536
	PSAH2	AT1G51110	612091	611974	3702.AT1G52230.1	3702.AT1G51110.1	0	0	0	0	0.535	0	0	0	0.535
	SBPASE	AT1G35420	623790	611307	3702.AT3G55800.1	3702.AT1G35420.2	0	0	0	0	0.535	0	0	0	0.535
	AT1G14270	AT1G04420	609262	608196	3702.AT1G14270.1	3702.AT1G04420.1	0	0	0	0	0.535	0	0	0	0.535
	ABCG32	KCS10	616887	616818	3702.AT2G26910.1	3702.AT2G26250.1	0	0	0	0	0.534	0	0	0	0.534
	PSI-P	SULA	619027	616306	3702.AT2G46820.1	3702.AT2G21280.1	0	0	0	0	0.533	0	0	0	0.533
	ANT	PIN1	628478	614158	3702.AT4G37750.1	3702.AT1G73590.1	0	0	0	0	0.168	0	0	0.462	0.533
	FNR2	AT1G12250	609854	609050	3702.AT1G20020.1	3702.AT1G12250.1	0.175	0	0	0	0.457	0	0	0	0.533
	FBA2	LrgB	628603	611016	3702.AT4G38970.1	3702.AT1G32080.1	0	0	0	0	0.532	0	0	0	0.532
	TRX-M4	GAPA-2	620727	609120	3702.AT3G15360.1	3702.AT1G12900.1	0.053	0	0	0	0.48	0.079	0	0.09	0.532
	LCD	HCF101	624449	621724	3702.AT3G62130.1	3702.AT3G24430.1	0.189	0	0	0	0.047	0	0	0.443	0.531
	AT1G57770	TLP8	612601	609458	3702.AT1G57770.1	3702.AT1G16070.2	0	0	0	0	0	0	0	0.53	0.53
	TRX1	DAC	623277	621007	3702.AT3G51030.1	3702.AT3G17930.1	0	0	0	0	0	0	0	0.53	0.53
	AT2G31040	AT1G56500	617320	612554	3702.AT2G31040.1	3702.AT1G56500.1	0	0	0	0	0.352	0	0	0.305	0.53
	APG3	AT3G18680	624529	621091	3702.AT3G62910.1	3702.AT3G18680.1	0.19	0	0	0	0.444	0	0	0	0.53
	CRB	AT1G04420	608726	608196	3702.AT1G09340.1	3702.AT1G04420.1	0	0	0	0	0.53	0	0	0	0.53
	AT5G54930	PRR5	633679	631062	3702.AT5G54930.1	3702.AT5G24470.1	0	0	0	0	0.161	0	0	0.463	0.53
	AT5G52970	TRX-M4	633461	620727	3702.AT5G52970.1	3702.AT3G15360.1	0	0	0	0	0.524	0	0	0.055	0.53
	LSH3	SVB	617335	612564	3702.AT2G31160.1	3702.AT1G56580.1	0	0	0	0	0	0	0	0.53	0.53
	SBPASE	TRX-M4	623790	620727	3702.AT3G55800.1	3702.AT3G15360.1	0	0	0	0	0.5	0	0	0.097	0.529
	AT5G21105	PAO5	630770	627607	3702.AT5G21105.1	3702.AT4G29720.1	0	0	0	0	0	0	0	0.529	0.529
	AT5G13810	SHM1	630000	628497	3702.AT5G13810.1	3702.AT4G37930.1	0	0	0	0	0.044	0	0	0.528	0.529
	WRKY33	FBS1	618130	612876	3702.AT2G38470.1	3702.AT1G61340.2	0	0	0	0	0.484	0	0	0.126	0.529
	TRX1	GLYR2	623277	609619	3702.AT3G51030.1	3702.AT1G17650.1	0.05	0	0	0	0	0	0	0.525	0.529
	GAUT15	CSLD5	624093	608023	3702.AT3G58790.1	3702.AT1G02730.1	0	0	0	0	0	0	0	0.528	0.528
	AT5G50360	SCL3	633182	611904	3702.AT5G50360.1	3702.AT1G50420.1	0	0	0	0	0	0	0	0.528	0.528
	WRKY70	WRKY33	623849	618130	3702.AT3G56400.1	3702.AT2G38470.1	0	0	0	0.592	0.275	0	0	0.862	0.528
	SWI3A	MBD10	619108	609381	3702.AT2G47620.1	3702.AT1G15340.1	0	0	0	0	0	0	0	0.528	0.528
	AT5G13810	PRXQ	630000	621899	3702.AT5G13810.1	3702.AT3G26060.2	0	0	0	0	0	0	0	0.528	0.528
	ENH1	PSBQ-2	630351	625139	3702.AT5G17170.1	3702.AT4G05180.1	0	0	0	0	0.461	0	0	0.161	0.528
	PSBO2	AT3G47650	623254	622907	3702.AT3G50820.1	3702.AT3G47650.1	0	0	0	0	0.528	0	0	0	0.528
	NTRC	GLYR2	618481	609619	3702.AT2G41680.1	3702.AT1G17650.1	0.183	0	0	0	0.277	0	0	0.264	0.527
	AT1G56500	CYP97A3	612554	610986	3702.AT1G56500.1	3702.AT1G31800.1	0	0	0	0	0.524	0.048	0	0	0.527
	PSBO2	emb2184	623254	614342	3702.AT3G50820.1	3702.AT1G75350.1	0	0	0	0	0.527	0	0	0	0.527
	PRXQ	GLYR2	621899	609619	3702.AT3G26060.2	3702.AT1G17650.1	0	0	0	0	0.499	0	0	0.096	0.527
	HCF101	LQY1	621724	614373	3702.AT3G24430.1	3702.AT1G75690.1	0	0	0	0	0.527	0	0	0	0.527
	CaS	AT2G37660	630907	618044	3702.AT5G23060.1	3702.AT2G37660.1	0	0	0	0	0.527	0	0	0	0.527
	AT5G52970	TL29	633461	625316	3702.AT5G52970.1	3702.AT4G09010.1	0	0	0	0	0.527	0	0	0	0.527
	AT1G51110	AT1G04420	611974	608196	3702.AT1G51110.1	3702.AT1G04420.1	0	0	0	0	0.526	0	0	0	0.526
	PSBW	FNR2	617266	609854	3702.AT2G30570.1	3702.AT1G20020.1	0	0	0	0	0.526	0	0	0	0.526
	AT4G01150	AT2G37660	624737	618044	3702.AT4G01150.1	3702.AT2G37660.1	0	0	0	0	0.526	0	0	0	0.526
	AT4G33070	AT3G06950	627974	619837	3702.AT4G33070.1	3702.AT3G06950.1	0	0	0	0	0	0.048	0	0.523	0.526
	LQY1	AT1G14270	614373	609262	3702.AT1G75690.1	3702.AT1G14270.1	0	0	0	0	0.525	0	0	0	0.525
	AT5G58330	PSAO	634048	608627	3702.AT5G58330.1	3702.AT1G08380.1	0	0	0	0	0.525	0	0	0	0.525
	PSAL	TL29	625711	625316	3702.AT4G12800.1	3702.AT4G09010.1	0	0	0	0	0.516	0	0	0.06	0.525
	AT2G37660	LQY1	618044	614373	3702.AT2G37660.1	3702.AT1G75690.1	0	0	0	0	0.525	0	0	0	0.525
	AT3G47070	AT1G12250	622854	609050	3702.AT3G47070.1	3702.AT1G12250.1	0	0	0	0	0.524	0	0	0	0.524
	CSP41A	AT3G47650	624555	622907	3702.AT3G63140.1	3702.AT3G47650.1	0	0	0	0	0.524	0	0	0	0.524
	HCF136	LrgB	630913	611016	3702.AT5G23120.1	3702.AT1G32080.1	0	0	0	0	0.524	0	0	0	0.524
	FNR2	AT1G04420	609854	608196	3702.AT1G20020.1	3702.AT1G04420.1	0	0	0	0	0.508	0	0	0.072	0.524
	RBOHD	RIPK	632911	615363	3702.AT5G47910.1	3702.AT2G05940.1	0	0	0	0	0.34	0	0	0.307	0.523
	PSI-P	AT1G51110	619027	611974	3702.AT2G46820.1	3702.AT1G51110.1	0	0	0	0	0.523	0	0	0	0.523
	emb2726	SBPASE	627535	623790	3702.AT4G29060.1	3702.AT3G55800.1	0	0	0	0	0.523	0	0	0	0.523
	CRD1	PRXQ	623904	621899	3702.AT3G56940.1	3702.AT3G26060.2	0	0	0	0	0.523	0	0	0	0.523
	ENH1	AT1G51110	630351	611974	3702.AT5G17170.1	3702.AT1G51110.1	0	0	0	0	0.523	0	0	0	0.523
	TRX1	APL2	623277	610587	3702.AT3G51030.1	3702.AT1G27680.1	0	0	0	0	0	0.044	0	0.522	0.523
	PHB	PIN1	617724	614158	3702.AT2G34710.1	3702.AT1G73590.1	0	0	0	0	0.145	0	0	0.465	0.523
	LOX2	WRKY33	622651	618130	3702.AT3G45140.1	3702.AT2G38470.1	0	0	0	0	0	0	0	0.523	0.523
	emb2726	CYP97A3	627535	610986	3702.AT4G29060.1	3702.AT1G31800.1	0	0	0	0	0.506	0.072	0	0	0.522
	AT1G60000	GAPA-2	612742	609120	3702.AT1G60000.1	3702.AT1G12900.1	0	0	0	0	0.506	0.071	0	0	0.522
	PSAN	DAC	634646	621007	3702.AT5G64040.2	3702.AT3G17930.1	0	0	0	0	0.215	0	0	0.416	0.521
	EXPB3	EXPA15	627444	615124	3702.AT4G28250.1	3702.AT2G03090.1	0	0	0	0.765	0.405	0	0	0.841	0.521
	AT2G37660	GAPA-2	618044	609120	3702.AT2G37660.1	3702.AT1G12900.1	0	0	0	0	0.521	0	0	0	0.521
	AT1G60000	TLP18.3	612742	612371	3702.AT1G60000.1	3702.AT1G54780.1	0	0	0	0	0.521	0	0	0	0.521
	emb2726	SULA	627535	616306	3702.AT4G29060.1	3702.AT2G21280.1	0	0	0	0	0.52	0	0	0	0.52
	TRX-M4	PSBW	620727	617266	3702.AT3G15360.1	3702.AT2G30570.1	0	0	0	0	0.487	0	0	0.104	0.52
	PTL	KNAT6	629013	610211	3702.AT5G03680.1	3702.AT1G23380.2	0	0	0	0	0	0	0	0.52	0.52
	AT2G37660	LrgB	618044	611016	3702.AT2G37660.1	3702.AT1G32080.1	0.186	0	0	0	0.434	0	0	0	0.519
	AT2G37660	AT1G60000	618044	612742	3702.AT2G37660.1	3702.AT1G60000.1	0	0	0	0	0.519	0	0	0	0.519
	ENH1	AT3G47650	630351	622907	3702.AT5G17170.1	3702.AT3G47650.1	0	0	0	0	0.519	0	0	0	0.519
	AT4G27280	MKK9	627335	614150	3702.AT4G27280.1	3702.AT1G73500.1	0	0	0	0	0.5	0.048	0	0.071	0.519
	PETC	AT3G47650	624981	622907	3702.AT4G03280.1	3702.AT3G47650.1	0	0	0	0	0.519	0	0	0	0.519
	FBA2	TL29	628603	625316	3702.AT4G38970.1	3702.AT4G09010.1	0	0	0	0	0.463	0	0	0.139	0.517
	LQY1	AT1G60000	614373	612742	3702.AT1G75690.1	3702.AT1G60000.1	0	0	0	0	0.514	0	0	0.046	0.517
	AT5G52970	PSI-P	633461	619027	3702.AT5G52970.1	3702.AT2G46820.1	0	0	0	0	0.516	0	0	0	0.516
	TLP18.3	AT1G35420	612371	611307	3702.AT1G54780.1	3702.AT1G35420.2	0.082	0	0	0	0.494	0	0	0	0.516
	AT5G58330	PSI-P	634048	619027	3702.AT5G58330.1	3702.AT2G46820.1	0	0	0	0	0.516	0	0	0	0.516
	SBPASE	AT1G14270	623790	609262	3702.AT3G55800.1	3702.AT1G14270.1	0	0	0	0	0.516	0	0	0	0.516
	TRX1	GLX1	623277	609003	3702.AT3G51030.1	3702.AT1G11840.6	0	0	0	0	0.053	0.099	0	0.477	0.515
	AT5G52970	emb2726	633461	627535	3702.AT5G52970.1	3702.AT4G29060.1	0	0	0	0	0.514	0	0	0	0.514
	AT5G58330	AT1G57770	634048	612601	3702.AT5G58330.1	3702.AT1G57770.1	0	0	0	0	0.507	0	0	0.053	0.513
	PETC	SULA	624981	616306	3702.AT4G03280.1	3702.AT2G21280.1	0	0	0	0	0.513	0	0	0	0.513
	CYP94C1	LOX4	616972	614050	3702.AT2G27690.1	3702.AT1G72520.1	0	0	0	0	0.351	0	0	0.279	0.512
	AT5G58330	AT1G51110	634048	611974	3702.AT5G58330.1	3702.AT1G51110.1	0	0	0	0	0.51	0	0	0	0.51
	HCF101	emb2184	621724	614342	3702.AT3G24430.1	3702.AT1G75350.1	0.059	0	0	0	0.5	0	0	0	0.509
	PSAN	HCF136	634646	630913	3702.AT5G64040.2	3702.AT5G23120.1	0	0	0	0	0.509	0	0	0	0.509
	AT2G42220	PSBW	618539	617266	3702.AT2G42220.1	3702.AT2G30570.1	0	0	0	0	0.508	0	0	0	0.508
	AT4G01150	PSBW	624737	617266	3702.AT4G01150.1	3702.AT2G30570.1	0	0	0	0	0.508	0	0	0	0.508
	AT5G52970	ENH1	633461	630351	3702.AT5G52970.1	3702.AT5G17170.1	0	0	0	0	0.508	0	0	0	0.508
	FBA2	emb2184	628603	614342	3702.AT4G38970.1	3702.AT1G75350.1	0.19	0	0	0	0.417	0	0	0	0.508
	AT2G42220	RCA	618539	618258	3702.AT2G42220.1	3702.AT2G39730.1	0	0	0	0	0.508	0	0	0	0.508
	PXY	ATHB-15	634378	612083	3702.AT5G61480.1	3702.AT1G52150.2	0	0	0	0	0.12	0	0	0.464	0.508
	TRX1	AT1G56500	623277	612554	3702.AT3G51030.1	3702.AT1G56500.1	0	0	0	0	0	0.124	0	0.462	0.508
	AT2G42220	AT2G26500	618539	616844	3702.AT2G42220.1	3702.AT2G26500.1	0	0	0	0	0.507	0	0	0	0.507
	TRX-M4	RCA	620727	618258	3702.AT3G15360.1	3702.AT2G39730.1	0	0	0	0	0.423	0	0	0.181	0.507
	AT2G37660	AT1G57770	618044	612601	3702.AT2G37660.1	3702.AT1G57770.1	0.088	0	0.26	0	0.324	0	0	0.047	0.507
	AT3G47650	GAPA-2	622907	609120	3702.AT3G47650.1	3702.AT1G12900.1	0	0	0	0	0.507	0	0	0	0.507
	AT4G01150	AT2G42220	624737	618539	3702.AT4G01150.1	3702.AT2G42220.1	0	0	0	0	0.506	0	0	0	0.506
	SBPASE	AT1G60000	623790	612742	3702.AT3G55800.1	3702.AT1G60000.1	0	0	0	0	0.502	0.048	0	0	0.506
	ENH1	PSI-P	630351	619027	3702.AT5G17170.1	3702.AT2G46820.1	0	0	0	0	0.506	0	0	0	0.506
	AT1G60000	AT1G14270	612742	609262	3702.AT1G60000.1	3702.AT1G14270.1	0	0	0	0	0.506	0	0	0	0.506
	SHM1	AT2G42220	628497	618539	3702.AT4G37930.1	3702.AT2G42220.1	0	0	0	0	0.506	0	0	0	0.506
	CSP41A	AT2G37660	624555	618044	3702.AT3G63140.1	3702.AT2G37660.1	0	0	0	0	0.506	0	0	0	0.506
	NTRC	NUDX1	618481	613668	3702.AT2G41680.1	3702.AT1G68760.1	0.19	0	0	0	0	0	0	0.416	0.506
	XTH32	PUB17	617956	610737	3702.AT2G36870.1	3702.AT1G29340.1	0	0	0	0	0	0	0	0.505	0.505
	HSF3	PHO2	630314	617623	3702.AT5G16820.2	3702.AT2G33770.1	0	0	0	0	0	0.048	0	0.502	0.505
	PETC	AT1G60000	624981	612742	3702.AT4G03280.1	3702.AT1G60000.1	0	0	0	0	0.502	0.047	0	0	0.505
	TL29	AT4G01150	625316	624737	3702.AT4G09010.1	3702.AT4G01150.1	0	0	0	0	0.505	0	0	0	0.505
	OFP7	KNAT6	616005	610211	3702.AT2G18500.1	3702.AT1G23380.2	0	0	0	0	0.112	0	0	0.466	0.505
	emb2726	HPR	627535	613587	3702.AT4G29060.1	3702.AT1G68010.2	0.173	0	0	0	0.426	0	0	0	0.505
	PETC	MENG	624981	610210	3702.AT4G03280.1	3702.AT1G23360.1	0	0	0	0	0.253	0	0	0.364	0.505
	HCF136	AT1G04420	630913	608196	3702.AT5G23120.1	3702.AT1G04420.1	0	0	0	0	0.501	0	0	0.046	0.504
	AT2G26500	SULA	616844	616306	3702.AT2G26500.1	3702.AT2G21280.1	0	0	0	0	0.504	0	0	0	0.504
	SNAP33	ADR1-L1	634349	627997	3702.AT5G61210.1	3702.AT4G33300.2	0	0	0	0	0.465	0.043	0	0.108	0.503
	SHM1	TL29	628497	625316	3702.AT4G37930.1	3702.AT4G09010.1	0	0	0	0	0.503	0	0	0	0.503
	emb2184	PSAO	614342	608627	3702.AT1G75350.1	3702.AT1G08380.1	0	0	0	0	0.503	0	0	0	0.503
	AT3G47070	LHCB6	622854	609430	3702.AT3G47070.1	3702.AT1G15820.1	0	0	0	0	0.503	0	0	0	0.503
	TRX-M4	THIC	620727	617168	3702.AT3G15360.1	3702.AT2G29630.2	0	0	0	0	0.288	0	0	0.33	0.503
	HCF136	CYP97A3	630913	610986	3702.AT5G23120.1	3702.AT1G31800.1	0	0	0	0	0.499	0.048	0	0	0.502
	CSP41A	CRD1	624555	623904	3702.AT3G63140.1	3702.AT3G56940.1	0	0	0	0	0.502	0	0	0	0.502
	AT1G51110	AT1G12250	611974	609050	3702.AT1G51110.1	3702.AT1G12250.1	0	0	0	0	0.502	0	0	0	0.502
	CaS	FNR2	630907	609854	3702.AT5G23060.1	3702.AT1G20020.1	0	0	0	0	0.502	0	0	0	0.502
	AT2G37660	GLYR2	618044	609619	3702.AT2G37660.1	3702.AT1G17650.1	0	0	0	0	0.499	0	0	0.046	0.502
	AT2G42220	AT1G60000	618539	612742	3702.AT2G42220.1	3702.AT1G60000.1	0	0	0	0	0.502	0	0	0	0.502
	HCF136	TRX-M4	630913	620727	3702.AT5G23120.1	3702.AT3G15360.1	0	0	0	0	0.499	0	0	0.048	0.502
	SHM1	CYP97A3	628497	610986	3702.AT4G37930.1	3702.AT1G31800.1	0	0	0	0	0.502	0	0	0	0.502
	AT5G52970	SBPASE	633461	623790	3702.AT5G52970.1	3702.AT3G55800.1	0	0	0	0	0.502	0	0	0	0.502
	HPR	AT1G60000	613587	612742	3702.AT1G68010.2	3702.AT1G60000.1	0	0	0	0	0.499	0.048	0	0	0.502
	CaS	PSBW	630907	617266	3702.AT5G23060.1	3702.AT2G30570.1	0	0	0	0	0.501	0	0	0	0.501
	AT5G58330	HCF101	634048	621724	3702.AT5G58330.1	3702.AT3G24430.1	0	0	0	0	0.464	0	0	0.108	0.501
	PSBO2	SULA	623254	616306	3702.AT3G50820.1	3702.AT2G21280.1	0	0	0	0	0.5	0	0	0	0.5
	CYP97A3	FNR2	610986	609854	3702.AT1G31800.1	3702.AT1G20020.1	0	0	0	0	0.477	0.048	0	0.078	0.5
	CSP41A	PSBW	624555	617266	3702.AT3G63140.1	3702.AT2G30570.1	0	0	0	0	0.5	0	0	0	0.5
	AT5G58330	AT1G04420	634048	608196	3702.AT5G58330.1	3702.AT1G04420.1	0	0	0	0	0.496	0	0	0.048	0.5
	AT5G52970	AT1G60000	633461	612742	3702.AT5G52970.1	3702.AT1G60000.1	0	0	0	0	0.5	0	0	0	0.5
	GATL10	WRKY33	622158	618130	3702.AT3G28340.1	3702.AT2G38470.1	0	0	0	0	0.5	0	0	0	0.499
	UGT88A1	LHCB4.2	620852	620000	3702.AT3G16520.3	3702.AT3G08940.2	0	0	0	0	0.5	0	0	0	0.499
	AT3G59080	AT1G23710	624123	610241	3702.AT3G59080.1	3702.AT1G23710.1	0	0	0	0	0.499	0	0	0	0.499
	LQY1	AT1G35420	614373	611307	3702.AT1G75690.1	3702.AT1G35420.2	0	0	0	0	0.499	0	0	0	0.499
	AT1G56500	AT1G18060	612554	609659	3702.AT1G56500.1	3702.AT1G18060.1	0	0	0	0	0.499	0	0	0	0.499
	RAC3	EBP	628186	620880	3702.AT4G35020.2	3702.AT3G16770.1	0	0	0	0	0	0	0	0.499	0.499
	TRX-M4	AT3G15110	620727	620694	3702.AT3G15360.1	3702.AT3G15110.1	0	0	0	0	0.5	0	0	0	0.499
	AT3G47650	TRX-M4	622907	620727	3702.AT3G47650.1	3702.AT3G15360.1	0	0	0	0	0.499	0	0	0	0.499
	AT3G47070	AT2G42220	622854	618539	3702.AT3G47070.1	3702.AT2G42220.1	0	0	0	0	0.5	0	0	0	0.499
	TRX-M4	AT2G26500	620727	616844	3702.AT3G15360.1	3702.AT2G26500.1	0	0	0	0	0.5	0	0	0	0.499
	HSFA4A	BCS1	626431	623267	3702.AT4G18880.1	3702.AT3G50930.1	0	0	0	0	0.5	0	0	0	0.499
	AT3G47650	HPR	622907	613587	3702.AT3G47650.1	3702.AT1G68010.2	0	0	0	0	0.5	0	0	0	0.499
	PETC	AT1G18060	624981	609659	3702.AT4G03280.1	3702.AT1G18060.1	0	0	0	0	0.499	0	0	0	0.499
	HCF136	DAC	630913	621007	3702.AT5G23120.1	3702.AT3G17930.1	0	0	0	0	0.26	0	0	0.351	0.499
	AT5G16030	AT2G42220	630230	618539	3702.AT5G16030.3	3702.AT2G42220.1	0	0	0	0	0.5	0	0	0	0.499
	TL29	AT3G47070	625316	622854	3702.AT4G09010.1	3702.AT3G47070.1	0	0	0	0	0.499	0	0	0	0.499
	PSBO2	AT1G18060	623254	609659	3702.AT3G50820.1	3702.AT1G18060.1	0	0	0	0	0.499	0	0	0	0.499
	HCF101	HPR	621724	613587	3702.AT3G24430.1	3702.AT1G68010.2	0	0	0	0	0.499	0	0	0	0.499
	FBA2	TRX-M4	628603	620727	3702.AT4G38970.1	3702.AT3G15360.1	0	0	0	0	0.499	0	0	0	0.499
	AT5G52970	AT3G47070	633461	622854	3702.AT5G52970.1	3702.AT3G47070.1	0	0	0	0	0.499	0	0	0	0.499
	BCS1	LOX4	623267	614050	3702.AT3G50930.1	3702.AT1G72520.1	0	0	0	0	0.499	0	0	0	0.499
	CRD1	UGT88A1	623904	620852	3702.AT3G56940.1	3702.AT3G16520.3	0	0	0	0	0.499	0	0	0	0.499
	AT3G47650	PSAH2	622907	612091	3702.AT3G47650.1	3702.AT1G52230.1	0	0	0	0	0.5	0	0	0	0.499
	AT5G52970	HPR	633461	613587	3702.AT5G52970.1	3702.AT1G68010.2	0	0	0	0	0.499	0	0	0	0.499
	AT3G47070	AT1G56500	622854	612554	3702.AT3G47070.1	3702.AT1G56500.1	0	0	0	0	0.5	0	0	0	0.499
	TRX-M4	AT1G51110	620727	611974	3702.AT3G15360.1	3702.AT1G51110.1	0	0	0	0	0.499	0	0	0	0.499
	AT1G18060	GAPA-2	609659	609120	3702.AT1G18060.1	3702.AT1G12900.1	0	0	0	0	0.499	0	0	0	0.499
	AT4G27280	BCS1	627335	623267	3702.AT4G27280.1	3702.AT3G50930.1	0	0	0	0	0.499	0	0	0	0.499
	AT3G47650	AT2G42220	622907	618539	3702.AT3G47650.1	3702.AT2G42220.1	0	0	0	0	0.499	0	0	0	0.499
	TRX-M4	LHCB6	620727	609430	3702.AT3G15360.1	3702.AT1G15820.1	0	0	0	0	0.464	0	0	0.103	0.499
	AT5G52970	AT1G12250	633461	609050	3702.AT5G52970.1	3702.AT1G12250.1	0	0	0	0	0.5	0	0	0	0.499
	SVB	TLP8	612564	609458	3702.AT1G56580.1	3702.AT1G16070.2	0	0	0	0	0	0	0	0.5	0.499
	MYB15	LOX4	621596	614050	3702.AT3G23250.1	3702.AT1G72520.1	0	0	0	0	0.422	0	0	0.17	0.499
	PRXQ	AT3G15110	621899	620694	3702.AT3G26060.2	3702.AT3G15110.1	0	0	0	0	0.499	0	0	0	0.499
	LrgB	AT1G18060	611016	609659	3702.AT1G32080.1	3702.AT1G18060.1	0	0	0	0	0.499	0	0	0	0.499
	PSBQ-2	emb2184	625139	614342	3702.AT4G05180.1	3702.AT1G75350.1	0	0	0	0	0.498	0	0	0	0.498
	TRX-M4	AT1G04420	620727	608196	3702.AT3G15360.1	3702.AT1G04420.1	0	0	0	0	0.394	0.05	0	0.198	0.498
	TL29	AT1G56500	625316	612554	3702.AT4G09010.1	3702.AT1G56500.1	0	0	0	0	0.464	0	0	0.103	0.498
	AT5G58330	emb2184	634048	614342	3702.AT5G58330.1	3702.AT1G75350.1	0.19	0	0	0	0.406	0	0	0	0.498
	emb2726	PSI-P	627535	619027	3702.AT4G29060.1	3702.AT2G46820.1	0	0	0	0	0.431	0	0	0.153	0.498
	AT2G31040	AT1G51110	617320	611974	3702.AT2G31040.1	3702.AT1G51110.1	0	0	0	0	0.498	0	0	0	0.497
	PSBQ-2	THIC	625139	617168	3702.AT4G05180.1	3702.AT2G29630.2	0	0	0	0	0.341	0	0	0.268	0.496
	AT2G42220	SCL3	618539	611904	3702.AT2G42220.1	3702.AT1G50420.1	0	0	0	0	0	0	0	0.496	0.495
	PRXQ	CYP97A3	621899	610986	3702.AT3G26060.2	3702.AT1G31800.1	0	0	0	0	0.496	0	0	0	0.495
	AT3G47650	AT3G15110	622907	620694	3702.AT3G47650.1	3702.AT3G15110.1	0	0	0	0	0.494	0	0	0	0.494
	APT5	AT1G19600	629765	609813	3702.AT5G11160.1	3702.AT1G19600.1	0	0	0	0	0.045	0.103	0	0.457	0.494
	SBPASE	AT1G04420	623790	608196	3702.AT3G55800.1	3702.AT1G04420.1	0	0	0	0	0.47	0	0	0.085	0.494
	ERF-1	ATL2	626271	620875	3702.AT4G17500.1	3702.AT3G16720.1	0	0	0	0	0.494	0	0	0	0.494
	CSP41A	AT1G12250	624555	609050	3702.AT3G63140.1	3702.AT1G12250.1	0	0	0	0	0.494	0	0	0	0.494
	CRD1	AT1G18060	623904	609659	3702.AT3G56940.1	3702.AT1G18060.1	0	0	0	0	0.493	0	0	0	0.493
	LAC5	MP	618336	609837	3702.AT2G40370.1	3702.AT1G19850.1	0	0	0	0	0	0	0	0.494	0.493
	emb2726	CSP41A	627535	624555	3702.AT4G29060.1	3702.AT3G63140.1	0	0	0	0	0.493	0	0	0	0.493
	AT2G37660	PSAH2	618044	612091	3702.AT2G37660.1	3702.AT1G52230.1	0	0	0	0	0.492	0	0	0	0.492
	AT1G57770	PSAO	612601	608627	3702.AT1G57770.1	3702.AT1G08380.1	0	0	0	0	0.421	0	0	0.159	0.492
	CaS	NTRC	630907	618481	3702.AT5G23060.1	3702.AT2G41680.1	0	0	0	0	0.38	0	0	0.215	0.492
	CSP41A	AT1G35420	624555	611307	3702.AT3G63140.1	3702.AT1G35420.2	0	0	0	0	0.492	0	0	0	0.492
	SULA	HPR	616306	613587	3702.AT2G21280.1	3702.AT1G68010.2	0	0	0	0	0.489	0	0	0.046	0.491
	AT3G47650	FNR2	622907	609854	3702.AT3G47650.1	3702.AT1G20020.1	0	0	0	0	0.491	0	0	0	0.491
	AT3G47650	HCF101	622907	621724	3702.AT3G47650.1	3702.AT3G24430.1	0	0	0	0	0.492	0	0	0	0.491
	TLP18.3	AT1G04420	612371	608196	3702.AT1G54780.1	3702.AT1G04420.1	0	0	0	0	0.491	0	0	0	0.491
	AT5G58330	PSAH2	634048	612091	3702.AT5G58330.1	3702.AT1G52230.1	0	0	0	0	0.491	0	0	0	0.491
	HPR	AT1G14270	613587	609262	3702.AT1G68010.2	3702.AT1G14270.1	0	0	0	0	0.49	0	0	0	0.49
	CSP41A	AT1G57770	624555	612601	3702.AT3G63140.1	3702.AT1G57770.1	0	0	0	0	0.49	0	0	0	0.49
	emb2726	LQY1	627535	614373	3702.AT4G29060.1	3702.AT1G75690.1	0	0	0	0	0.489	0	0	0	0.489
	At5g17990	DHS1	630437	628711	3702.AT5G17990.1	3702.AT4G39980.1	0.19	0	0	0	0.207	0	0	0.269	0.489
	PBRP	AT1G63100	628358	613063	3702.AT4G36650.1	3702.AT1G63100.1	0	0	0	0	0	0	0	0.489	0.489
	AT5G58330	AT1G56500	634048	612554	3702.AT5G58330.1	3702.AT1G56500.1	0	0	0	0	0.423	0	0	0.15	0.489
	emb2184	AT1G51110	614342	611974	3702.AT1G75350.1	3702.AT1G51110.1	0	0	0	0	0.49	0	0	0	0.489
	AT5G17350	AT4G27280	630371	627335	3702.AT5G17350.1	3702.AT4G27280.1	0	0	0	0	0.489	0	0	0	0.489
	HCF136	AT4G01150	630913	624737	3702.AT5G23120.1	3702.AT4G01150.1	0	0	0	0	0.489	0	0	0	0.489
	AT1G57770	CRB	612601	608726	3702.AT1G57770.1	3702.AT1G09340.1	0	0	0	0	0.488	0	0	0	0.488
	APG3	PRXQ	624529	621899	3702.AT3G62910.1	3702.AT3G26060.2	0.061	0	0	0	0.478	0	0	0	0.488
	FBA2	AT3G47650	628603	622907	3702.AT4G38970.1	3702.AT3G47650.1	0	0	0	0	0.488	0	0	0	0.488
	CT-BMY	AT2G26500	626232	616844	3702.AT4G17090.1	3702.AT2G26500.1	0	0	0	0	0.219	0	0	0.371	0.487
	PETC	AT1G35420	624981	611307	3702.AT4G03280.1	3702.AT1G35420.2	0	0	0	0	0.486	0	0	0	0.486
	emb2184	AT1G12250	614342	609050	3702.AT1G75350.1	3702.AT1G12250.1	0.175	0	0	0	0.403	0	0	0	0.486
	ENH1	LrgB	630351	611016	3702.AT5G17170.1	3702.AT1G32080.1	0	0	0	0	0.486	0	0	0	0.486
	PRXQ	AT1G57770	621899	612601	3702.AT3G26060.2	3702.AT1G57770.1	0.059	0	0	0	0.476	0	0	0	0.486
	PTAC5	SBPASE	625808	623790	3702.AT4G13670.1	3702.AT3G55800.1	0	0	0	0	0.366	0	0	0.222	0.486
	PTL	ANT	629013	628478	3702.AT5G03680.1	3702.AT4G37750.1	0	0	0	0	0.086	0	0	0.46	0.485
	PSI-P	AT2G37660	619027	618044	3702.AT2G46820.1	3702.AT2G37660.1	0	0	0	0	0.485	0	0	0	0.485
	THIC	AT1G35420	617168	611307	3702.AT2G29630.2	3702.AT1G35420.2	0	0	0	0	0.485	0	0	0	0.485
	AT1G35420	AT1G12250	611307	609050	3702.AT1G35420.2	3702.AT1G12250.1	0.113	0	0	0	0.444	0	0	0	0.485
	AT3G47070	AT1G51110	622854	611974	3702.AT3G47070.1	3702.AT1G51110.1	0	0	0	0	0.486	0	0	0	0.485
	LrgB	AT1G04420	611016	608196	3702.AT1G32080.1	3702.AT1G04420.1	0.093	0	0	0	0.455	0	0	0	0.485
	emb2726	AT1G14270	627535	609262	3702.AT4G29060.1	3702.AT1G14270.1	0.057	0	0	0	0.476	0	0	0	0.485
	RCA	AT1G56500	618258	612554	3702.AT2G39730.1	3702.AT1G56500.1	0.094	0	0	0	0.416	0.099	0	0.048	0.485
	TRX-M4	PSAO	620727	608627	3702.AT3G15360.1	3702.AT1G08380.1	0	0	0	0	0.485	0	0	0	0.485
	AT1G56500	AT1G04420	612554	608196	3702.AT1G56500.1	3702.AT1G04420.1	0.073	0	0	0	0.43	0.102	0	0.043	0.485
	TRX-M4	SULA	620727	616306	3702.AT3G15360.1	3702.AT2G21280.1	0	0	0	0	0.483	0	0	0	0.483
	SWEET17	AT2G26500	626088	616844	3702.AT4G15920.1	3702.AT2G26500.1	0	0	0	0	0	0	0	0.484	0.483
	AT5G52970	CaS	633461	630907	3702.AT5G52970.1	3702.AT5G23060.1	0	0	0	0	0.484	0	0	0	0.483
	PSAN	AT3G47650	634646	622907	3702.AT5G64040.2	3702.AT3G47650.1	0	0	0	0	0.484	0	0	0	0.483
	AT5G17350	AT1G23710	630371	610241	3702.AT5G17350.1	3702.AT1G23710.1	0	0	0	0	0.483	0	0	0	0.483
	AT1G60000	AT1G56500	612742	612554	3702.AT1G60000.1	3702.AT1G56500.1	0	0	0	0	0.415	0.152	0	0	0.483
	AO	PSBQ-2	630099	625139	3702.AT5G14760.1	3702.AT4G05180.1	0	0	0	0	0	0	0	0.482	0.482
	SHM1	AT3G18680	628497	621091	3702.AT4G37930.1	3702.AT3G18680.1	0.182	0	0	0	0.198	0	0	0.273	0.482
	HSFA4A	MYB15	626431	621596	3702.AT4G18880.1	3702.AT3G23250.1	0	0	0	0	0.275	0.126	0	0.247	0.481
	TL29	AT3G47650	625316	622907	3702.AT4G09010.1	3702.AT3G47650.1	0	0	0	0	0.481	0	0	0	0.481
	HSFA4A	AT2G41640	626431	618477	3702.AT4G18880.1	3702.AT2G41640.1	0	0	0	0	0.481	0	0	0	0.481
	HCF136	PSAO	630913	608627	3702.AT5G23120.1	3702.AT1G08380.1	0	0	0	0	0.48	0	0	0	0.48
	AT5G58330	AT1G14270	634048	609262	3702.AT5G58330.1	3702.AT1G14270.1	0.06	0	0	0	0.463	0	0	0.053	0.48
	PSBO2	AT2G31040	623254	617320	3702.AT3G50820.1	3702.AT2G31040.1	0	0	0	0	0.279	0	0	0.309	0.48
	AT5G58330	AT1G60000	634048	612742	3702.AT5G58330.1	3702.AT1G60000.1	0	0	0	0	0.467	0.064	0	0	0.48
	AT1G57770	GAPA-2	612601	609120	3702.AT1G57770.1	3702.AT1G12900.1	0	0	0	0	0.434	0	0	0.119	0.48
	emb2726	TL29	627535	625316	3702.AT4G29060.1	3702.AT4G09010.1	0	0	0	0	0.479	0	0	0	0.479
	AT3G47650	LrgB	622907	611016	3702.AT3G47650.1	3702.AT1G32080.1	0	0	0	0	0.479	0	0	0	0.479
	AT1G35420	GAPA-2	611307	609120	3702.AT1G35420.2	3702.AT1G12900.1	0	0	0	0	0.479	0	0	0	0.479
	ENH1	FBA2	630351	628603	3702.AT5G17170.1	3702.AT4G38970.1	0	0	0	0	0.478	0	0	0	0.478
	HCF136	CRD1	630913	623904	3702.AT5G23120.1	3702.AT3G56940.1	0	0	0	0	0.478	0	0	0	0.478
	HCF136	LHCB6	630913	609430	3702.AT5G23120.1	3702.AT1G15820.1	0	0	0	0	0.418	0	0	0.141	0.478
	emb2726	AT1G04420	627535	608196	3702.AT4G29060.1	3702.AT1G04420.1	0	0	0	0	0.478	0	0	0	0.478
	TLP18.3	AT1G14270	612371	609262	3702.AT1G54780.1	3702.AT1G14270.1	0.058	0	0	0	0.468	0	0	0	0.477
	AT4G27280	AT3G59080	627335	624123	3702.AT4G27280.1	3702.AT3G59080.1	0	0	0	0	0.476	0.043	0	0	0.477
	GATL10	AT2G41640	622158	618477	3702.AT3G28340.1	3702.AT2G41640.1	0	0	0	0	0.477	0	0	0	0.477
	AT4G01150	HCF101	624737	621724	3702.AT4G01150.1	3702.AT3G24430.1	0	0	0	0	0.477	0	0	0	0.477
	AT5G58330	AT3G47070	634048	622854	3702.AT5G58330.1	3702.AT3G47070.1	0	0	0	0	0.476	0	0	0	0.476
	AT1G57770	AT1G35420	612601	611307	3702.AT1G57770.1	3702.AT1G35420.2	0.145	0	0	0	0.413	0	0	0	0.476
	TL29	AT1G04420	625316	608196	3702.AT4G09010.1	3702.AT1G04420.1	0	0	0	0	0.476	0	0	0	0.476
	KNAT1	PHB	625227	617724	3702.AT4G08150.1	3702.AT2G34710.1	0	0	0	0	0.068	0	0	0.461	0.476
	ENH1	AT4G01150	630351	624737	3702.AT5G17170.1	3702.AT4G01150.1	0	0	0	0	0.453	0	0	0.079	0.475
	PXY	MP	634378	609837	3702.AT5G61480.1	3702.AT1G19850.1	0	0	0	0	0.062	0	0	0.464	0.475
	WRKY48	WRKY33	633090	618130	3702.AT5G49520.1	3702.AT2G38470.1	0	0	0	0.673	0.341	0	0	0.641	0.475
	ENH1	AT1G57770	630351	612601	3702.AT5G17170.1	3702.AT1G57770.1	0	0	0	0	0.475	0	0	0	0.475
	emb2726	PSBO2	627535	623254	3702.AT4G29060.1	3702.AT3G50820.1	0	0	0	0	0.456	0	0	0.073	0.474
	PSAL	AT1G35420	625711	611307	3702.AT4G12800.1	3702.AT1G35420.2	0	0	0	0	0.474	0	0	0	0.474
	PSI-P	AT1G04420	619027	608196	3702.AT2G46820.1	3702.AT1G04420.1	0	0	0	0	0.474	0	0	0	0.474
	APE2	AT3G47070	632718	622854	3702.AT5G46110.4	3702.AT3G47070.1	0	0	0	0	0.474	0	0	0	0.474
	HSFA4A	ATL2	626431	620875	3702.AT4G18880.1	3702.AT3G16720.1	0	0	0	0	0.473	0	0	0	0.473
	GAPA-2	AT1G04420	609120	608196	3702.AT1G12900.1	3702.AT1G04420.1	0	0	0	0	0.473	0	0	0	0.473
	PSBQ-2	AT1G51110	625139	611974	3702.AT4G05180.1	3702.AT1G51110.1	0	0	0	0	0.472	0	0	0	0.472
	PETC	AT1G51110	624981	611974	3702.AT4G03280.1	3702.AT1G51110.1	0	0	0	0	0.472	0	0	0	0.472
	TL29	LHCB4.2	625316	620000	3702.AT4G09010.1	3702.AT3G08940.2	0	0	0	0	0.472	0	0	0	0.472
	AT2G42220	LrgB	618539	611016	3702.AT2G42220.1	3702.AT1G32080.1	0	0	0	0	0.472	0	0	0	0.472
	CaS	AT1G04420	630907	608196	3702.AT5G23060.1	3702.AT1G04420.1	0	0	0	0	0.472	0	0	0	0.472
	AT3G15110	SULA	620694	616306	3702.AT3G15110.1	3702.AT2G21280.1	0	0	0	0	0.472	0	0	0	0.472
	CT-BMY	SWEET17	626232	626088	3702.AT4G17090.1	3702.AT4G15920.1	0	0	0	0	0	0	0	0.472	0.472
	ARASP	emb2184	617479	614342	3702.AT2G32480.1	3702.AT1G75350.1	0.19	0	0.21	0	0.241	0	0	0	0.471
	AT2G37660	CYP97A3	618044	610986	3702.AT2G37660.1	3702.AT1G31800.1	0	0	0	0	0.471	0	0	0	0.471
	AT5G58330	TL29	634048	625316	3702.AT5G58330.1	3702.AT4G09010.1	0	0	0	0	0.471	0	0	0	0.471
	AT1G14270	AT1G12250	609262	609050	3702.AT1G14270.1	3702.AT1G12250.1	0	0	0	0	0.471	0	0	0	0.471
	SVP	PHYA	616433	608751	3702.AT2G22540.1	3702.AT1G09570.1	0	0	0	0	0	0	0	0.471	0.471
	AT1G57770	GA2OX6	612601	607989	3702.AT1G57770.1	3702.AT1G02400.1	0	0	0	0	0	0	0	0.471	0.471
	AT2G26500	AT1G35420	616844	611307	3702.AT2G26500.1	3702.AT1G35420.2	0	0	0	0	0.47	0	0	0	0.47
	ENH1	PSBW	630351	617266	3702.AT5G17170.1	3702.AT2G30570.1	0	0	0	0	0.47	0	0	0	0.47
	AT5G58330	PSAL	634048	625711	3702.AT5G58330.1	3702.AT4G12800.1	0	0	0	0	0.452	0	0	0.072	0.47
	AT3G18680	GAPA-2	621091	609120	3702.AT3G18680.1	3702.AT1G12900.1	0	0	0	0	0.328	0	0	0.244	0.47
	THIC	FNR2	617168	609854	3702.AT2G29630.2	3702.AT1G20020.1	0	0	0	0	0.459	0	0	0.06	0.47
	CRD1	AT1G51110	623904	611974	3702.AT3G56940.1	3702.AT1G51110.1	0	0	0	0	0.47	0	0	0	0.47
	SULA	AT1G60000	616306	612742	3702.AT2G21280.1	3702.AT1G60000.1	0	0	0	0	0.469	0	0	0	0.469
	PRXQ	LHCB4.2	621899	620000	3702.AT3G26060.2	3702.AT3G08940.2	0	0	0	0	0.4	0	0	0.151	0.469
	AT1G56500	FNR2	612554	609854	3702.AT1G56500.1	3702.AT1G20020.1	0	0	0	0	0.469	0	0	0	0.469
	AT1G60000	CRB	612742	608726	3702.AT1G60000.1	3702.AT1G09340.1	0	0	0	0	0.469	0	0	0	0.469
	PRXQ	PSAO	621899	608627	3702.AT3G26060.2	3702.AT1G08380.1	0	0	0	0	0.469	0	0	0	0.469
	AT1G57770	LrgB	612601	611016	3702.AT1G57770.1	3702.AT1G32080.1	0	0	0	0	0.468	0	0	0	0.468
	ERF4	LOX4	620706	614050	3702.AT3G15210.1	3702.AT1G72520.1	0	0	0	0	0.249	0	0	0.321	0.468
	AT5G58330	LrgB	634048	611016	3702.AT5G58330.1	3702.AT1G32080.1	0	0	0	0	0.468	0	0	0	0.468
	PXY	LHW	634378	616924	3702.AT5G61480.1	3702.AT2G27230.2	0	0	0	0	0.055	0	0	0.461	0.468
	ERF4	AT1G23710	620706	610241	3702.AT3G15210.1	3702.AT1G23710.1	0	0	0	0	0.468	0	0	0	0.468
	AO	NTRC	630099	618481	3702.AT5G14760.1	3702.AT2G41680.1	0.19	0	0	0	0	0	0	0.371	0.468
	ADR1-L1	AT4G08850	627997	625294	3702.AT4G33300.2	3702.AT4G08850.1	0	0	0	0	0.407	0	0	0.141	0.468
	PSBO2	AT1G35420	623254	611307	3702.AT3G50820.1	3702.AT1G35420.2	0	0	0	0	0.464	0	0	0.046	0.467
	AT5G11420	EXO	629793	625310	3702.AT5G11420.1	3702.AT4G08950.1	0	0	0	0	0.047	0	0	0.464	0.467
	emb2726	AT3G06950	627535	619837	3702.AT4G29060.1	3702.AT3G06950.1	0.149	0	0	0	0.18	0.259	0	0.091	0.467
	APG3	AT2G37660	624529	618044	3702.AT3G62910.1	3702.AT2G37660.1	0	0	0	0	0.45	0	0	0.072	0.467
	TL29	PETC	625316	624981	3702.AT4G09010.1	3702.AT4G03280.1	0	0	0	0	0.467	0	0	0	0.467
	AT5G52970	LrgB	633461	611016	3702.AT5G52970.1	3702.AT1G32080.1	0	0	0	0	0.467	0	0	0	0.467
	CSP41A	LHCB4.2	624555	620000	3702.AT3G63140.1	3702.AT3G08940.2	0	0	0	0	0.467	0	0	0	0.467
	AT3G59080	STZ	624123	610593	3702.AT3G59080.1	3702.AT1G27730.1	0	0	0	0	0.467	0	0	0	0.467
	AT5G58330	PSBW	634048	617266	3702.AT5G58330.1	3702.AT2G30570.1	0	0	0	0	0.444	0	0	0.081	0.467
	TL29	CYP97A3	625316	610986	3702.AT4G09010.1	3702.AT1G31800.1	0	0	0	0	0.467	0	0	0	0.467
	AT3G18680	SVR1	621091	618197	3702.AT3G18680.1	3702.AT2G39140.1	0.182	0	0	0	0.374	0	0	0	0.466
	ERF4	FBS1	620706	612876	3702.AT3G15210.1	3702.AT1G61340.2	0	0	0	0	0.348	0	0	0.215	0.466
	AT4G01150	LrgB	624737	611016	3702.AT4G01150.1	3702.AT1G32080.1	0	0	0	0	0.466	0	0	0	0.466
	IAA27	AT4G21620	627537	626717	3702.AT4G29080.1	3702.AT4G21620.1	0	0	0	0	0	0	0	0.465	0.465
	APE2	PCK1	632718	628490	3702.AT5G46110.4	3702.AT4G37870.1	0	0	0	0	0.049	0	0	0.461	0.465
	AT3G47070	HCF101	622854	621724	3702.AT3G47070.1	3702.AT3G24430.1	0	0	0	0	0.466	0	0	0	0.465
	NTRC	AT1G14270	618481	609262	3702.AT2G41680.1	3702.AT1G14270.1	0.14	0	0	0	0.404	0	0	0	0.465
	APG3	LrgB	624529	611016	3702.AT3G62910.1	3702.AT1G32080.1	0.125	0	0	0	0.404	0	0	0.058	0.465
	APG3	AT1G04420	624529	608196	3702.AT3G62910.1	3702.AT1G04420.1	0	0	0	0	0.465	0	0	0	0.465
	AT1G72250	AT1G63100	614024	613063	3702.AT1G72250.2	3702.AT1G63100.1	0	0	0	0	0.464	0	0	0	0.464
	HCF136	PSAH2	630913	612091	3702.AT5G23120.1	3702.AT1G52230.1	0	0	0	0	0.46	0	0	0.049	0.464
	AT5G52970	APG3	633461	624529	3702.AT5G52970.1	3702.AT3G62910.1	0	0	0	0	0.464	0	0	0	0.464
	AT5G62350	sks5	634468	614419	3702.AT5G62350.1	3702.AT1G76160.1	0	0	0	0	0.048	0	0	0.461	0.464
	PDX2	NTRC	634277	618481	3702.AT5G60540.1	3702.AT2G41680.1	0	0	0	0	0.08	0	0	0.442	0.464
	PRXQ	AT1G35420	621899	611307	3702.AT3G26060.2	3702.AT1G35420.2	0	0	0	0	0.464	0	0	0	0.464
	MGD1	LHCB6	627830	609430	3702.AT4G31780.2	3702.AT1G15820.1	0	0	0	0	0.117	0	0	0.418	0.464
	BLH1	KNAT6	617855	610211	3702.AT2G35940.3	3702.AT1G23380.2	0	0	0	0.59	0	0.264	0	0.677	0.464
	PTAC5	AT4G01150	625808	624737	3702.AT4G13670.1	3702.AT4G01150.1	0	0	0	0	0.346	0	0	0.214	0.464
	AT1G60000	AT1G35420	612742	611307	3702.AT1G60000.1	3702.AT1G35420.2	0	0	0	0	0.464	0	0	0	0.464
	PSAH2	AT1G18060	612091	609659	3702.AT1G52230.1	3702.AT1G18060.1	0	0	0	0	0.464	0	0	0	0.463
	AT3G47070	AT1G35420	622854	611307	3702.AT3G47070.1	3702.AT1G35420.2	0	0	0	0	0.464	0	0	0	0.463
	TRX-M4	LrgB	620727	611016	3702.AT3G15360.1	3702.AT1G32080.1	0	0	0	0	0.464	0	0	0	0.463
	HCF101	AT1G60000	621724	612742	3702.AT3G24430.1	3702.AT1G60000.1	0	0	0	0	0.463	0	0	0	0.463
	RBOHD	AO	632911	630099	3702.AT5G47910.1	3702.AT5G14760.1	0	0	0	0	0	0	0	0.464	0.463
	PSAN	LrgB	634646	611016	3702.AT5G64040.2	3702.AT1G32080.1	0	0	0	0	0.464	0	0	0	0.463
	CaS	AT1G35420	630907	611307	3702.AT5G23060.1	3702.AT1G35420.2	0	0	0	0	0.464	0	0	0	0.463
	AT3G47650	AT1G51110	622907	611974	3702.AT3G47650.1	3702.AT1G51110.1	0	0	0	0	0.463	0	0	0	0.463
	ATL2	AT2G41640	620875	618477	3702.AT3G16720.1	3702.AT2G41640.1	0	0	0	0	0.464	0	0	0	0.463
	AT5G52970	GAPA-2	633461	609120	3702.AT5G52970.1	3702.AT1G12900.1	0	0	0	0	0.464	0	0	0	0.463
	AT1G57770	AT1G56500	612601	612554	3702.AT1G57770.1	3702.AT1G56500.1	0	0	0	0	0.463	0	0	0	0.463
	HCF101	AT1G18060	621724	609659	3702.AT3G24430.1	3702.AT1G18060.1	0	0	0	0	0.464	0	0	0	0.463
	HCF136	AT2G42220	630913	618539	3702.AT5G23120.1	3702.AT2G42220.1	0	0	0	0	0.463	0	0	0	0.463
	AT5G52970	AT1G18060	633461	609659	3702.AT5G52970.1	3702.AT1G18060.1	0	0	0	0	0.464	0	0	0	0.463
	HCF136	AT1G35420	630913	611307	3702.AT5G23120.1	3702.AT1G35420.2	0	0	0	0	0.464	0	0	0	0.463
	AT5G52970	AT3G15110	633461	620694	3702.AT5G52970.1	3702.AT3G15110.1	0	0	0	0	0.464	0	0	0	0.463
	SHM1	APG3	628497	624529	3702.AT4G37930.1	3702.AT3G62910.1	0.172	0	0	0	0.287	0	0	0.164	0.463
	AO	GAPA-2	630099	609120	3702.AT5G14760.1	3702.AT1G12900.1	0	0	0	0	0.117	0	0	0.416	0.462
	SVR1	emb2184	618197	614342	3702.AT2G39140.1	3702.AT1G75350.1	0.19	0	0	0	0.165	0	0	0.269	0.462
	NTRC	LrgB	618481	611016	3702.AT2G41680.1	3702.AT1G32080.1	0	0	0	0	0.462	0	0	0	0.462
	AT4G01150	DAC	624737	621007	3702.AT4G01150.1	3702.AT3G17930.1	0	0	0.203	0	0.34	0	0	0.059	0.462
	ENH1	LHCB4.2	630351	620000	3702.AT5G17170.1	3702.AT3G08940.2	0	0	0	0	0.462	0	0	0	0.462
	PDX2	SHM1	634277	628497	3702.AT5G60540.1	3702.AT4G37930.1	0	0	0	0	0.057	0	0	0.453	0.462
	ENH1	AT2G42220	630351	618539	3702.AT5G17170.1	3702.AT2G42220.1	0	0	0	0	0.462	0	0	0	0.462
	AT5G58330	AT1G35420	634048	611307	3702.AT5G58330.1	3702.AT1G35420.2	0	0	0	0	0.462	0	0	0	0.462
	APG3	SULA	624529	616306	3702.AT3G62910.1	3702.AT2G21280.1	0	0	0	0	0.445	0	0	0.072	0.462
	emb2726	LrgB	627535	611016	3702.AT4G29060.1	3702.AT1G32080.1	0	0	0	0	0.461	0	0	0	0.461
	CYP94B1	LOX4	634584	614050	3702.AT5G63450.1	3702.AT1G72520.1	0	0	0	0	0.124	0	0	0.411	0.461
	AT1G56500	AT1G14270	612554	609262	3702.AT1G56500.1	3702.AT1G14270.1	0.06	0	0	0	0.45	0	0	0	0.461
	AT4G01150	SULA	624737	616306	3702.AT4G01150.1	3702.AT2G21280.1	0	0	0	0	0.461	0	0	0	0.461
	KNAT1	MP	625227	609837	3702.AT4G08150.1	3702.AT1G19850.1	0	0	0	0	0.118	0	0	0.415	0.461
	AT5G58330	APL2	634048	610587	3702.AT5G58330.1	3702.AT1G27680.1	0	0	0	0	0.094	0	0	0.43	0.461
	AT5G51190	AT5G14450	633273	630068	3702.AT5G51190.1	3702.AT5G14450.1	0	0	0	0	0	0	0	0.462	0.461
	HCF101	AT1G57770	621724	612601	3702.AT3G24430.1	3702.AT1G57770.1	0	0	0	0	0.431	0	0	0.09	0.46
	FBA2	AT2G37660	628603	618044	3702.AT4G38970.1	3702.AT2G37660.1	0	0	0	0	0.453	0	0	0.053	0.46
	CSP41A	NTRC	624555	618481	3702.AT3G63140.1	3702.AT2G41680.1	0	0	0	0	0.46	0	0	0	0.46
	emb2184	AT1G14270	614342	609262	3702.AT1G75350.1	3702.AT1G14270.1	0.079	0	0	0	0.437	0	0	0	0.459
	PSBO2	HCF101	623254	621724	3702.AT3G50820.1	3702.AT3G24430.1	0	0	0	0	0.46	0	0	0	0.459
	AT1G60000	LrgB	612742	611016	3702.AT1G60000.1	3702.AT1G32080.1	0	0	0	0	0.459	0	0	0	0.459
	AT1G63100	CSLD5	613063	608023	3702.AT1G63100.1	3702.AT1G02730.1	0	0	0	0	0.46	0	0	0	0.459
	APE2	AT1G35420	632718	611307	3702.AT5G46110.4	3702.AT1G35420.2	0	0	0	0	0.46	0	0	0	0.459
	AT3G59080	ATL2	624123	620875	3702.AT3G59080.1	3702.AT3G16720.1	0	0	0	0	0.459	0	0	0	0.459
	SAL1	PIN1	634640	614158	3702.AT5G63980.1	3702.AT1G73590.1	0	0	0	0	0	0.45	0	0.057	0.459
	AT1G57770	TLP18.3	612601	612371	3702.AT1G57770.1	3702.AT1G54780.1	0	0	0	0	0.459	0	0	0	0.459
	HCF136	AT2G26500	630913	616844	3702.AT5G23120.1	3702.AT2G26500.1	0	0	0	0	0.46	0	0	0	0.459
	TL29	TRX-M4	625316	620727	3702.AT4G09010.1	3702.AT3G15360.1	0	0	0	0	0.422	0	0	0.104	0.459
	AT5G51190	AT1G23710	633273	610241	3702.AT5G51190.1	3702.AT1G23710.1	0	0	0	0	0.46	0	0	0	0.459
	APG3	SBPASE	624529	623790	3702.AT3G62910.1	3702.AT3G55800.1	0	0	0	0	0.423	0	0	0.101	0.459
	PDX2	PRXQ	634277	621899	3702.AT5G60540.1	3702.AT3G26060.2	0.056	0	0	0	0	0	0	0.451	0.459
	PETC	AT1G12250	624981	609050	3702.AT4G03280.1	3702.AT1G12250.1	0.077	0	0	0	0.438	0	0	0	0.459
	PSAL	THIC	625711	617168	3702.AT4G12800.1	3702.AT2G29630.2	0	0	0	0	0.338	0	0	0.216	0.458
	LQY1	AT1G57770	614373	612601	3702.AT1G75690.1	3702.AT1G57770.1	0	0	0	0	0.458	0	0	0	0.458
	PSBQ-2	AT1G35420	625139	611307	3702.AT4G05180.1	3702.AT1G35420.2	0	0	0	0	0.457	0	0	0	0.457
	NTRC	AT2G37660	618481	618044	3702.AT2G41680.1	3702.AT2G37660.1	0.058	0	0	0	0.446	0	0	0.043	0.457
	AT4G01150	AT1G51110	624737	611974	3702.AT4G01150.1	3702.AT1G51110.1	0	0	0	0	0.457	0	0	0	0.457
	NTRC	LQY1	618481	614373	3702.AT2G41680.1	3702.AT1G75690.1	0	0	0	0	0.457	0	0	0	0.457
	HCF136	AT1G14270	630913	609262	3702.AT5G23120.1	3702.AT1G14270.1	0	0	0	0	0.457	0	0	0	0.457
	KNAT1	PIN1	625227	614158	3702.AT4G08150.1	3702.AT1G73590.1	0	0	0	0	0.087	0	0	0.43	0.457
	CCR4	BCS1	632905	623267	3702.AT5G47850.1	3702.AT3G50930.1	0	0	0	0	0.283	0.048	0	0.269	0.457
	HSFA4A	AT1G49850	626431	611851	3702.AT4G18880.1	3702.AT1G49850.1	0	0	0	0	0	0	0	0.457	0.457
	AT4G27280	AT3G54630	627335	623659	3702.AT4G27280.1	3702.AT3G54630.1	0	0	0	0	0.057	0	0	0.447	0.456
	AT5G10690	APG3	629716	624529	3702.AT5G10690.1	3702.AT3G62910.1	0	0	0	0	0.456	0	0	0	0.456
	PSBW	AT1G35420	617266	611307	3702.AT2G30570.1	3702.AT1G35420.2	0	0	0	0	0.456	0	0	0	0.456
	AT5G52970	PSAH2	633461	612091	3702.AT5G52970.1	3702.AT1G52230.1	0	0	0	0	0.456	0	0	0	0.456
	AT1G60000	FNR2	612742	609854	3702.AT1G60000.1	3702.AT1G20020.1	0	0	0	0	0.456	0	0	0	0.456
	HCF136	CaS	630913	630907	3702.AT5G23120.1	3702.AT5G23060.1	0	0	0	0	0.456	0	0	0	0.456
	SULA	CYP97A3	616306	610986	3702.AT2G21280.1	3702.AT1G31800.1	0	0	0	0	0.456	0	0	0	0.456
	HCF136	AT1G51110	630913	611974	3702.AT5G23120.1	3702.AT1G51110.1	0	0	0	0	0.456	0	0	0	0.456
	PSBW	CP5	617266	613237	3702.AT2G30570.1	3702.AT1G64720.1	0	0	0	0	0.206	0	0	0.343	0.456
	CRD1	AT3G47650	623904	622907	3702.AT3G56940.1	3702.AT3G47650.1	0	0	0	0	0.456	0	0	0	0.456
	PSI-P	AT1G56500	619027	612554	3702.AT2G46820.1	3702.AT1G56500.1	0	0	0	0	0.456	0	0	0	0.456
	PSAN	AT1G51110	634646	611974	3702.AT5G64040.2	3702.AT1G51110.1	0	0	0	0	0.456	0	0	0	0.456
	TL29	AT1G12250	625316	609050	3702.AT4G09010.1	3702.AT1G12250.1	0	0	0	0	0.427	0	0	0.089	0.455
	GDH1	GPDHC1	630457	618469	3702.AT5G18170.1	3702.AT2G41540.2	0.075	0	0	0	0.056	0.124	0	0.372	0.455
	AT4G01150	AT1G04420	624737	608196	3702.AT4G01150.1	3702.AT1G04420.1	0	0	0	0	0.455	0	0	0	0.455
	PSBO2	AT1G14270	623254	609262	3702.AT3G50820.1	3702.AT1G14270.1	0	0	0	0	0.455	0	0	0	0.455
	AT5G58330	CRD1	634048	623904	3702.AT5G58330.1	3702.AT3G56940.1	0	0	0	0	0.454	0	0	0	0.454
	TL29	AT1G14270	625316	609262	3702.AT4G09010.1	3702.AT1G14270.1	0	0	0	0	0.454	0	0	0	0.454
	CRD1	FNR2	623904	609854	3702.AT3G56940.1	3702.AT1G20020.1	0	0	0	0	0.454	0	0	0	0.454
	AT5G17350	AT5G10690	630371	629716	3702.AT5G17350.1	3702.AT5G10690.1	0	0	0	0	0	0	0	0.454	0.454
	AT5G51190	AT3G59080	633273	624123	3702.AT5G51190.1	3702.AT3G59080.1	0	0	0	0	0.398	0	0	0.131	0.454
	emb2184	GLYR2	614342	609619	3702.AT1G75350.1	3702.AT1G17650.1	0.153	0	0	0	0.382	0	0	0	0.454
	emb2726	PTAC5	627535	625808	3702.AT4G29060.1	3702.AT4G13670.1	0	0	0	0	0.453	0	0	0	0.453
	SBPASE	AT1G57770	623790	612601	3702.AT3G55800.1	3702.AT1G57770.1	0	0	0	0	0.453	0	0	0	0.453
	MYB15	AT1G58420	621596	612662	3702.AT3G23250.1	3702.AT1G58420.1	0	0	0	0	0.452	0	0	0	0.452
	LRP1	PAO5	629888	627607	3702.AT5G12330.4	3702.AT4G29720.1	0	0	0	0	0	0	0	0.452	0.452
	APE2	AT1G56500	632718	612554	3702.AT5G46110.4	3702.AT1G56500.1	0	0	0	0	0.42	0	0	0.095	0.452
	TL29	CRD1	625316	623904	3702.AT4G09010.1	3702.AT3G56940.1	0	0	0	0	0.452	0	0	0	0.452
	AT2G26500	AT1G60000	616844	612742	3702.AT2G26500.1	3702.AT1G60000.1	0	0	0	0	0.452	0	0	0	0.452
	PSAN	AT5G52970	634646	633461	3702.AT5G64040.2	3702.AT5G52970.1	0	0	0	0	0.452	0	0	0	0.452
	AT3G17020	HPR	620908	613587	3702.AT3G17020.1	3702.AT1G68010.2	0	0	0	0	0	0	0	0.452	0.452
	ENH1	AT1G56500	630351	612554	3702.AT5G17170.1	3702.AT1G56500.1	0	0	0	0	0.451	0	0	0	0.451
	PSAN	ENH1	634646	630351	3702.AT5G64040.2	3702.AT5G17170.1	0	0	0	0	0.442	0	0	0.058	0.451
	AT1G57770	AT1G14270	612601	609262	3702.AT1G57770.1	3702.AT1G14270.1	0	0	0	0	0.451	0	0	0	0.451
	NTRC	AT1G51110	618481	611974	3702.AT2G41680.1	3702.AT1G51110.1	0	0	0	0	0.451	0	0	0	0.451
	AT5G58330	PSBQ-2	634048	625139	3702.AT5G58330.1	3702.AT4G05180.1	0	0	0	0	0.45	0	0	0	0.45
	ENH1	AT1G60000	630351	612742	3702.AT5G17170.1	3702.AT1G60000.1	0	0	0	0	0.45	0	0	0	0.45
	emb2184	AT1G56500	614342	612554	3702.AT1G75350.1	3702.AT1G56500.1	0.101	0	0	0	0.414	0	0	0	0.45
	XTH32	ADF5	617956	615813	3702.AT2G36870.1	3702.AT2G16700.1	0	0	0	0	0	0	0	0.45	0.45
	AT1G35420	LrgB	611307	611016	3702.AT1G35420.2	3702.AT1G32080.1	0	0	0	0	0.45	0	0	0	0.45
	PRXQ	GLX1	621899	609003	3702.AT3G26060.2	3702.AT1G11840.6	0.07	0	0	0	0.124	0	0	0.378	0.449
	PSBQ-2	SULA	625139	616306	3702.AT4G05180.1	3702.AT2G21280.1	0	0	0	0	0.449	0	0	0	0.449
	LrgB	AT1G12250	611016	609050	3702.AT1G32080.1	3702.AT1G12250.1	0.058	0	0	0	0.44	0	0	0	0.449
	AT5G10690	emb2726	629716	627535	3702.AT5G10690.1	3702.AT4G29060.1	0	0	0	0	0.449	0	0	0	0.449
	HCF101	PSI-P	621724	619027	3702.AT3G24430.1	3702.AT2G46820.1	0	0	0	0	0.449	0	0	0	0.449
	PETC	AT1G14270	624981	609262	3702.AT4G03280.1	3702.AT1G14270.1	0	0	0	0	0.449	0	0	0	0.449
	AT2G26500	LrgB	616844	611016	3702.AT2G26500.1	3702.AT1G32080.1	0	0	0	0	0.449	0	0	0	0.449
	PSI-P	AT1G35420	619027	611307	3702.AT2G46820.1	3702.AT1G35420.2	0	0	0	0	0.448	0	0	0	0.448
	LSH3	KNAT6	617335	610211	3702.AT2G31160.1	3702.AT1G23380.2	0	0	0	0	0.059	0	0	0.438	0.448
	PRR5	SVP	631062	616433	3702.AT5G24470.1	3702.AT2G22540.1	0	0	0	0	0	0.094	0	0.416	0.448
	TRX-M4	AT2G31040	620727	617320	3702.AT3G15360.1	3702.AT2G31040.1	0	0	0	0	0.448	0	0	0	0.448
	CaS	AT1G56500	630907	612554	3702.AT5G23060.1	3702.AT1G56500.1	0	0	0	0	0.448	0	0	0	0.448
	TL29	RCA	625316	618258	3702.AT4G09010.1	3702.AT2G39730.1	0	0	0	0	0.414	0	0	0.097	0.448
	PSBW	AT1G51110	617266	611974	3702.AT2G30570.1	3702.AT1G51110.1	0	0	0	0	0.448	0	0	0	0.448
	PTAC5	AT1G14270	625808	609262	3702.AT4G13670.1	3702.AT1G14270.1	0	0	0	0	0.448	0	0	0	0.448
	PSAN	AT1G18060	634646	609659	3702.AT5G64040.2	3702.AT1G18060.1	0	0	0	0	0.448	0	0	0	0.448
	PSAL	LrgB	625711	611016	3702.AT4G12800.1	3702.AT1G32080.1	0	0	0	0	0.448	0	0	0	0.448
	AT5G52970	AT2G26500	633461	616844	3702.AT5G52970.1	3702.AT2G26500.1	0	0	0	0	0.447	0	0	0	0.447
	SHM1	AT3G47650	628497	622907	3702.AT4G37930.1	3702.AT3G47650.1	0	0	0	0	0.447	0	0	0	0.447
	AT5G58330	AT5G52970	634048	633461	3702.AT5G58330.1	3702.AT5G52970.1	0	0	0	0	0.447	0	0	0	0.447
	ENH1	TL29	630351	625316	3702.AT5G17170.1	3702.AT4G09010.1	0	0	0	0	0.447	0	0	0	0.447
	CaS	AT1G14270	630907	609262	3702.AT5G23060.1	3702.AT1G14270.1	0	0	0	0	0.447	0	0	0	0.447
	APG3	AT1G14270	624529	609262	3702.AT3G62910.1	3702.AT1G14270.1	0.053	0	0	0	0.441	0	0	0	0.447
	AT1G14270	GAPA-2	609262	609120	3702.AT1G14270.1	3702.AT1G12900.1	0.058	0	0	0	0.437	0	0	0	0.447
	CaS	emb2726	630907	627535	3702.AT5G23060.1	3702.AT4G29060.1	0	0	0	0	0.446	0	0	0	0.446
	CaS	CYP97A3	630907	610986	3702.AT5G23060.1	3702.AT1G31800.1	0	0	0	0	0.441	0	0	0.05	0.446
	HCF101	AT2G42220	621724	618539	3702.AT3G24430.1	3702.AT2G42220.1	0	0	0	0	0.446	0	0	0	0.446
	PSAL	AT1G51110	625711	611974	3702.AT4G12800.1	3702.AT1G51110.1	0	0	0	0	0.446	0	0	0	0.446
	PSBO2	AT1G04420	623254	608196	3702.AT3G50820.1	3702.AT1G04420.1	0	0	0	0	0.446	0	0	0	0.446
	AT5G58330	LHCB6	634048	609430	3702.AT5G58330.1	3702.AT1G15820.1	0	0	0	0	0.435	0	0	0.059	0.446
	CSP41A	AT1G60000	624555	612742	3702.AT3G63140.1	3702.AT1G60000.1	0	0	0	0	0.446	0	0	0	0.446
	PSI-P	AT1G60000	619027	612742	3702.AT2G46820.1	3702.AT1G60000.1	0	0	0	0	0.446	0	0	0	0.446
	AT3G47070	SULA	622854	616306	3702.AT3G47070.1	3702.AT2G21280.1	0	0	0	0	0.446	0	0	0	0.446
	TL29	AT2G26500	625316	616844	3702.AT4G09010.1	3702.AT2G26500.1	0	0	0	0	0.446	0	0	0	0.446
	PLP7	AT3G05510	623695	619672	3702.AT3G54950.1	3702.AT3G05510.1	0	0	0	0	0	0.155	0	0.372	0.446
	APE2	AT1G60000	632718	612742	3702.AT5G46110.4	3702.AT1G60000.1	0	0	0	0	0.441	0.048	0	0	0.445
	SULA	AT1G12250	616306	609050	3702.AT2G21280.1	3702.AT1G12250.1	0	0	0	0	0.445	0	0	0	0.445
	WRKY33	RIPK	618130	615363	3702.AT2G38470.1	3702.AT2G05940.1	0	0	0	0	0.418	0	0	0.086	0.445
	AT2G26500	AT1G12250	616844	609050	3702.AT2G26500.1	3702.AT1G12250.1	0	0	0	0	0.445	0	0	0	0.445
	AT1G35420	CRB	611307	608726	3702.AT1G35420.2	3702.AT1G09340.1	0	0	0	0	0.445	0	0	0	0.445
	AT1G60000	PSAH2	612742	612091	3702.AT1G60000.1	3702.AT1G52230.1	0	0	0	0	0.445	0	0	0	0.445
	HCF101	PSAH2	621724	612091	3702.AT3G24430.1	3702.AT1G52230.1	0	0	0	0	0.445	0	0	0	0.445
	AT3G59080	GATL10	624123	622158	3702.AT3G59080.1	3702.AT3G28340.1	0	0	0	0	0.445	0	0	0	0.445
	SHM1	AT1G14270	628497	609262	3702.AT4G37930.1	3702.AT1G14270.1	0.171	0	0	0	0.357	0	0	0	0.444
	AT2G26500	AT1G14270	616844	609262	3702.AT2G26500.1	3702.AT1G14270.1	0	0	0	0	0.444	0	0	0	0.444
	PSAN	AT1G35420	634646	611307	3702.AT5G64040.2	3702.AT1G35420.2	0	0	0	0	0.444	0	0	0	0.444
	REV	CSLD5	634295	608023	3702.AT5G60690.1	3702.AT1G02730.1	0	0	0	0	0.117	0	0	0.397	0.444
	PSAN	AT1G12250	634646	609050	3702.AT5G64040.2	3702.AT1G12250.1	0	0	0	0	0.427	0	0	0.07	0.444
	AT5G52970	PSBQ-2	633461	625139	3702.AT5G52970.1	3702.AT4G05180.1	0	0	0	0	0.444	0	0	0	0.444
	PCK1	GAPA-2	628490	609120	3702.AT4G37870.1	3702.AT1G12900.1	0.063	0	0	0	0.133	0	0	0.371	0.444
	FBA2	AT1G60000	628603	612742	3702.AT4G38970.1	3702.AT1G60000.1	0	0	0	0	0.444	0	0	0	0.444
	FBA2	SULA	628603	616306	3702.AT4G38970.1	3702.AT2G21280.1	0	0	0	0	0.444	0	0	0	0.444
	PSI-P	AT1G14270	619027	609262	3702.AT2G46820.1	3702.AT1G14270.1	0	0	0	0	0.444	0	0	0	0.444
	RCA	AT1G51110	618258	611974	3702.AT2G39730.1	3702.AT1G51110.1	0	0	0	0	0.443	0	0	0	0.443
	SBPASE	AT1G12250	623790	609050	3702.AT3G55800.1	3702.AT1G12250.1	0	0	0	0	0.443	0	0	0	0.443
	AT5G10690	AT1G14270	629716	609262	3702.AT5G10690.1	3702.AT1G14270.1	0	0	0	0	0.443	0	0	0	0.443
	HCF136	AT2G37660	630913	618044	3702.AT5G23120.1	3702.AT2G37660.1	0	0	0	0	0.443	0	0	0	0.443
	AT3G06950	SVR1	619837	618197	3702.AT3G06950.1	3702.AT2G39140.1	0.189	0	0	0	0.135	0	0	0.269	0.442
	PSAL	AT1G56500	625711	612554	3702.AT4G12800.1	3702.AT1G56500.1	0	0	0	0	0.418	0	0	0.081	0.442
	ENH1	AT1G35420	630351	611307	3702.AT5G17170.1	3702.AT1G35420.2	0	0	0	0	0.442	0	0	0	0.442
	HCF136	AT3G47650	630913	622907	3702.AT5G23120.1	3702.AT3G47650.1	0	0	0	0	0.442	0	0	0	0.442
	FBA2	AT1G51110	628603	611974	3702.AT4G38970.1	3702.AT1G51110.1	0	0	0	0	0.441	0	0	0	0.441
	HPR	AT1G57770	613587	612601	3702.AT1G68010.2	3702.AT1G57770.1	0	0	0	0	0.423	0	0	0.072	0.441
	LHCB4.2	AT1G35420	620000	611307	3702.AT3G08940.2	3702.AT1G35420.2	0	0	0	0	0.441	0	0	0	0.441
	CYP83B1	GSTF11	627801	619411	3702.AT4G31500.1	3702.AT3G03190.1	0	0	0	0	0.045	0	0	0.439	0.441
	AT3G47650	RCA	622907	618258	3702.AT3G47650.1	3702.AT2G39730.1	0	0	0	0	0.441	0	0	0	0.441
	APE2	PTAC5	632718	625808	3702.AT5G46110.4	3702.AT4G13670.1	0	0	0	0	0.227	0	0	0.307	0.441
	TLP18.3	CYP97A3	612371	610986	3702.AT1G54780.1	3702.AT1G31800.1	0	0	0	0	0.441	0	0	0	0.441
	PCK1	PSBO2	628490	623254	3702.AT4G37870.1	3702.AT3G50820.1	0	0	0	0	0	0	0	0.44	0.44
	CaS	emb2184	630907	614342	3702.AT5G23060.1	3702.AT1G75350.1	0	0	0	0	0.44	0	0	0	0.44
	HCF136	ENH1	630913	630351	3702.AT5G23120.1	3702.AT5G17170.1	0	0	0	0	0.44	0	0	0	0.44
	FNR2	AT1G14270	609854	609262	3702.AT1G20020.1	3702.AT1G14270.1	0	0	0	0	0.44	0	0	0	0.44
	AT5G66770	IDD2	634949	623239	3702.AT5G66770.1	3702.AT3G50700.1	0	0	0	0	0	0.121	0	0.389	0.44
	AT3G47650	AT1G12250	622907	609050	3702.AT3G47650.1	3702.AT1G12250.1	0	0	0	0	0.44	0	0	0	0.44
	LrgB	CYP97A3	611016	610986	3702.AT1G32080.1	3702.AT1G31800.1	0	0	0	0	0.439	0	0	0	0.439
	TRX1	PSBO2	623277	623254	3702.AT3G51030.1	3702.AT3G50820.1	0	0	0	0	0	0	0	0.439	0.439
	PA2	RNR2A	629332	621629	3702.AT5G06720.1	3702.AT3G23580.1	0	0	0	0	0	0	0	0.438	0.438
	PSAH2	AT1G35420	612091	611307	3702.AT1G52230.1	3702.AT1G35420.2	0	0	0	0	0.438	0	0	0	0.438
	AT4G01150	AT1G60000	624737	612742	3702.AT4G01150.1	3702.AT1G60000.1	0	0	0	0	0.438	0	0	0	0.438
	TL29	AT1G57770	625316	612601	3702.AT4G09010.1	3702.AT1G57770.1	0	0	0	0	0.414	0	0	0.081	0.438
	AT2G26500	AT1G04420	616844	608196	3702.AT2G26500.1	3702.AT1G04420.1	0	0	0	0	0.438	0	0	0	0.438
	AT5G52970	AT4G01150	633461	624737	3702.AT5G52970.1	3702.AT4G01150.1	0	0	0	0	0.438	0	0	0	0.438
	PSBQ-2	LrgB	625139	611016	3702.AT4G05180.1	3702.AT1G32080.1	0	0	0	0	0.438	0	0	0	0.438
	PSBW	SULA	617266	616306	3702.AT2G30570.1	3702.AT2G21280.1	0	0	0	0	0.438	0	0	0	0.438
	AT5G52970	CRD1	633461	623904	3702.AT5G52970.1	3702.AT3G56940.1	0	0	0	0	0.438	0	0	0	0.438
	AT5G13810	NTRC	630000	618481	3702.AT5G13810.1	3702.AT2G41680.1	0	0	0	0	0	0	0	0.438	0.438
	AT4G08850	CRK2	625294	613851	3702.AT4G08850.1	3702.AT1G70520.1	0	0	0	0.672	0.409	0.088	0	0	0.437
	PSBW	LrgB	617266	611016	3702.AT2G30570.1	3702.AT1G32080.1	0	0	0	0	0.437	0	0	0	0.437
	AT5G52970	AT1G35420	633461	611307	3702.AT5G52970.1	3702.AT1G35420.2	0	0	0	0	0.437	0	0	0	0.437
	AT5G65260	LSH3	634782	617335	3702.AT5G65260.1	3702.AT2G31160.1	0	0	0	0	0	0	0	0.437	0.437
	LHW	WOX4	616924	611574	3702.AT2G27230.2	3702.AT1G46480.1	0	0	0	0	0	0	0	0.437	0.437
	CaS	TRX-M4	630907	620727	3702.AT5G23060.1	3702.AT3G15360.1	0	0	0	0	0.436	0	0	0	0.436
	CYCD3;1	KNAT1	628093	625227	3702.AT4G34160.1	3702.AT4G08150.1	0	0	0	0	0.175	0	0	0.345	0.436
	AT5G52970	AT1G56500	633461	612554	3702.AT5G52970.1	3702.AT1G56500.1	0	0	0	0	0.436	0	0	0	0.436
	HCF136	AT1G60000	630913	612742	3702.AT5G23120.1	3702.AT1G60000.1	0	0	0	0	0.412	0	0	0.081	0.436
	FBA2	AT1G56500	628603	612554	3702.AT4G38970.1	3702.AT1G56500.1	0.047	0	0	0	0.418	0.065	0	0	0.436
	AT3G47070	DAC	622854	621007	3702.AT3G47070.1	3702.AT3G17930.1	0	0	0	0	0.425	0	0	0.06	0.436
	PSI-P	AT1G12250	619027	609050	3702.AT2G46820.1	3702.AT1G12250.1	0	0	0	0	0.436	0	0	0	0.436
	APE2	AT1G51110	632718	611974	3702.AT5G46110.4	3702.AT1G51110.1	0	0	0	0	0.435	0	0	0	0.435
	TRX-M4	AT1G35420	620727	611307	3702.AT3G15360.1	3702.AT1G35420.2	0	0	0	0	0.435	0	0	0	0.435
	AT3G47070	AT1G60000	622854	612742	3702.AT3G47070.1	3702.AT1G60000.1	0	0	0	0	0.435	0	0	0	0.435
	GDH1	NTRC	630457	618481	3702.AT5G18170.1	3702.AT2G41680.1	0.176	0	0	0	0.051	0.049	0	0.331	0.435
	AT2G37660	AT2G26500	618044	616844	3702.AT2G37660.1	3702.AT2G26500.1	0	0	0	0	0.435	0	0	0	0.435
	PHT4;1	AT1G51110	617170	611974	3702.AT2G29650.1	3702.AT1G51110.1	0	0	0	0	0.435	0	0	0	0.435
	CYP97A3	GAPA-2	610986	609120	3702.AT1G31800.1	3702.AT1G12900.1	0	0	0	0	0.435	0	0	0	0.435
	AT3G47650	CYP97A3	622907	610986	3702.AT3G47650.1	3702.AT1G31800.1	0	0	0	0	0.435	0	0	0	0.435
	APE2	AT1G14270	632718	609262	3702.AT5G46110.4	3702.AT1G14270.1	0	0	0	0	0.435	0	0	0	0.435
	BCS1	AT2G41640	623267	618477	3702.AT3G50930.1	3702.AT2G41640.1	0	0	0	0	0.434	0	0	0	0.434
	AT1G60000	AT1G51110	612742	611974	3702.AT1G60000.1	3702.AT1G51110.1	0	0	0	0	0.434	0	0	0	0.434
	APG3	CRB	624529	608726	3702.AT3G62910.1	3702.AT1G09340.1	0	0	0	0	0.434	0	0	0	0.434
	CRD1	AT1G60000	623904	612742	3702.AT3G56940.1	3702.AT1G60000.1	0	0	0	0	0.434	0	0	0	0.434
	DAC	PSI-P	621007	619027	3702.AT3G17930.1	3702.AT2G46820.1	0	0	0	0	0.31	0	0	0.213	0.434
	AT1G57770	FNR2	612601	609854	3702.AT1G57770.1	3702.AT1G20020.1	0	0	0	0	0.433	0	0	0	0.433
	AT1G57770	AT1G18060	612601	609659	3702.AT1G57770.1	3702.AT1G18060.1	0	0	0	0	0.433	0	0	0	0.433
	AT4G01150	AT1G14270	624737	609262	3702.AT4G01150.1	3702.AT1G14270.1	0	0	0	0	0.433	0	0	0	0.433
	FBA2	AT1G35420	628603	611307	3702.AT4G38970.1	3702.AT1G35420.2	0	0	0	0	0.433	0	0	0	0.433
	AT2G26500	AT1G51110	616844	611974	3702.AT2G26500.1	3702.AT1G51110.1	0	0	0	0	0.432	0	0	0	0.432
	emb2184	HPR	614342	613587	3702.AT1G75350.1	3702.AT1G68010.2	0	0	0	0	0.432	0	0	0	0.432
	LHCB4.2	AT1G75280	620000	614335	3702.AT3G08940.2	3702.AT1G75280.1	0	0	0	0	0	0	0	0.432	0.432
	PCK1	RCA	628490	618258	3702.AT4G37870.1	3702.AT2G39730.1	0	0	0	0	0.044	0	0	0.431	0.432
	HCF101	RCA	621724	618258	3702.AT3G24430.1	3702.AT2G39730.1	0	0	0	0	0.432	0	0	0	0.432
	TL29	AT1G35420	625316	611307	3702.AT4G09010.1	3702.AT1G35420.2	0	0	0	0	0.432	0	0	0	0.432
	PSBO2	AT1G56500	623254	612554	3702.AT3G50820.1	3702.AT1G56500.1	0	0	0	0	0.423	0	0	0.057	0.432
	CaS	DAC	630907	621007	3702.AT5G23060.1	3702.AT3G17930.1	0	0	0	0	0.295	0	0	0.228	0.432
	PCK1	At1g55510	628490	612445	3702.AT4G37870.1	3702.AT1G55510.1	0	0	0	0	0.254	0	0	0.268	0.431
	ENH1	AT1G14270	630351	609262	3702.AT5G17170.1	3702.AT1G14270.1	0	0	0	0	0.431	0	0	0	0.431
	At5g46330	WRKY33	632741	618130	3702.AT5G46330.1	3702.AT2G38470.1	0	0	0	0	0	0	0	0.431	0.431
	CSP41A	CYP97A3	624555	610986	3702.AT3G63140.1	3702.AT1G31800.1	0	0	0	0	0.431	0	0	0	0.431
	BGLU44	sks5	621022	614419	3702.AT3G18080.1	3702.AT1G76160.1	0	0	0	0	0	0	0	0.431	0.431
	AT1G35420	FNR2	611307	609854	3702.AT1G35420.2	3702.AT1G20020.1	0	0	0	0	0.431	0	0	0	0.431
	emb2726	AT2G42220	627535	618539	3702.AT4G29060.1	3702.AT2G42220.1	0	0	0	0	0.431	0	0	0	0.431
	SULA	PSAH2	616306	612091	3702.AT2G21280.1	3702.AT1G52230.1	0	0	0	0	0.431	0	0	0	0.431
	FBA2	HCF101	628603	621724	3702.AT4G38970.1	3702.AT3G24430.1	0	0	0	0	0.431	0	0	0	0.431
	TRX-M4	APL2	620727	610587	3702.AT3G15360.1	3702.AT1G27680.1	0	0	0	0	0	0.044	0	0.43	0.431
	AT1G51110	AT1G35420	611974	611307	3702.AT1G51110.1	3702.AT1G35420.2	0	0	0	0	0.431	0	0	0	0.431
	PSAL	AT3G47650	625711	622907	3702.AT4G12800.1	3702.AT3G47650.1	0	0	0	0	0.43	0	0	0	0.43
	PSBO2	AT1G57770	623254	612601	3702.AT3G50820.1	3702.AT1G57770.1	0	0	0	0	0.43	0	0	0	0.43
	PSAL	sks5	625711	614419	3702.AT4G12800.1	3702.AT1G76160.1	0	0	0	0	0	0	0	0.43	0.43
	TRX-M4	AT1G12250	620727	609050	3702.AT3G15360.1	3702.AT1G12250.1	0	0	0	0	0.43	0	0	0	0.43
	APG3	TLP18.3	624529	612371	3702.AT3G62910.1	3702.AT1G54780.1	0.112	0	0	0	0.341	0	0	0.105	0.43
	WRKY48	HOS3-1	633090	628377	3702.AT5G49520.1	3702.AT4G36830.1	0	0	0	0	0	0	0	0.43	0.43
	SBPASE	TRX1	623790	623277	3702.AT3G55800.1	3702.AT3G51030.1	0	0	0	0	0	0	0	0.43	0.43
	PSI-P	CYP97A3	619027	610986	3702.AT2G46820.1	3702.AT1G31800.1	0	0	0	0	0.42	0	0	0.058	0.43
	AT4G32250	MGD1	627882	627830	3702.AT4G32250.2	3702.AT4G31780.2	0	0	0	0	0	0	0	0.43	0.43
	AT2G42220	AT1G35420	618539	611307	3702.AT2G42220.1	3702.AT1G35420.2	0	0	0	0	0.43	0	0	0	0.43
	AT3G15110	FNR2	620694	609854	3702.AT3G15110.1	3702.AT1G20020.1	0	0	0	0	0.43	0	0	0	0.43
	AT5G51190	AT5G17350	633273	630371	3702.AT5G51190.1	3702.AT5G17350.1	0	0	0	0	0.43	0	0	0	0.43
	AT5G66770	AT1G19210	634949	609774	3702.AT5G66770.1	3702.AT1G19210.1	0	0	0	0	0	0	0	0.43	0.43
	AT5G58330	HCF136	634048	630913	3702.AT5G58330.1	3702.AT5G23120.1	0	0	0	0	0.423	0	0	0.054	0.43
	AT2G42220	AT1G04420	618539	608196	3702.AT2G42220.1	3702.AT1G04420.1	0	0	0	0	0.43	0	0	0	0.43
	LrgB	LHCB6	611016	609430	3702.AT1G32080.1	3702.AT1G15820.1	0	0	0	0	0.429	0	0	0	0.429
	PSAH2	AT1G12250	612091	609050	3702.AT1G52230.1	3702.AT1G12250.1	0	0	0	0	0.429	0	0	0	0.429
	TL29	AT1G18060	625316	609659	3702.AT4G09010.1	3702.AT1G18060.1	0	0	0	0	0.429	0	0	0	0.429
	APE2	APL2	632718	610587	3702.AT5G46110.4	3702.AT1G27680.1	0	0	0	0	0.101	0	0	0.391	0.429
	LHW	ATHB-15	616924	612083	3702.AT2G27230.2	3702.AT1G52150.2	0	0	0	0	0.073	0	0	0.41	0.429
	AT2G42220	AT1G14270	618539	609262	3702.AT2G42220.1	3702.AT1G14270.1	0	0	0	0	0.429	0	0	0	0.429
	APG3	AT3G47650	624529	622907	3702.AT3G62910.1	3702.AT3G47650.1	0	0	0	0	0.429	0	0	0	0.429
	PTAC5	SULA	625808	616306	3702.AT4G13670.1	3702.AT2G21280.1	0	0	0	0	0.429	0	0	0	0.429
	AT2G37660	PSAO	618044	608627	3702.AT2G37660.1	3702.AT1G08380.1	0	0	0	0	0.429	0	0	0	0.429
	GDH1	At1g55510	630457	612445	3702.AT5G18170.1	3702.AT1G55510.1	0.185	0	0	0	0.154	0	0	0.238	0.429
	CRD1	AT2G37660	623904	618044	3702.AT3G56940.1	3702.AT2G37660.1	0	0	0	0	0.429	0	0	0	0.429
	AT1G35420	AT1G14270	611307	609262	3702.AT1G35420.2	3702.AT1G14270.1	0.059	0	0	0	0.418	0	0	0	0.428
	ENH1	SHM1	630351	628497	3702.AT5G17170.1	3702.AT4G37930.1	0	0	0	0	0.428	0	0	0	0.428
	RGL1	PHYA	613410	608751	3702.AT1G66350.1	3702.AT1G09570.1	0	0	0	0	0	0	0	0.428	0.428
	PTAC5	CRB	625808	608726	3702.AT4G13670.1	3702.AT1G09340.1	0	0	0	0	0.428	0	0	0	0.428
	APG3	AT1G56500	624529	612554	3702.AT3G62910.1	3702.AT1G56500.1	0.059	0	0	0	0.417	0	0	0	0.427
	AT3G47650	AT1G57770	622907	612601	3702.AT3G47650.1	3702.AT1G57770.1	0	0	0	0	0.427	0	0	0	0.427
	UGT88A1	TLP18.3	620852	612371	3702.AT3G16520.3	3702.AT1G54780.1	0	0	0	0	0.427	0	0	0	0.426
	HCF101	AT1G35420	621724	611307	3702.AT3G24430.1	3702.AT1G35420.2	0	0	0	0	0.426	0	0	0	0.426
	AT3G47070	AT1G14270	622854	609262	3702.AT3G47070.1	3702.AT1G14270.1	0	0	0	0	0.427	0	0	0	0.426
	PTAC5	APG3	625808	624529	3702.AT4G13670.1	3702.AT3G62910.1	0	0	0	0	0.426	0	0	0	0.426
	HCF136	emb2726	630913	627535	3702.AT5G23120.1	3702.AT4G29060.1	0	0	0	0	0.426	0	0	0	0.426
	AT1G12250	PSAO	609050	608627	3702.AT1G12250.1	3702.AT1G08380.1	0	0	0	0	0.425	0	0	0	0.425
	ANT	KNAT1	628478	625227	3702.AT4G37750.1	3702.AT4G08150.1	0	0	0	0	0.155	0	0	0.348	0.425
	AT3G53190	AT2G36570	623508	617922	3702.AT3G53190.1	3702.AT2G36570.1	0	0	0	0	0.339	0	0	0.166	0.425
	emb2726	RCA	627535	618258	3702.AT4G29060.1	3702.AT2G39730.1	0	0	0	0	0.425	0	0	0	0.425
	TL29	AT1G60000	625316	612742	3702.AT4G09010.1	3702.AT1G60000.1	0	0	0	0	0.425	0	0	0	0.425
	PSAL	AT1G12250	625711	609050	3702.AT4G12800.1	3702.AT1G12250.1	0	0	0	0	0.407	0	0	0.071	0.425
	APG3	GAPA-2	624529	609120	3702.AT3G62910.1	3702.AT1G12900.1	0	0	0	0	0.404	0	0	0.076	0.425
	emb2726	CRD1	627535	623904	3702.AT4G29060.1	3702.AT3G56940.1	0	0	0	0	0.423	0	0	0.045	0.425
	NTRC	AT1G57770	618481	612601	3702.AT2G41680.1	3702.AT1G57770.1	0	0	0	0	0.422	0	0	0.046	0.425
	DAC	SULA	621007	616306	3702.AT3G17930.1	3702.AT2G21280.1	0	0	0	0	0.424	0	0	0	0.424
	CRD1	LrgB	623904	611016	3702.AT3G56940.1	3702.AT1G32080.1	0	0	0	0	0.425	0	0	0	0.424
	emb2726	PSAL	627535	625711	3702.AT4G29060.1	3702.AT4G12800.1	0	0	0	0	0.298	0	0	0.213	0.424
	AT5G58330	GDH1	634048	630457	3702.AT5G58330.1	3702.AT5G18170.1	0.059	0	0	0	0.092	0	0	0.38	0.424
	AT4G01150	AT1G18060	624737	609659	3702.AT4G01150.1	3702.AT1G18060.1	0	0	0	0	0.425	0	0	0	0.424
	PTAC5	AT1G12250	625808	609050	3702.AT4G13670.1	3702.AT1G12250.1	0	0	0	0	0.424	0	0	0	0.424
	AT5G58330	CYP97A3	634048	610986	3702.AT5G58330.1	3702.AT1G31800.1	0	0	0	0	0.424	0	0	0	0.424
	FBA2	AT1G14270	628603	609262	3702.AT4G38970.1	3702.AT1G14270.1	0	0	0	0	0.424	0	0	0	0.424
	LrgB	PSAO	611016	608627	3702.AT1G32080.1	3702.AT1G08380.1	0	0	0	0	0.424	0	0	0	0.424
	AT5G51190	AT2G41640	633273	618477	3702.AT5G51190.1	3702.AT2G41640.1	0	0	0	0	0.424	0	0	0	0.424
	AT5G52970	FBA2	633461	628603	3702.AT5G52970.1	3702.AT4G38970.1	0	0	0	0	0.424	0	0	0	0.424
	AT5G16030	LHCB4.2	630230	620000	3702.AT5G16030.3	3702.AT3G08940.2	0	0	0	0	0.425	0	0	0	0.424
	AT5G66770	MPA24.5	634949	634832	3702.AT5G66770.1	3702.AT5G65700.2	0	0	0	0	0.123	0	0	0.371	0.424
	AT3G47070	AT1G57770	622854	612601	3702.AT3G47070.1	3702.AT1G57770.1	0	0	0	0	0.425	0	0	0	0.424
	PSAL	AT1G60000	625711	612742	3702.AT4G12800.1	3702.AT1G60000.1	0	0	0	0	0.423	0	0	0	0.423
	PSBW	AT1G12250	617266	609050	3702.AT2G30570.1	3702.AT1G12250.1	0	0	0	0	0.423	0	0	0	0.423
	AT1G35420	LHCB6	611307	609430	3702.AT1G35420.2	3702.AT1G15820.1	0	0	0	0	0.423	0	0	0	0.423
	RCA	SULA	618258	616306	3702.AT2G39730.1	3702.AT2G21280.1	0	0	0	0	0.423	0	0	0	0.423
	AO	GPDHC1	630099	618469	3702.AT5G14760.1	3702.AT2G41540.2	0.173	0	0	0	0	0	0	0.33	0.422
	AT1G56500	PSAH2	612554	612091	3702.AT1G56500.1	3702.AT1G52230.1	0	0	0	0	0.422	0	0	0	0.422
	PSBW	AT1G14270	617266	609262	3702.AT2G30570.1	3702.AT1G14270.1	0	0	0	0	0.422	0	0	0	0.422
	AT3G15110	AT2G31040	620694	617320	3702.AT3G15110.1	3702.AT2G31040.1	0	0	0	0	0.422	0	0	0	0.422
	AT1G51110	PSAO	611974	608627	3702.AT1G51110.1	3702.AT1G08380.1	0	0	0	0	0.423	0	0	0	0.422
	CRD1	AT1G14270	623904	609262	3702.AT3G56940.1	3702.AT1G14270.1	0	0	0	0	0.422	0	0	0	0.422
	AT5G52970	CYP97A3	633461	610986	3702.AT5G52970.1	3702.AT1G31800.1	0	0	0	0	0.422	0	0	0	0.422
	PSAL	AT1G57770	625711	612601	3702.AT4G12800.1	3702.AT1G57770.1	0	0	0	0	0.422	0	0	0	0.422
	BCB	STZ	630684	610593	3702.AT5G20230.1	3702.AT1G27730.1	0	0	0	0	0.423	0	0	0	0.422
	AT1G56500	AT1G35420	612554	611307	3702.AT1G56500.1	3702.AT1G35420.2	0.048	0	0	0	0.418	0	0	0	0.422
	CRD1	AT3G47070	623904	622854	3702.AT3G56940.1	3702.AT3G47070.1	0	0	0	0	0.422	0	0	0	0.422
	AT5G58330	AT2G37660	634048	618044	3702.AT5G58330.1	3702.AT2G37660.1	0.058	0	0	0	0.392	0	0	0.072	0.422
	AT3G47650	PSBW	622907	617266	3702.AT3G47650.1	3702.AT2G30570.1	0	0	0	0	0.422	0	0	0	0.422
	ATHB-7	BLH1	619012	617855	3702.AT2G46680.1	3702.AT2G35940.3	0	0	0	0	0.181	0.044	0	0.321	0.421
	AT5G51190	MKK9	633273	614150	3702.AT5G51190.1	3702.AT1G73500.1	0	0	0	0	0.41	0	0	0.059	0.421
	APE2	ENH1	632718	630351	3702.AT5G46110.4	3702.AT5G17170.1	0	0	0	0	0.421	0	0	0	0.421
	HCF136	APG3	630913	624529	3702.AT5G23120.1	3702.AT3G62910.1	0	0	0	0	0.41	0	0	0.058	0.421
	FBA2	AT1G57770	628603	612601	3702.AT4G38970.1	3702.AT1G57770.1	0	0	0	0	0.421	0	0	0	0.421
	CYP97A3	AT1G14270	610986	609262	3702.AT1G31800.1	3702.AT1G14270.1	0	0	0	0	0.421	0	0	0	0.421
	BLH1	NAC014	617855	611114	3702.AT2G35940.3	3702.AT1G33060.2	0	0	0	0	0	0	0	0.42	0.42
	AT1G35420	PSAO	611307	608627	3702.AT1G35420.2	3702.AT1G08380.1	0	0	0	0	0.42	0	0	0	0.42
	AT3G62260	FBS1	624462	612876	3702.AT3G62260.2	3702.AT1G61340.2	0	0	0	0	0.42	0	0	0	0.42
	UGT88A1	PSAH2	620852	612091	3702.AT3G16520.3	3702.AT1G52230.1	0	0	0	0	0.421	0	0	0	0.42
	PME44	ABCB2	627989	627196	3702.AT4G33220.1	3702.AT4G25960.1	0	0	0	0	0.42	0	0	0	0.42
	AT1G51110	LHCB6	611974	609430	3702.AT1G51110.1	3702.AT1G15820.1	0	0	0	0	0.42	0	0	0	0.42
	CaS	AT1G57770	630907	612601	3702.AT5G23060.1	3702.AT1G57770.1	0	0	0	0	0.421	0	0	0	0.42
	PSAH2	AT1G14270	612091	609262	3702.AT1G52230.1	3702.AT1G14270.1	0	0	0	0	0.42	0	0	0	0.42
	CRD1	AT1G35420	623904	611307	3702.AT3G56940.1	3702.AT1G35420.2	0	0	0	0	0.42	0	0	0	0.42
	APG3	AT1G51110	624529	611974	3702.AT3G62910.1	3702.AT1G51110.1	0	0	0	0	0.42	0	0	0	0.42
	BCB	MYB15	630684	621596	3702.AT5G20230.1	3702.AT3G23250.1	0	0	0	0	0.396	0	0	0.08	0.42
	ENH1	PSAO	630351	608627	3702.AT5G17170.1	3702.AT1G08380.1	0	0	0	0	0.42	0	0	0	0.42
	PSAN	AT1G60000	634646	612742	3702.AT5G64040.2	3702.AT1G60000.1	0	0	0	0	0.421	0	0	0	0.42
	PSBO2	UGT88A1	623254	620852	3702.AT3G50820.1	3702.AT3G16520.3	0	0	0	0	0.416	0	0	0.047	0.419
	PCK1	HPR	628490	613587	3702.AT4G37870.1	3702.AT1G68010.2	0	0	0	0	0.044	0	0	0.417	0.419
	HCF136	AT1G02475	630913	607998	3702.AT5G23120.1	3702.AT1G02475.1	0	0	0.25	0	0.258	0	0	0	0.419
	AT3G18680	NTRC	621091	618481	3702.AT3G18680.1	3702.AT2G41680.1	0.19	0	0	0	0.308	0	0	0.046	0.419
	emb2726	AT2G26500	627535	616844	3702.AT4G29060.1	3702.AT2G26500.1	0	0	0	0	0.419	0	0	0	0.419
	SHM1	APL2	628497	610587	3702.AT4G37930.1	3702.AT1G27680.1	0	0	0	0	0.048	0	0	0.414	0.418
	AT2G42220	AT1G57770	618539	612601	3702.AT2G42220.1	3702.AT1G57770.1	0	0	0	0	0.418	0	0	0	0.418
	TL29	APG3	625316	624529	3702.AT4G09010.1	3702.AT3G62910.1	0	0	0	0	0.418	0	0	0	0.418
	TRX-M4	AT1G14270	620727	609262	3702.AT3G15360.1	3702.AT1G14270.1	0	0	0	0	0.418	0	0	0	0.418
	ARASP	HPR	617479	613587	3702.AT2G32480.1	3702.AT1G68010.2	0	0	0	0	0.418	0	0	0	0.418
	AT4G01150	CYP97A3	624737	610986	3702.AT4G01150.1	3702.AT1G31800.1	0	0	0	0	0.419	0	0	0	0.418
	PSAL	AT1G02475	625711	607998	3702.AT4G12800.1	3702.AT1G02475.1	0	0	0.228	0	0.278	0	0	0	0.418
	ABCB2	AT1G09310	627196	608723	3702.AT4G25960.1	3702.AT1G09310.1	0	0	0	0	0.419	0	0	0	0.418
	AT2G42220	AT1G56500	618539	612554	3702.AT2G42220.1	3702.AT1G56500.1	0	0	0	0	0.418	0	0	0	0.418
	AT3G47650	AT1G18060	622907	609659	3702.AT3G47650.1	3702.AT1G18060.1	0	0	0	0	0.419	0	0	0	0.418
	PSAN	AT1G57770	634646	612601	3702.AT5G64040.2	3702.AT1G57770.1	0	0	0	0	0.407	0	0	0.06	0.418
	AT2G37660	AT1G51110	618044	611974	3702.AT2G37660.1	3702.AT1G51110.1	0	0	0	0	0.417	0	0	0	0.417
	APT5	AT3G18680	629765	621091	3702.AT5G11160.1	3702.AT3G18680.1	0.189	0	0	0	0	0	0	0.311	0.417
	PSI-P	AT1G57770	619027	612601	3702.AT2G46820.1	3702.AT1G57770.1	0	0	0	0	0.417	0	0	0	0.417
	APE2	PHT4;1	632718	617170	3702.AT5G46110.4	3702.AT2G29650.1	0	0	0	0	0.263	0	0	0.242	0.417
	FBA2	emb2726	628603	627535	3702.AT4G38970.1	3702.AT4G29060.1	0	0	0	0	0.417	0	0	0	0.417
	AT4G01150	AT1G35420	624737	611307	3702.AT4G01150.1	3702.AT1G35420.2	0	0	0	0	0.417	0	0	0	0.416
	FBA2	GAUT15	628603	624093	3702.AT4G38970.1	3702.AT3G58790.1	0	0	0	0	0	0	0	0.417	0.416
	AT2G41640	AT2G01820	618477	615002	3702.AT2G41640.1	3702.AT2G01820.1	0	0	0	0	0	0	0	0.416	0.416
	AT3G47650	AT1G35420	622907	611307	3702.AT3G47650.1	3702.AT1G35420.2	0	0	0	0	0.417	0	0	0	0.416
	AT5G58330	AT2G42220	634048	618539	3702.AT5G58330.1	3702.AT2G42220.1	0	0	0	0	0.416	0	0	0	0.416
	APG3	AT1G60000	624529	612742	3702.AT3G62910.1	3702.AT1G60000.1	0	0	0	0	0.417	0	0	0	0.416
	AT1G57770	GA2OX2	612601	610812	3702.AT1G57770.1	3702.AT1G30040.1	0	0	0	0	0	0	0	0.416	0.416
	ENH1	CYP97A3	630351	610986	3702.AT5G17170.1	3702.AT1G31800.1	0	0	0	0	0.417	0	0	0	0.416
	AT1G35420	AT1G04420	611307	608196	3702.AT1G35420.2	3702.AT1G04420.1	0.059	0	0	0	0.404	0	0	0	0.416
	AT5G16990	XTH9	630331	624974	3702.AT5G16990.1	3702.AT4G03210.1	0	0	0	0	0	0	0	0.416	0.416
	AT5G52970	PSAO	633461	608627	3702.AT5G52970.1	3702.AT1G08380.1	0	0	0	0	0.417	0	0	0	0.416
	AT3G18680	AT3G06950	621091	619837	3702.AT3G18680.1	3702.AT3G06950.1	0.173	0	0	0	0.323	0	0	0	0.416
	AT3G15110	AT1G14270	620694	609262	3702.AT3G15110.1	3702.AT1G14270.1	0	0	0	0	0.416	0	0	0	0.416
	AT2G26500	AT1G57770	616844	612601	3702.AT2G26500.1	3702.AT1G57770.1	0	0	0	0	0.415	0	0	0	0.415
	AT5G65260	AT1G60000	634782	612742	3702.AT5G65260.1	3702.AT1G60000.1	0	0	0.329	0	0.043	0.162	0	0.042	0.415
	PRXQ	AT3G18680	621899	621091	3702.AT3G26060.2	3702.AT3G18680.1	0.177	0	0	0	0.319	0	0	0	0.415
	PCK1	RNR2A	628490	621629	3702.AT4G37870.1	3702.AT3G23580.1	0.182	0	0	0	0.048	0	0	0.31	0.415
	CRD1	emb2184	623904	614342	3702.AT3G56940.1	3702.AT1G75350.1	0	0	0	0	0.415	0	0	0	0.415
	AT3G47070	AT1G04420	622854	608196	3702.AT3G47070.1	3702.AT1G04420.1	0	0	0	0	0.415	0	0	0	0.415
	AT1G57770	PSAH2	612601	612091	3702.AT1G57770.1	3702.AT1G52230.1	0	0	0	0	0.414	0	0	0	0.414
	AT5G52970	PSBW	633461	617266	3702.AT5G52970.1	3702.AT2G30570.1	0	0	0	0	0.415	0	0	0	0.414
	TRX-M4	AT1G57770	620727	612601	3702.AT3G15360.1	3702.AT1G57770.1	0	0	0	0	0.415	0	0	0	0.414
	AT3G62260	AT1G23710	624462	610241	3702.AT3G62260.2	3702.AT1G23710.1	0	0	0	0	0.415	0	0	0	0.414
	NTRC	ARASP	618481	617479	3702.AT2G41680.1	3702.AT2G32480.1	0.19	0	0	0	0.306	0	0	0	0.414
	PETC	CYP97A3	624981	610986	3702.AT4G03280.1	3702.AT1G31800.1	0	0	0	0	0.414	0	0	0	0.414
	AT5G52970	AT1G57770	633461	612601	3702.AT5G52970.1	3702.AT1G57770.1	0	0	0	0	0.415	0	0	0	0.414
	TRX-M4	AT2G42220	620727	618539	3702.AT3G15360.1	3702.AT2G42220.1	0	0	0	0	0.414	0	0	0	0.414
	AT1G56500	PSAO	612554	608627	3702.AT1G56500.1	3702.AT1G08380.1	0	0	0	0	0.414	0	0	0	0.414
	APE2	UGT88A1	632718	620852	3702.AT5G46110.4	3702.AT3G16520.3	0	0	0	0	0.414	0	0	0	0.414
	BCS1	GATL10	623267	622158	3702.AT3G50930.1	3702.AT3G28340.1	0	0	0	0	0.414	0	0	0	0.414
	AT4G01150	AT1G56500	624737	612554	3702.AT4G01150.1	3702.AT1G56500.1	0	0	0	0	0.415	0	0	0	0.414
	AT5G16030	PSAH2	630230	612091	3702.AT5G16030.3	3702.AT1G52230.1	0	0	0	0	0.414	0	0	0	0.414
	PTAC5	CSP41A	625808	624555	3702.AT4G13670.1	3702.AT3G63140.1	0	0	0	0	0.414	0	0	0	0.414
	PSBW	AT1G60000	617266	612742	3702.AT2G30570.1	3702.AT1G60000.1	0	0	0	0	0.413	0	0	0	0.413
	RBOHD	AT5G21105	632911	630770	3702.AT5G47910.1	3702.AT5G21105.1	0	0	0	0	0.115	0.084	0	0.335	0.413
	PSBQ-2	AT2G37660	625139	618044	3702.AT4G05180.1	3702.AT2G37660.1	0	0	0	0	0.413	0	0	0	0.413
	NTRC	AT1G48450	618481	611712	3702.AT2G41680.1	3702.AT1G48450.1	0	0	0	0	0.159	0.33	0	0	0.412
	AT2G26500	AT1G56500	616844	612554	3702.AT2G26500.1	3702.AT1G56500.1	0	0	0	0	0.412	0	0	0	0.412
	WRKY48	BCS1	633090	623267	3702.AT5G49520.1	3702.AT3G50930.1	0	0	0	0	0.412	0	0	0	0.412
	HSFA4A	RIPK	626431	615363	3702.AT4G18880.1	3702.AT2G05940.1	0	0	0	0	0.397	0.065	0	0	0.412
	AT5G52970	LHCB6	633461	609430	3702.AT5G52970.1	3702.AT1G15820.1	0	0	0	0	0.413	0	0	0	0.412
	PSBW	AT1G56500	617266	612554	3702.AT2G30570.1	3702.AT1G56500.1	0	0	0	0	0.413	0	0	0	0.412
	APG3	LQY1	624529	614373	3702.AT3G62910.1	3702.AT1G75690.1	0	0	0	0	0.412	0	0	0	0.412
	PSBQ-2	AT1G56500	625139	612554	3702.AT4G05180.1	3702.AT1G56500.1	0	0	0	0	0.413	0	0	0	0.412
	PSAN	AT5G58330	634646	634048	3702.AT5G64040.2	3702.AT5G58330.1	0	0	0	0	0.412	0	0	0	0.412
	FBA2	AT1G04420	628603	608196	3702.AT4G38970.1	3702.AT1G04420.1	0	0	0	0	0.384	0.084	0	0	0.412
	AT3G47650	AT1G56500	622907	612554	3702.AT3G47650.1	3702.AT1G56500.1	0	0	0	0	0.412	0	0	0	0.412
	AT5G52970	PTAC5	633461	625808	3702.AT5G52970.1	3702.AT4G13670.1	0	0	0	0	0.412	0	0	0	0.412
	PSBW	AT1G57770	617266	612601	3702.AT2G30570.1	3702.AT1G57770.1	0	0	0	0	0.412	0	0	0	0.412
	AT5G58330	TRX1	634048	623277	3702.AT5G58330.1	3702.AT3G51030.1	0.054	0	0	0	0	0.048	0	0.398	0.411
	AT1G60000	CYP97A3	612742	610986	3702.AT1G60000.1	3702.AT1G31800.1	0	0	0	0	0.376	0.094	0	0	0.411
	AT1G60000	AT1G04420	612742	608196	3702.AT1G60000.1	3702.AT1G04420.1	0	0	0	0	0.411	0	0	0	0.411
	PTAC5	PRXQ	625808	621899	3702.AT4G13670.1	3702.AT3G26060.2	0	0	0	0	0.411	0	0	0	0.411
	AT3G15110	AT1G51110	620694	611974	3702.AT3G15110.1	3702.AT1G51110.1	0	0	0	0	0.41	0	0	0	0.41
	AT5G52970	SHM1	633461	628497	3702.AT5G52970.1	3702.AT4G37930.1	0	0	0	0	0.41	0	0	0	0.41
	PTAC5	AT1G60000	625808	612742	3702.AT4G13670.1	3702.AT1G60000.1	0	0	0	0	0.41	0	0	0	0.41
	CaS	UGT88A1	630907	620852	3702.AT5G23060.1	3702.AT3G16520.3	0	0	0	0	0.41	0	0	0	0.41
	BCS1	RIPK	623267	615363	3702.AT3G50930.1	3702.AT2G05940.1	0	0	0	0	0.406	0.048	0	0	0.41
	SBPASE	AT1G09310	623790	608723	3702.AT3G55800.1	3702.AT1G09310.1	0	0	0	0	0.411	0	0	0	0.41
	PETC	THIC	624981	617168	3702.AT4G03280.1	3702.AT2G29630.2	0	0	0	0	0.41	0	0	0	0.41
	AT4G01150	AT1G57770	624737	612601	3702.AT4G01150.1	3702.AT1G57770.1	0	0	0	0	0.41	0	0	0	0.41
	AT1G18060	LHCB6	609659	609430	3702.AT1G18060.1	3702.AT1G15820.1	0	0	0	0	0.411	0	0	0	0.41
	emb2184	LHCB6	614342	609430	3702.AT1G75350.1	3702.AT1G15820.1	0	0	0	0	0.41	0	0	0	0.41
	AT1G60000	PSAO	612742	608627	3702.AT1G60000.1	3702.AT1G08380.1	0	0	0	0	0.41	0	0	0	0.41
	IAMT1	At5g17990	633715	630437	3702.AT5G55250.1	3702.AT5G17990.1	0	0	0	0	0	0	0	0.411	0.41
	PTAC5	HCF101	625808	621724	3702.AT4G13670.1	3702.AT3G24430.1	0	0	0	0	0.41	0	0	0	0.41
	SHM1	SULA	628497	616306	3702.AT4G37930.1	3702.AT2G21280.1	0	0	0	0	0.409	0	0	0	0.409
	PHT4;1	LHCB6	617170	609430	3702.AT2G29650.1	3702.AT1G15820.1	0	0	0	0	0.409	0	0	0	0.409
	HSFA4A	AT3G59080	626431	624123	3702.AT4G18880.1	3702.AT3G59080.1	0	0	0	0	0.409	0	0	0	0.409
	AT4G01150	AT1G12250	624737	609050	3702.AT4G01150.1	3702.AT1G12250.1	0	0	0	0	0.409	0	0	0	0.409
	HCF101	AT2G31040	621724	617320	3702.AT3G24430.1	3702.AT2G31040.1	0	0	0	0	0.323	0	0	0.164	0.409
	APG3	PSI-P	624529	619027	3702.AT3G62910.1	3702.AT2G46820.1	0	0	0	0	0.408	0	0	0	0.408
	AT5G52970	APE2	633461	632718	3702.AT5G52970.1	3702.AT5G46110.4	0	0	0	0	0.408	0	0	0	0.408
	GATL10	ATL2	622158	620875	3702.AT3G28340.1	3702.AT3G16720.1	0	0	0	0	0.409	0	0	0	0.408
	AT3G47070	CYP97A3	622854	610986	3702.AT3G47070.1	3702.AT1G31800.1	0	0	0	0	0.409	0	0	0	0.408
	CYP97A3	AT1G04420	610986	608196	3702.AT1G31800.1	3702.AT1G04420.1	0	0	0	0	0.408	0	0	0	0.408
	BCS1	ATL2	623267	620875	3702.AT3G50930.1	3702.AT3G16720.1	0	0	0	0	0.408	0	0	0	0.408
	PTAC5	PSBO2	625808	623254	3702.AT4G13670.1	3702.AT3G50820.1	0	0	0	0	0.408	0	0	0	0.408
	PTAC5	AT2G37660	625808	618044	3702.AT4G13670.1	3702.AT2G37660.1	0	0	0	0	0.408	0	0	0	0.408
	LQY1	CYP97A3	614373	610986	3702.AT1G75690.1	3702.AT1G31800.1	0	0	0	0	0.408	0	0	0	0.408
	AT3G15110	AT2G37660	620694	618044	3702.AT3G15110.1	3702.AT2G37660.1	0	0	0	0	0.408	0	0	0	0.408
	AT1G18060	PSAO	609659	608627	3702.AT1G18060.1	3702.AT1G08380.1	0	0	0	0	0.409	0	0	0	0.408
	PSAN	AT1G14270	634646	609262	3702.AT5G64040.2	3702.AT1G14270.1	0	0	0	0	0.407	0	0	0	0.407
	AT1G14270	PSAO	609262	608627	3702.AT1G14270.1	3702.AT1G08380.1	0	0	0	0	0.407	0	0	0	0.407
	RCA	AT1G35420	618258	611307	3702.AT2G39730.1	3702.AT1G35420.2	0	0	0	0	0.407	0	0	0	0.407
	HCF136	PTAC5	630913	625808	3702.AT5G23120.1	3702.AT4G13670.1	0	0	0	0	0.407	0	0	0	0.407
	PTAC5	AT3G47650	625808	622907	3702.AT4G13670.1	3702.AT3G47650.1	0	0	0	0	0.407	0	0	0	0.407
	LHCB4.2	LrgB	620000	611016	3702.AT3G08940.2	3702.AT1G32080.1	0	0	0	0	0.407	0	0	0	0.407
	CYP97A3	AT1G18060	610986	609659	3702.AT1G31800.1	3702.AT1G18060.1	0	0	0	0	0.407	0	0	0	0.407
	emb2726	AT1G56500	627535	612554	3702.AT4G29060.1	3702.AT1G56500.1	0	0	0	0	0.407	0	0	0	0.407
	AT2G37660	PSBW	618044	617266	3702.AT2G37660.1	3702.AT2G30570.1	0	0	0	0	0.407	0	0	0	0.407
	emb2184	AT1G35420	614342	611307	3702.AT1G75350.1	3702.AT1G35420.2	0	0	0	0	0.407	0	0	0	0.407
	HCF101	AT1G12250	621724	609050	3702.AT3G24430.1	3702.AT1G12250.1	0	0	0	0	0.407	0	0	0	0.407
	RCA	AT1G57770	618258	612601	3702.AT2G39730.1	3702.AT1G57770.1	0	0	0	0	0.406	0	0	0	0.406
	SNAP33	HSFA4A	634349	626431	3702.AT5G61210.1	3702.AT4G18880.1	0	0	0	0	0.406	0	0	0	0.406
	TRX-M4	AT2G37660	620727	618044	3702.AT3G15360.1	3702.AT2G37660.1	0	0	0	0	0.406	0	0	0	0.406
	APG3	CYP97A3	624529	610986	3702.AT3G62910.1	3702.AT1G31800.1	0	0	0	0	0.406	0	0	0	0.406
	CSP41A	APG3	624555	624529	3702.AT3G63140.1	3702.AT3G62910.1	0	0	0	0	0.406	0	0	0	0.406
	PTAC5	TL29	625808	625316	3702.AT4G13670.1	3702.AT4G09010.1	0	0	0	0	0.406	0	0	0	0.406
	RDR1	SDE3	609324	608310	3702.AT1G14790.1	3702.AT1G05460.1	0	0	0	0	0	0.081	0	0.38	0.406
	HCF101	TRX-M4	621724	620727	3702.AT3G24430.1	3702.AT3G15360.1	0	0	0	0	0.386	0	0	0.072	0.405
	PTAC5	emb2184	625808	614342	3702.AT4G13670.1	3702.AT1G75350.1	0	0	0	0	0.405	0	0	0	0.405
	PSBQ-2	AT1G14270	625139	609262	3702.AT4G05180.1	3702.AT1G14270.1	0	0	0	0	0.405	0	0	0	0.405
	APG3	FNR2	624529	609854	3702.AT3G62910.1	3702.AT1G20020.1	0	0	0	0	0.405	0	0	0	0.405
	PSAL	AT1G14270	625711	609262	3702.AT4G12800.1	3702.AT1G14270.1	0	0	0	0	0.404	0	0	0	0.404
	UGT88A1	PSAO	620852	608627	3702.AT3G16520.3	3702.AT1G08380.1	0	0	0	0	0.404	0	0	0	0.404
	BCS1	FBS1	623267	612876	3702.AT3G50930.1	3702.AT1G61340.2	0	0	0	0	0.404	0	0	0	0.404
	APE2	CP5	632718	613237	3702.AT5G46110.4	3702.AT1G64720.1	0	0	0	0	0.154	0	0	0.325	0.404
	PSAL	AT2G37660	625711	618044	3702.AT4G12800.1	3702.AT2G37660.1	0	0	0	0	0.404	0	0	0	0.404
	PHB	KNAT6	617724	610211	3702.AT2G34710.1	3702.AT1G23380.2	0	0	0	0	0.06	0	0	0.392	0.404
	PTAC5	FNR2	625808	609854	3702.AT4G13670.1	3702.AT1G20020.1	0	0	0	0	0.403	0	0	0	0.403
	CaS	AT1G12250	630907	609050	3702.AT5G23060.1	3702.AT1G12250.1	0	0	0	0	0.403	0	0	0	0.403
	APG3	AT3G15110	624529	620694	3702.AT3G62910.1	3702.AT3G15110.1	0	0	0	0	0.403	0	0	0	0.403
	BCS1	AT1G58420	623267	612662	3702.AT3G50930.1	3702.AT1G58420.1	0	0	0	0	0.403	0	0	0	0.403
	PSBQ-2	AT1G60000	625139	612742	3702.AT4G05180.1	3702.AT1G60000.1	0	0	0	0	0.403	0	0	0	0.403
	AT1G57770	AT1G04420	612601	608196	3702.AT1G57770.1	3702.AT1G04420.1	0.049	0	0	0	0.398	0	0	0	0.403
	AT3G15110	LQY1	620694	614373	3702.AT3G15110.1	3702.AT1G75690.1	0	0	0	0	0.402	0	0	0	0.402
	CRD1	AT1G56500	623904	612554	3702.AT3G56940.1	3702.AT1G56500.1	0	0	0	0	0.402	0	0	0	0.402
	MYB15	FBS1	621596	612876	3702.AT3G23250.1	3702.AT1G61340.2	0	0	0	0	0.402	0	0	0	0.402
	PHT4;1	TLP18.3	617170	612371	3702.AT2G29650.1	3702.AT1G54780.1	0	0	0	0	0.402	0	0	0	0.402
	RCA	AT1G01320	618258	607875	3702.AT2G39730.1	3702.AT1G01320.1	0	0	0	0	0.402	0	0	0	0.402
	AT1G60000	LHCB6	612742	609430	3702.AT1G60000.1	3702.AT1G15820.1	0	0	0	0	0.402	0	0	0	0.402
	PSAL	SULA	625711	616306	3702.AT4G12800.1	3702.AT2G21280.1	0	0	0	0	0.401	0	0	0	0.401
	IAMT1	SCL3	633715	611904	3702.AT5G55250.1	3702.AT1G50420.1	0	0	0	0	0	0	0	0.401	0.401
	PSAN	CP5	634646	613237	3702.AT5G64040.2	3702.AT1G64720.1	0	0	0	0	0.211	0	0	0.273	0.401
	TRN2	AT3G53190	632778	623508	3702.AT5G46700.1	3702.AT3G53190.1	0	0	0	0	0.4	0	0	0	0.4
	TRX-M4	LHCB4.2	620727	620000	3702.AT3G15360.1	3702.AT3G08940.2	0	0	0	0	0.4	0	0	0	0.4
	PSBQ-2	AT1G57770	625139	612601	3702.AT4G05180.1	3702.AT1G57770.1	0	0	0	0	0.4	0	0	0	0.4
	PSAH2	AT1G09310	612091	608723	3702.AT1G52230.1	3702.AT1G09310.1	0	0	0	0	0.401	0	0	0	0.4
	MKK9	AT1G23710	614150	610241	3702.AT1G73500.1	3702.AT1G23710.1	0	0	0	0	0.401	0	0	0	0.4
	HCF101	AT2G26500	621724	616844	3702.AT3G24430.1	3702.AT2G26500.1	0	0	0	0	0.4	0	0	0	0.4
	PSAN	HCF101	634646	621724	3702.AT5G64040.2	3702.AT3G24430.1	0	0	0	0	0.4	0	0	0	0.4
	emb2726	AT4G01150	627535	624737	3702.AT4G29060.1	3702.AT4G01150.1	0	0	0	0	0.4	0	0	0	0.4
	RCA	AT1G60000	618258	612742	3702.AT2G39730.1	3702.AT1G60000.1	0	0	0	0	0.4	0	0	0	0.4
	FBA2	AT1G09310	628603	608723	3702.AT4G38970.1	3702.AT1G09310.1	0	0	0	0	0.4	0	0	0	0.4
	AT3G18680	AT1G14270	621091	609262	3702.AT3G18680.1	3702.AT1G14270.1	0.14	0	0	0	0.331	0	0	0	0.4
	MYB68	AT2G18360	634841	615992	3702.AT5G65790.1	3702.AT2G18360.1	0	0	0	0	0.4	0	0	0	0.4
	LHCB4.2	AT1G51110	620000	611974	3702.AT3G08940.2	3702.AT1G51110.1	0	0	0	0	0.4	0	0	0	0.4
	AT5G10690	HCF101	629716	621724	3702.AT5G10690.1	3702.AT3G24430.1	0	0	0	0	0.401	0	0	0	0.4
	GAPA-2	AT1G09310	609120	608723	3702.AT1G12900.1	3702.AT1G09310.1	0	0	0	0	0.401	0	0	0	0.4
	GATL10	AT1G58420	622158	612662	3702.AT3G28340.1	3702.AT1G58420.1	0	0	0	0	0.401	0	0	0	0.4
	RBOHD	WRKY70	632911	623849	3702.AT5G47910.1	3702.AT3G56400.1	0	0	0	0	0.055	0	0	0.392	0.4
